# Supplementary material for: Loss of Elongator- and KEOPS-Dependent tRNA Modifications Leads to Severe Growth Phenotypes and Protein Aggregation in Yeast
Source: Preprints.org preprint supplement (doi:10.20944/preprints202001.0188.v1), 2020-01-17
Supplement: Supplementary file 1 [file Supplementary Table S2 20200115.xlsx]

## Sheet: Total Extract
Database: SwissProt.Saccharomyces.cerevisiae	Fold-change relative to WT (2 biological replicates)
entry_name	SUA5_FC	TotPep	UniPep
mRNA 3'-end-processing protein RNA14 Average	6.27634	2	1
Argininosuccinate synthase Average	3.9591	20	2
Squalene monooxygenase Average	3.43982	3	2
Protein AFG1 Average	3.13016	2	1
Nucleoporin NUP192 Average	3.022	2	1
Lysophospholipase 1 Average	3.01351	7	2
3-isopropylmalate dehydratase Average	2.62086	57	15
Branched-chain-amino-acid aminotransferase, mitochondrial Average	2.61972	61	7
Phosphoserine aminotransferase Average	2.59848	2	2
Protein YGP1 Average	2.53946	20	3
Protein AF-9 homolog Average	2.50979	3	1
Peptidyl-prolyl cis-trans isomerase CYP7 Average	2.33703	3	2
AP-3 complex subunit beta Average	2.32767	3	3
Protoplast secreted protein 2 Average	2.21624	5	3
BNI1-related protein 1 Average	2.20474	4	3
RNA-binding protein PIN4 Average	2.19094	2	2
Argininosuccinate lyase Average	2.18117	2	2
Arginine biosynthesis bifunctional protein ArgJ, mitochondrial Average	2.17639	4	3
6,7-dimethyl-8-ribityllumazine synthase Average	2.16179	32	1
Heat shock protein 26 Average	2.15586	45	6
Protein FMP52, mitochondrial Average	2.13368	7	2
Ketol-acid reductoisomerase, mitochondrial Average	2.13011	52	9
Glycine cleavage system H protein, mitochondrial Average	2.10296	3	2
DNA mismatch repair protein MLH1 Average	2.08435	4	3
NADP-specific glutamate dehydrogenase 1 Average	2.06447	64	9
2-oxoglutarate dehydrogenase, mitochondrial Average	2.06229	3	3
Arginase Average	2.05876	10	4
2-isopropylmalate synthase Average	2.03815	42	8
Anaphase-promoting complex subunit CDC27 Average	2.02979	5	1
Helicase SEN1 Average	2.02738	4	3
Carbamoyl-phosphate synthase arginine-specific large chain Average	1.9631	19	8
Tryptophan synthase Average	1.94679	50	10
Dihydroorotate dehydrogenase (fumarate) Average	1.92216	38	7
Glucose-6-phosphate 1-dehydrogenase Average	1.90538	6	2
Asparagine synthetase [glutamine-hydrolyzing] 1 Average	1.87934	18	3
Lanosterol synthase Average	1.8649	2	1
Asparagine--tRNA ligase, cytoplasmic Average	1.86261	26	6
Glycine dehydrogenase [decarboxylating], mitochondrial Average	1.84297	5	2
Multisubstrate pseudouridine synthase 7 Average	1.83845	2	1
Mitochondrial peroxiredoxin PRX1 Average	1.83546	7	3
Adenine phosphoribosyltransferase 1 Average	1.82035	2	1
Regulatory protein SIR3 Average	1.82002	2	2
Glyceraldehyde-3-phosphate dehydrogenase 3 Average	1.81051	13	1
Cytochrome c peroxidase, mitochondrial Average	1.80809	7	3
Isocitrate dehydrogenase [NADP], mitochondrial Average	1.80383	9	4
Asparagine synthetase [glutamine-hydrolyzing] 2 Average	1.80232	12	4
Putative ATP-dependent RNA helicase YLR419W Average	1.79918	3	2
Probable proteasome subunit alpha type-7 Average	1.78326	5	2
37S ribosomal protein S28, mitochondrial Average	1.77637	2	2
Protein MMF1, mitochondrial Average	1.76917	15	2
Cytochrome c oxidase subunit 4, mitochondrial Average	1.76452	2	1
Protein GCY Average	1.76139	2	1
Pentafunctional AROM polypeptide Average	1.76136	7	5
Putative multicopper oxidase GMC1 Average	1.7565	2	2
Nucleoporin NUP157 Average	1.74969	2	2
Proteasome component PRE3 Average	1.74541	3	2
Aspartate-semialdehyde dehydrogenase Average	1.73087	30	4
Threonine synthase Average	1.71536	4	3
Protein MET17 Average	1.70785	34	7
Putative uncharacterized hydrolase YOR131C Average	1.70151	2	1
Citrate synthase, mitochondrial Average	1.69082	26	4
Mediator of RNA polymerase II transcription subunit 1 Average	1.68287	2	2
Heat shock protein SSA1 Average	1.68183	80	13
Serine/threonine-protein kinase DBF20 Average	1.6816	3	2
Malate dehydrogenase, mitochondrial Average	1.68087	5	3
Morphogenesis-related protein MSB1 Average	1.67572	2	1
Peptidyl-prolyl cis-trans isomerase Average	1.67513	67	4
Aminomethyltransferase, mitochondrial Average	1.67392	2	2
Phosphoglycerate kinase Average	1.67329	257	20
Glutamine synthetase Average	1.67321	8	4
Aromatic/aminoadipate aminotransferase 1 Average	1.67292	27	4
Saccharopine dehydrogenase [NAD(+), L-lysine-forming] Average	1.66603	2	1
Ribosome biogenesis protein UTP30 Average	1.6643	2	1
Cell wall mannoprotein HSP150 Average	1.65545	19	2
Heat shock protein SSA4 Average	1.64878	100	9
Inositol polyphosphate multikinase Average	1.6391	3	2
Diphosphomevalonate decarboxylase Average	1.63876	4	1
Glycogen phosphorylase Average	1.61566	6	4
Heat shock protein 70 homolog LHS1 Average	1.61213	2	2
E4 ubiquitin-protein ligase UFD2 Average	1.60928	2	1
Pyruvate carboxylase 2 Average	1.60665	5	2
Transcription initiation factor TFIID subunit 2 Average	1.60542	5	3
Fumarate hydratase, mitochondrial Average	1.60044	4	1
ATP synthase subunit beta, mitochondrial Average	1.59937	65	5
RNA-binding protein SGN1 Average	1.5991	2	1
Hexokinase-1 Average	1.59411	13	5
Family of serine hydrolases 1 Average	1.59391	2	1
Nuclear fusion protein FUS1 Average	1.58447	2	2
Chorismate synthase Average	1.57686	5	2
GTP-binding protein RHO1 Average	1.57632	6	2
Putative glucokinase-2 Average	1.57608	2	2
Cerevisin Average	1.57489	2	2
Protein BOB1 Average	1.5629	2	2
Proteasome chaperone 3 Average	1.56266	2	1
ATP synthase subunit alpha, mitochondrial Average	1.56158	74	8
Heat shock protein 60, mitochondrial Average	1.55656	102	13
Uncharacterized protein YMR315W Average	1.53985	8	2
Cell division control protein 48 Average	1.53872	27	8
Restriction of telomere capping protein 3 Average	1.53789	2	1
Trehalose synthase complex regulatory subunit TSL1 Average	1.53759	4	3
Proteasome subunit beta type-1 Average	1.53505	4	2
External NADH-ubiquinone oxidoreductase 1, mitochondrial Average	1.53416	9	4
Chitin deacetylase 1 Average	1.5329	2	1
ADP,ATP carrier protein 2 Average	1.53261	33	4
Acetolactate synthase catalytic subunit, mitochondrial Average	1.53224	37	4
Hexokinase-2 Average	1.52989	46	7
Protein CASP Average	1.52954	2	1
Mitochondrial phosphate carrier protein Average	1.52746	6	3
Protein ERP6 Average	1.5229	3	1
Uncharacterized membrane protein YML131W Average	1.52264	2	1
Urea amidolyase Average	1.51329	5	4
Heat shock protein 78, mitochondrial Average	1.50602	6	2
Triosephosphate isomerase Average	1.50504	45	5
Putative aryl-alcohol dehydrogenase AAD16 Average	1.50484	15	1
Polyphosphatidylinositol phosphatase INP52 Average	1.50432	2	2
tRNA wybutosine-synthesizing protein 1 Average	1.50391	8	3
Paxillin-like protein 1 Average	1.50169	3	2
Glutaredoxin-1 Average	1.50087	5	1
Leucine carboxyl methyltransferase 2 Average	1.49651	2	1
Peptidyl-prolyl cis-trans isomerase C, mitochondrial Average	1.49406	16	4
Glycogen debranching enzyme Average	1.49399	4	3
Glyceraldehyde-3-phosphate dehydrogenase 1 Average	1.49179	95	13
Putative U6 snRNA phosphodiesterase Average	1.48637	2	1
Cytochrome c oxidase subunit 6B Average	1.48486	2	1
Asparagine--tRNA ligase, mitochondrial Average	1.48391	2	1
Threonine dehydratase, mitochondrial Average	1.48249	3	2
Cell wall mannoprotein CIS3 Average	1.47719	6	1
Acetolactate synthase small subunit, mitochondrial Average	1.47609	6	2
Farnesyl pyrophosphate synthase Average	1.47218	14	3
Nuclear cap-binding protein complex subunit 1 Average	1.47177	2	1
Serine hydroxymethyltransferase, cytosolic Average	1.47116	41	11
Cardiolipin synthase Average	1.47037	2	1
Homocitrate synthase, cytosolic isozyme Average	1.47005	4	3
Cell division control protein KAR1 Average	1.46921	4	2
Structural maintenance of chromosomes protein 1 Average	1.46715	2	2
Chitobiosyldiphosphodolichol beta-mannosyltransferase Average	1.4662	3	1
ATP-dependent DNA helicase HMI1, mitochondrial Average	1.46602	2	1
NifU-like protein, mitochondrial Average	1.46581	2	1
Phosphoglycerate mutase 1 Average	1.46541	321	13
Fimbrin Average	1.46218	13	5
ATP-dependent permease MDL2, mitochondrial Average	1.46202	5	1
Dol-P-Man:Man(5)GlcNAc(2)-PP-Dol alpha-1,3-mannosyltransferase Average	1.46044	9	1
Heat shock protein 104 Average	1.45987	94	15
ADP-ribosylation factor 1 Average	1.45801	13	4
Prohibitin-1 Average	1.45467	4	1
E3 SUMO-protein ligase MMS21 Average	1.45392	3	1
Protein KES1 Average	1.45251	5	3
Ethanolamine kinase Average	1.4509	2	2
Protein translocation protein SEC63 Average	1.4503	2	1
Protein HPH2 Average	1.44595	3	2
Heat shock protein SSA3 Average	1.44415	2	1
6-phosphogluconate dehydrogenase, decarboxylating 1 Average	1.43831	31	6
78 kDa glucose-regulated protein homolog Average	1.43342	48	8
Meiosis protein 5 Average	1.43305	2	2
Leucine--tRNA ligase, mitochondrial Average	1.43282	2	2
Mitochondrial outer membrane protein porin 1 Average	1.43255	63	6
Histidine biosynthesis trifunctional protein Average	1.43187	16	6
Synaptobrevin homolog 1 Average	1.43164	2	2
Squalene synthase Average	1.43104	2	1
Probable 1,3-beta-glucanosyltransferase GAS3 Average	1.43057	2	2
Sec sixty-one protein homolog Average	1.43027	2	1
Phospho-2-dehydro-3-deoxyheptonate aldolase, tyrosine-inhibited Average	1.42903	2	2
Mitochondrial nicotinamide adenine dinucleotide transporter 2 Average	1.42783	4	1
Sulfite reductase [NADPH] flavoprotein component Average	1.42581	3	3
DNA repair protein RAD1 Average	1.42335	2	2
Signaling mucin MSB2 Average	1.42313	3	1
Pyruvate carboxylase 1 Average	1.41922	14	7
Guanine nucleotide exchange factor SRM1 Average	1.41736	2	2
Glyceraldehyde-3-phosphate dehydrogenase 2 Average	1.41406	216	16
Glucokinase-1 Average	1.4073	18	4
60S ribosomal protein L30 Average	1.40311	4	2
Protein UTH1 Average	1.39885	2	1
Basic amino-acid permease Average	1.39758	4	1
Inosine triphosphate pyrophosphatase Average	1.39636	2	2
Actin-related protein 5 Average	1.39625	5	1
COX3 mRNA-specific translational activator PET494 Average	1.39564	2	2
Large subunit GTPase 1 Average	1.39538	2	2
Proteasome component C11 Average	1.39439	4	2
V-type proton ATPase subunit H Average	1.39362	5	3
Glucose-6-phosphate isomerase Average	1.39308	118	10
Phosphoglucomutase-2 Average	1.38966	9	4
Pre-rRNA-processing protein FHL1 Average	1.38697	2	2
Vacuolar transporter chaperone 2 Average	1.38687	3	3
Retrograde regulation protein 2 Average	1.38504	2	2
E3 ubiquitin-protein ligase TOM1 Average	1.38355	3	2
5-methyltetrahydropteroyltriglutamate--homocysteine methyltransferase Average	1.38349	39	12
Isoleucine--tRNA ligase, cytoplasmic Average	1.38233	81	14
Dynein heavy chain, cytoplasmic Average	1.38086	8	6
RNA exonuclease 4 Average	1.3745	2	2
Nucleoside diphosphate kinase Average	1.37373	3	2
Protein disulfide-isomerase Average	1.36833	3	2
PX domain-containing protein YPR097W Average	1.36344	2	2
Anion/proton exchange transporter GEF1 Average	1.36317	2	1
Protein BMH1 Average	1.35885	21	5
Uncharacterized protein YKL050C Average	1.35702	6	2
Putative COX1/OXI3 intron 1 protein Average	1.35492	3	2
Signal recognition particle subunit SRP72 Average	1.35344	2	1
Proteasome subunit beta type-2 Average	1.35321	2	2
Anthranilate synthase component 1 Average	1.34966	12	4
Uncharacterized protein YNL134C Average	1.34428	15	3
Xanthine phosphoribosyltransferase 1 Average	1.34401	2	2
ATP-dependent rRNA helicase SPB4 Average	1.34153	2	1
Tat-binding homolog 7 Average	1.34114	3	3
Protein SSO1 Average	1.33928	3	1
Phosphorelay intermediate protein YPD1 Average	1.33505	2	1
Potassium-activated aldehyde dehydrogenase, mitochondrial Average	1.33263	3	3
Dihydroxy-acid dehydratase, mitochondrial Average	1.33102	20	5
10 kDa heat shock protein, mitochondrial Average	1.32896	13	4
Spindle pole body component SPC98 Average	1.32745	2	2
Lysine--tRNA ligase, cytoplasmic Average	1.3263	36	7
GrpE protein homolog, mitochondrial Average	1.32155	10	3
Endoplasmic reticulum vesicle protein 25 Average	1.32004	2	1
Adenylosuccinate synthetase Average	1.31528	6	2
Heat shock protein SSC1, mitochondrial Average	1.31479	98	17
L-asparaginase 1 Average	1.31387	6	2
Serine/threonine-protein phosphatase 2A 56 kDa regulatory subunit delta isoform Average	1.31046	15	4
Chromo domain-containing protein 1 Average	1.30838	8	5
Cytochrome b-c1 complex subunit 1, mitochondrial Average	1.30833	3	1
Heat shock protein homolog SSE2 Average	1.30124	21	4
Alcohol dehydrogenase 3, mitochondrial Average	1.29249	6	2
Enolase 1 Average	1.29167	360	21
26S protease subunit RPT4 Average	1.291	13	3
NADPH-dependent aldehyde reductase ARI1 Average	1.29066	2	1
SEC14 cytosolic factor Average	1.28943	3	2
Dynamin-like GTPase MGM1, mitochondrial Average	1.28939	4	4
Uncharacterized transcriptional regulatory protein YLR278C Average	1.28825	2	2
Small glutamine-rich tetratricopeptide repeat-containing protein 2 Average	1.28672	4	2
Heat shock protein STI1 Average	1.28249	25	7
Malate dehydrogenase, peroxisomal Average	1.28148	9	4
Translation initiation factor eIF-2B subunit epsilon Average	1.28111	6	4
Cofilin Average	1.27984	14	3
26S protease regulatory subunit 6A Average	1.27868	2	1
Carboxypeptidase Y Average	1.27817	7	1
Ribonucleoside-diphosphate reductase small chain 1 Average	1.27644	3	2
Central kinetochore subunit CTF19 Average	1.2763	2	1
Proteasome subunit beta type-4 Average	1.27349	3	2
Vacuolar protein sorting-associated protein 28 Average	1.27263	2	2
Arginine--tRNA ligase, cytoplasmic Average	1.2713	70	8
Uncharacterized protein YPR117W Average	1.27088	2	2
5-oxoprolinase Average	1.27087	2	1
Thioredoxin-1 Average	1.26937	9	2
Protein NSG2 Average	1.26935	2	1
Glutathione reductase Average	1.26266	2	1
Non-classical export protein 2 Average	1.26085	41	1
Kinetochore protein NUF2 Average	1.26071	2	1
FK506-binding protein 1 Average	1.25697	49	5
Vacuolar import and degradation protein 30 Average	1.25621	3	1
Actin-related protein 2/3 complex subunit 2 Average	1.25607	3	3
Uncharacterized GTP-binding protein OLA1 Average	1.25408	21	6
Phosphoglucomutase-3 Average	1.25096	2	1
G2/mitotic-specific cyclin-1 Average	1.24974	4	1
Glutamine--fructose-6-phosphate aminotransferase [isomerizing] Average	1.24912	3	2
U6 snRNA-associated Sm-like protein LSm6 Average	1.24892	2	1
Glucan 1,3-beta-glucosidase Average	1.2478	14	4
Vacuolar protein sorting-associated protein 1 Average	1.24579	20	9
Methionyl-tRNA formyltransferase, mitochondrial Average	1.2454	6	1
Aspartate aminotransferase, cytoplasmic Average	1.24489	3	3
Coatomer subunit beta' Average	1.24316	2	1
Probable serine/threonine-protein kinase KKQ8 Average	1.24313	3	2
Isocitrate dehydrogenase [NAD] subunit 2, mitochondrial Average	1.24191	6	3
Peroxiredoxin type-2 Average	1.24181	51	4
Dynamin-related protein DNM1 Average	1.24079	13	3
Putative uncharacterized protein YLR279W Average	1.23718	5	1
Uncharacterized protein YDR333C Average	1.23693	3	1
Enolase 2 Average	1.23689	90	6
Ubiquitin-conjugating enzyme E2 1 Average	1.23642	3	3
Glucose-signaling factor 2 Average	1.22821	6	4
Peroxiredoxin HYR1 Average	1.22711	2	1
Probable palmitoyltransferase AKR2 Average	1.22686	2	1
Uncharacterized protein YMR114C Average	1.22642	2	2
Aconitate hydratase, mitochondrial Average	1.22565	20	9
2-deoxy-glucose resistant protein 2 Average	1.22473	3	3
Succinyl-CoA ligase [ADP-forming] subunit beta, mitochondrial Average	1.22435	3	2
Inhibitory regulator protein IRA1 Average	1.22225	4	3
Dolichyl-phosphate-mannose--protein mannosyltransferase 2 Average	1.22023	9	1
Thioredoxin-2 Average	1.21936	3	1
Resistance to glucose repression protein 1 Average	1.21727	2	1
Phospholipid-transporting ATPase DNF2 Average	1.21679	4	3
26S proteasome regulatory subunit RPN5 Average	1.21626	6	3
Acetyl-CoA carboxylase, mitochondrial Average	1.21521	2	2
Uncharacterized protein YNR034W-A Average	1.21404	9	1
Peptidyl-prolyl cis-trans isomerase CPR6 Average	1.21015	2	2
Protein TBF1 Average	1.21007	2	1
Transcriptional acticator POG1 Average	1.20907	2	1
Pre-mRNA-splicing factor ATP-dependent RNA helicase PRP16 Average	1.20758	2	2
ATP synthase subunit 4, mitochondrial Average	1.20686	2	1
Uncharacterized protein YDR514C Average	1.20666	3	2
Regulator of Ty1 transposition protein 103 Average	1.20615	2	2
Coronin-like protein Average	1.20615	8	2
Eukaryotic initiation factor 4F subunit p150 Average	1.20566	4	2
Transketolase 1 Average	1.20427	69	15
Isoleucine--tRNA ligase, mitochondrial Average	1.20324	3	2
Putative ribosomal RNA methyltransferase Nop2 Average	1.20183	4	3
Regulation of enolase protein 1 Average	1.19964	2	2
Eukaryotic translation initiation factor 2 subunit gamma Average	1.19755	4	4
SCF-associated factor 1 Average	1.19639	4	1
tRNA (carboxymethyluridine(34)-5-O)-methyltransferase Average	1.19557	6	1
Superoxide dismutase [Cu-Zn] Average	1.19323	24	3
Probable cation-transporting ATPase 1 Average	1.19002	4	4
Factor arrest protein 10 Average	1.18893	3	3
Long-chain-fatty-acid--CoA ligase 4 Average	1.18855	6	4
Transcriptional modulator WTM1 Average	1.18661	3	1
AN1-type zinc finger protein YNL155W Average	1.18375	3	1
TPR repeat-containing protein YMR018W Average	1.18053	2	2
Flavoprotein-like protein YCP4 Average	1.18005	4	3
Nucleolar GTP-binding protein 1 Average	1.17841	4	1
Coatomer subunit alpha Average	1.177	8	4
Protein TAX4 Average	1.17662	2	1
Actin-binding protein Average	1.17462	13	6
Uncharacterized protein YJL049W Average	1.17304	5	1
Vacuolar-sorting protein SNF7 Average	1.17079	2	1
DNA repair protein RAD9 Average	1.17025	4	3
Pyruvate dehydrogenase E1 component subunit alpha, mitochondrial Average	1.17018	6	2
Succinyl-CoA ligase [ADP-forming] subunit alpha, mitochondrial Average	1.16929	4	2
PKHD-type hydroxylase TPA1 Average	1.16861	2	1
Ubiquitin-like protein SMT3 Average	1.16818	10	1
Nucleoporin NUP2 Average	1.1679	6	4
Putative uncharacterized protein YDL057W Average	1.16605	2	2
Glycogen [starch] synthase isoform 1 Average	1.16572	3	2
NAP1-binding protein Average	1.16436	3	2
Plasma membrane ATPase 1 Average	1.16396	128	11
RuvB-like protein 2 Average	1.16143	2	1
H/ACA ribonucleoprotein complex subunit 4 Average	1.16104	6	2
DNA-directed RNA polymerase II subunit RPB1 Average	1.15985	12	5
Protein HRB1 Average	1.15765	2	2
Rab GDP-dissociation inhibitor Average	1.15607	5	2
Sensitivity to high expression protein 10 Average	1.15586	4	2
Sphingolipid long chain base-responsive protein LSP1 Average	1.1554	16	6
Importin subunit beta-4 Average	1.15532	16	8
Amidophosphoribosyltransferase Average	1.15504	5	2
Fructose-bisphosphate aldolase Average	1.15481	180	12
Putative DNA helicase INO80 Average	1.15397	2	2
Altered inheritance of mitochondria protein 9, mitochondrial Average	1.15382	5	3
Regulatory protein MIG1 Average	1.15097	2	1
Vesicle-associated membrane protein-associated protein SCS2 Average	1.15092	2	1
Bud site selection protein 7 Average	1.15089	2	1
Uncharacterized protein YDR186C Average	1.15084	2	1
ATP synthase subunit gamma, mitochondrial Average	1.14837	3	3
Gamma-glutamyl phosphate reductase Average	1.14662	3	2
Valine--tRNA ligase, mitochondrial Average	1.14596	53	7
MAP kinase kinase kinase SSK2 Average	1.14332	5	4
Protein SPP41 Average	1.14235	3	3
Branched-chain-amino-acid aminotransferase, cytosolic Average	1.14033	2	2
Succinate dehydrogenase [ubiquinone] iron-sulfur subunit, mitochondrial Average	1.14013	3	2
Structural maintenance of chromosomes protein 4 Average	1.13978	2	2
Rab proteins geranylgeranyltransferase component A Average	1.13883	3	2
Protein AIM7 Average	1.13859	2	1
Chromatin structure-remodeling complex subunit RSC7 Average	1.13814	2	2
Proteasome chaperone 1 Average	1.13732	5	1
Multiprotein-bridging factor 1 Average	1.13642	10	3
DNA mismatch repair protein MSH6 Average	1.13605	2	2
Altered inheritance of mitochondria protein 43, mitochondrial Average	1.13561	2	1
ATP-dependent RNA helicase DOB1 Average	1.13558	6	4
Probable phospholipid-transporting ATPase NEO1 Average	1.13535	2	2
Histone H4 Average	1.13422	27	2
Reticulon-like protein 1 Average	1.1335	10	2
Sporulation protein RMD8 Average	1.13235	10	1
Eukaryotic translation initiation factor 5A-1 Average	1.13219	2	1
Protein FMP25, mitochondrial Average	1.13186	2	1
Transposon Ty1-A Gag polyprotein Average	1.13171	7	2
Cell division control protein 12 Average	1.13134	6	3
Cytochrome B pre-mRNA-processing protein 1 Average	1.13013	2	2
UPF0202 protein KRE33 Average	1.12963	11	5
Uncharacterized protein YBR259W Average	1.12929	2	2
Heat shock protein homolog SSE1 Average	1.12896	46	6
Sedoheptulose 1,7-bisphosphatase Average	1.12799	11	4
Isocitrate dehydrogenase [NAD] subunit 1, mitochondrial Average	1.12712	3	1
Glutamine--tRNA ligase Average	1.12668	23	7
Vacuolar fusion protein MON1 Average	1.12654	2	2
Proteasome subunit alpha type-2 Average	1.12561	5	2
Coatomer subunit gamma Average	1.12528	2	1
GTP-binding protein YPT7 Average	1.12513	5	2
Mitochondrial aspartate-glutamate transporter AGC1 Average	1.12446	3	3
Beige protein homolog 1 Average	1.12372	5	2
DNA repair and recombination protein RAD26 Average	1.12196	4	4
Sterol-4-alpha-carboxylate 3-dehydrogenase, decarboxylating Average	1.12116	3	2
6-phosphofructokinase subunit alpha Average	1.1198	37	10
Prefoldin subunit 5 Average	1.11886	2	1
5'-3' exoribonuclease 1 Average	1.11849	10	6
Uncharacterized protein YFR039C Average	1.11806	2	2
ATP-dependent permease MDL1, mitochondrial Average	1.11769	2	2
Uncharacterized protein YKL105C Average	1.11571	2	1
Mitochondrial respiratory chain complexes assembly protein YTA12 Average	1.11533	2	2
G1/S-specific cyclin CLN2 Average	1.11392	2	1
Uncharacterized protein YOR021C Average	1.11135	2	1
Protein FYV6 Average	1.11091	2	1
ATPase GET3 Average	1.11045	8	2
Uncharacterized protein YGR130C Average	1.10931	2	2
ATP-dependent helicase RRM3 Average	1.10722	5	4
Protein kinase MCK1 Average	1.10448	3	2
Calcium-transporting ATPase 2 Average	1.10389	3	1
Dihydrolipoyllysine-residue acetyltransferase component of pyruvate dehydrogenase complex, mitochondrial Average	1.1035	14	3
Ubiquitin-activating enzyme E1 1 Average	1.10324	14	5
Putative sulfate transporter YPR003C Average	1.10286	2	1
mRNA-binding protein PUF3 Average	1.10224	2	2
Long-chain-fatty-acid--CoA ligase 1 Average	1.10088	2	1
Mitochondrial translation optimization protein 1 Average	1.10061	3	1
Dolichol-phosphate mannosyltransferase Average	1.10005	7	4
Uncharacterized protein YLR049C Average	1.09994	8	2
Protein URA2 Average	1.09912	162	28
Glycerol-3-phosphate dehydrogenase [NAD(+)] 1 Average	1.09868	4	1
UPF0061 protein FMP40 Average	1.09761	2	1
Proteasome subunit alpha type-5 Average	1.09682	8	5
Nuclear transport factor 2 Average	1.09472	4	2
Carbon catabolite-derepressing protein kinase Average	1.09207	2	2
6-phosphofructokinase subunit beta Average	1.09094	58	12
UPF0160 protein YER156C Average	1.09052	8	2
Endoplasmic reticulum transmembrane protein 3 Average	1.08858	8	2
SVP1-like protein 2 Average	1.08715	3	2
tRNA (guanine(10)-N2)-methyltransferase Average	1.08641	2	2
Profilin Average	1.08517	2	2
GTPase-activating protein GYP7 Average	1.08506	3	1
Magnesium-activated aldehyde dehydrogenase, cytosolic Average	1.08477	92	10
Nascent polypeptide-associated complex subunit alpha Average	1.08447	6	3
Regulatory protein SWI4 Average	1.07905	5	2
tRNA (guanine(37)-N1)-methyltransferase Average	1.07854	2	2
Pyruvate decarboxylase isozyme 1 Average	1.07826	313	16
Kinetochore protein SLK19 Average	1.0774	2	2
Eukaryotic peptide chain release factor GTP-binding subunit Average	1.07695	2	2
U3 small nucleolar RNA-associated protein 10 Average	1.07695	3	3
C-8 sterol isomerase Average	1.07682	5	1
Serine/threonine-protein kinase TEL1 Average	1.07666	18	4
Glycine--tRNA ligase 1, mitochondrial Average	1.07561	58	9
ATP-dependent RNA helicase DBP6 Average	1.07558	2	2
ATP-dependent RNA helicase DBP2 Average	1.07484	3	2
Respiration factor 2 Average	1.07336	4	3
Proteasome component PUP2 Average	1.07263	6	4
LETM1 domain-containing protein YLH47, mitochondrial Average	1.06722	2	1
Pyridoxamine 5'-phosphate oxidase Average	1.06651	2	2
Pyruvate dehydrogenase E1 component subunit beta, mitochondrial Average	1.06579	22	5
Transposon Ty1-DR4 Gag-Pol polyprotein Average	1.06282	8	3
Protein GVP36 Average	1.06207	5	4
1,3-beta-glucanosyltransferase GAS5 Average	1.06132	5	2
Probable kynurenine--oxoglutarate transaminase BNA3 Average	1.0598	2	1
Acetyl-CoA acetyltransferase Average	1.0597	25	6
Truncated transposon Ty1-A Gag-Pol polyprotein Average	1.05964	4	3
Vacuolar membrane protein PEP5 Average	1.05689	7	2
Transcription initiation factor TFIID subunit 6 Average	1.05669	2	2
Bifunctional purine biosynthetic protein ADE5,7 Average	1.05644	17	4
ADP-ribosylation factor-binding protein GGA2 Average	1.0564	5	4
Nucleolar protein 58 Average	1.05547	17	4
Aspartate--tRNA ligase, cytoplasmic Average	1.05389	33	8
Tryptophan--tRNA ligase, cytoplasmic Average	1.05357	4	1
Protein ISD11 Average	1.05213	4	1
SWI5-dependent HO expression protein 4 Average	1.05085	2	2
H/ACA ribonucleoprotein complex non-core subunit NAF1 Average	1.04888	2	1
Mitochondrial protein import protein MAS5 Average	1.04831	5	3
Histone acetyltransferase SAS3 Average	1.04673	2	1
mRNA turnover protein 4 Average	1.04603	3	1
Protein UPS2, mitochondrial Average	1.04587	2	2
Uncharacterized protein YDL129W Average	1.04526	2	2
Lysophospholipase NTE1 Average	1.0441	3	3
Probable 1-acyl-sn-glycerol-3-phosphate acyltransferase Average	1.04362	2	2
Chitin synthase 1 Average	1.04222	2	2
Clathrin light chain Average	1.04063	2	1
Uncharacterized protein YER077C Average	1.04055	2	2
Sorbitol dehydrogenase 1 Average	1.04032	2	1
Activator of SKN7 protein 10 Average	1.03828	2	1
Low specificity L-threonine aldolase Average	1.03704	11	2
26S protease regulatory subunit 7 homolog Average	1.03566	9	4
DNA-directed RNA polymerase II subunit RPB4 Average	1.03487	2	2
Vacuolar acid trehalase Average	1.03484	2	2
Hsp70/Hsp90 co-chaperone CNS1 Average	1.03437	3	2
Clustered mitochondria protein 1 Average	1.03399	10	5
Methionine--tRNA ligase, cytoplasmic Average	1.03381	7	2
Protein SPA2 Average	1.03263	2	2
Oligomycin resistance ATP-dependent permease YOR1 Average	1.03241	2	1
Phosphatidylinositol transfer protein CSR1 Average	1.0324	3	2
Phosphatidic acid phosphohydrolase 1 Average	1.03237	4	2
ATP-dependent RNA helicase DHH1 Average	1.03223	2	2
Poly(A) polymerase Average	1.03148	2	2
Exportin-T Average	1.03024	2	2
NADPH-dependent alpha-keto amide reductase Average	1.02951	2	1
Protein NNF2 Average	1.02826	3	2
Eukaryotic translation initiation factor 3 subunit C Average	1.02779	9	2
Protein TOS2 Average	1.02762	4	2
Accumulates dyads protein 3 Average	1.02716	3	2
Guanylate kinase Average	1.02682	7	1
Alcohol dehydrogenase 1 Average	1.02658	242	15
1,3-beta-glucan synthase component FKS1 Average	1.02641	6	5
Cell division control protein 53 Average	1.02551	3	3
ATP-dependent RNA helicase DBP10 Average	1.02401	2	1
Myosin light chain 1 Average	1.02383	6	2
DNA mismatch repair protein MLH3 Average	1.02354	2	2
Protein PES4 Average	1.02292	3	2
Translation machinery-associated protein 22 Average	1.02229	2	1
UTP--glucose-1-phosphate uridylyltransferase Average	1.02212	39	12
Probable ATP-dependent permease Average	1.02071	4	3
Transcriptional regulatory protein UME1 Average	1.01942	4	3
La protein homolog Average	1.01939	3	3
Proteasome component C7-alpha Average	1.01887	3	1
Serine/threonine-protein phosphatase 4 regulatory subunit 2 Average	1.01856	4	1
Phenylalanine--tRNA ligase beta subunit Average	1.01801	17	6
Translationally-controlled tumor protein homolog Average	1.01797	9	3
GTP-binding protein YPT6 Average	1.01759	3	1
ATP-dependent molecular chaperone HSC82 Average	1.01643	257	20
Eukaryotic translation initiation factor 5 Average	1.01626	7	4
T-complex protein 1 subunit beta Average	1.01593	22	5
26S protease regulatory subunit 8 homolog Average	1.01587	2	2
Protein PCF11 Average	1.01455	2	2
Eukaryotic translation initiation factor 5B Average	1.01449	14	5
ERAD-associated E3 ubiquitin-protein ligase component HRD3 Average	1.01352	4	1
RNA annealing protein YRA1 Average	1.01177	12	4
Vacuolar-sorting protein BRO1 Average	1.01152	3	2
Anaphase-promoting complex subunit 1 Average	1.01033	2	2
Myosin-1 Average	1.00929	2	1
Cell division control protein 4 Average	1.00929	2	2
FACT complex subunit POB3 Average	1.00842	4	3
Peroxiredoxin TSA1 Average	1.0081	54	4
Spindle pole body-associated protein CIK1 Average	1.00783	3	2
Telomere length regulator protein RIF1 Average	1.00563	2	2
Clathrin heavy chain Average	1.00548	3	3
Chorismate mutase Average	1.00544	5	2
Folic acid synthesis protein FOL1 Average	1.00521	2	2
ATP-dependent RNA helicase DED1 Average	1.0043	19	4
Sphingolipid long chain base-responsive protein PIL1 Average	1.0039	26	3
T-complex protein 1 subunit delta Average	1.00209	10	4
Putative redox protein FMP46, mitochondrial Average	1.0015	3	1
Proteasome subunit alpha type-3 Average	1.00061	3	1
Increased rDNA silencing protein 4 Average	1.00059	2	2
T-complex protein 1 subunit theta Average	1.00055	4	2
Transaldolase Average	0.999601	26	6
T-complex protein 1 subunit epsilon Average	0.998799	5	3
Phosphoinositide phosphatase SAC1 Average	0.998725	2	1
Elongation of fatty acids protein 2 Average	0.997787	2	2
Uncharacterized GTP-binding protein YDR336W Average	0.997127	5	2
Uncharacterized protein YGR126W Average	0.995843	9	1
Translational activator GCN1 Average	0.995813	10	6
Elongation factor 1-gamma 1 Average	0.995455	7	3
Protein ERP1 Average	0.995453	2	2
ATP-dependent helicase ULS1 Average	0.993781	2	2
Elongator complex protein 3 Average	0.993617	6	3
Vacuolar protein-sorting-associated protein 46 Average	0.993011	3	2
26S proteasome regulatory subunit RPN1 Average	0.992527	2	2
Inactive deaminase YJL070C Average	0.992453	3	1
ATP-dependent RNA helicase DBP3 Average	0.991408	2	1
40S ribosomal protein S7-B Average	0.990301	5	1
Bifunctional purine biosynthesis protein ADE17 Average	0.989372	3	1
Midasin Average	0.989211	14	5
Ran GTPase-activating protein 1 Average	0.988612	2	1
Fatty acid synthase subunit beta Average	0.987911	98	17
Acetyl-CoA carboxylase Average	0.986163	32	10
Translation initiation factor RLI1 Average	0.983909	4	1
Putative proline--tRNA ligase YHR020W Average	0.982874	5	3
Spindle pole body component 110 Average	0.982747	6	3
Protein transport protein SEC31 Average	0.982553	16	6
Lanosterol 14-alpha demethylase Average	0.981322	5	3
Ornithine aminotransferase Average	0.980723	2	1
Alanine--tRNA ligase, mitochondrial Average	0.980418	32	13
WD repeat-containing protein PAC11 Average	0.980276	3	1
Serine/threonine-protein kinase PKH3 Average	0.980082	4	2
Acyl-CoA-binding protein Average	0.979701	3	1
Saccharolysin Average	0.979229	2	2
DNA topoisomerase 2 Average	0.978551	2	2
Eukaryotic translation initiation factor 3 subunit J Average	0.978222	4	2
Protein STB2 Average	0.977707	4	1
Ribosome biogenesis protein RPF2 Average	0.976947	2	1
Nucleolar protein 56 Average	0.975484	29	4
Cell wall protein ECM33 Average	0.975106	7	1
Mitochondrial import receptor subunit TOM22 Average	0.97462	2	1
Pre-mRNA-splicing factor ATP-dependent RNA helicase-like protein PRP2 Average	0.97305	2	2
Intermediate cleaving peptidase 55 Average	0.972236	2	2
Uncharacterized methyltransferase ABP140 Average	0.971385	3	1
DNA polymerase epsilon catalytic subunit A Average	0.971344	5	2
DNA polymerase epsilon subunit B Average	0.971066	2	2
Pyrroline-5-carboxylate reductase Average	0.970356	2	1
1,3-beta-glucanosyltransferase GAS1 Average	0.968503	12	3
T-complex protein 1 subunit alpha Average	0.968484	2	2
Aldehyde dehydrogenase 5, mitochondrial Average	0.967938	2	1
Probable alpha-1,6-mannosyltransferase MNN11 Average	0.966821	2	1
Mitochondrial DNA replication protein YHM2 Average	0.9665	2	1
Eukaryotic translation initiation factor 3 subunit A Average	0.964741	8	6
F-box protein COS111 Average	0.964516	10	1
Cysteine--tRNA ligase Average	0.964459	4	1
Altered inheritance of mitochondria protein 44 Average	0.962836	7	4
Structural protein MDM1 Average	0.960985	2	2
Actin Average	0.960945	34	8
T-complex protein 1 subunit eta Average	0.960189	5	2
Uncharacterized protein YLR154C-G Average	0.959846	2	2
Homoserine kinase Average	0.957707	16	4
Protein transport protein SSS1 Average	0.957252	9	2
Glycine--tRNA ligase 2 Average	0.955854	2	1
Origin recognition complex subunit 1 Average	0.95492	3	3
DnaJ-like chaperone JEM1 Average	0.954784	3	1
Protein SNQ2 Average	0.954744	2	1
ATPase expression protein 2, mitochondrial Average	0.954202	3	3
Histone H2A.1 Average	0.9536	7	2
Aspartokinase Average	0.953494	2	1
Uracil phosphoribosyltransferase Average	0.95341	10	2
Vacuolar amino acid transporter 7 Average	0.953374	2	1
Ubiquitin-conjugating enzyme E2 7 Average	0.95187	2	1
Adenylosuccinate lyase Average	0.950509	19	3
Uncharacterized protein YGR111W Average	0.950245	2	1
Exocyst complex component EXO84 Average	0.949792	2	2
COPII coat assembly protein SEC16 Average	0.949609	3	3
D-arabinono-1,4-lactone oxidase Average	0.948929	2	1
ATPase expression protein 3 Average	0.945883	3	3
Factor interacting with REF2 Average	0.94492	2	1
Proteasome subunit alpha type-6 Average	0.944009	2	2
RuvB-like protein 1 Average	0.943306	4	3
Pantoate--beta-alanine ligase Average	0.942858	2	2
DNA polymerase V Average	0.942839	4	3
Putative uncharacterized protein YCL042W Average	0.942335	5	1
Ingression protein 1 Average	0.941916	2	1
Transcriptional regulatory protein EDS1 Average	0.941531	5	4
Regulator of Ty1 transposition protein 105 Average	0.941129	2	2
Nuclear and cytoplasmic polyadenylated RNA-binding protein PUB1 Average	0.941126	15	4
Inosine-5'-monophosphate dehydrogenase 3 Average	0.94077	2	1
Inhibitory regulator protein BUD2/CLA2 Average	0.940712	2	2
Autophagy-related protein 2 Average	0.94064	5	3
Ribonucleoside-diphosphate reductase large chain 1 Average	0.940512	3	2
V-type proton ATPase subunit D Average	0.939719	4	1
High-affinity potassium transport protein Average	0.939603	6	1
Serine hydroxymethyltransferase, mitochondrial Average	0.939026	10	4
Threonine--tRNA ligase, cytoplasmic Average	0.938937	46	10
26S proteasome regulatory subunit RPN2 Average	0.93824	4	1
Vacuolar protein sorting-associated protein 70 Average	0.937668	2	1
Hexaprenyl pyrophosphate synthase, mitochondrial Average	0.937229	4	3
Casein kinase I homolog 2 Average	0.936834	2	2
Histone-lysine N-methyltransferase, H3 lysine-79 specific Average	0.936382	2	2
Ubiquitin carboxyl-terminal hydrolase 3 Average	0.936356	3	3
Protein SCP160 Average	0.934012	16	8
Mannose-6-phosphate isomerase Average	0.933111	20	7
Probable ATP-dependent RNA helicase DHR1 Average	0.932145	4	3
Protein SDA1 Average	0.932052	5	2
Aminopeptidase Y Average	0.930393	2	2
Adenylate kinase 1 Average	0.929609	35	5
U3 small nucleolar RNA-associated protein 9 Average	0.925945	2	1
N-terminal acetyltransferase B complex subunit MDM20 Average	0.92532	3	1
Sensitive to high expression protein 9, mitochondrial Average	0.925094	2	1
Elongation factor 3A Average	0.925057	125	16
Nuclear mRNA export protein THP1 Average	0.924786	5	1
Protein transport protein SEC24 Average	0.92398	2	1
V-type proton ATPase catalytic subunit A Average	0.921865	103	16
26S protease regulatory subunit 4 homolog Average	0.920078	3	3
Oxysterol-binding protein homolog 1 Average	0.919911	5	2
Peroxisomal targeting signal 2 receptor Average	0.919516	5	1
Spindle pole body component SPC42 Average	0.919111	2	2
60S ribosomal protein L31-A Average	0.918004	54	4
Ribosome-interacting GTPase 1 Average	0.917995	3	2
Phospholipid:diacylglycerol acyltransferase Average	0.917095	2	1
Bud site selection protein 8 Average	0.913722	3	2
PHO85 cyclin-6 Average	0.913598	3	1
T-complex protein 1 subunit gamma Average	0.913397	4	3
Uncharacterized protein YHR080C Average	0.911555	3	2
Protein EMP46 Average	0.910596	2	2
H/ACA ribonucleoprotein complex subunit 1 Average	0.90924	9	1
Mitochondrial distribution and morphology protein 38 Average	0.909025	2	2
Tricalbin-3 Average	0.908614	3	3
UPF0651 protein YPL107W, mitochondrial Average	0.908004	2	2
Protein SYG1 Average	0.9067	2	2
Probable phospholipid-transporting ATPase DNF3 Average	0.905645	2	1
V-type proton ATPase subunit a, vacuolar isoform Average	0.902897	7	4
V-type proton ATPase subunit C Average	0.902316	3	2
Phosphoribosylaminoimidazole carboxylase Average	0.902186	9	5
ADP-ribosylation factor GTPase-activating protein GLO3 Average	0.901899	3	2
Elongation factor 1-alpha Average	0.899453	292	16
40S ribosomal protein S30-A Average	0.899173	21	3
Tubulin alpha-3 chain Average	0.899026	4	2
60S ribosomal protein L23-A Average	0.898691	40	4
Vacuolar protein-sorting-associated protein 60 Average	0.898192	2	1
Kinesin-like protein KIP2 Average	0.897323	23	1
Fatty acid synthase subunit alpha Average	0.897039	45	13
Uridine kinase Average	0.896606	2	2
3-keto-steroid reductase Average	0.896604	3	1
Mitochondrial group I intron splicing factor CCM1 Average	0.896417	3	2
Histidine--tRNA ligase, mitochondrial Average	0.895526	6	2
Histidine permease Average	0.894841	2	2
tRNA pseudouridine synthase 1 Average	0.894553	2	1
Nucleolar pre-ribosomal-associated protein 1 Average	0.894385	2	2
Protein phosphatase 2C homolog 4 Average	0.894319	2	2
Protein SIS1 Average	0.892968	5	3
Nuclear protein STH1/NPS1 Average	0.891363	3	2
S-adenosylmethionine synthase 1 Average	0.890185	28	5
Ribonuclease P/MRP protein subunit RPP1 Average	0.889888	2	2
Vacuolar protein sorting-associated protein 45 Average	0.889437	2	1
Nucleoporin NUP188 Average	0.889139	4	2
Good for full DBP5 activity protein 2 Average	0.888865	2	2
rRNA biogenesis protein RRP5 Average	0.887107	9	6
Mitochondrial oxaloacetate transport protein Average	0.886716	2	2
Cell division control protein 10 Average	0.886206	2	2
U3 small nucleolar RNA-associated protein 14 Average	0.886185	2	1
Putative reductase 1 Average	0.884828	2	2
Inorganic phosphate transporter PHO84 Average	0.884778	3	1
Serine--tRNA ligase, cytoplasmic Average	0.884603	11	4
Asparagine-rich protein Average	0.88435	2	2
Metal resistance protein YCF1 Average	0.884169	2	1
Polyadenylate-binding protein, cytoplasmic and nuclear Average	0.883061	14	6
Heat shock protein SSA2 Average	0.881389	5	1
DNA-directed RNA polymerase I subunit RPA190 Average	0.879583	7	2
V-type proton ATPase subunit G Average	0.8792	3	1
Periodic tryptophan protein 1 Average	0.878511	5	1
40S ribosomal protein S1-B Average	0.878344	13	4
Inorganic pyrophosphatase Average	0.877884	29	7
60S ribosomal protein L26-B Average	0.877584	10	1
Structural maintenance of chromosomes protein 2 Average	0.875763	3	3
Eukaryotic translation initiation factor 4E Average	0.875369	5	2
Alpha-1,2 mannosyltransferase KTR1 Average	0.875005	3	2
C-1-tetrahydrofolate synthase, cytoplasmic Average	0.8746	22	8
Dihydrolipoyl dehydrogenase, mitochondrial Average	0.873736	2	1
Uncharacterized protein YGL036W Average	0.873241	2	1
RNA-binding protein MRN1 Average	0.873172	2	2
Coatomer subunit beta Average	0.873126	6	3
Ribosome biogenesis protein BRX1 Average	0.872592	4	1
Eukaryotic translation initiation factor 3 subunit G Average	0.872301	6	3
Mitochondrial nuclease Average	0.871987	2	1
Elongation factor 1-beta Average	0.871188	65	3
cAMP-dependent protein kinase regulatory subunit Average	0.870256	5	3
Hydroxymethylglutaryl-CoA synthase Average	0.869863	11	2
Tyrosine--tRNA ligase, cytoplasmic Average	0.86883	7	3
Gamma-glutamyltransferase Average	0.867977	5	2
Protein ZEO1 Average	0.86742	42	3
RHO1 GDP-GTP exchange protein 2 Average	0.867245	4	3
KRR1 small subunit processome component Average	0.866998	7	3
Uncharacterized protein YGR283C Average	0.866996	2	1
GTP-binding nuclear protein GSP1/CNR1 Average	0.866572	38	2
ATPase expression protein 1, mitochondrial Average	0.866388	2	2
Peroxisomal catalase A Average	0.865954	3	2
Ribonuclease P protein component, mitochondrial Average	0.861864	7	4
Dolichyl-diphosphooligosaccharide--protein glycosyltransferase subunit 1 Average	0.861586	2	1
Leucine--tRNA ligase, cytoplasmic Average	0.86099	36	14
Increased copper sensitivity protein 3 Average	0.860715	3	3
V-type proton ATPase subunit B Average	0.859819	21	6
Exosome complex component SKI6 Average	0.859348	3	2
DNA repair protein RAD34 Average	0.858934	4	2
GMP synthase [glutamine-hydrolyzing] Average	0.856453	44	7
Nucleoporin NUP159 Average	0.855964	2	2
ATP-dependent RNA helicase eIF4A Average	0.855419	87	5
Adenosylhomocysteinase Average	0.854416	35	4
ATP-dependent permease PDR10 Average	0.853187	5	3
Ribosome biogenesis protein RLP24 Average	0.851504	4	2
Repressible acid phosphatase Average	0.851376	4	2
Alanine/arginine aminopeptidase Average	0.85088	5	3
GPI mannosyltransferase 4 Average	0.850394	2	2
Serine/threonine-protein phosphatase 2B catalytic subunit A1 Average	0.84993	2	2
Probable E3 ubiquitin-protein ligase HUL5 Average	0.849733	2	2
Trehalose-phosphatase Average	0.84951	2	2
Ribosome-associated complex subunit SSZ1 Average	0.847165	20	4
Vacuolar transporter chaperone 4 Average	0.847033	8	1
Heat shock protein SSB2 Average	0.845505	25	1
Increased sodium tolerance protein 2 Average	0.844666	3	2
Kelch repeat-containing protein 3 Average	0.843794	5	2
40S ribosomal protein S19-A Average	0.842697	27	4
Serine/threonine-protein kinase PRR2 Average	0.842216	2	2
SNF1-activating kinase 1 Average	0.841832	4	3
Elongation factor Tu, mitochondrial Average	0.841425	4	2
Serine/threonine-protein kinase STE7 Average	0.841285	5	1
D-lactate dehydrogenase [cytochrome] 3 Average	0.840048	4	1
Cystathionine gamma-lyase Average	0.83952	8	2
Nuclear segregation protein BFR1 Average	0.839498	5	2
Nucleolar protein 3 Average	0.839452	3	2
Elongation factor 2 Average	0.839449	275	15
40S ribosomal protein S19-B Average	0.837907	56	5
Prohibitin-2 Average	0.83733	2	1
Subtilase-type proteinase RRT12 Average	0.83525	2	2
ATP-dependent bile acid permease Average	0.835074	2	1
RNA exonuclease NGL1 Average	0.833087	4	1
Actin cytoskeleton-regulatory complex protein SLA1 Average	0.832502	4	2
Probable phosphomutase PMU1 Average	0.83236	3	2
NuA3 HAT complex component NTO1 Average	0.831879	2	1
Protein FMP27, mitochondrial Average	0.830583	4	2
Epsin-3 Average	0.829487	3	1
Eukaryotic peptide chain release factor subunit 1 Average	0.829451	12	3
Putative mitochondrial carnitine O-acetyltransferase Average	0.829115	5	1
Cytochrome c oxidase protein 20, mitochondrial Average	0.829074	2	2
Cell division control protein 3 Average	0.828237	4	1
Protein AHC1 Average	0.827515	2	2
Chitin synthase 2 Average	0.827058	3	1
Heat shock protein SSB1 Average	0.826074	239	19
Tricalbin-1 Average	0.825902	4	2
Uncharacterized oxidoreductase YMR226C Average	0.825107	6	1
Deoxyhypusine hydroxylase Average	0.824647	10	2
SANT domain-containing protein 2 Average	0.823816	2	2
Uncharacterized membrane protein YPR109W Average	0.822797	2	1
60S ribosomal protein L36-A Average	0.821921	16	3
Cytochrome c oxidase subunit 2 Average	0.821297	2	1
Phosphoglucomutase-1 Average	0.819934	3	2
Anaphase-promoting complex subunit 4 Average	0.81909	2	2
FK506-binding nuclear protein Average	0.815832	2	1
Long-chain-fatty-acid--CoA ligase 3 Average	0.81529	2	1
Restriction of telomere capping protein 1 Average	0.814723	2	2
40S ribosomal protein S28-A Average	0.813853	2	2
Eukaryotic translation initiation factor 2 subunit beta Average	0.810035	5	2
Ribonucleoside-diphosphate reductase small chain 2 Average	0.809575	24	7
Pyruvate kinase 1 Average	0.807103	403	19
54S ribosomal protein L41, mitochondrial Average	0.805707	2	1
60S ribosomal protein L18-A Average	0.803681	42	9
Acyl carrier protein, mitochondrial Average	0.803399	3	2
Cell division cycle protein CDT1 Average	0.802126	2	1
Uncharacterized protein YOR389W Average	0.800381	10	2
Peroxisomal ATPase PEX1 Average	0.799258	3	2
Sister chromatid cohesion protein 2 Average	0.799109	3	2
60S ribosome subunit biogenesis protein NOP8 Average	0.798668	2	1
DNA replication ATP-dependent helicase/nuclease DNA2 Average	0.798069	5	3
Transcription elongation factor SPT5 Average	0.797953	3	2
Glucose-6-phosphate 1-epimerase Average	0.797723	4	1
K(+)/H(+) antiporter 1 Average	0.797636	3	3
60S ribosomal protein L43-A Average	0.79705	6	2
40S ribosomal protein S1-A Average	0.796046	117	10
ABC transporter ATP-binding protein ARB1 Average	0.795026	14	2
Adenylyltransferase and sulfurtransferase UBA4 Average	0.794837	2	1
[NU+] prion formation protein 1 Average	0.794504	7	4
Suppressor protein STM1 Average	0.793844	25	3
Putative protein lysine methyltransferase SET5 Average	0.791435	2	2
ATP synthase subunit f, mitochondrial Average	0.79125	2	1
40S ribosomal protein S0-A Average	0.78902	44	8
U3 small nucleolar RNA-associated protein 22 Average	0.787763	3	3
Phosphoribosylformylglycinamidine synthase Average	0.787218	18	8
Aromatic amino acid aminotransferase 2 Average	0.784639	2	1
40S ribosomal protein S22-A Average	0.782537	35	6
60S ribosomal protein L42-A Average	0.780996	38	4
H/ACA ribonucleoprotein complex subunit 3 Average	0.780929	7	2
Constitutive acid phosphatase Average	0.780466	3	2
C-1-tetrahydrofolate synthase, mitochondrial Average	0.7799	3	3
Superkiller protein 3 Average	0.777547	3	2
Proteasome subunit alpha type-1 Average	0.777089	3	2
Condensin complex subunit 3 Average	0.776931	4	4
C-5 sterol desaturase Average	0.776348	2	2
NADPH dehydrogenase 2 Average	0.774907	6	1
Pro-apoptotic serine protease NMA111 Average	0.774834	2	1
Histone H2B.1 Average	0.77238	58	2
Lethal(2) giant larvae protein homolog SRO7 Average	0.770829	2	2
Factor arrest protein 11 Average	0.769776	2	2
V-type proton ATPase subunit E Average	0.768848	18	4
60S ribosomal protein L19-A Average	0.76883	15	3
Eukaryotic translation initiation factor 4B Average	0.768358	20	3
Replication factor A protein 1 Average	0.766922	2	1
60S ribosomal protein L36-B Average	0.764313	32	4
Catabolic L-serine/threonine dehydratase Average	0.763974	3	2
RING finger protein ETP1 Average	0.763269	2	2
Nonsense-mediated mRNA decay protein 2 Average	0.762499	15	1
Serine/threonine-protein kinase Haspin homolog ALK2 Average	0.762362	6	2
Ubiquitin-40S ribosomal protein S31 Average	0.762192	31	6
60S ribosomal protein L8-B Average	0.758987	9	2
Inosine-5'-monophosphate dehydrogenase 4 Average	0.758545	3	2
40S ribosomal protein S5 Average	0.758083	83	6
Protein ATP12, mitochondrial Average	0.757296	3	1
40S ribosomal protein S24-A Average	0.751426	54	7
Uncharacterized protein YLR072W Average	0.751421	2	2
Pre-mRNA-processing protein PRP40 Average	0.750334	2	2
(DL)-glycerol-3-phosphatase 1 Average	0.74992	30	5
40S ribosomal protein S26-B Average	0.749101	4	1
Elongation factor 1-gamma 2 Average	0.74897	55	9
Ribonuclease Z Average	0.748708	2	2
Myosin-3 Average	0.748056	3	2
Protein MAK32 Average	0.747128	4	1
Uncharacterized protein SLP1 Average	0.746559	2	2
Bypass of stop codon protein 5 Average	0.745173	3	2
40S ribosomal protein S26-A Average	0.745157	51	3
60S acidic ribosomal protein P2-beta Average	0.742762	6	2
60S ribosomal protein L14-B Average	0.741834	5	1
Nucleolar complex protein 2 Average	0.74136	2	1
Glycolipid 2-alpha-mannosyltransferase Average	0.74124	9	4
60S ribosomal protein L10 Average	0.741041	57	7
Replication factor C subunit 2 Average	0.740415	13	1
Cystathionine beta-synthase Average	0.740116	34	6
Glutamate synthase [NADH] Average	0.739635	5	3
60S ribosomal protein L4-A Average	0.739154	32	10
RNA-binding protein SRO9 Average	0.738503	2	1
Acetyl-coenzyme A synthetase 2 Average	0.734744	7	1
GU4 nucleic-binding protein 1 Average	0.734417	21	5
Probable aconitate hydratase 2 Average	0.734066	3	2
40S ribosomal protein S7-A Average	0.734015	10	5
Vacuolar morphogenesis protein 7 Average	0.733534	2	1
Phosphatidate cytidylyltransferase Average	0.732226	16	1
60S ribosomal protein L28 Average	0.731988	14	2
Alanine--glyoxylate aminotransferase 1 Average	0.729528	2	1
Eukaryotic translation initiation factor 2 subunit alpha Average	0.72763	3	2
ADP-ribose pyrophosphatase Average	0.725644	2	1
Zuotin Average	0.725103	8	4
Nuclear fusion protein BIK1 Average	0.722878	2	2
40S ribosomal protein S27-B Average	0.722128	26	3
Homoserine dehydrogenase Average	0.718534	18	5
Sulfate permease 2 Average	0.714746	2	2
Mannose-1-phosphate guanyltransferase Average	0.713034	27	6
Sporulation-regulated protein 28 Average	0.711182	4	2
40S ribosomal protein S0-B Average	0.710954	88	7
60S ribosomal protein L7-A Average	0.708604	111	10
Glutathione S-transferase omega-like 3 Average	0.706988	2	1
60S ribosomal protein L1-A Average	0.706681	21	5
60S acidic ribosomal protein P0 Average	0.706206	22	7
Peroxisomal long-chain fatty acid import protein 2 Average	0.70375	2	1
60S ribosomal protein L25 Average	0.703487	22	3
Nucleolar protein 13 Average	0.702692	3	1
Non-disjunction protein 1 Average	0.702245	3	1
Iron-sulfur assembly protein 2 Average	0.700646	8	1
60S ribosomal protein L37-A Average	0.700581	2	1
60S ribosomal protein L16-A Average	0.699064	55	12
40S ribosomal protein S27-A Average	0.69831	24	3
Guanine nucleotide-binding protein subunit beta-like protein Average	0.698256	59	6
60S ribosomal protein L32 Average	0.694769	43	8
40S ribosomal protein S6-A Average	0.693927	27	11
Inosine-5'-monophosphate dehydrogenase 2 Average	0.692546	5	2
GTP-binding protein YPT1 Average	0.691861	5	2
40S ribosomal protein S4-A Average	0.691058	168	10
40S ribosomal protein S16-A Average	0.687234	112	6
Methionine aminopeptidase 1 Average	0.687213	2	2
Exocyst complex component SEC10 Average	0.68714	2	2
Protein ORM1 Average	0.685832	3	1
ATP-dependent RNA helicase SUB2 Average	0.684459	7	2
Importin subunit beta-3 Average	0.683786	3	2
High-osmolarity-induced transcription protein 1 Average	0.683552	3	2
60S ribosomal protein L5 Average	0.68058	90	9
Uridylate kinase Average	0.676044	3	1
Serine/threonine-protein kinase KIN28 Average	0.675386	2	1
40S ribosomal protein S8-A Average	0.671596	32	4
Glutamate--tRNA ligase, cytoplasmic Average	0.670855	45	11
60S ribosomal protein L2-A Average	0.670134	26	4
DNA-directed RNA polymerase II subunit RPB2 Average	0.669826	6	5
Pre-mRNA-splicing helicase BRR2 Average	0.669066	10	2
60S ribosomal protein L26-A Average	0.668374	46	7
Peroxisomal membrane protein PEX17 Average	0.667742	2	2
Aminopeptidase 2, mitochondrial Average	0.667716	3	2
Pore membrane protein of 33 kDa Average	0.665716	2	1
Phenylalanine--tRNA ligase alpha subunit Average	0.664529	4	3
Cys-Gly metallodipeptidase DUG1 Average	0.66425	4	2
40S ribosomal protein S9-B Average	0.663505	46	6
40S ribosomal protein S11-A Average	0.659515	13	4
Single-stranded DNA-binding protein RIM1, mitochondrial Average	0.658734	3	1
40S ribosomal protein S12 Average	0.657331	23	2
Replication factor A protein 2 Average	0.657011	3	2
Methyltransferase OMS1, mitochondrial Average	0.656293	3	2
60S ribosomal protein L8-A Average	0.65554	109	11
40S ribosomal protein S2 Average	0.652669	72	7
60S ribosomal protein L35-A Average	0.650926	24	4
54S ribosomal protein L32, mitochondrial Average	0.649612	2	1
60S ribosomal protein L15-A Average	0.647334	29	7
Protein RED1 Average	0.647047	2	2
Stress response protein NST1 Average	0.646344	2	2
26S protease regulatory subunit 6B homolog Average	0.64502	3	2
60S ribosomal protein L3 Average	0.640637	87	13
Protein SST2 Average	0.640396	2	1
A1 cistron-splicing factor AAR2 Average	0.64012	3	1
Transcription initiation factor IIF subunit beta Average	0.637638	2	1
60S ribosomal protein L13-B Average	0.636221	27	4
60S ribosomal protein L7-B Average	0.635837	4	1
ARF guanine-nucleotide exchange factor 2 Average	0.634104	2	2
Dipeptidyl aminopeptidase A Average	0.632061	2	2
Protein BZZ1 Average	0.629095	2	2
40S ribosomal protein S18-A Average	0.624537	44	5
Serine/threonine-protein kinase GCN2 Average	0.620445	2	1
40S ribosomal protein S14-B Average	0.6187	35	3
40S ribosomal protein S25-B Average	0.6172	10	5
Ras-related protein SEC4 Average	0.613115	6	2
Cruciform DNA-recognizing protein 1 Average	0.610396	2	1
60S ribosomal protein L38 Average	0.608898	32	3
Pre-mRNA-splicing factor ATP-dependent RNA helicase PRP43 Average	0.608048	2	2
40S ribosomal protein S9-A Average	0.600892	52	10
60S ribosomal protein L12-A Average	0.598821	80	6
Transcriptional activator ARO80 Average	0.597586	2	1
40S ribosomal protein S28-B Average	0.597411	6	1
40S ribosomal protein S21-A Average	0.596927	51	3
Histone-lysine N-methyltransferase, H3 lysine-4 specific Average	0.593554	2	1
Acetyl-coenzyme A synthetase 1 Average	0.593498	3	2
60S ribosomal protein L13-A Average	0.593252	25	7
60S ribosomal protein L9-A Average	0.591981	42	4
Ubiquitin-60S ribosomal protein L40 Average	0.590003	22	3
Phosphomannomutase Average	0.584683	9	3
Ribosome assembly protein RRB1 Average	0.584309	2	1
40S ribosomal protein S25-A Average	0.583785	23	4
Protein CSF1 Average	0.581356	2	2
Protein AST1 Average	0.580542	4	3
Acyl-CoA desaturase 1 Average	0.579823	4	1
Endo-1,3(4)-beta-glucanase 2 Average	0.57837	2	2
40S ribosomal protein S13 Average	0.577914	82	8
60S ribosomal protein L17-A Average	0.576971	17	6
60S ribosomal protein L6-B Average	0.574737	67	4
40S ribosomal protein S29-A Average	0.571373	4	2
CCR4-NOT transcriptional complex subunit CAF120 Average	0.565012	2	2
Putative uncharacterized protein YFR056C Average	0.564745	4	2
Protein HUA2 Average	0.563872	2	1
60S ribosomal protein L24-A Average	0.563833	15	4
40S ribosomal protein S20 Average	0.558537	24	4
Cytochrome B translational activator protein CBS2 Average	0.556005	4	3
Cell division control protein 11 Average	0.555685	2	1
40S ribosomal protein S3 Average	0.55483	112	11
Adenosylmethionine-8-amino-7-oxononanoate aminotransferase Average	0.554701	2	2
60S ribosomal protein L27-A Average	0.554657	15	5
40S ribosomal protein S23-A Average	0.554657	60	8
40S ribosomal protein S17-A Average	0.554467	10	3
60S ribosomal protein L11-A Average	0.553057	18	5
Vacuolar protein sorting-associated protein 30 Average	0.544549	34	1
RNA polymerase-associated protein CTR9 Average	0.544061	3	1
60S ribosomal protein L34-A Average	0.541806	12	4
60S ribosomal protein L33-A Average	0.533754	27	5
40S ribosomal protein S14-A Average	0.532306	28	2
Adenylate cyclase Average	0.529234	3	2
60S acidic ribosomal protein P2-alpha Average	0.525294	2	1
Protein MGA2 Average	0.517036	3	1
60S ribosomal protein L22-A Average	0.512718	3	2
60S ribosomal protein L20-A Average	0.511779	56	6
60S ribosomal protein L16-B Average	0.506739	47	6
60S ribosomal protein L21-A Average	0.500299	36	7
60S ribosomal protein L33-B Average	0.494128	31	4
60S ribosomal protein L14-A Average	0.488467	72	6
DNA-directed RNA polymerases I and III subunit RPAC1 Average	0.484507	2	1
40S ribosomal protein S10-B Average	0.469498	11	2
Translation initiation factor eIF-2B subunit beta Average	0.447204	2	1
60S ribosomal protein L34-B Average	0.415567	9	6
U6 snRNA-associated Sm-like protein LSm8 Average	0.415441	3	1
60S ribosomal protein L6-A Average	0.407958	55	9
Pre-mRNA-splicing factor 8 Average	0.333512	2	2
Ribosome assembly protein 4 Average	0.328516	2	2
Oxysterol-binding protein homolog 3 Average	0.304917	2	1
Ino eighty subunit 2 Average	0.28799	4	2
37S ribosomal protein MRP17, mitochondrial Average	0.199362	3	2
U3 small nucleolar RNA-associated protein 25 Average	0.137054	2	2
Altered inheritance rate of mitochondria protein 25 Average	0.12949	2	2
SPS-sensor component SSY1 Average	0.0610003	2	1
Type 2A phosphatase-associated protein 42 Average	3.89912	1	1
3-hydroxyanthranilate 3,4-dioxygenase Average	3.36785	1	1
Target of rapamycin complex 2 subunit BIT61 Average	3.0594	1	1
Ammonium transporter MEP2 Average	3.03368	1	1
Putative mitochondrial ribosomal protein YNL122C Average	2.88307	1	1
DNA topoisomerase 2-associated protein PAT1 Average	2.85823	1	1
Probable E3 ubiquitin-protein ligase HUL4 Average	2.72894	1	1
ADP,ATP carrier protein 1 Average	2.69281	1	1
DnaJ-like protein 1 Average	2.66953	1	1
Glutaredoxin-2, mitochondrial Average	2.6501	1	1
Peroxiredoxin TSA2 Average	2.63043	1	1
Protoheme IX farnesyltransferase, mitochondrial Average	2.6049	1	1
tRNA-dihydrouridine(20) synthase [NAD(P)+] Average	2.59187	1	1
Protein SSH4 Average	2.5228	1	1
ATP-dependent RNA helicase DRS1 Average	2.50131	1	1
UBX domain-containing protein 3 Average	2.49082	1	1
Transcriptional activator protein DAL81 Average	2.36897	1	1
Centromere DNA-binding protein complex CBF3 subunit C Average	2.34953	1	1
Protein FAF1 Average	2.31209	1	1
DNA repair protein RAD10 Average	2.29386	1	1
Transcription elongation factor S-II Average	2.27535	1	1
Altered inheritance of mitochondria protein 18, mitochondrial Average	2.27407	1	1
Cargo-transport protein YPP1 Average	2.18351	1	1
Phosphatidylserine decarboxylase proenzyme 1, mitochondrial Average	2.15585	1	1
3,4-dihydroxy-2-butanone 4-phosphate synthase Average	2.14363	1	1
12 kDa heat shock protein Average	2.13948	1	1
Alpha,alpha-trehalose-phosphate synthase [UDP-forming] 56 kDa subunit Average	2.12564	1	1
NADH-cytochrome b5 reductase 2 Average	2.11332	1	1
Heat shock protein SSQ1, mitochondrial Average	2.10464	1	1
Probable serine/threonine-protein kinase KCC4 Average	2.08359	1	1
Phosphatidylinositol 4,5-bisphosphate 5-phosphatase INP51 Average	2.07882	1	1
Histone acetyltransferase GCN5 Average	2.07732	1	1
Bypass of stop codon protein 6 Average	2.07294	1	1
Anaphase-promoting complex subunit 11 Average	2.03039	1	1
Fatty aldehyde dehydrogenase HFD1 Average	2.02916	1	1
Putative uncharacterized protein YER097W Average	2.01481	1	1
Homeobox protein TOS8 Average	1.99254	1	1
Deoxyribodipyrimidine photo-lyase, mitochondrial Average	1.99089	1	1
Isocitrate dehydrogenase [NADP] Average	1.98724	1	1
mRNA 3'-end-processing protein RNA15 Average	1.95566	1	1
Protein PLM2 Average	1.92235	1	1
Uncharacterized oxidoreductase YKL071W Average	1.91495	1	1
Protein NIP100 Average	1.89671	1	1
Hsp90 co-chaperone HCH1 Average	1.88699	1	1
Peroxisomal membrane protein PEX30 Average	1.87025	1	1
Probable transcription repressor protein RGM1 Average	1.8474	1	1
Inositol hexakisphosphate kinase 1 Average	1.84472	1	1
ATF/CREB activator 2 Average	1.84232	1	1
Methionine--tRNA ligase, mitochondrial Average	1.84209	1	1
Eukaryotic translation initiation factor 3 subunit B Average	1.80322	1	1
ATP-dependent permease AUS1 Average	1.80284	1	1
Zinc finger protein STP3 Average	1.801	1	1
Copper transport protein 86 Average	1.79857	1	1
SERF-like protein YDL085C-A Average	1.79586	1	1
Serine/threonine-protein kinase KIN2 Average	1.78846	1	1
Glycerol kinase Average	1.78795	1	1
Sister chromatid cohesion protein PDS5 Average	1.76013	1	1
Invertase 2 Average	1.75634	1	1
Translocation protein SEC62 Average	1.7427	1	1
Uncharacterized protein YML079W Average	1.73287	1	1
Ubiquitin-like-specific protease 1 Average	1.72548	1	1
DNA repair protein XRS2 Average	1.724	1	1
Calcium-channel protein CCH1 Average	1.72393	1	1
Succinate dehydrogenase [ubiquinone] cytochrome b subunit, mitochondrial Average	1.7205	1	1
Hsp90 co-chaperone AHA1 Average	1.71964	1	1
60S acidic ribosomal protein P1-alpha Average	1.69987	1	1
Importin beta-like protein KAP120 Average	1.69323	1	1
Putative guanine nucleotide exchange factor YLL017W Average	1.69131	1	1
Serine/threonine protein kinase KIN1 Average	1.68856	1	1
Regulator of rDNA transcription protein 13 Average	1.68825	1	1
Exosome complex exonuclease DIS3 Average	1.68815	1	1
Spindle pole body component SPC97 Average	1.67602	1	1
Arrestin-related trafficking adapter 3 Average	1.67538	1	1
mRNA transport regulator MTR10 Average	1.67509	1	1
Protein PER1 Average	1.66969	1	1
Threo-3-hydroxyaspartate ammonia-lyase Average	1.66852	1	1
Putative glycosyltransferase HOC1 Average	1.6627	1	1
Ceramide synthase subunit LIP1 Average	1.66114	1	1
RNA polymerase I-specific transcription initiation factor RRN5 Average	1.65778	1	1
NADH dehydrogenase [ubiquinone] complex I, assembly factor 7 homolog Average	1.65749	1	1
Conserved oligomeric Golgi complex subunit 2 Average	1.65469	1	1
Protein SRL3 Average	1.64358	1	1
40S ribosomal protein S21-B Average	1.62328	1	1
Malate dehydrogenase, cytoplasmic Average	1.61827	1	1
Uncharacterized ATP-dependent helicase IRC5 Average	1.59878	1	1
Protein ECM5 Average	1.59589	1	1
Protein dopey Average	1.59355	1	1
Repressible alkaline phosphatase Average	1.57435	1	1
Carbamoyl-phosphate synthase arginine-specific small chain Average	1.57115	1	1
ABC transporter ATP-binding protein/permease PDR18 Average	1.56553	1	1
Ubiquitin carboxyl-terminal hydrolase 2 Average	1.56378	1	1
Putative uncharacterized protein YDR510C-A Average	1.56101	1	1
Protein transport protein SEC23 Average	1.55167	1	1
J protein JJJ2 Average	1.54868	1	1
RNA exonuclease 1 Average	1.54857	1	1
vacuole-related protein 17 Average	1.54745	1	1
Polyubiquitin Average	1.543	1	1
Protein SPH1 Average	1.54283	1	1
Putative uncharacterized protein MBB1 Average	1.54167	1	1
Uncharacterized protein YDL176W Average	1.54133	1	1
NAD-dependent malic enzyme, mitochondrial Average	1.53608	1	1
Vacuole morphology and inheritance protein 14 Average	1.53403	1	1
Homocysteine S-methyltransferase 2 Average	1.53345	1	1
NADP-dependent alcohol dehydrogenase 6 Average	1.53069	1	1
tRNA (cytidine(32)-2'-O)-methyltransferase non-catalytic subunit TRM732 Average	1.52177	1	1
Regulatory protein MIG2 Average	1.52092	1	1
Uncharacterized protein YDL009C Average	1.52092	1	1
Uncharacterized membrane protein YMR253C Average	1.5197	1	1
COMPASS component SPP1 Average	1.51056	1	1
Uncharacterized vacuolar membrane protein YJR054W Average	1.50946	1	1
Transcription initiation factor TFIID subunit 14 Average	1.50853	1	1
Dihydrolipoyllysine-residue succinyltransferase component of 2-oxoglutarate dehydrogenase complex, mitochondrial Average	1.50644	1	1
Ribosomal N-lysine methyltransferase 4 Average	1.50499	1	1
Uncharacterized protein YLR211C Average	1.49713	1	1
Factor arrest protein 8 Average	1.49225	1	1
Ribosome assembly protein 1 Average	1.49045	1	1
Structural maintenance of chromosomes protein 3 Average	1.49028	1	1
Succinate-semialdehyde dehydrogenase [NADP(+)] Average	1.4898	1	1
Transcription elongation factor SPT6 Average	1.48866	1	1
Fork head protein homolog 2 Average	1.48379	1	1
Kinesin-like protein KAR3 Average	1.48204	1	1
tRNA (guanosine(18)-2'-O)-methyltransferase Average	1.47903	1	1
Succinate dehydrogenase [ubiquinone] cytochrome b small subunit, mitochondrial Average	1.47875	1	1
AP-1-like transcription factor YAP8 Average	1.47754	1	1
Anaphase-promoting complex subunit CDC16 Average	1.47186	1	1
Uncharacterized protein YKL027W Average	1.46906	1	1
Mitochondrial metal transporter 1 Average	1.46764	1	1
Phosphoinositide 3-phosphatase Average	1.46526	1	1
54S ribosomal protein L28, mitochondrial Average	1.4648	1	1
ATP-dependent (S)-NAD(P)H-hydrate dehydratase Average	1.46347	1	1
Inactive diphosphatase DCS2 Average	1.46084	1	1
RNA polymerase I-specific transcription initiation factor RRN6 Average	1.45995	1	1
Sorting assembly machinery 37 kDa subunit Average	1.45385	1	1
Kinetochore-associated protein CNN1 Average	1.45307	1	1
NADPH-dependent aldose reductase GRE3 Average	1.45294	1	1
Uncharacterized protein YMR196W Average	1.4523	1	1
Mitochondrial import receptor subunit TOM40 Average	1.44983	1	1
SNF1 protein kinase subunit beta-1 Average	1.44972	1	1
54S ribosomal protein L8, mitochondrial Average	1.44891	1	1
Pre-mRNA-splicing factor NTR2 Average	1.44555	1	1
tRNA ligase Average	1.44268	1	1
Serine/threonine-protein kinase ENV7 Average	1.43834	1	1
[PIN+] prion protein RNQ1 Average	1.43764	1	1
Hsp70 nucleotide exchange factor FES1 Average	1.43471	1	1
Probable DNA-binding protein SNT1 Average	1.4333	1	1
Alkaline ceramidase YDC1 Average	1.43292	1	1
Protein phosphatase PP2A regulatory subunit B Average	1.43049	1	1
UPF0641 membrane protein YHR140W Average	1.42996	1	1
ERAD-associated E3 ubiquitin-protein ligase DOA10 Average	1.42764	1	1
Fe-S cluster assembly protein DRE2 Average	1.42498	1	1
Uncharacterized protein IRC8 Average	1.41561	1	1
Synchronized import protein 1 Average	1.41242	1	1
Condensin complex subunit 1 Average	1.4107	1	1
Silent chromatin protein ESC1 Average	1.40669	1	1
Translation initiation factor eIF-2B subunit gamma Average	1.40119	1	1
Protein ERP2 Average	1.39995	1	1
TATA-binding protein-associated factor MOT1 Average	1.39868	1	1
37S ribosomal protein S24, mitochondrial Average	1.39724	1	1
E3 ubiquitin-protein ligase RSP5 Average	1.39535	1	1
DNA repair protein RAD5 Average	1.39434	1	1
Y' element ATP-dependent helicase protein 1 copy 1 Average	1.39301	1	1
Bud site selection protein 14 Average	1.39195	1	1
Uncharacterized protein YOR019W Average	1.38947	1	1
Chromatin assembly factor 1 subunit p90 Average	1.38795	1	1
Platinum sensitivity protein 3 Average	1.38473	1	1
Uncharacterized protein MRP8 Average	1.3834	1	1
Vacuolar amino acid transporter 1 Average	1.38339	1	1
Nitrogen permease regulator 3 Average	1.3828	1	1
Putative uncharacterized protein YOL114C Average	1.38279	1	1
Methylenetetrahydrofolate reductase 1 Average	1.38012	1	1
Putative 6-phosphofructo-2-kinase/fructose-2,6-bisphosphatase YLR345W Average	1.37877	1	1
Putative lipase YJR107W Average	1.37627	1	1
Uncharacterized protein YOL086W-A Average	1.37401	1	1
Very-long-chain 3-oxoacyl-CoA reductase Average	1.37189	1	1
Glucose starvation modulator protein 1 Average	1.3671	1	1
Ligase-interacting factor 1 Average	1.36467	1	1
Ferric/cupric reductase transmembrane component 2 Average	1.36432	1	1
UPF0655 protein YCR015C Average	1.36274	1	1
Isopentenyl-diphosphate Delta-isomerase Average	1.36039	1	1
Fork head protein homolog 1 Average	1.35826	1	1
Trehalose synthase complex regulatory subunit TPS3 Average	1.35654	1	1
Ankyrin repeat-containing protein YAR1 Average	1.35514	1	1
SIT4-associating protein SAP190 Average	1.35441	1	1
Protein SCD6 Average	1.35308	1	1
Uncharacterized peptidase YFR006W Average	1.35197	1	1
Cytoplasmic tRNA 2-thiolation protein 1 Average	1.35192	1	1
E3 ubiquitin-protein ligase listerin Average	1.34787	1	1
Phospholipase D1 Average	1.34767	1	1
Alpha-1,2-mannosyltransferase ALG9 Average	1.34682	1	1
Myosin tail region-interacting protein MTI1 Average	1.34637	1	1
UDP-N-acetylglucosamine transporter YEA4 Average	1.34154	1	1
HDA1 complex subunit 3 Average	1.34097	1	1
Protein STB5 Average	1.33723	1	1
Minichromosome maintenance protein 5 Average	1.33687	1	1
Uncharacterized endoplasmic reticulum membrane protein YJR015W Average	1.33482	1	1
54S ribosomal protein L38, mitochondrial Average	1.33437	1	1
Polynucleotide 5'-hydroxyl-kinase GRC3 Average	1.33298	1	1
Rho-GTPase-activating protein LRG1 Average	1.33233	1	1
Uncharacterized protein YKR011C Average	1.33157	1	1
Dehydrodolichyl diphosphate synthase RER2 Average	1.32933	1	1
Restriction of telomere capping protein 5 Average	1.3204	1	1
40S ribosomal protein S29-B Average	1.31898	1	1
Protein OS-9 homolog Average	1.3188	1	1
Putative uncharacterized protein YGR079W Average	1.31741	1	1
Translocation protein SEC72 Average	1.31564	1	1
Diacetyl reductase [(R)-acetoin forming] Average	1.31213	1	1
Protein MAM3 Average	1.31175	1	1
Phosducin-like protein 2 Average	1.3115	1	1
Phosphopantothenoylcysteine decarboxylase subunit VHS3 Average	1.31101	1	1
Telomere length regulation protein TEL2 Average	1.31074	1	1
LAS seventeen-binding protein 5 Average	1.3084	1	1
DNA repair and recombination protein RAD54 Average	1.30401	1	1
Phospho-2-dehydro-3-deoxyheptonate aldolase, phenylalanine-inhibited Average	1.30391	1	1
Pyruvate dehydrogenase complex protein X component, mitochondrial Average	1.30346	1	1
Uncharacterized ABC transporter ATP-binding protein/permease YOL075C Average	1.29732	1	1
rRNA-processing protein FYV7 Average	1.29465	1	1
Protein OPY1 Average	1.28664	1	1
Uncharacterized protein YMR187C Average	1.2855	1	1
Truncated non-functional calcium-binding mitochondrial carrier SAL1-1 Average	1.28289	1	1
Monopolin complex subunit MAM1 Average	1.28201	1	1
PAB-dependent poly(A)-specific ribonuclease subunit PAN2 Average	1.28005	1	1
Putative aldehyde dehydrogenase-like protein YHR039C Average	1.27929	1	1
Lon protease homolog, mitochondrial Average	1.27775	1	1
Transcription-associated protein 1 Average	1.2758	1	1
Autophagy protein 5 Average	1.27474	1	1
ISWI one complex protein 2 Average	1.27379	1	1
Transcription factor MBP1 Average	1.27373	1	1
54S ribosomal protein L4, mitochondrial Average	1.27296	1	1
Serine/threonine-protein kinase CLA4 Average	1.27057	1	1
Arrestin-related trafficking adapter 10 Average	1.26998	1	1
Small COPII coat GTPase SAR1 Average	1.26873	1	1
Pre-mRNA-splicing factor PRP46 Average	1.26826	1	1
Mitochondrial import inner membrane translocase subunit TIM8 Average	1.26753	1	1
DNA endonuclease SAE2 Average	1.26744	1	1
Probable quinone oxidoreductase Average	1.26641	1	1
Myosin-2 Average	1.26479	1	1
Uncharacterized protein YEL025C Average	1.26437	1	1
Something about silencing protein 4 Average	1.26431	1	1
Co-chaperone protein SBA1 Average	1.26337	1	1
Protein LDB18 Average	1.26286	1	1
D-3-phosphoglycerate dehydrogenase 2 Average	1.26012	1	1
Adenylate kinase 2 Average	1.25983	1	1
Elongator complex protein 2 Average	1.25562	1	1
Ubiquitin domain-containing protein DSK2 Average	1.25485	1	1
Autophagy-related protein 32 Average	1.25433	1	1
Vacuolar protein 8 Average	1.25422	1	1
Uncharacterized protein YER158C Average	1.25418	1	1
26S proteasome regulatory subunit RPN11 Average	1.25358	1	1
Putative serine/threonine-protein kinase YPL150W Average	1.25332	1	1
Glycerol uptake protein 1 Average	1.25194	1	1
Histone acetyltransferase type B catalytic subunit Average	1.25123	1	1
Protein BRE4 Average	1.24886	1	1
rRNA-processing protein FCF1 Average	1.24644	1	1
Actin-like protein ARP10 Average	1.24587	1	1
Protein SUE1, mitochondrial Average	1.24397	1	1
SIT4-associating protein SAP155 Average	1.24243	1	1
U4/U6 small nuclear ribonucleoprotein PRP3 Average	1.24064	1	1
Protein SKT5 Average	1.23872	1	1
Uncharacterized abhydrolase domain-containing protein YGR015C Average	1.23775	1	1
Mitochondrial import inner membrane translocase subunit TIM54 Average	1.23641	1	1
Mitochondrial import receptor subunit TOM20 Average	1.23378	1	1
Nuclear migration protein JNM1 Average	1.23339	1	1
Sporulation protein RMD1 Average	1.23031	1	1
U4/U6 snRNA-associated-splicing factor PRP24 Average	1.22778	1	1
Dynein light chain 1, cytoplasmic Average	1.22553	1	1
Dolichyl-diphosphooligosaccharide--protein glycosyltransferase subunit 3 Average	1.22399	1	1
Protein BSP1 Average	1.22394	1	1
Actin cytoskeleton-regulatory complex protein PAN1 Average	1.21831	1	1
Ubiquitin fusion degradation protein 1 Average	1.21727	1	1
Ribose-phosphate pyrophosphokinase 5 Average	1.21328	1	1
Origin recognition complex subunit 2 Average	1.21301	1	1
Uncharacterized protein YPL066W Average	1.21238	1	1
Fluconazole resistance protein 1 Average	1.21231	1	1
Protein ASI3 Average	1.2119	1	1
Fructose-2,6-bisphosphatase Average	1.2111	1	1
Peroxisomal membrane protein PEX14 Average	1.21109	1	1
Uncharacterized protein YKL075C Average	1.2107	1	1
Histone promoter control protein 2 Average	1.21059	1	1
Ribosomal RNA-processing protein 1 Average	1.20995	1	1
DNA repair protein RAD59 Average	1.20901	1	1
Vacuolar protein sorting-associated protein 4 Average	1.20827	1	1
General negative regulator of transcription subunit 2 Average	1.20711	1	1
DNA repair protein RAD2 Average	1.2047	1	1
Uncharacterized protein YKR078W Average	1.20301	1	1
Protein SPT3 Average	1.20202	1	1
Protein THO1 Average	1.20034	1	1
Zinc finger transcription factor YRR1 Average	1.19817	1	1
Spore wall maturation protein DIT1 Average	1.19752	1	1
Crossover junction endonuclease MUS81 Average	1.1963	1	1
Pre-mRNA-splicing factor SLU7 Average	1.19629	1	1
54S ribosomal protein L31, mitochondrial Average	1.1934	1	1
66 kDa U4/U6.U5 small nuclear ribonucleoprotein component Average	1.19173	1	1
Uncharacterized protein YLR177W Average	1.19064	1	1
V-type proton ATPase subunit a, Golgi isoform Average	1.1902	1	1
E3 ubiquitin-protein ligase UBR2 Average	1.18922	1	1
Protein SPT23 Average	1.18817	1	1
Dual specificity protein kinase YAK1 Average	1.18445	1	1
Shuttling pre-60S factor ECM1 Average	1.18332	1	1
Cytochrome b-c1 complex subunit 2, mitochondrial Average	1.18315	1	1
Low-affinity phosphate transporter PHO90 Average	1.18184	1	1
Actin cytoskeleton-regulatory complex protein END3 Average	1.17973	1	1
Exportin-1 Average	1.17889	1	1
mRNA-capping enzyme subunit beta Average	1.17453	1	1
Uncharacterized transcriptional regulatory protein TBS1 Average	1.17375	1	1
Adenylyl cyclase-associated protein Average	1.16963	1	1
Non-structural maintenance of chromosome element 3 Average	1.16943	1	1
Dolichyl-diphosphooligosaccharide--protein glycosyltransferase subunit SWP1 Average	1.16898	1	1
Trafficking protein particle complex II-specific subunit 65 Average	1.16876	1	1
ADIPOR-like receptor IZH2 Average	1.16828	1	1
Protein MUM3 Average	1.16672	1	1
NADPH--cytochrome P450 reductase Average	1.16441	1	1
Nuclear rim protein 1 Average	1.16351	1	1
54S ribosomal protein RML2, mitochondrial Average	1.15884	1	1
Peroxisomal membrane protein PEX31 Average	1.15819	1	1
54S ribosomal protein IMG2, mitochondrial Average	1.15765	1	1
U3 small nucleolar RNA-associated protein 6 Average	1.15724	1	1
Phosphatidate phosphatase APP1 Average	1.15713	1	1
Serine/threonine-protein kinase GIN4 Average	1.15659	1	1
37S ribosomal protein MRP2, mitochondrial Average	1.15651	1	1
U3 small nucleolar RNA-associated protein 12 Average	1.15629	1	1
DNA-directed RNA polymerases I, II, and III subunit RPABC1 Average	1.15605	1	1
DNA damage-inducible protein DIN7 Average	1.15578	1	1
Protein SLF1 Average	1.15451	1	1
Mitochondrial import inner membrane translocase subunit TIM13 Average	1.15336	1	1
Asparagine-rich zinc finger protein AZF1 Average	1.15313	1	1
Trafficking protein particle complex II-specific subunit 120 Average	1.15295	1	1
Pyruvate decarboxylase isozyme 2 Average	1.14765	1	1
Mediator of RNA polymerase II transcription subunit 13 Average	1.14593	1	1
Carboxylic acid transporter protein homolog Average	1.14249	1	1
Kinetochore-associated protein DSN1 Average	1.14018	1	1
Mediator of replication checkpoint protein 1 Average	1.13894	1	1
Protein MLP1 Average	1.13864	1	1
UBX domain-containing protein 4 Average	1.13793	1	1
Single-strand telomeric DNA-binding protein GBP2 Average	1.13748	1	1
CDP-diacylglycerol--glycerol-3-phosphate 3-phosphatidyltransferase Average	1.1329	1	1
Uncharacterized protein YJR039W Average	1.13277	1	1
Uncharacterized protein YNR048W Average	1.13057	1	1
Ubiquitin carboxyl-terminal hydrolase 6 Average	1.12543	1	1
Pre-mRNA-splicing ATP-dependent RNA helicase PRP28 Average	1.12376	1	1
Uncharacterized membrane protein YGR149W Average	1.1234	1	1
Ubiquitin carboxyl-terminal hydrolase 14 Average	1.12114	1	1
Putative transcription factor PHD1 Average	1.12013	1	1
Nucleus-vacuole junction protein 1 Average	1.12005	1	1
Uncharacterized ATP-dependent helicase IRC20 Average	1.11748	1	1
Ribosomal RNA-processing protein 12 Average	1.11679	1	1
N-acetyltransferase SLI1 Average	1.11532	1	1
Nucleoporin NUP1 Average	1.11528	1	1
Probable NADPH:adrenodoxin oxidoreductase, mitochondrial Average	1.11392	1	1
tRNA-specific adenosine deaminase 1 Average	1.111	1	1
Anti-silencing protein 2 Average	1.11018	1	1
Grand meiotic recombination cluster protein 2 Average	1.1077	1	1
Nucleolar protein 19 Average	1.10699	1	1
Anaphase-promoting complex subunit DOC1 Average	1.10565	1	1
Pre-mRNA-splicing factor PRP21 Average	1.10489	1	1
NADPH-dependent 1-acyldihydroxyacetone phosphate reductase Average	1.10262	1	1
Rho-type GTPase-activating protein 1 Average	1.10205	1	1
Acyl-coenzyme A oxidase Average	1.10181	1	1
Peptide chain release factor 1, mitochondrial Average	1.09969	1	1
Mitochondrial import inner membrane translocase subunit TIM44 Average	1.09705	1	1
Protein TEX1 Average	1.09684	1	1
Vacuolar transporter chaperone 3 Average	1.09593	1	1
Vacuolar protein sorting-associated protein 13 Average	1.09503	1	1
General negative regulator of transcription subunit 4 Average	1.09263	1	1
Uncharacterized protein YMR086W Average	1.09201	1	1
DNA replication licensing factor MCM4 Average	1.09193	1	1
pH-response transcription factor pacC/RIM101 Average	1.09178	1	1
Mitochondrial inner membrane i-AAA protease supercomplex subunit MGR1 Average	1.09146	1	1
Protein TAPT1 homolog Average	1.09089	1	1
Chitin biosynthesis protein CHS6 Average	1.0899	1	1
Uncharacterized protein YKR075C Average	1.08872	1	1
Uncharacterized protein YMR316C-A Average	1.08836	1	1
TATA-box-binding protein Average	1.08788	1	1
Meiotic recombination protein REC114 Average	1.08734	1	1
Plasma membrane fusion protein PRM1 Average	1.08706	1	1
Pre-mRNA-splicing factor CLF1 Average	1.08549	1	1
Protein SKG3 Average	1.08084	1	1
Uncharacterized protein YDL183C Average	1.07962	1	1
Iron-sulfur clusters transporter ATM1, mitochondrial Average	1.07779	1	1
Casein kinase I homolog HRR25 Average	1.07726	1	1
Actin-like protein ARP8 Average	1.07565	1	1
Putative uncharacterized protein YOR218C Average	1.07544	1	1
GTP-binding protein YPT52 Average	1.07508	1	1
ISWI chromatin-remodeling complex ATPase ISW1 Average	1.07341	1	1
Ribosome biogenesis protein BMS1 Average	1.07291	1	1
Kinesin-like protein CIN8 Average	1.07151	1	1
Protein TOS4 Average	1.07077	1	1
DNA ligase 4 Average	1.07013	1	1
Mitochondrial outer membrane protein IML2 Average	1.06971	1	1
Sporulation protein 23 Average	1.06907	1	1
Protein PET122, mitochondrial Average	1.0683	1	1
Protein CAJ1 Average	1.06766	1	1
Peptide-N(4)-(N-acetyl-beta-glucosaminyl)asparagine amidase Average	1.06434	1	1
Zinc finger protein FZF1 Average	1.06398	1	1
rRNA-processing protein CGR1 Average	1.06215	1	1
1,4-alpha-glucan-branching enzyme Average	1.06171	1	1
Inositol monophosphatase 1 Average	1.05995	1	1
ATP-dependent permease PDR12 Average	1.05959	1	1
Isoamyl acetate-hydrolyzing esterase Average	1.05925	1	1
U3 small nucleolar RNA-associated protein 7 Average	1.05915	1	1
Uncharacterized RNA-binding protein YGR250C Average	1.05866	1	1
Putative uncharacterized protein YGL218W Average	1.058	1	1
Pre-mRNA-splicing factor PRP9 Average	1.05746	1	1
Histone deacetylase RPD3 Average	1.05661	1	1
Transcription initiation factor TFIID subunit 11 Average	1.05396	1	1
GTPase NPA3 Average	1.05138	1	1
Fumarate reductase Average	1.05113	1	1
Protein HIR1 Average	1.05088	1	1
Putative adenylate kinase FAP7 Average	1.05031	1	1
N-terminal acetyltransferase A complex subunit NAT1 Average	1.04829	1	1
Protein yippee-like MOH1 Average	1.04762	1	1
Purine-cytosine permease FCY22 Average	1.04278	1	1
AP-1 accessory protein LAA1 Average	1.03918	1	1
Synaptobrevin homolog YKT6 Average	1.03849	1	1
37S ribosomal protein NAM9, mitochondrial Average	1.03721	1	1
cAMP-dependent protein kinase type 1 Average	1.03705	1	1
Central kinetochore subunit CTF3 Average	1.03603	1	1
SET domain-containing protein 3 Average	1.03539	1	1
Kinesin-like protein KIP3 Average	1.03479	1	1
Glycylpeptide N-tetradecanoyltransferase Average	1.03216	1	1
Hydroxyacyl-thioester dehydratase type 2, mitochondrial Average	1.03065	1	1
GABA-specific permease Average	1.02891	1	1
Mitochondrial presequence protease Average	1.02765	1	1
Peroxisomal membrane protein PEX27 Average	1.02737	1	1
Transcription initiation factor TFIID subunit 12 Average	1.02718	1	1
Serine/threonine-protein kinase KSP1 Average	1.02615	1	1
Uncharacterized oxidoreductase YJR096W Average	1.02363	1	1
Central kinetochore subunit OKP1 Average	1.02314	1	1
DOCK-like protein YLR422W Average	1.02271	1	1
Transcription regulatory protein SNF6 Average	1.02047	1	1
60S ribosome subunit biogenesis protein NIP7 Average	1.01728	1	1
Sporulation-specific protein 71 Average	1.01638	1	1
High-affinity glucose transporter HXT2 Average	1.01564	1	1
Uncharacterized protein YKL023W Average	1.01561	1	1
Vacuolar amino acid transporter 2 Average	1.01473	1	1
Protein DIA2 Average	1.01472	1	1
Transcription factor IIIB 70 kDa subunit Average	1.01445	1	1
General transcriptional corepressor CYC8 Average	1.01248	1	1
VPS10 homolog 1 Average	1.00973	1	1
Protein BIR1 Average	1.00895	1	1
AMP deaminase Average	1.00823	1	1
Temperature shock-inducible protein 1 Average	1.00823	1	1
Mitochondrial distribution and morphology protein 31 Average	1.00724	1	1
Uncharacterized mitochondrial carrier YFR045W Average	1.00642	1	1
Putative carboxymethylenebutenolidase Average	1.00575	1	1
Centromere DNA-binding protein complex CBF3 subunit B Average	1.00491	1	1
tRNA (guanine(26)-N(2))-dimethyltransferase, mitochondrial Average	1.00489	1	1
Exocyst complex component SEC3 Average	1.00405	1	1
Vacuolar import and degradation protein 27 Average	1.00241	1	1
Type 2A phosphatase activator TIP41 Average	0.999622	1	1
Antiviral helicase SKI2 Average	0.998479	1	1
Protein MNN4 Average	0.996858	1	1
Uncharacterized protein YPL077C Average	0.996423	1	1
Regulator of ribosome biosynthesis Average	0.995353	1	1
Phosphatidylinositol 4-kinase PIK1 Average	0.993961	1	1
Uncharacterized protein YFR016C Average	0.993337	1	1
Vacuolar protein sorting-associated protein 5 Average	0.993005	1	1
Uridine nucleosidase Average	0.992533	1	1
ATP-dependent RNA helicase DBP8 Average	0.991866	1	1
26S proteasome regulatory subunit RPN9 Average	0.990456	1	1
Protein ARG5,6, mitochondrial Average	0.990207	1	1
tRNA pseudouridine synthase 4 Average	0.990057	1	1
Golgi SNAP receptor complex member 1 Average	0.990002	1	1
Probable transcriptional regulatory protein HAH1 Average	0.989447	1	1
Glutamate 5-kinase Average	0.988887	1	1
Fructose-1,6-bisphosphatase Average	0.988738	1	1
Putative uncharacterized protein YKL036C Average	0.988341	1	1
Intracellular protein transport protein USO1 Average	0.985998	1	1
DNA-directed RNA polymerase I subunit RPA135 Average	0.982642	1	1
Probable hydrolase NIT3 Average	0.982052	1	1
Target of rapamycin complex 1 subunit KOG1 Average	0.981479	1	1
26S proteasome regulatory subunit RPN6 Average	0.980185	1	1
Protein CLP1 Average	0.980143	1	1
Serine--tRNA ligase, mitochondrial Average	0.979594	1	1
Regulator of V-ATPase in vacuolar membrane protein 1 Average	0.979199	1	1
tRNA (guanine-N(7)-)-methyltransferase subunit TRM82 Average	0.977689	1	1
rRNA-processing protein EBP2 Average	0.976609	1	1
Pre-mRNA leakage protein 39 Average	0.975779	1	1
Protein SGT1 Average	0.975401	1	1
rRNA 2'-O-methyltransferase fibrillarin Average	0.974159	1	1
Regulator of free ubiquitin chains 1 Average	0.973916	1	1
Kynureninase Average	0.973524	1	1
Spindle assembly checkpoint kinase Average	0.973458	1	1
Probable mannosyltransferase YUR1 Average	0.973022	1	1
Uncharacterized protein YBR063C Average	0.971292	1	1
Alkyl/aryl-sulfatase BDS1 Average	0.969993	1	1
U3 small nucleolar RNA-associated protein 8 Average	0.969717	1	1
Protein ESC8 Average	0.96921	1	1
D-lactate dehydrogenase [cytochrome] 1, mitochondrial Average	0.967255	1	1
Uncharacterized protein YHR182W Average	0.966923	1	1
Nuclear distribution protein PAC1 Average	0.966022	1	1
Serine/threonine-protein kinase RIO1 Average	0.965251	1	1
Uncharacterized protein YBL100W-C Average	0.965005	1	1
Protein TMA108 Average	0.964134	1	1
SWIRM domain-containing protein YOR338W Average	0.963957	1	1
54S ribosomal protein MRP49, mitochondrial Average	0.962861	1	1
Exocyst complex component SEC5 Average	0.962753	1	1
Homoisocitrate dehydrogenase, mitochondrial Average	0.9627	1	1
Vacuolar protein sorting/targeting protein VPS10 Average	0.962179	1	1
Transcription initiation factor TFIID subunit 7 Average	0.962003	1	1
Pre-rRNA-processing protein IPI3 Average	0.960995	1	1
DNA repair and recombination protein RAD52 Average	0.960941	1	1
Uncharacterized protein YDR169C-A Average	0.960163	1	1
Protein transport protein SEC13 Average	0.959754	1	1
Thiamine metabolism regulatory protein THI3 Average	0.959691	1	1
ATPase family gene 2 protein Average	0.959342	1	1
Regulator of Ty1 transposition protein 101 Average	0.958729	1	1
Sterol esterase TGL1 Average	0.958413	1	1
Lysine--tRNA ligase, mitochondrial Average	0.958047	1	1
Reduced viability upon starvation protein 167 Average	0.957533	1	1
Very long-chain fatty acid transport protein Average	0.957339	1	1
DNA repair protein REV1 Average	0.956024	1	1
Spindle pole body-associated protein VIK1 Average	0.955848	1	1
Glutathione S-transferase omega-like 2 Average	0.95577	1	1
AP-1-like transcription factor YAP1 Average	0.953631	1	1
CBK1 kinase activator protein MOB2 Average	0.951924	1	1
Protein phosphatase 2C homolog 1 Average	0.95136	1	1
ADP-ribosylation factor GTPase-activating protein effector protein 2 Average	0.949702	1	1
2-deoxyglucose-6-phosphate phosphatase 1 Average	0.949287	1	1
Uncharacterized protein YER010C Average	0.948891	1	1
Protein SCO1, mitochondrial Average	0.948492	1	1
Threonine--tRNA ligase, mitochondrial Average	0.948234	1	1
Conserved oligomeric Golgi complex subunit 1 Average	0.948194	1	1
Vacuolar protein sorting-associated protein 52 Average	0.94804	1	1
Ferulic acid decarboxylase 1 Average	0.946994	1	1
Uncharacterized protein YFR018C Average	0.946562	1	1
Transposon Ty4-H Gag-Pol polyprotein Average	0.946293	1	1
37S ribosomal protein S12, mitochondrial Average	0.945884	1	1
Putative ATP-dependent helicase IRC3 Average	0.945706	1	1
Ribosome biogenesis protein MAK21 Average	0.94454	1	1
Pre-mRNA-splicing factor CWC26 Average	0.943844	1	1
Transcription factor PDR3 Average	0.942618	1	1
Spindle assembly checkpoint component MAD1 Average	0.94251	1	1
Protein SLA2 Average	0.942113	1	1
Serine/threonine-protein kinase MEC1 Average	0.94153	1	1
Quinidine resistance protein 3 Average	0.940877	1	1
Vacuolar protein sorting-associated protein 73 Average	0.939983	1	1
Antagonist of mitotic exit network protein 1 Average	0.938868	1	1
Polynucleotide 5'-triphosphatase Average	0.93798	1	1
Low-affinity potassium transport protein Average	0.937329	1	1
Nuclear polyadenylated RNA-binding protein NAB2 Average	0.937004	1	1
Putative uncharacterized protein YAL037C-A Average	0.933031	1	1
Steryl acetyl hydrolase 1 Average	0.926922	1	1
Nuclear envelope protein YPR174C Average	0.925492	1	1
Protein phosphatase 2C homolog 2 Average	0.924254	1	1
ATP-dependent RNA helicase MSS116, mitochondrial Average	0.923913	1	1
Ubiquitin ligase-binding protein BUL2 Average	0.922844	1	1
Autophagy-related protein 14 Average	0.922267	1	1
Ribosomal RNA-processing protein 17 Average	0.92067	1	1
Probable glycosidase CRH1 Average	0.919452	1	1
CRE-binding bZIP protein SKO1 Average	0.919019	1	1
DNA replication licensing factor MCM2 Average	0.913119	1	1
U3 small nucleolar RNA-associated protein 21 Average	0.909943	1	1
Structural maintenance of chromosomes protein 5 Average	0.908654	1	1
Peroxisomal membrane protein PEX29 Average	0.908177	1	1
ATP-dependent RNA helicase DBP7 Average	0.906609	1	1
Conserved oligomeric Golgi complex subunit 3 Average	0.904543	1	1
CTP synthase 2 Average	0.901262	1	1
Deoxyhypusine synthase Average	0.899923	1	1
PHO85 cyclin CLG1 Average	0.898932	1	1
DNA-directed RNA polymerases I, II, and III subunit RPABC4 Average	0.897945	1	1
Putative uncharacterized protein YKL136W Average	0.897244	1	1
Uncharacterized protein YMR178W Average	0.895798	1	1
Serine/threonine-protein kinase TOR1 Average	0.894886	1	1
Peroxisomal long-chain fatty acid import protein 1 Average	0.894385	1	1
Antiviral helicase SLH1 Average	0.893241	1	1
SAGA-associated factor 73 Average	0.892887	1	1
Geranylgeranyl transferase type-1 subunit beta Average	0.891466	1	1
Probable transcriptional regulatory protein STB4 Average	0.891313	1	1
Replication factor C subunit 1 Average	0.889308	1	1
Manganese transporter SMF1 Average	0.886138	1	1
Cytochrome c oxidase assembly protein 1 Average	0.885905	1	1
Intrastrand cross-link recognition protein Average	0.884942	1	1
Polyamine oxidase FMS1 Average	0.880129	1	1
ER-retained PMA1-suppressing protein 1 Average	0.879854	1	1
UPF0661 TPR repeat-containing protein YDR161W Average	0.877692	1	1
MAP kinase kinase MKK2/SSP33 Average	0.87695	1	1
Thiamine thiazole synthase Average	0.87649	1	1
Endoplasmic reticulum transmembrane protein 2 Average	0.873918	1	1
Protein BOP2 Average	0.873612	1	1
Ubiquitin carboxyl-terminal hydrolase 9 Average	0.873532	1	1
Importin subunit beta-1 Average	0.872879	1	1
Histidinol-phosphate aminotransferase Average	0.872818	1	1
Importin subunit alpha Average	0.872323	1	1
DNA replication complex GINS protein PSF3 Average	0.871989	1	1
tRNA 2'-phosphotransferase Average	0.871083	1	1
Leucine-rich repeat-containing protein SOG2 Average	0.870326	1	1
P-type cation-transporting ATPase Average	0.869097	1	1
RING finger protein YKR017C Average	0.868072	1	1
ATP phosphoribosyltransferase Average	0.866285	1	1
Aldehyde dehydrogenase [NAD(P)+] 2 Average	0.865245	1	1
Longevity-assurance protein 2 Average	0.863574	1	1
Phosphatidylinositol N-acetylglucosaminyltransferase GPI2 subunit Average	0.862233	1	1
Transposon Ty3-G Gag-Pol polyprotein Average	0.86208	1	1
Importin beta SMX1 Average	0.862019	1	1
ATPase-stabilizing factor 15 kDa protein Average	0.861788	1	1
Tyrosyl-DNA phosphodiesterase 1 Average	0.861672	1	1
Probable ferric reductase transmembrane component 8 Average	0.860907	1	1
Protein OCA4 Average	0.860027	1	1
Signal recognition particle subunit SEC65 Average	0.859384	1	1
Uncharacterized protein YMR074C Average	0.85927	1	1
Elongator complex protein 1 Average	0.857972	1	1
Glycerol-3-phosphate dehydrogenase, mitochondrial Average	0.857059	1	1
DNA replication regulator DPB11 Average	0.856791	1	1
Uncharacterized protein YGR121W-A Average	0.855531	1	1
Protein FYV12 Average	0.855317	1	1
Nitrogen network kinase 1 Average	0.855037	1	1
Transposon Ty4-H Gag polyprotein Average	0.852866	1	1
DNA replication licensing factor MCM3 Average	0.851509	1	1
Uncharacterized protein IRC10 Average	0.851037	1	1
Uncharacterized oxidoreductase YKL107W Average	0.849593	1	1
Probable intramembrane protease YKL100C Average	0.849121	1	1
Putative uncharacterized transporter YOL163W Average	0.848636	1	1
Delta-1-pyrroline-5-carboxylate dehydrogenase, mitochondrial Average	0.848252	1	1
Alpha-1,3-mannosyltransferase MNT2 Average	0.847036	1	1
Phosphatidylinositol transfer protein PDR16 Average	0.845236	1	1
Imidazoleglycerol-phosphate dehydratase Average	0.845001	1	1
Calcium-transporting ATPase 1 Average	0.842673	1	1
Target of rapamycin complex 2 subunit TSC11 Average	0.84208	1	1
Chitin biosynthesis protein CHS5 Average	0.841416	1	1
UPF0479 membrane protein YFL068W Average	0.840527	1	1
Putative uncharacterized protein YHR137C-A Average	0.839293	1	1
Dolichyl-diphosphooligosaccharide--protein glycosyltransferase subunit OST6 Average	0.838822	1	1
Serine/threonine-protein kinase STE11 Average	0.83742	1	1
Uncharacterized transcriptional regulatory protein YKL222C Average	0.83388	1	1
Maintenance of telomere capping protein 1 Average	0.832981	1	1
Putative nitronate monooxygenase Average	0.831737	1	1
G1-specific transcriptional repressor WHI5 Average	0.831632	1	1
Nucleolar protein 12 Average	0.827544	1	1
Cohesin subunit SCC3 Average	0.826942	1	1
Putative uncharacterized protein YGR051C Average	0.826341	1	1
Uncharacterized protein YNL022C Average	0.826091	1	1
Uncharacterized acyltransferase YDR018C Average	0.825137	1	1
Inorganic phosphate transporter PHO87 Average	0.823165	1	1
Transcription factor tau 131 kDa subunit Average	0.822504	1	1
ARF guanine-nucleotide exchange factor 1 Average	0.821662	1	1
Regulator of Ty1 transposition protein 10 Average	0.821578	1	1
Transcription regulatory protein SNF12 Average	0.820943	1	1
Nucleoporin NUP84 Average	0.820612	1	1
Crossover junction endonuclease MMS4 Average	0.820001	1	1
Uncharacterized protein YFR020W Average	0.819535	1	1
Pantothenate transporter FEN2 Average	0.818021	1	1
GTP-binding protein YPT31/YPT8 Average	0.816213	1	1
Protein TOM71 Average	0.814984	1	1
Ubiquinone biosynthesis protein COQ4, mitochondrial Average	0.811889	1	1
Probable mitochondrial transport protein FSF1 Average	0.811663	1	1
Sporulation-specific protein 1 Average	0.811001	1	1
ATP-dependent DNA helicase II subunit 2 Average	0.810938	1	1
Retrograde regulation protein 3 Average	0.810449	1	1
Ribosome biogenesis protein ERB1 Average	0.810156	1	1
Heme-responsive zinc finger transcription factor HAP1 Average	0.810011	1	1
Protein BTN2 Average	0.80848	1	1
Putative uncharacterized protein YOR169C Average	0.806004	1	1
Exosome complex component RRP45 Average	0.803845	1	1
AP-1 complex subunit sigma-1 Average	0.801591	1	1
J domain-containing protein 1 Average	0.799071	1	1
Diphthine--ammonia ligase Average	0.798975	1	1
Cyclin CCL1 Average	0.798566	1	1
Putative succinate dehydrogenase [ubiquinone] cytochrome b subunit, mitochondrial Average	0.798115	1	1
Uncharacterized protein JIP4 Average	0.796916	1	1
Ino eighty subunit 4 Average	0.794962	1	1
Protein SIP3 Average	0.794754	1	1
S-phase entry cyclin-5 Average	0.793161	1	1
37S ribosomal protein MRP1, mitochondrial Average	0.792942	1	1
5'-3' exoribonuclease 2 Average	0.79289	1	1
Thioredoxin reductase 1 Average	0.790263	1	1
Survival factor 1 Average	0.788273	1	1
Phosphomevalonate kinase Average	0.782711	1	1
Cytoplasmic export protein 1 Average	0.781433	1	1
Uncharacterized protein YCR100C Average	0.780765	1	1
Poly(A) RNA polymerase protein 1 Average	0.779648	1	1
Non-histone chromosomal protein 6A Average	0.778008	1	1
Ribosome biogenesis protein ENP2 Average	0.776766	1	1
ADP-ribosylation factor GTPase-activating protein GCS1 Average	0.775426	1	1
Protein GCN20 Average	0.775293	1	1
Cytochrome b translational activator protein CBS1, mitochondrial Average	0.772455	1	1
Peroxisomal adenine nucleotide transporter 1 Average	0.772353	1	1
Putative guanine nucleotide-exchange factor SED4 Average	0.768938	1	1
Cell wall integrity sensor MID2 Average	0.768483	1	1
Signaling mucin HKR1 Average	0.768291	1	1
Putative cystathionine beta-lyase Average	0.76391	1	1
Putative nitrilase-like protein NIT1 Average	0.763809	1	1
26S proteasome regulatory subunit RPN8 Average	0.762908	1	1
Peroxiredoxin DOT5 Average	0.762599	1	1
Polygalacturonase Average	0.761015	1	1
Pre-mRNA-splicing factor NTC20 Average	0.759559	1	1
Phosphate metabolism protein 8 Average	0.758384	1	1
Protein BIG1 Average	0.755543	1	1
SWI/SNF complex subunit SWI3 Average	0.75528	1	1
Cardiolipin-specific deacylase 1, mitochondrial Average	0.754335	1	1
Proteasome subunit beta type-7 Average	0.752355	1	1
56 kDa U1 small nuclear ribonucleoprotein component Average	0.75232	1	1
NADP-dependent alcohol dehydrogenase 7 Average	0.751728	1	1
Meiotic recombination 1 protein Average	0.750693	1	1
Nucleolar protein 4 Average	0.744945	1	1
Uncharacterized protein YOR114W Average	0.74478	1	1
Transcription factor NRM1 Average	0.744121	1	1
Protein phosphatase 2C homolog 5 Average	0.741458	1	1
N-glycosylation protein EOS1 Average	0.739683	1	1
Thiamine biosynthesis protein THI22 Average	0.739452	1	1
Nitrosoguanidine resistance protein SNG1 Average	0.737941	1	1
Neutral trehalase Average	0.737643	1	1
DNA-directed RNA polymerase II subunit RPB9 Average	0.736394	1	1
Sterol 24-C-methyltransferase Average	0.736307	1	1
Nucleolar complex-associated protein 3 Average	0.735868	1	1
Protein YSP1 Average	0.733026	1	1
Actin-related protein 2 Average	0.732824	1	1
N-terminal acetyltransferase 2 Average	0.731378	1	1
Peroxisomal membrane protein import receptor PEX19 Average	0.730066	1	1
U3 small nucleolar RNA-associated protein 5 Average	0.724806	1	1
Uncharacterized transcriptional regulatory protein YLL054C Average	0.724425	1	1
Casein kinase II subunit alpha Average	0.724135	1	1
Autophagy-related protein 22 Average	0.722512	1	1
Protein STD1 Average	0.721638	1	1
Rho-type GTPase-activating protein 2 Average	0.719856	1	1
(DL)-glycerol-3-phosphatase 2 Average	0.714354	1	1
Sorting nexin-41 Average	0.712753	1	1
Actin-interacting protein 1 Average	0.712241	1	1
Chromosome transmission fidelity protein 18 Average	0.710526	1	1
Flavohemoprotein Average	0.710238	1	1
Nuclear localization sequence-binding protein Average	0.710091	1	1
Sporulation-specific protein 21 Average	0.709536	1	1
Ferric reductase transmembrane component 4 Average	0.709315	1	1
ATP-dependent RNA helicase DBP9 Average	0.709095	1	1
Myb-like DNA-binding protein BAS1 Average	0.7089	1	1
Uncharacterized protein YGL159W Average	0.707971	1	1
Ribose-phosphate pyrophosphokinase 3 Average	0.707243	1	1
Transcriptional repressor XBP1 Average	0.706985	1	1
Diacylglycerol O-acyltransferase 1 Average	0.701615	1	1
Glutamine-dependent NAD(+) synthetase Average	0.701131	1	1
Lethal(2) giant larvae protein homolog SRO77 Average	0.699669	1	1
DNA-directed RNA polymerase I subunit RPA49 Average	0.698152	1	1
Putative uncharacterized protein YML083C Average	0.695209	1	1
Putative uncharacterized protein YOR300W Average	0.693703	1	1
Heterogeneous nuclear rnp K-like protein 2 Average	0.688012	1	1
PAB1-binding protein 1 Average	0.684486	1	1
Delta(24(24(1)))-sterol reductase Average	0.681811	1	1
Protein SSP120 Average	0.680294	1	1
Ubiquitin carboxyl-terminal hydrolase 4 Average	0.677046	1	1
Anthranilate synthase component 2 Average	0.676195	1	1
Tubulin beta chain Average	0.674785	1	1
Vacuolar protein sorting-associated protein 41 Average	0.673684	1	1
Ribosome assembly 1 protein Average	0.673493	1	1
Ankyrin repeat-containing protein YIL001W Average	0.673435	1	1
GPI transamidase component GPI16 Average	0.671543	1	1
Tubulin-specific chaperone B Average	0.671106	1	1
Putative prephenate dehydratase Average	0.670163	1	1
Putative uncharacterized protein YBL100C Average	0.669816	1	1
Target of rapamycin complex 2 subunit AVO2 Average	0.668842	1	1
Uncharacterized protein YOR093C Average	0.664228	1	1
Ribonucleases P/MRP protein subunit POP1 Average	0.663161	1	1
Uncharacterized protein YNL193W Average	0.662628	1	1
Putative uncharacterized protein YDR491C Average	0.661577	1	1
Uncharacterized protein YNL165W Average	0.659254	1	1
Golgin IMH1 Average	0.657761	1	1
U3 small nucleolar RNA-associated protein 20 Average	0.654659	1	1
Long chronological lifespan protein 2 Average	0.654044	1	1
Ribosome-releasing factor 2, mitochondrial Average	0.651787	1	1
27S pre-rRNA (guanosine(2922)-2'-O)-methyltransferase Average	0.651193	1	1
Site-specific recombinase Flp Average	0.64811	1	1
Transcription factor SMP1 Average	0.647404	1	1
ATP-dependent helicase SGS1 Average	0.646826	1	1
Probable electron transfer flavoprotein subunit alpha, mitochondrial Average	0.646578	1	1
Guanine nucleotide-binding protein subunit beta 1 Average	0.643393	1	1
Seventh homolog of septin 1 Average	0.643341	1	1
ATP-dependent RNA helicase SUV3, mitochondrial Average	0.642544	1	1
Glutathione S-transferase omega-like 1 Average	0.642113	1	1
Uncharacterized protein YKR070W Average	0.640539	1	1
Telomere elongation protein EST1 Average	0.636492	1	1
Azole resistance protein 1 Average	0.63457	1	1
Protein DOS2 Average	0.633649	1	1
PHO85 cyclin-7 Average	0.63357	1	1
Nonsense-mediated mRNA decay protein 3 Average	0.632549	1	1
Flippase kinase 1 Average	0.629375	1	1
ATP-dependent RNA helicase ROK1 Average	0.626374	1	1
S-adenosylmethionine permease SAM3 Average	0.618777	1	1
Elongation factor 1 alpha-like protein Average	0.617935	1	1
Mitochondrial translocator assembly and maintenance protein 41 Average	0.617741	1	1
Accumulates dyads protein 4 Average	0.617601	1	1
Uncharacterized protein YGR035C Average	0.61598	1	1
Sugar transporter STL1 Average	0.614266	1	1
37S ribosomal protein S8, mitochondrial Average	0.610083	1	1
Putative uncharacterized protein YKL102C Average	0.609189	1	1
Pre-mRNA-splicing factor SYF1 Average	0.606052	1	1
Nucleolar complex protein 14 Average	0.605933	1	1
Increased recombination centers protein 21 Average	0.604248	1	1
Putative uncharacterized protein YLR184W Average	0.604163	1	1
37S ribosomal protein S5, mitochondrial Average	0.599935	1	1
Spindle pole component 29 Average	0.592642	1	1
Cop9 signalosome complex subunit 11 Average	0.59032	1	1
Uncharacterized protein YBR138C Average	0.587039	1	1
NADH-cytochrome b5 reductase 1 Average	0.58543	1	1
Protein MON2 Average	0.5854	1	1
54S ribosomal protein L9, mitochondrial Average	0.584002	1	1
DNA polymerase gamma Average	0.583605	1	1
Imitation switch two complex protein 1 Average	0.579975	1	1
Putative COX1/OXI3 intron 2 protein Average	0.577501	1	1
Uncharacterized WD repeat-containing protein YOL087C Average	0.57737	1	1
Serine/threonine-protein kinase VPS15 Average	0.576833	1	1
60S ribosomal protein L24-B Average	0.576621	1	1
37S ribosomal protein S22, mitochondrial Average	0.574906	1	1
Phosphatidylglycerol phospholipase C Average	0.572781	1	1
GTPase-activating protein BEM2/IPL2 Average	0.567355	1	1
Uncharacterized protein YNR040W Average	0.56688	1	1
Transmembrane protein YOR223W Average	0.565649	1	1
Phosphoribosylaminoimidazole-succinocarboxamide synthase Average	0.559191	1	1
Nucleoporin NUP100/NSP100 Average	0.556957	1	1
Peptide methionine sulfoxide reductase Average	0.555051	1	1
Serine palmitoyltransferase 2 Average	0.553581	1	1
Aspartate--tRNA ligase, mitochondrial Average	0.551225	1	1
Pachytene checkpoint protein 2 Average	0.546237	1	1
Anaphase-promoting complex subunit 2 Average	0.543863	1	1
ATP-dependent DNA helicase MPH1 Average	0.540755	1	1
Phosphatidylserine decarboxylase proenzyme 2 Average	0.537812	1	1
Increasing suppression factor 1 Average	0.535596	1	1
Catalase T Average	0.5322	1	1
FK506-binding protein 4 Average	0.528062	1	1
60S ribosomal protein L15-B Average	0.525384	1	1
37S ribosomal protein PET123, mitochondrial Average	0.524231	1	1
Phosphoserine phosphatase Average	0.517644	1	1
Transcriptional regulatory protein LGE1 Average	0.513834	1	1
Proteasome assembly chaperone 2 Average	0.513102	1	1
54S ribosomal protein L11, mitochondrial Average	0.51234	1	1
F-box protein HRT3 Average	0.505486	1	1
37S ribosomal protein S23, mitochondrial Average	0.499474	1	1
Uncharacterized protein YBL059W Average	0.499024	1	1
F-box protein SKP2 Average	0.49057	1	1
DnaJ homolog 1, mitochondrial Average	0.484877	1	1
Serine/threonine-protein kinase ELM1 Average	0.484067	1	1
Probable GTPase-activating protein GYL1 Average	0.483916	1	1
Guanine nucleotide-binding protein subunit beta Average	0.47843	1	1
Eukaryotic translation initiation factor eIF-1 Average	0.478224	1	1
Golgi to ER traffic protein 2 Average	0.471082	1	1
Protein APA1 Average	0.465841	1	1
Meiosis-specific APC/C activator protein AMA1 Average	0.464703	1	1
Ferric/cupric reductase transmembrane component 1 Average	0.457363	1	1
Protein SBE22 Average	0.454185	1	1
Rho-GTPase-activating protein BAG7 Average	0.446292	1	1
Protein MSS51, mitochondrial Average	0.435844	1	1
Peroxisomal-coenzyme A synthetase Average	0.426247	1	1
54S ribosomal protein L49, mitochondrial Average	0.42273	1	1
Uncharacterized protein YIL161W Average	0.416639	1	1
Histone H3 Average	0.392836	1	1
Probable metalloreductase AIM14 Average	0.373745	1	1
Protein ROT1 Average	0.358977	1	1
ATP-dependent permease PDR11 Average	0.354313	1	1
Protein phosphatase PP2A regulatory subunit A Average	0.350254	1	1
U1 SNP1-associating protein 1 Average	0.335246	1	1
tRNA pseudouridine(38/39) synthase Average	0.331593	1	1
Putative zinc metalloprotease TRE2 Average	0.324822	1	1
Thioredoxin-3, mitochondrial Average	0.312277	1	1
Protein EFR3 Average	0.306382	1	1
Pumilio homology domain family member 4 Average	0.304631	1	1
mRNA cap guanine-N7 methyltransferase Average	0.278192	1	1
DASH complex subunit DAM1 Average	0.222212	1	1
Thiamine biosynthesis regulatory protein Average	0.219279	1	1

## Sheet: Soluble
Database: SwissProt.Saccharomyces.cerevisiae		Fold-change relative to WT (3 biological replicates)	p < 0.05
entry_name	accession_number	SUA5_FC	Ttest	TotPep	UniPep	log2FC
Heat shock protein SSC3, mitochondrial ECM10/YEL030W	P39987	3.02467	0.0225679	29	1	1.59678
Transcription initiation factor IIA subunit 2 TOA2/YKL058W	P32774	2.40302	0.385971	2	2	1.26485
Uncharacterized protein YCR108C	Q3E819	2.37034	0.153883	1	1	1.2451
12 kDa heat shock protein HSP12/YFL014W	P22943	2.35857	0.036229	27	6	1.23791
Carbonic anhydrase	P53615	2.33543	0.00767113	6	2	1.22369
rRNA methyltransferase 2, mitochondrial	P53123	2.28872	0.0467967	2	2	1.19454
Cell wall protein TIR3	P40552	2.26099	0.00342513	1	1	1.17696
Ribosome biogenesis protein 15 NOP15/YNL110C	P53927	2.22285	0.16432	2	2	1.15241
Uncharacterized membrane protein YGR016W	P53209	2.19968	0.0746621	1	1	1.13729
Plasma membrane ATPase 1	P05030	2.19785	0.0216927	2	1	1.13609
Protein AST1	P35183	2.12772	0.439038	3	3	1.08931
Pyruvate dehydrogenase E1 component subunit beta, mitochondrial	P32473	2.04892	0.0672707	4	4	1.03487
60S ribosomal protein L5	P26321; P26754	1.9951	0.0124485	26	1	0.996463
Uncharacterized membrane protein YDL218W	Q07629	1.97467	0.102921	1	1	0.981615
Putative uncharacterized protein YPL114W	O13518	1.91002	0.054179	1	1	0.933588
Exosome complex component RRP40	Q08285	1.89808	0.0122328	1	1	0.924544
Putative uncharacterized protein YOR139C	Q08532	1.88008	0.0134395	1	1	0.910794
Actin-related protein 2/3 complex subunit 3	Q05933	1.87438	0.0883501	1	1	0.90641
Putative uncharacterized protein YIL115W-A	A0A023PZJ9	1.84928	0.00850512	1	1	0.886967
Heat shock protein SSC1, mitochondrial	P0CS90; P0CS91	1.83671	0.0103933	45	4	0.877126
ADP-ribose 1''-phosphate phosphatase	P38218	1.80215	0.0602203	1	1	0.849717
Ribosome production factor 1	P38805	1.78342	0.102477	5	5	0.83465
Uncharacterized protein YDL211C	Q12121	1.75368	0.0144638	3	3	0.810388
Uncharacterized protein YBR085C-A	O43137	1.75002	0.0235802	9	2	0.807374
Interacting with cytoskeleton protein 1	Q04329	1.7479	0.0473089	4	2	0.805627
tRNA-splicing endonuclease subunit SEN2	P16658	1.74127	0.0547259	5	5	0.800137
Putative uncharacterized protein YKL031W	P36098	1.73255	0.210112	6	2	0.7929
Putative uncharacterized protein YNL097W-A	Q8TGL8	1.72717	0.218465	2	1	0.788412
Plasma membrane ATPase 2	P19657; P05030	1.72276	0.000857039	36	9	0.784723
60S ribosomal protein L37-A	P49166	1.71908	0.151608	6	6	0.781638
rRNA-processing protein CGR1	P53188	1.71818	0.0358417	7	6	0.780878
DNA-directed RNA polymerases I, II, and III subunit RPABC4	P40422	1.71016	0.0873649	3	3	0.774127
Heat shock protein SSA4	P22202; P10592	1.70538	0.0704938	5	2	0.770092
Alpha1-proteinase inhibitor-degradation deficient protein 37	Q03233	1.70463	0.0575942	3	3	0.769459
Zinc finger protein LEE1	Q02799	1.69561	0.115852	1	1	0.761803
Ferric/cupric reductase transmembrane component 7	Q12333	1.69507	0.0856391	2	2	0.761346
Mitochondrial import receptor subunit TOM5	P80967	1.69224	0.0237641	2	2	0.758938
78 kDa glucose-regulated protein homolog	P16474	1.68145	0.00155144	79	10	0.749704
Zinc finger protein STP3	Q05937	1.67969	0.0594838	1	1	0.748196
Protein OPY2	Q06810	1.67584	0.0334165	1	1	0.744888
Cytochrome b-c1 complex subunit 10	P37299	1.66957	0.0180997	1	1	0.739477
V-type proton ATPase subunit B	P16140	1.66571	0.0381167	5	1	0.736139
Putative uncharacterized protein YAR019W-A	A0A023PXB0	1.66019	0.0582726	3	3	0.731347
Sulfiredoxin	P36077	1.64982	0.0124944	2	2	0.722308
Putative uncharacterized protein YLR123C	Q12174	1.64654	0.0725758	3	2	0.719436
MAP kinase kinase PBS2	P08018	1.64394	0.104248	6	5	0.717155
Putative uncharacterized protein YML101C-A	Q6B0Z2	1.64353	0.0447112	1	1	0.716795
40S ribosomal protein S18-B	P0CX56;P0CX55	1.63803	0.0472652	1	1	0.71196
Uncharacterized protein YFR018C	P43599	1.62955	0.0360055	1	1	0.704475
Protein-S-isoprenylcysteine O-methyltransferase	P32584	1.62869	0.0524034	1	1	0.703709
Vacuolar protein sorting-associated protein 28	Q02767	1.6273	0.0775869	1	1	0.702479
Cytochrome c oxidase assembly protein COX19	Q3E731	1.61929	0.0563003	1	1	0.695361
Ubiquitin carboxyl-terminal hydrolase 8	P50102	1.61592	0.185171	4	4	0.692359
Vacuolar morphogenesis protein 10	Q08474	1.6137	0.0141634	30	20	0.690376
RNA polymerase II subunit A C-terminal domain phosphatase SSU72	P53538	1.60818	0.0816184	5	5	0.685432
Cytochrome c oxidase subunit 6A, mitochondrial	P32799	1.6045	0.0542325	1	1	0.682125
Threonine--tRNA ligase, mitochondrial	P07236	1.60419	0.034643	3	3	0.681842
Glucokinase-1	P17709	1.59908	0.133825	3	3	0.677238
Cell division cycle protein CDT1	P47112	1.5901	0.0830134	4	4	0.66912
Autophagy protein 16	Q03818	1.58434	0.091432	7	6	0.663881
Protein PRY1	P47032	1.58078	0.177246	1	1	0.660636
Putative uncharacterized protein YBR206W	P38309	1.57067	0.00511347	2	2	0.651382
Uncharacterized protein YML037C	Q03703	1.57038	0.0687305	4	3	0.651114
Mitochondrial peroxiredoxin PRX1	P34227	1.56847	0.0329282	21	1	0.649362
Inheritance of peroxisomes protein 1	Q03694	1.56697	0.020527	6	5	0.647977
LAS seventeen-binding protein 5	P25369	1.56408	0.0825865	8	2	0.645313
60S ribosomal protein L37-B	P51402	1.56263	0.0513182	6	6	0.64398
Elongation factor 3A	P16521	1.5579	0.00225333	27	4	0.639599
FIT family protein YFT2	Q06676	1.55706	0.00984192	3	2	0.638823
Uncharacterized membrane protein YPR071W	Q12346	1.55534	0.157864	1	1	0.637232
Heat shock protein SSA2	P10592	1.54967	0.0129321	129	7	0.631963
Acetolactate synthase small subunit, mitochondrial	P25605	1.5478	0.12219	3	2	0.630223
Putative uncharacterized protein YMR141C	P40211	1.54543	0.0479451	2	2	0.62801
Protein SPH1	Q06160	1.54464	0.00085823	53	34	0.627267
Protein BIG1	P38813	1.53443	0.163754	4	3	0.617704
Putative uncharacterized protein YBL083C	P38178	1.53289	0.112988	2	2	0.616251
Tryptophan synthase	P00931	1.5251	0.0585628	2	2	0.608902
Protein BCK2	P33306	1.52101	0.0937846	5	3	0.605034
Uncharacterized protein YHR202W	P38887	1.51913	0.0979044	1	1	0.603242
Autophagy-related protein 39	Q06159	1.51913	0.0573451	75	44	0.603241
60S ribosomal protein L22-B	P56628; P05749	1.51902	0.0965631	7	1	0.603143
Glutathione peroxidase 2	P38143; P40581	1.51653	0.000227522	1	1	0.600776
Glutathione S-transferase 1	P40582	1.51501	0.0703657	19	6	0.599327
Sulfite efflux pump SSU1	P41930	1.51459	0.00114312	1	1	0.598924
Putative uncharacterized protein YGL165C	P53106	1.51283	0.198334	1	1	0.597249
54S ribosomal protein L36, mitochondrial	P36531	1.5063	0.0798157	3	3	0.591006
Uncharacterized membrane protein YMR010W	Q03687	1.50425	0.0305986	16	2	0.589047
Meiotic recombination protein REC102	Q02721	1.50036	0.245149	1	1	0.585312
Tropomyosin-2	P40414	1.49892	0.00162366	4	4	0.583928
Recombination protein 107	P21651	1.49757	0.0502187	3	3	0.582626
ADP-ribosylation factor-like protein 1	P38116	1.49697	0.0728403	2	2	0.582044
Vacuolar protein-sorting-associated protein 36	P38109	1.49688	0.0964618	5	3	0.581957
Autophagy-related protein 32	P40458	1.49215	0.0904156	10	4	0.577394
ATP-dependent permease PDR11	P40550	1.49096	0.0835076	57	41	0.576238
Vacuolar basic amino acid transporter 4	Q04602	1.49085	0.121923	2	2	0.576133
Small nuclear ribonucleoprotein-associated protein B	P40018	1.48872	0.069337	2	2	0.574072
Trehalose synthase complex regulatory subunit TPS3	P38426	1.48122	0.40781	7	5	0.566789
60S ribosomal protein L6-B	P05739	1.47663	0.0359692	11	1	0.56231
U6 snRNA-associated Sm-like protein LSm5	P40089	1.4766	0.139525	1	1	0.562279
Signal recognition particle subunit SRP21	P32342	1.47573	0.129584	1	1	0.561429
Protein GAT2	P40209	1.47496	0.0773141	3	3	0.560672
Uncharacterized protein YHR138C	P38841	1.4663	0.0479755	1	1	0.55218
Isocitrate dehydrogenase [NADP], mitochondrial	P21954	1.46397	0.197736	3	2	0.549883
Essential for maintenance of the cell wall protein 1	P42842	1.46378	0.0423897	9	8	0.549698
Proteasome chaperone 4	Q12245	1.46377	0.0422056	2	2	0.549691
Inositol-pentakisphosphate 2-kinase	Q06667	1.46132	0.0513038	8	6	0.547272
Putative uncharacterized protein YIL068W-A	A0A023PXN3	1.46039	0.0947261	1	1	0.546359
Uncharacterized protein YHR173C	P38864	1.45753	0.123437	1	1	0.543527
Glycerol-1-phosphate phosphohydrolase 1	P41277	1.45701	0.0122706	20	3	0.543012
Geranylgeranyl transferase type-1 subunit beta	P18898	1.45183	0.112172	1	1	0.537877
40S ribosomal protein S30-A	P0CX33	1.45132	0.15748	2	2	0.537365
Inorganic phosphate transport protein PHO88	P38264	1.45049	0.108005	8	2	0.536542
Ketol-acid reductoisomerase, mitochondrial	P06168	1.44737	0.143646	2	2	0.533439
Endochitinase	P29029	1.44591	0.0997918	1	1	0.531976
Uncharacterized protein YMR265C	Q03508	1.44428	0.0722708	10	10	0.530354
Folylpolyglutamate synthase	Q08645	1.44332	0.0425668	27	7	0.529391
Peroxiredoxin HYR1	P40581	1.44245	0.0181791	11	2	0.528519
37S ribosomal protein S9, mitochondrial	P38120	1.44112	0.0979554	3	3	0.527194
Factor arrest protein 3	P46671	1.43736	0.408497	3	3	0.523425
S-adenosylmethionine synthase 1	P10659; P19358	1.43678	0.0357158	1	1	0.522841
Sterol uptake protein 2	Q12286	1.43231	0.150021	2	2	0.51834
Putative uncharacterized protein YBR089W	P38252	1.42347	0.00947632	2	2	0.509408
Altered inheritance of mitochondria protein 23, mitochondrial	P47015	1.42066	0.0779411	9	8	0.50656
ATP synthase subunit f, mitochondrial	Q06405	1.41928	0.0345022	1	1	0.50516
Putative uncharacterized protein YLR400W	Q06051	1.418	0.389628	1	1	0.503861
Glyceraldehyde-3-phosphate dehydrogenase 3	P00359; P00358	1.41727	0.0326678	167	6	0.50311
Putative uncharacterized protein YDR327W	P87288	1.41639	0.0822346	1	1	0.502223
Protein PCF11	P39081	1.41563	0.106938	4	4	0.50144
Probable 26S proteasome regulatory subunit p28	P50086	1.41529	0.176345	3	1	0.501098
Uncharacterized protein YOR062C	P36025	1.41382	0.0249393	3	3	0.499596
Putative uncharacterized protein YOR277C	Q08736	1.41225	0.203236	1	1	0.497998
Heat shock protein SSA1	P10591; P10592	1.41123	0.0149471	130	13	0.496956
Transmembrane 9 superfamily member 3	P40071	1.41115	0.0024744	1	1	0.496876
SAGA-associated factor 29	P25554	1.4103	0.0116592	1	1	0.496006
Peroxiredoxin type-2	P38013	1.40966	0.140812	245	11	0.495348
Sporulation-specific mitogen-activated protein kinase SMK1	P41808	1.40938	0.0391025	3	2	0.49506
Medium-chain fatty acid ethyl ester synthase/esterase 2	P38295	1.40707	0.169717	3	3	0.492693
Protein transport protein SEC1	P30619	1.40491	0.173484	3	3	0.490473
Small COPII coat GTPase SAR1	P20606	1.40446	0.00453559	9	3	0.490013
Inhibitory regulator protein IRA2	P19158	1.40208	0.00362243	65	44	0.487566
H/ACA ribonucleoprotein complex subunit 1	P28007	1.40077	0.0261462	8	3	0.486219
Putative proline--tRNA ligase YHR020W	P38708	1.39948	0.0431112	16	1	0.484891
54S ribosomal protein L28, mitochondrial	P36527	1.39751	0.191916	4	3	0.482854
Ras-like protein 1	P01119	1.39742	0.00758274	2	2	0.482768
Ribosomal lysine N-methyltransferase 5	Q12367	1.39316	0.116759	3	3	0.478359
40S ribosomal protein S26-B	P39939; P39938	1.39297	0.0871202	2	1	0.478166
Actin	P60010	1.39154	0.0314505	23	7	0.476681
High mobility group protein 1	Q03973	1.39095	0.0254387	5	5	0.476068
Glycerol-1-phosphate phosphohydrolase 2	P40106; P41277	1.38965	0.00649702	7	2	0.474718
Probable S-adenosylmethionine-dependent methyltransferase CRG1	P38892	1.3893	0.0506422	20	11	0.474359
Protein transport protein SBH2	P52871	1.38863	0.244737	1	1	0.473659
Exosome complex component RRP46	P53256	1.38488	0.0880669	1	1	0.469759
Putative uncharacterized protein YER188W	P40103	1.3812	0.0964384	1	1	0.465924
Uncharacterized protein YGL230C	P53074	1.38053	0.330525	1	1	0.465219
Dolichol kinase	P20048	1.38023	0.118131	6	4	0.464905
Uncharacterized protein YNR029C	P53729	1.37928	0.554055	1	1	0.463917
Glucose-6-phosphate 1-dehydrogenase	P11412	1.37701	0.0292274	1	1	0.46154
Sorting nexin-4	P47057	1.3759	0.231625	8	6	0.460371
Ribosome-associated complex subunit SSZ1	P38788	1.37401	0.0420908	20	3	0.458391
Protein BCH1	Q05029	1.37218	0.118175	40	12	0.456468
Suppressor of lethality of KEX2 GAS1 double null mutant protein 1	P36169	1.37156	0.290191	1	1	0.455817
Mitochondrial phosphate carrier protein	P23641	1.36541	0.103775	2	2	0.449331
Dolichyl-diphosphooligosaccharide--protein glycosyltransferase subunit OST6	Q03723	1.36482	0.0395512	3	3	0.448709
Putative uncharacterized protein YER076C	P40049	1.36327	0.478925	4	3	0.447068
Putative uncharacterized protein YDR537C	P87261	1.36273	0.0447198	1	1	0.446503
Alpha-1,3-mannosyltransferase MNT2	P53059	1.36168	0.0415267	2	2	0.445387
Putative uncharacterized membrane protein YER076W-A	A0A023PXJ3	1.36088	0.0973445	2	2	0.444541
Processing of GAS1 and ALP protein 2	P53903	1.36058	0.0527898	6	2	0.444223
Pentamidine resistance factor, mitochondrial	P38969	1.36031	0.372934	11	9	0.443934
Putative uncharacterized protein YCR025C	P25352	1.35988	0.127923	4	4	0.443478
WD repeat-containing protein JIP5	Q06214	1.35953	0.129612	7	6	0.44311
Fe-S cluster assembly protein DRE2	P36152	1.3554	0.0837741	1	1	0.438718
Non-histone chromosomal protein 6B	P11633	1.35376	0.0710836	7	1	0.436971
Putative uncharacterized protein YLR416C	Q06695	1.35288	0.0828561	1	1	0.436038
60S ribosomal protein L18-A	P0CX49;P0CX50	1.35288	0.319042	19	1	0.436033
Hexokinase-1	P04806	1.35249	0.00266726	8	6	0.435613
ATP-dependent 6-phosphofructokinase subunit alpha	P16861	1.35235	0.00201739	39	4	0.435465
Synaptobrevin homolog 2	P33328	1.35207	0.0231598	5	1	0.435168
40S ribosomal protein S6-A	P0CX37;P0CX38	1.35074	0.0237433	11	1	0.433752
Biogenesis of lysosome-related organelles complex 1 subunit VAB2	P40003	1.34956	0.155298	2	2	0.432489
Uncharacterized protein YOL155W-A	Q3E7Y8	1.34841	0.00655973	2	2	0.431259
Obg-like ATPase homolog	P38746	1.34577	0.0874634	2	2	0.428436
Ribonuclease H2 subunit A	P53942	1.34509	0.0942397	1	1	0.427707
Replication factor C subunit 2	P40348	1.34403	0.0330801	3	3	0.426567
Replication factor A protein 1	P22336	1.34321	0.127925	11	11	0.42568
Glycine cleavage system H protein, mitochondrial	P39726	1.34164	0.0107488	9	3	0.423997
Diphthamide biosynthesis protein 1	P40487	1.34027	0.0784512	7	5	0.422519
Peroxisome assembly protein 22	P39718	1.33868	0.263917	2	2	0.420807
Uncharacterized protein YLR154C-H	P0CY02	1.33679	0.0381132	1	1	0.418773
Bypass of stop codon protein 4	P53841	1.33661	0.3556	9	6	0.418578
Protein GIS4	Q04233	1.33649	0.302116	3	3	0.418448
Uncharacterized bolA-like protein YAL044W-A	Q3E793	1.33327	0.0483641	3	3	0.414972
Probable aryl-alcohol dehydrogenase AAD4	Q07747	1.33045	0.00699412	8	7	0.411911
40S ribosomal protein S28-A	Q3E7X9; P0C0X0	1.32925	0.0116351	5	2	0.410608
Uncharacterized protein YGL006W-A	Q3E802	1.326	0.0577133	2	2	0.407083
60S ribosomal protein L7-A	P05737	1.32566	0.103174	9	1	0.406713
Putative uncharacterized protein YNL226W	P53864	1.32447	0.030498	5	3	0.405413
KRR1 small subunit processome component	P25586	1.32362	0.234678	21	3	0.404485
Mitochondrial outer membrane protein porin 2	P40478	1.32247	0.059309	1	1	0.403234
SED5-binding protein 3	P38810	1.32182	0.0909445	12	10	0.402522
J domain-containing protein APJ1	P53940	1.32147	0.0951161	2	2	0.402144
Karyogamy protein KAR4	P25583	1.32101	0.575666	4	3	0.401638
General negative regulator of transcription subunit 4	P34909	1.32091	0.15155	3	3	0.401536
Uncharacterized protein YDR124W	Q04608	1.32042	0.146319	3	3	0.400995
Cytochrome c oxidase protein 20, mitochondrial	Q04935	1.3196	0.0309458	1	1	0.400106
Ingression protein 1	P53901	1.31778	0.124071	3	3	0.398109
Filament protein FIN1	Q03898	1.31688	0.00833269	3	2	0.397126
N-acetyltransferase ECO1	P43605	1.31547	0.0809212	4	4	0.39558
Dolichyl-phosphate-mannose--protein mannosyltransferase 5	P52867	1.31506	0.0237235	6	4	0.395129
Putative uncharacterized protein YLL020C	Q07811	1.31471	0.00870137	7	3	0.394743
Uncharacterized protein YIR021W-A	Q3E739	1.31357	0.108887	1	1	0.393491
Type 2A phosphatase-associated protein 42	Q04372	1.31178	0.0453537	4	4	0.391526
Heat shock protein SSB2	P40150; P11484	1.30984	0.0105229	60	24	0.389391
CBK1 kinase activator protein MOB2	P43563	1.30864	0.0238352	6	6	0.388068
Uncharacterized protein YKL077W	P36081	1.30837	0.0289525	5	4	0.387775
Rab guanine nucleotide exchange factor SEC2	P17065	1.30542	0.0540588	9	5	0.384511
Probable transporter MCH4	Q08268	1.30488	0.0168572	9	9	0.383914
Telomere length regulation protein ELG1	Q12050	1.30427	0.0128307	3	2	0.383244
Meiosis-specific APC/C activator protein AMA1	P50082	1.30207	0.0190834	4	3	0.380812
Putative UPF0377 protein YHL045W	P38726	1.30206	0.0505852	4	4	0.380793
ATP-dependent DNA helicase SRS2	P12954	1.30078	0.0475206	9	9	0.379379
Serine hydroxymethyltransferase, cytosolic	P37291	1.30011	0.00360357	28	5	0.378639
Mitochondrial import inner membrane translocase subunit TIM17	P39515	1.29965	0.0963989	2	2	0.378128
Ribosome-releasing factor 2, mitochondrial	P39677	1.29842	0.011022	5	4	0.376755
DNA-directed RNA polymerases I, II, and III subunit RPABC2	P20435	1.29768	0.077798	6	1	0.37593
Putative hexose transport activator protein	P29589	1.29714	0.0431039	1	1	0.375339
GPI transamidase component GAA1	P39012	1.2964	0.12543	1	1	0.374511
Sporulation protein SPS18	P32572	1.29634	0.0506436	6	6	0.374441
Cytochrome c oxidase subunit 6, mitochondrial	P00427	1.29526	0.0214952	5	5	0.373246
54S ribosomal protein L38, mitochondrial	P35996	1.29446	0.0389449	2	2	0.372355
UTP--glucose-1-phosphate uridylyltransferase	P32861	1.29159	0.208801	1	1	0.369153
ADP,ATP carrier protein 2	P18239	1.29129	0.0197875	14	2	0.368817
Putative uncharacterized protein YOR199W	Q08604	1.29085	0.137384	2	2	0.368322
60S ribosomal export protein NMD3	P38861	1.28821	0.013554	6	3	0.365365
DNA-directed RNA polymerases I, II, and III subunit RPABC5	P22139	1.28786	0.300115	4	4	0.364981
40S ribosomal protein S8-A	P0CX39	1.28611	0.0633019	3	3	0.363009
60S ribosomal protein L22-A	P05749	1.28532	0.0190527	1	1	0.362125
Putative uncharacterized membrane protein YBR064W	P38240	1.28406	0.0282375	3	2	0.360714
MICOS complex subunit MIC12	P38341	1.28343	0.0272895	1	1	0.360003
Probable E3 ubiquitin-protein ligase HUL5	P53119	1.28332	0.0377668	24	18	0.359885
Iron transport multicopper oxidase FET3	P38993	1.28331	0.10585	6	3	0.359873
Threonine--tRNA ligase, cytoplasmic	P04801	1.28275	0.0257014	17	17	0.359244
Elongation factor 1-gamma 1	P29547; P36008	1.2822	0.0115284	14	2	0.35862
Saccharopepsin	P07267	1.28052	0.0241386	2	2	0.356729
T-complex protein 1 subunit alpha	P12612	1.27884	0.0886498	9	8	0.354835
Fructose-bisphosphate aldolase	P14540	1.27721	0.0139095	39	6	0.352998
54S ribosomal protein L6, mitochondrial	P32904	1.27709	0.0137642	3	3	0.352865
Uncharacterized protein YGL081W	P53156	1.27707	0.0293501	4	3	0.352836
Peflin	P53238	1.27702	0.183926	2	2	0.352776
ATP-dependent 6-phosphofructokinase subunit beta	P16862	1.27575	0.0094986	81	4	0.351345
DnaJ homolog 1, mitochondrial	P35191	1.27399	0.0213141	6	6	0.349352
Ribosome assembly protein 3	Q05942	1.27399	0.143448	4	4	0.349351
26S protease regulatory subunit 6A	P33297	1.27393	0.011068	2	2	0.349282
Suppressor of kinetochore protein 1	P52286	1.27328	0.103179	8	3	0.348552
Ubiquitin-conjugating enzyme E2 4	P15731; P15732	1.27193	0.059134	19	1	0.347015
ATP-dependent DNA helicase II subunit 2	Q04437	1.27181	0.121757	60	20	0.346884
Putative uncharacterized protein YJL032W	P47059	1.2715	0.448483	2	2	0.346529
Protein PET111, mitochondrial	P08468	1.27048	0.0431614	13	12	0.345373
Serine palmitoyltransferase 1	P25045	1.26992	0.156268	7	5	0.344742
6-phosphofructo-2-kinase 2	Q12471	1.26982	0.236028	2	2	0.344622
40S ribosomal protein S24-B	P0CX32;P0CX31	1.26864	0.0878188	1	1	0.34328
Uncharacterized protein YNL011C	P53980	1.26826	0.245703	3	2	0.342852
Replication factor C subunit 3	P38629	1.26803	0.0285721	7	6	0.342587
Mediator of RNA polymerase II transcription subunit 8	P38304	1.26407	0.0994516	2	2	0.338072
Arginyl-tRNA--protein transferase 1	P16639	1.26307	0.131952	7	7	0.336932
Ribonucleoside-diphosphate reductase small chain 1	P09938	1.26277	0.0543458	5	5	0.336593
Sporulation-specific chitinase 2	Q06350	1.26196	0.0861049	4	4	0.335671
Protein kinase C-like 1	P24583	1.26163	0.00187162	10	9	0.335288
Protein SAP1	P39955	1.26111	0.00809314	5	5	0.334697
ARS-binding factor 1	P14164	1.26091	0.0536005	8	5	0.334462
Arginine biosynthesis bifunctional protein ArgJ, mitochondrial	Q04728	1.26079	0.0235995	41	31	0.334324
Hsp90 co-chaperone HCH1	P53834	1.25923	0.00105008	5	1	0.332541
Heat shock protein homolog SSE2	P32590; P32589	1.25903	0.00600405	10	3	0.332313
NAD(+) kinase	P21373	1.25892	0.180535	14	8	0.332183
MEMO1 family protein YJR008W	P47085	1.25845	0.102522	4	3	0.331651
Uncharacterized protein YOL029C	Q08187	1.25832	0.107924	5	3	0.331502
37S ribosomal protein S17, mitochondrial	Q03246	1.25826	0.00371878	1	1	0.33143
General negative regulator of transcription subunit 3	P06102	1.25815	0.31542	14	14	0.331308
Uncharacterized protein YJL027C	P47063	1.25742	0.232983	2	2	0.330468
Glycine--tRNA ligase 1, mitochondrial	P38088	1.25673	0.0242929	26	2	0.329678
Alcohol dehydrogenase 4	P10127	1.25666	0.142477	3	3	0.329594
1-acylglycerol-3-phosphate O-acyltransferase ICT1	Q12385	1.25519	0.114753	3	2	0.327907
Protein HLR1	Q04429	1.25496	0.0403395	7	6	0.32764
External NADH-ubiquinone oxidoreductase 1, mitochondrial	P40215	1.25451	0.102253	2	2	0.327122
Protein SSO2	P39926	1.25437	0.386855	10	1	0.32696
GTPase-activating protein GYP2	P53258	1.25412	0.0318271	14	14	0.326671
Mitochondrial N(5)-glutamine methyltransferase MTQ1	P53944	1.25371	0.238295	4	4	0.326199
Uncharacterized protein YGR050C	P53231	1.25347	0.0166799	5	4	0.325924
Pyruvate carboxylase 1	P11154; P32327	1.2533	0.057606	33	3	0.325733
Prospore formation at selected spindle poles protein 1	P38872	1.25286	0.030217	21	15	0.325225
Mannose-6-phosphate isomerase	P29952	1.25279	0.162634	6	2	0.325149
Octanoyltransferase, mitochondrial	Q06005	1.25217	0.0347156	8	8	0.324431
EKC/KEOPS complex subunit PCC1	Q3E833	1.25147	0.188457	1	1	0.323629
Pyrimidine pathway regulatory protein 1	P07272	1.25133	0.300017	5	5	0.323459
Uncharacterized protein MRP8	P35719	1.25063	0.0300362	16	4	0.322658
RNA polymerase I-specific transcription initiation factor RRN5	Q02983	1.25062	0.0393167	8	8	0.322639
Nucleoporin NUP116/NSP116	Q02630	1.24853	0.0639072	2	2	0.320227
Meiosis-specific protein HOP1	P20050	1.24842	0.126368	7	6	0.3201
Peroxisomal acyl-coenzyme A thioester hydrolase 1	P41903	1.24758	0.0478675	6	5	0.319137
TRAPP-associated protein TCA17	P32613	1.24739	0.136464	2	2	0.318917
37S ribosomal protein S23, mitochondrial	Q01163	1.24729	0.0143699	15	10	0.318802
Uncharacterized mitochondrial carrier YPR011C	Q12251	1.24711	0.0351966	2	2	0.318587
Rho-type GTPase-activating protein 1	P39083	1.24696	0.0391362	5	5	0.318412
Succinate/fumarate mitochondrial transporter	P33303	1.24641	0.181671	2	1	0.317784
Alpha-agglutinin	P20840	1.24549	0.0672801	3	3	0.316717
Transcriptional regulator MET31	Q03081	1.24508	0.0668777	2	2	0.316239
Cell cycle arrest protein BUB3	P26449	1.24498	0.245656	4	4	0.316125
Guanine-nucleotide exchange factor YEL1	P34225	1.24484	0.0947714	6	6	0.315958
Cytochrome P450 61	P54781	1.2444	0.105744	7	7	0.315455
Mitosis inhibitor protein kinase SWE1	P32944	1.24405	0.0980796	8	6	0.315046
Pre-rRNA-processing protein IPI3	P53877	1.2437	0.0303798	12	8	0.314639
Maltose fermentation regulatory protein YPR196W	Q06595	1.2434	0.0322525	5	4	0.314286
UPF0061 protein FMP40	Q08968	1.24265	0.108587	5	5	0.313424
DnaJ-related protein SCJ1	P25303	1.24129	0.0695473	3	3	0.311839
Endonuclease III homolog 2	Q08214	1.24118	0.0194942	12	7	0.311715
Protein ECM21	P38167	1.24026	0.147958	8	7	0.310645
Eukaryotic translation initiation factor 5	P38431	1.23988	0.00223637	2	2	0.310198
Transcription factor SMP1	P38128	1.23913	0.382689	2	2	0.309324
60S acidic ribosomal protein P0	P05317	1.2391	0.135927	45	9	0.309295
T-complex protein 1 subunit eta	P42943	1.23909	0.130812	5	4	0.309282
Uncharacterized protein YMR252C	Q04814	1.23882	0.0381667	9	7	0.308965
Uncharacterized protein YOR161C-C	Q8TGS0	1.23856	0.0500592	1	1	0.308661
Ran-specific GTPase-activating protein 2	P40517	1.23736	0.00280572	5	1	0.307265
Probable 1-acyl-sn-glycerol-3-phosphate acyltransferase	P33333	1.23719	0.0544918	9	9	0.307064
Putative uncharacterized protein YDR290W	P87280	1.23629	0.405483	1	1	0.306019
tRNA (cytidine(32)-2'-O)-methyltransferase non-catalytic subunit TRM732	Q03496	1.23582	0.0765586	13	11	0.305473
Putative uncharacterized protein YER135C	P40082	1.23546	0.0914198	3	3	0.305045
Ubiquitin-conjugating enzyme E2 13	P52490	1.23451	0.0321342	3	1	0.303944
Putative platinum sensitivity protein 1	P36082	1.23427	0.26221	1	1	0.303662
Maintenance of telomere capping protein 6	P38849	1.23392	0.0909307	4	4	0.303247
Nitrogen permease regulator 3	P38742	1.23386	0.00300207	9	9	0.303181
60S ribosomal protein L33-B	P41056; P05744	1.23369	0.391781	1	1	0.302983
Mitochondrial genome maintenance protein MGM101	P32787	1.23313	0.344703	2	2	0.30233
Protein AFR1	P33304	1.2331	0.227753	2	2	0.30229
Putative aryl-alcohol dehydrogenase AAD14	P42884	1.23277	0.00266791	11	10	0.301899
Protein MPE1	P35728	1.2318	0.0263439	7	7	0.300769
Signal transduction protein MDG1	P53885	1.23082	0.312238	6	6	0.299616
Protein GRE1	Q08969	1.23005	0.027495	3	3	0.298713
Protein SIP5	P40210	1.23004	0.177262	5	5	0.298707
Zuotin	P32527	1.22969	0.0104336	19	3	0.298293
Uncharacterized protein YIL067C	P40514	1.22961	0.113437	3	3	0.298198
NAD-dependent histone deacetylase HST4	P53688	1.22903	0.0704383	3	3	0.297525
Uncharacterized protein YGL138C	P53122	1.22856	0.217527	22	2	0.296971
Putative uncharacterized protein FYV1	Q99341	1.22805	0.280889	3	2	0.29637
Phosphate metabolism protein 6	Q05637	1.22795	0.090002	3	3	0.296257
Protein SLM4	P38247	1.22589	0.135388	1	1	0.293826
Ubiquitin-conjugating enzyme E2 2	P06104	1.22543	0.0687762	1	1	0.293288
Putative uncharacterized protein JIP3	O13555	1.22435	0.105788	2	2	0.292012
Putative uncharacterized protein YGR137W	P53282	1.22415	0.458405	1	1	0.29178
Grand meiotic recombination cluster protein 2	Q06201	1.22377	0.0587569	2	2	0.291333
Uncharacterized TLC domain-containing protein YPR114W	Q06107	1.22269	0.0605516	2	2	0.29006
ADP,ATP carrier protein 1	P04710	1.22221	0.0422925	2	2	0.289489
Putative uncharacterized protein YPR195C	Q06594	1.22218	0.174304	2	2	0.28946
Ribosome biogenesis protein RLP24	Q07915	1.22175	0.109246	2	2	0.288947
Altered inheritance of mitochondria protein 20	P40451	1.22139	0.300987	1	1	0.28852
NADPH--cytochrome P450 reductase	P16603	1.22124	0.00412138	10	8	0.288349
Uncharacterized protein YNL108C	P53929	1.22119	0.100828	3	3	0.288286
Pre-mRNA-splicing factor SYF1	Q04048	1.22113	0.0770023	13	11	0.288222
RNases MRP/P 32.9 kDa subunit	P38336	1.22103	0.189225	4	3	0.288095
Mediator of RNA polymerase II transcription subunit 10	Q06213	1.22091	0.286282	2	2	0.287956
2-methoxy-6-polyprenyl-1,4-benzoquinol methylase, mitochondrial	P49017	1.22085	0.056401	4	4	0.287884
Protein CAF40	P53829	1.22053	0.0196038	7	6	0.287504
40S ribosomal protein S10-B	P46784; Q08745	1.2204	0.0132072	6	3	0.287357
DNA-directed RNA polymerase II subunit RPB4	P20433	1.22027	0.114687	9	1	0.287196
GPI mannosyltransferase 2	P38211	1.21969	0.0315955	3	3	0.286516
Uncharacterized protein YKR005C	Q02203	1.21969	0.0777887	6	5	0.286514
Uncharacterized protein YIL092W	P40497	1.21963	0.0578956	10	7	0.286439
Succinate dehydrogenase [ubiquinone] cytochrome b subunit, mitochondrial	P33421	1.21847	0.00509996	13	11	0.285068
Protein APA1	P16550	1.21819	0.339703	3	2	0.284744
Signal recognition particle subunit SRP14	P38985	1.21815	0.456025	1	1	0.28469
Glutamyl-tRNA(Gln) amidotransferase subunit A, mitochondrial	Q03557	1.21766	0.0692388	5	4	0.284116
Protein arginine N-methyltransferase HSL7	P38274	1.21727	0.019502	13	10	0.28365
Uncharacterized protein YGR053C	P53234	1.21654	0.0494803	6	6	0.282779
40S ribosomal protein S16-A	P0CX51;P0CX52	1.21634	0.0310752	2	1	0.282552
Putative uncharacterized protein YNL114C	P53926	1.21584	0.461305	1	1	0.281956
Proline utilization trans-activator	P25502	1.21533	0.0538686	4	3	0.281345
Protein HIT1	P46973	1.2148	0.254711	1	1	0.280721
Catalase T	P06115	1.2147	0.0471711	25	11	0.2806
Protein BCP1	Q06338	1.21409	0.0998392	1	1	0.279872
Vacuolar import and degradation protein 22	Q05934	1.21355	0.394737	3	2	0.279236
Non-classical export protein 2	Q12207	1.21316	0.269998	3	1	0.278764
Protein transport protein SEC24	P40482	1.21313	0.0564543	10	8	0.278735
RNA polymerase II subunit B1 CTD phosphatase RTR1	P40084	1.21295	0.373535	3	2	0.278519
Protein GVP36	P40531	1.21279	0.159346	20	5	0.278325
Putative uncharacterized protein YNR042W	P53737	1.21275	0.0898206	1	1	0.278277
N-acetylglucosaminyl-phosphatidylinositol de-N-acetylase	P23797	1.21273	0.110311	2	2	0.278258
Late endosome and vacuole interface protein 11	P53246	1.21204	0.0696677	21	18	0.277443
ER-retained PMA1-suppressing protein 1	P40557	1.21202	0.159881	5	5	0.277414
Invertase 2	P00724	1.21135	0.072247	19	15	0.276617
Uncharacterized protein YPL108W	Q02872	1.21134	0.0705342	2	2	0.276603
Uncharacterized plasma membrane protein YNL194C	P40169	1.21129	0.0777587	6	5	0.276545
Protein VMS1	Q04311	1.21128	0.00791378	9	9	0.276538
Uncharacterized endoplasmic reticulum membrane protein YNL046W	P53956	1.21111	0.508609	3	3	0.276335
CDC25-like phosphatase YCH1	P42937	1.21105	0.129586	3	3	0.276254
Uncharacterized protein YOR238W	Q08634	1.21049	0.199328	3	3	0.275592
Altered inheritance of mitochondria protein 39, mitochondrial	Q08223	1.2104	0.217515	4	4	0.275483
Polyamine transporter 4	Q12256	1.21006	0.0144181	2	2	0.275085
ATP synthase subunit 4, mitochondrial	P05626	1.2093	0.0345847	1	1	0.27417
ER-derived vesicles protein ERV14	P53173	1.20808	0.0785365	3	1	0.272715
Nuclear polyadenylated RNA-binding protein NAB2	P32505	1.20794	0.0434891	25	19	0.272545
Centromere DNA-binding protein complex CBF3 subunit A	P32504	1.20703	0.0280264	17	14	0.271457
Calcium permeable stress-gated cation channel 1	Q06538	1.20685	0.0265868	13	12	0.271249
Factor interacting with REF2	P40020	1.20668	0.032724	18	15	0.271041
tRNA wybutosine-synthesizing protein 4	Q08282	1.20654	0.010483	9	9	0.270876
Uncharacterized protein YCR016W	P25617	1.2055	0.126182	9	9	0.269628
Uncharacterized protein YLL056C	Q12177	1.20512	0.0572277	3	3	0.269179
Porphobilinogen deaminase	P28789	1.20507	0.198338	28	6	0.269118
Urea amidolyase	P32528	1.20501	0.00182841	14	13	0.269045
Probable transcriptional regulatory protein HAH1	P53212	1.20461	0.000546917	1	1	0.268564
Putative uncharacterized protein YGL218W	P53084	1.20443	0.116476	1	1	0.268353
Cytochrome c oxidase assembly protein COX16, mitochondrial	P47081	1.20399	0.134299	1	1	0.267823
Mitochondrial import receptor subunit TOM22	P49334	1.20303	0.00724921	23	2	0.266667
60S ribosomal protein L8-B	P29453; P17076	1.20294	0.145554	2	2	0.266566
Ribonucleoside-diphosphate reductase large chain 1	P21524	1.20241	0.0810531	10	9	0.265934
Serine/threonine-protein kinase BUR1	P23293	1.20181	0.0165868	18	13	0.265213
Mannosyl phosphorylinositol ceramide synthase SUR1	P33300	1.20171	0.0871802	9	8	0.265093
Suppressor of HU sensitivity involved in recombination protein 1	P38751	1.20159	0.196367	1	1	0.264945
mRNA decay factor CTH2	P47977	1.20151	0.0433654	5	4	0.264844
Aspartokinase	P10869	1.20146	0.114508	5	4	0.264791
Protein SCD6	P45978	1.20116	0.176819	10	2	0.264433
Nucleus export protein BRL1	P38770	1.20064	0.0594967	2	2	0.263802
Putative uncharacterized protein YAL042C-A	O13514	1.20022	0.195689	1	1	0.263294
Serine/threonine-protein phosphatase PPQ	P32945	1.19987	0.0439948	5	5	0.262882
Thiosulfate sulfurtransferase RDL1, mitochondrial	Q12305	1.19986	0.194115	16	1	0.262866
Putative uncharacterized protein YJR128W	P47162	1.19896	0.00774198	3	3	0.261783
Kinetochore protein SPC25	P40014	1.19866	0.00783194	5	5	0.261423
Probable ATP-dependent kinase TDA10	P42938	1.19842	0.0365125	7	6	0.261129
Ras-like protein 2	P01120	1.19723	0.363195	2	2	0.259699
Putative uncharacterized protein YEL008W	P40001	1.19714	0.0388181	3	2	0.259594
Inositolphosphotransferase 1	P38954	1.19648	0.0931051	1	1	0.258795
DNA polymerase eta	Q04049	1.19627	0.113666	10	10	0.258539
Pheromone-regulated membrane protein 4	Q12498	1.19586	0.0576637	4	4	0.258047
Homeobox protein TOS8	P53147	1.19552	0.336227	22	2	0.25764
ATP-dependent helicase SGS1	P35187	1.19551	0.0193061	28	21	0.257622
Histone promoter control protein 2	Q01448	1.19458	0.292725	4	4	0.256505
Pre-mRNA-splicing factor ATP-dependent RNA helicase PRP43	P53131	1.19438	0.259253	5	4	0.256262
Manganese resistance protein MNR2	P35724	1.19427	0.152102	6	6	0.256131
Uncharacterized vacuolar membrane protein YML018C	Q03730	1.19379	0.2579	2	2	0.25555
SWI/SNF chromatin-remodeling complex subunit SNF5	P18480	1.1934	0.203512	3	3	0.255084
Putative lipase ROG1	P53118	1.19284	0.127649	17	10	0.254406
Serine/threonine-protein kinase SCH9	P11792	1.19257	0.110666	7	7	0.254074
tRNA-specific adenosine deaminase subunit TAD2	P47058	1.1923	0.021632	5	4	0.253752
Inositol hexakisphosphate and diphosphoinositol-pentakisphosphate kinase	Q06685	1.19217	0.0312182	11	9	0.253592
Putative uncharacterized protein YAR060C	P0CX88	1.19182	0.259522	13	6	0.253164
Phosphate system positive regulatory protein PHO4	P07270	1.19122	0.0182832	6	6	0.252446
Peroxiredoxin TSA1	P34760	1.19031	0.1501	257	13	0.251341
Uncharacterized protein YDR239C	Q03780	1.19024	0.0861986	5	4	0.251247
Putative uncharacterized protein YIL058W	P40521	1.19023	0.239515	1	1	0.251241
ADP-ribose pyrophosphatase	Q01976	1.19022	0.208085	4	4	0.251226
FK506-binding protein 4	Q06205; P38911	1.19019	0.0666	9	1	0.251194
Peroxisomal ATPase PEX6	P33760	1.19007	0.0193078	15	14	0.251045
DNA-directed RNA polymerase III subunit RPC6	P32910	1.18966	0.230358	26	3	0.250552
Protein dopey	Q03921	1.18906	0.37607	16	14	0.249821
Probable trehalase	P35172	1.18894	0.0527115	7	6	0.249681
Protein CASP	P34237	1.18882	0.0769072	13	11	0.24953
Serine/threonine-protein kinase CHK1	P38147	1.18859	0.165578	15	10	0.249251
Elongation factor 1 alpha-like protein	P32769	1.18855	0.0514966	5	5	0.249201
Mitochondrial metalloendopeptidase OMA1	P36163	1.18838	0.0506503	20	18	0.248999
Chitin biosynthesis protein CHS6	P40955	1.18813	0.0154298	11	9	0.248695
Putative uncharacterized protein YPR064W	Q12492	1.18776	0.00869102	1	1	0.248247
Nucleolar protein 12	Q08208	1.18688	0.221652	2	2	0.247177
4-aminobutyrate aminotransferase	P17649	1.18684	0.00903485	10	5	0.247131
N-terminal acetyltransferase 2	P37293	1.18639	0.132392	12	9	0.246581
Uncharacterized protein YER175W-A	Q8TGU4	1.18632	0.0595256	1	1	0.246497
Uncharacterized protein YGL204C	P53089	1.18598	0.447285	1	1	0.246079
Pre-mRNA-splicing factor SAD1	P43589	1.18565	0.126278	3	3	0.245682
Aminopeptidase Y	P37302	1.18522	0.0312894	10	2	0.245154
TY1 enhancer activator	P47988	1.18464	0.0421813	9	8	0.244452
Uncharacterized protein YDR374W-A	Q2V2P8	1.18446	0.333155	2	2	0.244227
NADPH-dependent aldose reductase GRE3	P38715	1.18417	0.036434	4	4	0.243874
ABC transporter ATP-binding protein/permease VMR1	P38735	1.18364	0.03198	13	11	0.243235
GDP-Man:Man(3)GlcNAc(2)-PP-Dol alpha-1,2-mannosyltransferase	P53954	1.1832	0.0159702	9	6	0.242693
Heat shock protein SSB1	P11484	1.18309	0.118921	43	1	0.242561
Uncharacterized acyltransferase YDR018C	Q12185	1.18265	0.0716745	6	6	0.242025
Low-affinity methionine permease	P38734	1.18224	0.110012	4	4	0.241523
Protein phosphatase 2C homolog 7, mitochondrial	P38797	1.18215	0.0816654	6	5	0.241414
Eukaryotic translation initiation factor 2A	P53235	1.18213	0.1441	5	5	0.241388
SPS-sensor component SSY1	Q03770	1.18159	0.00950887	7	7	0.240735
Endo-1,3(4)-beta-glucanase 1	P53753	1.18152	0.270656	1	1	0.240644
Putative uncharacterized protein YOR314W-A	P0C5R0	1.18058	0.0142575	3	2	0.239495
High osmolarity signaling protein SHO1	P40073	1.18051	0.126765	1	1	0.239409
tRNA (guanine(26)-N(2))-dimethyltransferase, mitochondrial	P15565	1.18038	0.106678	9	5	0.239257
Putative uncharacterized protein YCL042W	P25572	1.18022	0.391533	1	1	0.239052
Protein transport protein SSS1	P35179	1.18005	0.0771778	10	1	0.238847
54S ribosomal protein L27, mitochondrial	P36526	1.17943	0.0541584	5	5	0.238093
Pre-mRNA-processing factor 39	P39682	1.17943	0.120003	8	6	0.238091
ATP-dependent helicase HRQ1	Q05549	1.17897	0.00577228	26	21	0.237528
Protein BOI2	P39969	1.17893	0.00324306	10	9	0.237483
Sphingolipid long chain base-responsive protein LSP1	Q12230	1.17874	0.0861953	22	6	0.237245
Probable DNA-binding protein SNT1	P25357	1.17842	0.0248256	35	23	0.236859
Translation initiation factor eIF-2B subunit epsilon	P32501	1.17816	0.0756632	5	5	0.236529
60S ribosomal protein L9-A	P05738	1.17763	0.167966	24	4	0.235891
Protein ESC8	Q08119	1.17729	0.00596507	14	9	0.235466
SIT4-associating protein SAP185	P40856	1.17673	0.252362	3	3	0.23478
Eukaryotic translation initiation factor 5A-1	P23301	1.17654	0.427296	2	2	0.234556
Glyceraldehyde-3-phosphate dehydrogenase 1	P00360	1.17625	0.0932705	81	28	0.234199
40S ribosomal protein S27-B	P38711; P35997	1.17612	0.212139	1	1	0.234033
Zinc finger protein STP4	Q07351	1.17545	0.0218386	8	7	0.233212
Putative uncharacterized protein YFL019C	P43576	1.17538	0.0786869	1	1	0.233122
Pre-mRNA-splicing factor PRP9	P19736	1.17538	0.194183	17	11	0.233122
Family of serine hydrolases 1	P38777	1.17524	0.116794	2	1	0.23296
4-hydroxy-4-methyl-2-oxoglutarate aldolase	P40011	1.1752	0.232553	3	3	0.232908
Protoplast secreted protein 2	Q12335; P25349	1.17517	0.33625	29	1	0.232869
Hypoxanthine-guanine phosphoribosyltransferase	Q04178	1.17485	0.0213918	3	3	0.232472
U1 small nuclear ribonucleoprotein C	Q05900	1.17484	0.152083	2	2	0.23247
Glucose N-acetyltransferase 1	Q12096	1.17444	0.0643622	9	5	0.231969
Deoxyribonuclease Tat-D	P34220	1.17413	0.0361969	5	5	0.231594
E3 ubiquitin-protein ligase RSP5	P39940	1.1741	0.0257044	10	9	0.23155
Vacuolar amino acid transporter 1	P47082	1.17391	0.0123089	5	4	0.23132
Mitochondrial translation factor ATP22	P50273	1.1735	0.0195329	23	19	0.230816
Vacuolar-sorting protein SNF7	P39929	1.17337	0.17716	9	2	0.230654
DNA repair and recombination protein RDH54	P38086	1.17244	0.186268	15	12	0.22952
Mediator of RNA polymerase II transcription subunit 20	P34162	1.1722	0.240668	2	1	0.229219
Branched-chain-amino-acid aminotransferase, mitochondrial	P38891	1.17216	0.02377	3	1	0.229175
Uncharacterized glycosyl hydrolase YIR007W	P40566	1.17216	0.150342	13	12	0.229166
Farnesyl pyrophosphate synthase	P08524	1.1721	0.0673833	6	6	0.229101
Uncharacterized protein YGL258W-A	Q3E740	1.17207	0.047447	5	5	0.229062
U3 small nucleolar RNA-associated protein 21	Q06078	1.17174	0.173725	9	7	0.228651
Metal homeostasis factor ATX1	P38636	1.17164	0.228165	1	1	0.228535
ISWI one complex protein 3	P43596	1.1713	0.0677795	5	5	0.228109
Protein SNA3	P14359	1.17121	0.0292717	4	3	0.228001
Serine/threonine-protein phosphatase PP-Z1	P26570	1.17119	0.0439609	27	13	0.22798
Negative regulator of sporulation PMD1	P32634	1.17102	0.0480025	12	11	0.227766
60S ribosomal protein L10	P41805	1.17017	0.0339143	9	8	0.226715
Protein CFT1	Q06632	1.17008	0.00439152	8	6	0.226611
Uncharacterized protein YJR061W	P40355	1.17004	0.459508	9	9	0.226562
Protein YOP1	Q12402	1.16992	0.0863696	63	3	0.226407
E3 SUMO-protein ligase MMS21	P38632	1.16959	0.134398	1	1	0.226001
60S ribosomal protein L31-A	P0C2H8; P0C2H9	1.16949	0.235674	3	2	0.225883
UPF0744 protein YSC83	P32792	1.16949	0.0880449	2	2	0.225876
Rho-GTPase-activating protein BAG7	Q12128	1.16896	0.0362672	6	5	0.225224
Putative guanine nucleotide-exchange factor SED4	P25365	1.16856	0.108291	9	7	0.224726
Ubiquitin carboxyl-terminal hydrolase 15	P50101	1.16831	0.0146639	10	10	0.22442
25S rRNA (adenine(645)-N(1))-methyltransferase	P38961	1.16829	0.262643	5	5	0.224403
Cell division control protein KAR1	P11927	1.1681	0.0913099	7	6	0.22416
Multifunctional tryptophan biosynthesis protein	P00937	1.16795	0.175798	7	6	0.223979
Mitochondrial morphogenesis protein SLD7	Q08457	1.16774	0.427005	4	4	0.223722
Phospholipase D1	P36126	1.1677	0.0121612	22	18	0.22367
Sorbitol dehydrogenase 1	P35497	1.16769	0.129263	6	4	0.223655
S-(hydroxymethyl)glutathione dehydrogenase	P32771	1.16694	0.0313025	22	4	0.222725
40S ribosomal protein S7-A	P26786	1.16688	0.0885241	5	3	0.22265
G2/mitotic-specific cyclin-4	P24871	1.1668	0.0649481	6	6	0.22256
Transaminated amino acid decarboxylase	Q06408	1.16678	0.0539289	5	5	0.22253
Protein MSS51, mitochondrial	P32335	1.16654	0.180299	5	5	0.222239
CDP-diacylglycerol--glycerol-3-phosphate 3-phosphatidyltransferase	P25578	1.16639	0.493975	3	3	0.222056
54S ribosomal protein L7, mitochondrial	P36519	1.1662	0.0529516	2	2	0.221819
Protein transport protein SBH1	P52870	1.16612	0.285767	1	1	0.221722
Asparagine-rich protein	P32770	1.16514	0.155672	4	4	0.220505
Cytochrome b-c1 complex subunit 6	P00127	1.16511	0.343429	1	1	0.220463
Uncharacterized hydrolase YNR064C	P53750	1.1647	0.0370382	8	6	0.219953
Putative uncharacterized protein Q0092, mitochondrial	Q35811	1.16469	0.491538	1	1	0.219944
Protein UPS3, mitochondrial	Q04006	1.1645	0.0803442	3	3	0.219708
Uncharacterized protein YDR114C	Q04597	1.16445	0.253666	2	2	0.219648
Transcription initiation factor TFIID subunit 11	Q04226	1.16406	0.0844064	3	3	0.219164
Pre-mRNA-splicing factor CWC22	P53333	1.16387	0.0745247	8	6	0.218934
Zinc finger transcription factor YRM1	Q12340	1.1637	0.0178496	11	9	0.218714
Fatty acyl-CoA synthetase and RNA processing-associated kinase 1	Q03002	1.16307	0.0442421	6	6	0.21794
Uracil permease	P05316	1.16307	0.249835	3	3	0.217932
40S ribosomal protein S12	P48589	1.16294	0.112479	25	4	0.217774
Vacuolar protein sorting-associated protein IST1	P53843	1.1626	0.114934	3	3	0.217356
40S ribosomal protein S14-A	P06367	1.16177	0.0855923	1	1	0.216329
DUP240 protein YAR028W	P39548	1.16152	0.294509	1	1	0.216018
54S ribosomal protein RML2, mitochondrial	P32611	1.16126	0.180911	4	4	0.215696
Transcription factor SFP1	P32432	1.16046	0.145975	4	4	0.214703
6,7-dimethyl-8-ribityllumazine synthase	P50861	1.16027	0.0179232	4	2	0.214459
Protein disulfide-isomerase	P17967	1.16005	0.0241638	119	19	0.214186
Nucleolar complex protein 14	Q99207	1.15993	0.14438	7	7	0.21404
Restriction of telomere capping protein 5	Q12108	1.15954	0.0173561	12	9	0.213554
Cytoplasmic export protein 1	Q12453	1.15929	0.178027	14	6	0.213242
Barrierpepsin	P12630	1.15914	0.0639411	5	4	0.213057
Lipid phosphate phosphatase 1	Q04396	1.15911	0.152348	2	1	0.213022
Serine/threonine-protein kinase Haspin homolog ALK2	P32789	1.15859	0.143631	30	9	0.212366
Probable glycosidase CRR1	Q05790	1.15844	0.105389	8	6	0.212188
Uncharacterized protein YNL146W	P53906	1.15834	0.389874	2	2	0.212062
Protein YGP1	P38616	1.15809	0.412513	1	1	0.21175
Uncharacterized membrane protein YGL140C	P53120	1.15786	0.130809	22	16	0.211457
Carboxypeptidase Y inhibitor	P14306	1.15745	0.0770935	2	2	0.210944
Spindle assembly checkpoint component MAD1	P40957	1.15733	0.0616168	11	7	0.210803
Autophagy-related protein 38	Q05789	1.15727	0.201967	4	4	0.210726
Pre-mRNA-splicing factor CWC25	P53854	1.15721	0.119255	1	1	0.210653
60S ribosomal protein L23-B	P0CX42;P0CX41	1.15709	0.0475379	1	1	0.210506
Uncharacterized protein YLR283W, mitochondrial	Q05867	1.15679	0.0632151	6	4	0.210132
Chromatin-remodeling complex subunit IES6	P32617	1.15672	0.127058	1	1	0.210036
tRNA:m(4)X modification enzyme TRM13	Q12383	1.15614	0.251745	9	8	0.209318
Protein BSP1	Q06604	1.15605	0.0309234	10	6	0.209208
Tryptophan--tRNA ligase, cytoplasmic	Q12109	1.15547	0.244146	6	6	0.208476
NADPH-dependent diflavin oxidoreductase 1	Q12181	1.15496	0.151369	11	10	0.207838
DNA-binding protein REB1	P21538	1.15442	0.0873909	17	16	0.207163
Putative uncharacterized protein YLR269C	O13550	1.15353	0.200293	1	1	0.20605
Uncharacterized protein YGR273C	P53329	1.15348	0.0433603	5	5	0.205993
Mitochondrial zinc maintenance protein 1, mitochondrial	Q03429	1.15344	0.0226974	1	1	0.205942
Rab proteins geranylgeranyltransferase component A	P32864	1.15334	0.0391871	5	4	0.205819
J domain-containing protein 1	Q12350	1.15323	0.162924	2	2	0.205686
Uncharacterized protein YDR366C	Q06137	1.15311	0.00275009	6	5	0.205524
Probable transporter AQR1	P53943	1.15306	0.164085	2	2	0.205464
Cell division control protein 53	Q12018	1.15281	0.0598298	7	7	0.205157
Benzil reductase ((S)-benzoin forming) IRC24	P40580	1.15265	0.0968503	14	8	0.20495
Ribosome biogenesis protein UTP30	P36144	1.15263	0.245638	2	2	0.204925
Methionyl-tRNA formyltransferase, mitochondrial	P32785	1.15235	0.0601184	24	21	0.204574
2-deoxy-glucose resistant protein 1, mitochondrial	Q3E808	1.15224	0.0153933	1	1	0.20444
60S ribosomal protein L32	P38061	1.15219	0.0488801	4	4	0.204378
Sporulation-specific protein 73	P40031	1.15215	0.420081	2	2	0.204332
Phosphatidylinositol N-acetylglucosaminyltransferase GPI3 subunit	P32363	1.15202	0.690953	1	1	0.204161
pH-response regulator protein palF/RIM8	P53179	1.15179	0.104659	6	6	0.203876
Glutathione-specific gamma-glutamylcyclotransferase	P32656	1.15177	0.490391	1	1	0.203853
Protein FMP49, mitochondrial	A0A023PZB3	1.15172	0.260661	2	2	0.203793
Glutamine--tRNA ligase	P13188	1.15162	0.165737	36	1	0.20366
Prefoldin subunit 3	P48363	1.15132	0.344546	4	1	0.203283
Vacuolar protein sorting-associated protein VTA1	Q06263	1.15104	0.0608074	3	3	0.202932
60S acidic ribosomal protein P2-beta	P02400	1.15101	0.0230201	23	4	0.2029
mRNA export factor MEX67	Q99257	1.15087	0.0533821	7	5	0.20272
Zinc finger protein YPR015C	Q12531	1.15081	0.405098	1	1	0.202652
Mitochondrial carrier protein LEU5	P38702	1.15041	0.153939	2	2	0.202154
Tricalbin-2	P48231	1.15041	0.0734508	20	14	0.202146
Protein STU2	P46675	1.15034	0.00501017	8	7	0.202065
Uncharacterized membrane protein YHL071W	P38745	1.15023	0.171191	5	5	0.201921
Heat shock protein SSQ1, mitochondrial	Q05931	1.15023	0.0531988	9	8	0.201919
Serine/threonine-protein kinase CLA4	P48562	1.1499	0.0193224	7	7	0.201503
ATP-dependent helicase NAM7	P30771	1.14975	0.00546629	12	11	0.201319
Single-stranded DNA-binding protein RIM1, mitochondrial	P32445	1.14941	0.382223	10	3	0.200899
TEL2-interacting protein 2	P47168	1.14899	0.0463621	10	10	0.200372
Metallothionein expression activator	P21192	1.14891	0.0535189	13	10	0.200266
U6 snRNA-associated Sm-like protein LSm7	P53905	1.14886	0.021475	17	10	0.200208
Phosphatidate cytidylyltransferase, mitochondrial	P53230	1.14882	0.126493	3	3	0.200152
Meiotic recombination protein REC8	Q12188	1.14872	0.0284261	10	9	0.20003
Uncharacterized protein YDR169C-A	Q3E789	1.14858	0.153522	1	1	0.199852
Peroxisomal biogenesis factor 8	P53248	1.14854	0.0133275	6	4	0.199804
Uncharacterized protein YBR126W-A	Q8TGU7	1.14854	0.132428	3	1	0.199802
Cysteine desulfurase, mitochondrial	P25374	1.14847	0.0868633	10	7	0.199716
Serine/threonine-protein kinase STE11	P23561	1.14827	0.00870907	14	13	0.199456
Ubiquitin-like protein SMT3	Q12306	1.14819	0.165278	12	2	0.199363
Asparagine--tRNA ligase, cytoplasmic	P38707	1.14811	0.0315593	15	2	0.19926
tRNA wybutosine-synthesizing protein 2	Q04235	1.14783	0.362397	7	6	0.198904
Transcription initiation factor TFIID subunit 6	P53040	1.14763	0.00152144	12	4	0.198659
Uncharacterized protein YPR147C	Q06522	1.14763	0.113555	5	4	0.198653
Purine-cytosine permease FCY21	P40039	1.14751	0.136405	3	3	0.198509
Uncharacterized protein YNL184C	P53876	1.14704	0.309463	5	4	0.197915
Mitochondrial-processing peptidase subunit beta	P10507	1.14656	0.15841	11	9	0.19731
Protein STB1	P42845	1.14608	0.182986	3	3	0.196712
Putative uncharacterized membrane protein YAL059C-A	A0A023PYD0	1.14597	0.232924	1	1	0.196565
Uncharacterized protein YJL043W	P47053	1.14574	0.251079	2	2	0.196276
E3 ubiquitin-protein ligase TOM1	Q03280	1.14549	0.240027	45	36	0.195969
Tricalbin-1	Q12466	1.14543	0.301234	14	7	0.195885
Phosphate permease PHO89	P38361	1.14538	0.271125	4	4	0.195827
ER degradation-enhancing alpha-mannosidase-like protein 1	P38888	1.14529	0.295494	5	4	0.195711
37S ribosomal protein RSM18, mitochondrial	P40033	1.14498	0.506005	1	1	0.195319
Protein TOS4	Q06266	1.14475	0.0244923	6	6	0.195032
Vacuolar protein sorting/targeting protein VPS10	P32319	1.14471	0.0986983	9	8	0.194977
Uncharacterized protein YLR036C	Q07986	1.14415	0.0691295	4	4	0.194282
Putative uncharacterized oxidoreductase YDR541C	Q03049	1.14413	0.0262329	1	1	0.194251
Actin-like protein ARP9	Q05123	1.14383	0.35673	4	4	0.193879
Nicotinamide/nicotinic acid mononucleotide adenylyltransferase 1	Q06178	1.1438	0.19809	7	3	0.193839
Nucleoside diphosphate kinase	P36010	1.14363	0.149855	9	2	0.19362
Putative metallophosphoesterase YNL217W	P40152	1.1436	0.392916	4	3	0.193577
Chromo domain-containing protein 1	P32657	1.14357	0.354346	26	26	0.193543
Putative uncharacterized protein YMR158W-B	Q6B0X2	1.14342	0.187335	2	2	0.19336
Peptide transporter PTR2	P32901	1.14328	0.0401248	4	3	0.193178
Protein PET117, mitochondrial	Q02771	1.14242	0.144808	2	2	0.192088
DNA mismatch repair protein PMS1	P14242	1.14197	0.131583	10	9	0.191526
Sorting nexin-41	Q04053	1.14193	0.0438627	5	5	0.191476
U1 SNP1-associating protein 1	Q03714	1.14177	0.214363	8	5	0.19127
Exportin-T	P33418	1.14128	0.0634805	12	8	0.190655
Protein kinase-like protein SCY1	P53009	1.14121	0.00995534	4	4	0.190569
Putative uncharacterized protein YOR364W	Q08842	1.14117	0.00358403	7	5	0.190513
Probable electron transfer flavoprotein-ubiquinone oxidoreductase, mitochondrial	Q08822	1.14116	0.109142	27	6	0.190502
RNA polymerase I-specific transcription initiation factor RRN10	P38204	1.14112	0.231651	2	2	0.190453
Mediator of RNA polymerase II transcription subunit 22	P32570	1.14104	0.113993	6	5	0.190352
Importin subunit beta-2	P38217	1.14104	0.531104	1	1	0.190352
Intron-encoded endonuclease I-SceI	P03882	1.14091	0.330706	2	2	0.190181
Proteasome subunit alpha type-1	P21243	1.14078	0.051698	7	7	0.190015
Nuclear mRNA export protein THP1	Q08231	1.14068	0.120909	2	2	0.189894
Mitochondrial outer membrane protein OM45	P16547	1.14036	0.192277	18	1	0.189488
Mitotic spindle checkpoint component MAD2	P40958	1.14027	0.137586	4	4	0.189376
Sporulation-specific wall maturation protein	P13130	1.14012	0.510985	1	1	0.189189
Protein PDC2	P32896	1.14	0.195138	3	3	0.189034
Transcription initiation factor TFIID subunit 5	P38129	1.13946	0.441549	8	6	0.188354
Serine/threonine-protein kinase STE7	P06784	1.13906	0.268133	3	2	0.187849
Probable metalloprotease ARX1	Q03862	1.13903	0.0333312	5	4	0.187799
Phosducin-like protein 1	Q04004	1.13886	0.463719	1	1	0.187589
Altered inheritance of mitochondria protein 46, mitochondrial	P38885	1.13865	0.164065	2	2	0.18732
Potassium-activated aldehyde dehydrogenase, mitochondrial	P46367	1.13836	0.184362	9	2	0.186951
Dolichyl-phosphate-mannose--protein mannosyltransferase 2	P31382	1.1382	0.220831	2	2	0.186749
Mitochondrial outer membrane protein porin 1	P04840	1.13811	0.106954	13	2	0.186637
tRNA ligase	P09880	1.13803	0.0704507	13	12	0.186545
Elongation factor 1-alpha	P02994	1.13741	0.0761699	284	17	0.185754
Cell wall protein TIR4	Q12218	1.13725	0.0513085	2	2	0.185555
Mitochondrial inner membrane protein OXA1	P39952	1.1368	0.056523	7	7	0.184977
Protein VTS1	Q08831	1.1364	0.306477	4	3	0.184473
Alanine--tRNA ligase, mitochondrial	P40825	1.1361	0.115528	31	3	0.184095
ATP-dependent RNA helicase DBP7	P36120	1.13597	0.378498	28	11	0.18393
Transketolase 2	P33315	1.13582	0.0776572	9	9	0.183736
Probable transcription repressor protein RGM1	Q00453	1.13582	0.445379	4	4	0.18373
DNA replication complex GINS protein PSF3	Q12146	1.13573	0.266922	5	5	0.183619
Seventh homolog of septin 1	Q07657	1.13556	0.0207302	7	5	0.1834
Cargo-transport protein YPP1	P46951	1.1355	0.00296062	19	15	0.183325
EST/SMG-like protein 1	P36168	1.13537	0.00945021	26	21	0.183158
Protein ILM1	P47155	1.13535	0.417624	2	1	0.183139
Hexokinase-2	P04807	1.13502	0.185413	25	9	0.182714
H/ACA ribonucleoprotein complex subunit 4	P33322	1.13473	0.219167	13	2	0.182354
5-demethoxyubiquinone hydroxylase, mitochondrial	P41735	1.13461	0.0885525	1	1	0.182192
Putative uncharacterized protein VPS61	Q03913	1.1342	0.527147	4	3	0.181679
Nitrogen regulatory protein DAL80	P26343	1.13362	0.239542	1	1	0.180941
Condensin complex subunit 2	P38170	1.13358	0.163984	3	3	0.180885
Peroxisomal biogenesis factor 2	P32800	1.13341	0.39303	2	2	0.180669
Cell division control protein 1	P40986	1.13328	0.271523	4	4	0.1805
Polyphosphatidylinositol phosphatase INP52	P50942	1.13324	0.119901	10	9	0.180455
Uncharacterized membrane protein YMR253C	Q04835	1.13234	0.302886	3	2	0.179305
Ribosome quality control complex subunit 2	Q12532	1.13206	0.137161	9	7	0.178956
Recyclin-1	P39531	1.13197	0.156541	10	10	0.178842
Glucan 1,3-beta-glucosidase	P15703	1.13141	0.0690738	16	4	0.178116
Methylthioribulose-1-phosphate dehydratase	P47095	1.13134	0.196705	1	1	0.178039
Polynucleotide 5'-hydroxyl-kinase GRC3	Q07845	1.13105	0.398759	9	7	0.177657
Pyridoxamine 5'-phosphate oxidase	P38075	1.13092	0.328443	20	3	0.177496
Target of rapamycin complex subunit LST8	P41318	1.13087	0.288383	5	5	0.177429
UBX domain-containing protein 1	P34223	1.13036	0.0110293	33	8	0.176786
Central kinetochore subunit CHL4	P38907	1.13019	0.11327	13	10	0.176564
E3 ubiquitin-protein ligase PEP5	P12868	1.13019	0.289466	3	3	0.176561
Pentatricopeptide repeat-containing protein PET309, mitochondrial	P32522	1.13014	0.00239152	16	13	0.176506
Myosin tail region-interacting protein MTI1	P47068	1.13012	0.0112638	14	14	0.176473
Carboxypeptidase S	P27614	1.12993	0.412411	3	3	0.176227
Serine/threonine-protein kinase AKL1	P38080	1.12991	0.0841461	15	13	0.176209
Synaptonemal complex protein ZIP1	P31111	1.12988	0.0457947	18	14	0.176173
ATP-dependent DNA helicase MER3	P51979	1.1297	0.117035	28	21	0.175935
Probable 26S proteasome regulatory subunit p27	P40555	1.1296	0.129932	4	4	0.175811
Metal-binding activator 1	P35192	1.12958	0.111064	4	4	0.175787
Replication factor C subunit 1	P38630	1.12957	0.00225163	19	15	0.175773
Mitochondrial DnaJ homolog 2	P42834	1.1294	0.0559164	5	4	0.17556
Spore membrane assembly protein 2	Q04658	1.12904	0.103765	1	1	0.175097
Exosome complex component RRP4	P38792	1.12895	0.0874625	3	3	0.174986
Pantoate--beta-alanine ligase	P40459	1.12885	0.276607	8	7	0.17485
Uncharacterized protein YJL118W	P47022	1.12873	0.126048	8	6	0.174696
54S ribosomal protein L4, mitochondrial	P36517	1.12866	0.00403875	5	5	0.174608
Nucleoporin NUP53	Q03790	1.12844	0.102704	2	1	0.174334
Casein kinase I homolog 2	P23292	1.12816	0.384964	5	5	0.173966
Epsin-3	P47160	1.12773	0.147265	3	3	0.173415
Restriction of telomere capping protein 3	P38804	1.12745	0.236404	2	1	0.173059
Activator of stress genes 1	P40467	1.12731	0.119707	6	6	0.172883
Putative regulator of rDNA transcription protein 16	P50943	1.12729	0.157914	2	1	0.172857
Uncharacterized protein YLR149C	Q99296	1.12727	0.159233	2	2	0.172828
Rho1 guanine nucleotide exchange factor TUS1	Q06412	1.12695	0.00481773	19	15	0.172424
26S proteasome regulatory subunit RPN13	O13563	1.12687	0.104971	6	2	0.172316
Protein STB6	P36085	1.12685	0.187638	14	14	0.172296
Pyruvate dehydrogenase E1 component subunit alpha, mitochondrial	P16387	1.12675	0.0846798	2	2	0.172166
Mitochondrial outer membrane protein OM14	P38325	1.12668	0.108218	2	2	0.172074
Putative oxidoreductase TDA3	P38758	1.12659	0.0366858	2	2	0.17196
Kinetochore-associated protein NSL1	Q12143	1.12631	0.152857	2	2	0.171599
Pre-mRNA-splicing factor ATP-dependent RNA helicase-like protein PRP2	P20095	1.12621	0.0164249	18	16	0.171476
tRNA(Thr) (cytosine(32)-N(3))-methyltransferase	Q08641	1.12618	0.0279366	20	15	0.171434
Protein ERP5	P38819	1.12607	0.26731	1	1	0.171298
Eukaryotic translation initiation factor 5B	P39730	1.12577	0.31898	12	1	0.170914
GTP-binding nuclear protein GSP2/CNR2	P32836; P32835	1.12549	0.00631753	3	2	0.170555
Protein CWH43	P25618	1.12519	0.157364	8	3	0.170168
Mitochondrial distribution and morphology protein 10	P18409	1.12516	0.26109	8	7	0.170136
Mitochondrial chaperone TCM62	P38228	1.12492	0.0775458	5	5	0.169818
Ubiquitin-binding protein CUE5	Q08412	1.12479	0.404513	11	11	0.169654
Niemann-Pick type C-related protein 1	Q12200	1.12474	0.123286	7	7	0.169587
Vacuolar protein sorting-associated protein 45	P38932	1.12429	0.360587	7	6	0.169014
UBA domain-containing protein RUP1	Q12242	1.12424	0.145612	12	11	0.168945
ATP synthase subunit beta, mitochondrial	P00830	1.12411	0.0178445	19	5	0.168779
DNA polymerase epsilon subunit B	P24482	1.12406	0.242357	8	8	0.168725
RNA annealing protein YRA1	Q12159	1.12403	0.328258	22	3	0.168687
Required for respiratory growth protein 1, mitochondrial	Q12167	1.12333	0.0247769	5	5	0.167785
Putative pyridoxal kinase BUD17	P53727	1.12303	0.0168199	2	2	0.167402
Glutamine--fructose-6-phosphate aminotransferase [isomerizing]	P14742	1.12301	0.0197088	9	8	0.167372
Putative uncharacterized membrane protein YMR316C-B	A0A023PXQ9	1.12289	0.129435	1	1	0.167216
Hexose transporter HXT8	P40886	1.12281	0.142187	9	9	0.167112
Pre-rRNA-processing protein RIX1	P38883	1.12253	0.243921	4	4	0.166751
Altered inheritance of mitochondria protein 18, mitochondrial	P38884	1.1222	0.175445	3	3	0.16633
GPI transamidase component GAB1	P41733	1.1221	0.0553986	1	1	0.166204
Serine/threonine-protein phosphatase PP2A-like PPG1	P32838	1.12207	0.0704471	1	1	0.166163
2-deoxy-glucose resistant protein 2	P32330	1.12202	0.0810141	5	5	0.166096
Mitochondrial distribution and morphology protein 36	Q06820	1.1218	0.322595	3	3	0.165819
Peroxisomal hydratase-dehydrogenase-epimerase	Q02207	1.12173	0.0682823	17	16	0.165721
Sterol esterase 2	Q07950	1.12162	0.100023	6	6	0.165578
Retrograde regulation protein 2	P32608	1.12135	0.379953	9	8	0.165234
Enolase-phosphatase E1	P32626	1.12127	0.00700752	1	1	0.165135
Peptidyl-prolyl cis-trans isomerase D	P35176	1.12095	0.015919	25	8	0.164724
Peroxisomal membrane protein PEX25	Q02969	1.12086	0.00181065	13	5	0.16461
Exocyst complex component SEC8	P32855	1.12066	0.102848	23	17	0.164346
Ribosome assembly protein RRB1	Q04225	1.12058	0.502219	2	2	0.164248
Mitochondrial intermembrane space import and assembly protein 40	P36046	1.12051	0.0753298	3	1	0.164161
Replication factor A protein 3	P26755	1.12044	0.365936	1	1	0.164066
GTPase MTG2, mitochondrial	P38860	1.12042	0.167675	17	9	0.164041
Anaphase-promoting complex subunit 1	P53886	1.12033	0.175887	17	15	0.163926
Dolichol-phosphate mannosyltransferase	P14020	1.12025	0.00530887	14	12	0.163822
Protein FMP25, mitochondrial	Q08023	1.11994	0.205213	3	3	0.163421
Negative RAS protein regulator protein	P23250	1.11991	0.17303	2	2	0.163378
U3 small nucleolar RNA-associated protein 8	P53276	1.11985	0.150792	12	12	0.163301
Serine/threonine-protein kinase DBF20	P32328	1.11973	0.0182386	14	12	0.163155
Ribosome biogenesis protein NSA1	P53136	1.11957	0.0705377	8	7	0.162941
Hsp90 co-chaperone AHA1	Q12449	1.11945	0.0342048	14	3	0.162788
Increased rDNA silencing protein 4	P36115	1.11937	0.0513979	16	6	0.162686
Uncharacterized protein YGL235W	P53071	1.1193	0.0984919	3	1	0.162597
Lysophospholipase 1	P39105	1.11927	0.181275	2	2	0.162556
Probable di- and tripeptidase DUG2	P38149	1.11898	0.0296744	13	12	0.162184
U1 small nuclear ribonucleoprotein component SNU71	P53207	1.11871	0.00284397	18	12	0.161838
Protein VHS2	P40463	1.11855	0.405406	1	1	0.161626
Putative truncated guanine nucleotide exchange factor SDC25	P0CF34	1.11838	0.0064503	8	6	0.161407
Putative uncharacterized protein YOR345C	Q08811	1.11807	0.0315284	1	1	0.161015
Oxidation resistance protein 1	Q08952	1.11782	0.405498	3	3	0.160686
Putative pterin-4-alpha-carbinolamine dehydratase	P38744	1.11774	0.161983	3	2	0.160581
Putative uncharacterized protein YJR018W	P47091	1.11754	0.211152	2	2	0.160331
Uncharacterized transcriptional regulatory protein YFL052W	P43551	1.11741	0.120111	5	4	0.160159
Serine/threonine-protein kinase ELM1	P32801	1.11734	0.176219	7	6	0.160068
Lysine--tRNA ligase, cytoplasmic	P15180	1.1173	0.198894	13	1	0.160011
Ankyrin repeat-containing protein YGL242C	P53066	1.11715	0.420209	2	1	0.159817
tRNA-splicing endonuclease subunit SEN54	Q02825	1.11695	0.253927	5	5	0.159564
Maintenance of telomere capping protein 2	P34246	1.11683	0.381292	2	2	0.159415
Vacuolar protein sorting-associated protein 1	P21576	1.11659	0.195254	14	1	0.159106
Phospho-2-dehydro-3-deoxyheptonate aldolase, phenylalanine-inhibited	P14843	1.11619	0.35158	9	6	0.158578
Ribonucleotide reductase inhibitor protein SML1	Q04964	1.11612	0.116844	5	4	0.158498
Ubiquitin-binding protein CUE2	P36075	1.11612	0.0811546	3	3	0.158488
Hexose transporter HXT16	P47185	1.11577	0.328373	2	2	0.158045
CTD kinase subunit gamma	P46963	1.11571	0.105966	3	3	0.157965
Endonuclease III homolog 1	P31378	1.11535	0.251618	10	9	0.157492
Actin-related protein 2/3 complex subunit 5	P40518	1.1149	0.0193671	18	5	0.156919
IMPACT family member YDL177C	Q12257	1.11474	0.0322808	7	6	0.156703
Transcriptional regulator MET32	Q12041	1.11434	0.437535	4	3	0.156187
Protein SDS23	P53172	1.11432	0.436915	3	3	0.156158
tRNA acetyltransferase TAN1	P53072	1.11422	0.436024	6	6	0.156028
Amino-acid acetyltransferase, mitochondrial	P40360	1.11381	0.391032	29	9	0.1555
60S ribosomal protein L15-A	P05748	1.11379	0.0602356	6	6	0.155484
tRNA (adenine(58)-N(1))-methyltransferase catalytic subunit TRM61	P46959	1.11371	0.0160511	10	9	0.15538
Transcriptional activator of sulfur metabolism MET4	P32389	1.1137	0.0692268	7	6	0.15536
Choline kinase	P20485	1.11367	0.122829	6	6	0.155326
Protein MAK16	P10962	1.11354	0.0336804	4	3	0.155154
Sorting nexin MVP1	P40959	1.11342	0.201711	7	7	0.154991
Structural maintenance of chromosomes protein 2	P38989	1.11333	0.0380052	17	15	0.154879
Putative uncharacterized protein YML084W	Q04521	1.11327	0.00233744	2	1	0.154803
40S ribosomal protein S3	P05750	1.11292	0.0471983	14	10	0.154354
U3 small nucleolar ribonucleoprotein protein LCP5	P40079	1.11256	0.606371	4	3	0.153885
Putative vacuolar protein sorting-associated protein TDA6	Q06466	1.11248	0.672558	1	1	0.153778
Uncharacterized transcriptional regulatory protein YLL054C	Q12244	1.11247	0.13436	11	10	0.153768
Mitochondrial carrier protein MTM1	P53320	1.11242	0.296735	5	3	0.153702
Vacuolar cation-transporting ATPase YPK9	Q12697	1.11235	0.0761174	19	16	0.153605
Trans-aconitate 3-methyltransferase	P32643	1.11229	0.0103132	10	8	0.153535
Alkaline ceramidase YPC1	P38298	1.11228	0.210643	2	2	0.153525
Autophagy-related protein 29	Q12092	1.11222	0.2075	2	2	0.153442
Sterol O-acyltransferase 1	P25628	1.11162	0.124296	5	5	0.15267
Protein PAR32	Q12515	1.11161	0.172235	1	1	0.152647
Uncharacterized membrane protein YOL073C	Q08232	1.11128	0.332766	3	3	0.152224
Glutamine-dependent NAD(+) synthetase	P38795	1.11122	0.184169	35	11	0.15215
Uncharacterized transcriptional regulatory protein YNR063W	P53749	1.11113	0.0453181	3	3	0.152033
Transcription factor SKN7	P38889	1.11046	0.285151	8	6	0.15116
Regulator of rDNA transcription protein 6	P53117	1.11033	0.436371	3	3	0.150984
SED5-binding protein 2	P53953	1.10993	0.0828028	13	8	0.150462
Mitochondrial import inner membrane translocase subunit TIM12	P32830	1.10963	0.350092	3	3	0.150081
Vacuolar protein sorting-associated protein 20	Q04272	1.10957	0.171755	5	5	0.149995
Protein GLC8	P41818	1.10939	0.280471	6	5	0.149772
rRNA biogenesis protein RRP36	Q12481	1.10931	0.169356	8	6	0.149667
ATP synthase subunit alpha, mitochondrial	P07251	1.10929	0.172819	27	7	0.149641
Synaptobrevin homolog YKT6	P36015	1.10896	0.109718	3	3	0.149203
Respiratory supercomplex factor 2, mitochondrial	P40090	1.10882	0.0019591	9	9	0.149019
C-1-tetrahydrofolate synthase, mitochondrial	P09440	1.10865	0.00636104	19	17	0.148802
NADPH-dependent methylglyoxal reductase GRE2	Q12068	1.1082	0.133776	5	4	0.14822
Phosphopantothenoylcysteine decarboxylase subunit VHS3	Q08438	1.10799	0.0272956	10	8	0.147946
37S ribosomal protein S28, mitochondrial	P21771	1.10789	0.205266	9	9	0.147811
U3 small nucleolar RNA-associated protein 13	Q05946	1.10778	0.0234384	7	7	0.147666
Chromosome instability protein 1	P40987	1.10769	0.012008	21	18	0.147548
Alpha-1,3-mannosyltransferase MNN1	P39106	1.10766	0.204354	17	16	0.147512
Protein COS12	P53053	1.10764	0.0441179	6	6	0.147494
Mitochondrial outer membrane protein IML2	P47031	1.10734	0.170928	9	9	0.147092
6-phosphogluconate dehydrogenase, decarboxylating 1	P38720	1.10725	0.365006	18	1	0.146984
HDA1 complex subunit 2	Q06629	1.10677	0.0870522	14	12	0.146352
Putative uncharacterized protein YLR202C	O13531	1.10665	0.445987	1	1	0.146195
Protein MTH1	P35198	1.10652	0.0374209	6	5	0.146032
DNA-directed RNA polymerase I subunit RPA43	P46669	1.10569	0.202699	2	2	0.144944
tRNA (uracil(54)-C(5))-methyltransferase	P33753	1.10554	0.0597174	17	14	0.144756
Golgi apparatus membrane protein TVP38	P36164	1.10524	0.782628	2	2	0.144364
Uncharacterized protein YDR056C	Q12025	1.1052	0.292898	1	1	0.144302
40S ribosomal protein S2	P25443	1.10506	0.0722161	5	5	0.144129
Cell division control protein 42	P19073	1.10506	0.170787	2	2	0.144121
Lysine biosynthesis regulatory protein LYS14	P40971	1.105	0.109869	8	8	0.144047
Serine/threonine-protein kinase SKM1	Q12469	1.10491	0.0712289	18	15	0.143935
ATP-dependent (S)-NAD(P)H-hydrate dehydratase	P36059	1.1046	0.373176	3	3	0.143518
Oxysterol-binding protein homolog 4	P35844	1.10412	0.34555	9	1	0.142897
Mitochondrial import receptor subunit TOM6	P33448	1.10409	0.260137	1	1	0.142852
SNF1 protein kinase subunit beta-3	Q04739	1.10404	0.215936	4	3	0.142793
Chorismate synthase	P28777	1.10393	0.320137	5	3	0.142649
Enolase 2	P00925	1.10387	0.1351	110	9	0.142564
LAS seventeen-binding protein 3	P43603	1.10375	0.394963	3	3	0.142408
Elongator complex protein 2	P42935	1.10372	0.0266608	11	10	0.142369
PHO85 cyclin-2	P25693	1.10347	0.079537	8	8	0.142048
UPF0508 protein YJL181W	P46987	1.10342	0.159453	4	3	0.141982
Pre-rRNA-processing protein ESF2	P53743	1.1034	0.27895	5	5	0.141962
Protein phosphatase 2C homolog 4	P38089	1.10335	0.109299	12	9	0.141893
Tricarboxylate transport protein	P38152	1.10318	0.00265779	4	4	0.141673
Transcription factor SPT20	P50875	1.10307	0.207534	7	3	0.141524
Protein LST7	P53237	1.10295	0.177439	5	3	0.141368
Monopolin complex subunit LRS4	Q04087	1.10289	0.400599	6	6	0.141294
Protein PBDC1 homolog	Q08971	1.10289	0.014241	25	5	0.141291
40S ribosomal protein S4-A	P0CX35	1.10278	0.380392	5	4	0.141145
Serine/threonine-protein phosphatase PP1-1	P20604	1.10245	0.308802	6	5	0.140717
Superkiller protein 3	P17883	1.10242	0.135479	19	17	0.140678
Isoleucine--tRNA ligase, cytoplasmic	P09436	1.10232	0.0091073	31	31	0.140541
AP-3 complex subunit mu	P38153	1.10214	0.168679	6	6	0.14031
Cell cycle serine/threonine-protein kinase CDC5/MSD2	P32562	1.10206	0.156466	11	9	0.140208
Isocitrate dehydrogenase [NAD] subunit 1, mitochondrial	P28834	1.10205	0.412368	2	2	0.140184
tRNA (guanine(10)-N2)-methyltransferase	Q12463	1.10175	0.110227	13	10	0.139803
Telomere elongation protein EST1	P17214	1.10165	0.311517	6	6	0.139664
Single-strand telomeric DNA-binding protein GBP2	P25555	1.10139	0.295167	14	12	0.139326
Peroxisome assembly protein 12	Q04370	1.10099	0.0102733	25	19	0.138806
Transcriptional regulatory protein RXT3	Q07458	1.10096	0.00797011	2	2	0.138762
Ribonucleoprotein 1	P32385	1.10074	0.407062	4	4	0.13848
ADP-ribosylation factor-binding protein GGA2	P38817	1.1007	0.223784	26	4	0.138427
E3 ubiquitin-protein ligase PIB1	Q06651	1.10039	0.269843	2	2	0.138019
SEH-associated protein 4	P38164	1.10022	0.0415567	11	10	0.137788
Protein STU1	P38198	1.10002	0.102061	15	15	0.137536
Sphingolipid long chain base-responsive protein PIL1	P53252	1.10002	0.306991	9	2	0.137524
Exosome complex exonuclease DIS3	Q08162	1.10001	0.0501831	18	14	0.137523
Exopolyphosphatase	P38698	1.09996	0.374079	4	3	0.137455
Nucleoporin NUP100/NSP100	Q02629	1.09995	0.216586	4	4	0.137439
6-phosphogluconolactonase 3	P38858	1.09966	0.40622	7	5	0.137052
Aspartate-semialdehyde dehydrogenase	P13663	1.09961	0.0831717	28	4	0.136995
Putative uncharacterized protein YLR415C, mitochondrial	O13578	1.09941	0.244609	1	1	0.136728
Monothiol glutaredoxin-5, mitochondrial	Q02784	1.0991	0.485652	3	1	0.136325
Probable drug/proton antiporter YHK8	P38776	1.09905	0.105778	1	1	0.136252
Nucleoporin NUP192	P47054	1.09897	0.0118824	13	13	0.13615
Transcriptional activator HAA1	Q12753	1.09884	0.312747	4	4	0.135986
Peroxisomal coenzyme A diphosphatase 1, peroxisomal	Q12524	1.0988	0.339586	7	7	0.135933
Putative lipoate-protein ligase A	P47051	1.09866	0.14212	9	8	0.135744
Mitochondrial protein import protein ZIM17	P42844	1.09838	0.339631	5	5	0.135382
Steryl acetyl hydrolase 1	P53324	1.0982	0.334724	6	6	0.135136
Dolichyl-phosphate-mannose--protein mannosyltransferase 4	P46971	1.09811	0.018351	5	5	0.135017
Acetyl-CoA carboxylase	Q00955	1.09809	0.516386	39	36	0.134994
Protein YRO2	P38079	1.09807	0.00391006	4	4	0.134966
DNA repair protein RAD16	P31244	1.09798	0.28788	4	4	0.134846
Coatomer subunit beta'	P41811	1.09792	0.274861	5	5	0.134778
F-box protein COS111	P38308	1.09765	0.0388223	17	11	0.134418
ADA histone acetyltransferase complex component 2	P25649	1.09761	0.0664266	3	2	0.134359
Aminopeptidase 2, mitochondrial	P32454	1.09759	0.0626498	20	18	0.134336
Presequence translocated-associated motor subunit PAM17, mitochondrial	P36147	1.09738	0.15119	3	3	0.134062
SMY2 homolog 2	Q02875	1.09736	0.476684	6	6	0.134036
Long-chain-fatty-acid--CoA ligase 2	P39518	1.09717	0.253367	4	4	0.133784
Cytochrome B translational activator protein CBS2	P14905	1.09695	0.0592599	7	7	0.133503
26S proteasome regulatory subunit RPN7	Q06103	1.09663	0.209155	4	4	0.133079
Probable serine/threonine-protein kinase KKQ8	P36004	1.09641	0.106236	17	13	0.132783
Cullin-8	P47050	1.09624	0.0516016	20	15	0.13256
Peptide chain release factor 1, mitochondrial	P30775	1.09598	0.117599	9	7	0.13222
Transcriptional regulatory protein LGE1	Q02796	1.09586	0.612578	4	4	0.132066
Late secretory pathway protein AVL9	Q12500	1.09548	0.58137	10	7	0.131566
DNA replication licensing factor MCM3	P24279	1.09519	0.016836	16	13	0.131182
Transposon Ty4-H Gag-Pol polyprotein	P0C2J7	1.09516	0.0661581	30	27	0.131148
Putative uncharacterized protein YLR280C	O13541	1.09512	0.0530406	5	3	0.131088
Nitrogen permease reactivator protein	P22211	1.09511	0.220411	5	5	0.13108
Allantoinase	P32375	1.09506	0.0236175	2	2	0.131008
Putative uncharacterized protein YDR029W	Q12111	1.09495	0.0402711	1	1	0.130861
Obg-like ATPase 1	P38219	1.09493	0.0255106	11	10	0.130837
Reduced viability upon starvation protein 161	P25343	1.09479	0.29785	4	3	0.130651
F-box protein YLR224W	Q05947	1.09479	0.00400566	8	6	0.130648
Autophagy-related protein 17	Q06410	1.09474	0.0701885	3	2	0.130589
Probable glutamine amidotransferase DUG3	P53871	1.09465	0.348455	4	4	0.130466
Protein ASI3	P53983	1.09449	0.108357	17	7	0.130255
Metal resistance protein YCF1	P39109	1.09429	0.0519723	17	16	0.12999
CRAL-TRIO domain-containing protein YKL091C	P33324	1.09416	0.300721	3	3	0.129826
Homocysteine S-methyltransferase 1	Q12525	1.09411	0.257408	3	3	0.129755
Uncharacterized protein YNL208W	P40159	1.09409	0.576935	2	1	0.129736
DNA repair protein KRE29	P40026	1.09392	0.170067	10	7	0.129514
Transcriptional activator/repressor GIS1	Q03833	1.09392	0.579192	3	2	0.129506
Mannitol dehydrogenase DSF1	P0CX08	1.09355	0.121425	7	6	0.129018
DNA polymerase alpha-binding protein	Q01454	1.09344	0.203825	31	10	0.12887
Exportin-1	P30822	1.09341	0.00213254	16	14	0.128839
Peroxiredoxin TSA2	Q04120; P34760	1.09338	0.529511	98	1	0.128794
Arrestin-related trafficking adapter 10	P18634	1.09334	0.1512	6	6	0.128742
Ribonucleases P/MRP protein subunit POP3	P53833	1.0931	0.0892204	3	3	0.128427
54S ribosomal protein L22, mitochondrial	P53881	1.09307	0.188673	11	10	0.12839
Kinesin-like protein KIP1	P28742	1.09286	0.166355	20	19	0.128108
6-phosphogluconolactonase 4	P53315	1.09268	0.398797	2	2	0.127873
DNA replication licensing factor MCM6	P53091	1.09268	0.0620918	23	16	0.12787
Protein transport protein DSL1	P53847	1.09256	0.144587	9	9	0.127707
NET1-associated nuclear protein 1	Q02931	1.09213	0.357754	5	4	0.127145
Protein ZDS1	P50111	1.09205	0.03017	15	11	0.12704
Uncharacterized protein YGR117C	P53270	1.09204	0.359172	5	5	0.127032
Oligomycin resistance ATP-dependent permease YOR1	P53049	1.09194	0.161469	13	13	0.126893
Carboxypeptidase Y	P00729	1.09194	0.375697	13	12	0.126887
1,3-beta-glucanosyltransferase GAS5	Q08193	1.09189	0.109257	4	1	0.126833
AP-1-like transcription factor YAP3	P38749	1.09188	0.1372	4	4	0.126818
DNA polymerase delta catalytic subunit	P15436	1.09179	0.0932713	14	12	0.12669
Lysine--tRNA ligase, mitochondrial	P32048	1.09176	0.0662515	15	15	0.126662
Serine/threonine-protein kinase KIN3	P22209	1.09176	0.405728	5	5	0.126652
Kinesin-like protein KIP3	P53086	1.09172	0.212759	12	12	0.126598
Sister chromatid cohesion protein 1	Q12158	1.09165	0.0970277	5	5	0.126512
Cystathionine gamma-lyase	P31373	1.0914	0.180622	8	2	0.126184
Down-regulator of invasive growth 2	Q03373	1.09122	0.190782	3	2	0.125947
Pantothenate kinase CAB1	Q04430	1.09121	0.0437573	1	1	0.125923
UPF0695 membrane protein YOR390W	Q08913	1.09119	0.318363	2	2	0.125901
Protein-lysine N-methyltransferase EFM5	P53200	1.0909	0.108082	2	2	0.125524
Anaphase-promoting complex subunit 4	Q04601	1.0908	0.147675	6	6	0.125381
Histone demethylase JHD2	P47156	1.09051	0.291384	6	5	0.125005
ISWI one complex protein 2	Q12072	1.09049	0.685819	3	3	0.124982
RNA polymerase-associated protein LEO1	P38439	1.0904	0.338699	7	7	0.124854
DNA repair helicase RAD25	Q00578	1.09032	0.0768023	7	7	0.124753
Putative pyridoxal reductase	Q06494	1.09005	0.0202192	9	6	0.12439
Protein MET17	P06106	1.09003	0.120912	11	10	0.124366
Actin-interacting protein 1	P46680	1.08988	0.367783	9	8	0.124174
Putative Xaa-Pro aminopeptidase FRA1	Q07825	1.08982	0.0712779	10	9	0.12409
Pre-mRNA-splicing factor BUD31	P25337	1.08981	0.278123	4	3	0.124077
Magnesium-activated aldehyde dehydrogenase, cytosolic	P54115	1.08977	0.190198	40	10	0.124027
Putative uncharacterized protein YMR294W-A	A0A023PZL7	1.08961	0.36253	1	1	0.12381
PHO85 cyclin-9	Q12477	1.08946	0.242269	2	2	0.123615
Clathrin heavy chain	P22137	1.08945	0.0279098	19	17	0.123596
Peroxisomal 2,4-dienoyl-CoA reductase SPS19	P32573	1.08935	0.447398	4	4	0.123474
Serine/threonine-protein kinase PKH1	Q03407	1.08933	0.235369	6	6	0.123445
Transposon Ty3-I Gag-Pol polyprotein	Q7LHG5	1.08929	0.0393802	18	16	0.123389
Hydroxymethylglutaryl-CoA synthase	P54839	1.08927	0.18872	7	2	0.123361
5'-3' exoribonuclease 1	P22147	1.08923	0.0482975	30	25	0.123306
Suppressor of disruption of TFIIS	P53078	1.08922	0.103703	10	10	0.1233
Cysteine protease ATG4	P53867	1.08911	0.470852	2	2	0.12315
37S ribosomal protein S35, mitochondrial	P53292	1.08897	0.654305	1	1	0.122959
Spindle pole body component KRE28	Q04431	1.08888	0.196764	14	12	0.122839
Thiamine thiazole synthase	P32318	1.08879	0.556227	4	4	0.122726
Ribosome quality control complex subunit 1	Q05468	1.08877	0.195324	9	8	0.122706
Protein JLP2	P40206	1.08873	0.444946	2	2	0.122649
U2 snRNP component HSH155	P49955	1.08852	0.214177	9	8	0.122366
Protein phosphatase methylesterase 1	P38796	1.0884	0.0417902	3	3	0.122205
54S ribosomal protein L39, mitochondrial	P36533	1.08828	0.608013	2	2	0.12205
Uncharacterized protein YNR040W	P53736	1.08825	0.442291	4	4	0.122004
Putative uncharacterized protein YDR491C	Q03418	1.08807	0.315668	2	2	0.121767
MIOREX complex component 8	P38694	1.08795	0.0729674	13	11	0.12161
U3 small nucleolar RNA-associated protein 4	Q06679	1.08792	0.312274	10	9	0.121572
Mannose-1-phosphate guanyltransferase	P41940	1.08786	0.184926	15	5	0.121487
E3 ubiquitin-protein ligase UBR2	Q07963	1.08783	0.292773	13	13	0.121448
Protein FMP42	Q04991	1.08771	0.0615864	12	7	0.12129
RNA polymerase I-specific transcription initiation factor RRN6	P32786	1.08769	0.147468	14	13	0.121261
Putative uncharacterized protein YLR217W	O13532	1.08767	0.348031	2	1	0.121242
Carrier protein YMC2, mitochondrial	P39966	1.08761	0.419561	5	3	0.121163
Altered inheritance rate of mitochondria protein 29	P36154	1.08749	0.514204	7	1	0.120998
Phospholipid:diacylglycerol acyltransferase	P40345	1.08723	0.213251	12	10	0.120652
Pre-mRNA-processing factor 19	P32523	1.08722	0.499898	3	3	0.120647
Transcription factor PDR8	Q06149	1.0872	0.197223	10	7	0.120619
Mitochondrial metal transporter 2	Q08970	1.08715	0.186027	12	9	0.120546
Pre-tRNA-processing protein PTA1	Q01329	1.08714	0.0295922	11	9	0.120538
Mitochondrial 2-oxodicarboxylate carrier 2	Q99297	1.08707	0.349791	4	3	0.120438
ARF guanine-nucleotide exchange factor 2	P39993	1.08686	0.0726063	10	10	0.120172
Protein GTS1	P40956	1.08645	0.116148	19	13	0.11962
Monoglyceride lipase	P28321	1.08624	0.0190853	2	2	0.119342
Glycerol uptake protein 1	P53154	1.08621	0.0672326	6	5	0.119308
Putative sulfate transporter YPR003C	P53394	1.08595	0.018064	5	4	0.118963
Transgelin	Q08873	1.08592	0.492221	3	3	0.118923
Putative uncharacterized hydrolase YKL033W-A	Q86ZR7	1.08587	0.0314777	5	4	0.118854
Uncharacterized protein YEL023C	P39992	1.08586	0.0911107	15	10	0.11884
ATP synthase subunit e, mitochondrial	P81449	1.08557	0.59632	1	1	0.118449
Probable alanine aminotransferase, mitochondrial	P52893	1.08548	0.0892092	8	7	0.118336
Lipase 2	P54857	1.08543	0.68357	6	5	0.118263
Casein kinase I homolog HRR25	P29295	1.0853	0.21045	6	5	0.118089
ABC1 family protein MCP2	Q06567	1.08529	0.0521715	9	7	0.118078
Protein FAF1	P40546	1.08501	0.0332121	6	6	0.117714
Isopentenyl-diphosphate Delta-isomerase	P15496	1.08495	0.132606	3	2	0.117627
E3 ubiquitin-protein ligase UBR1	P19812	1.08446	0.0148007	25	17	0.116979
Actin-related protein 2/3 complex subunit 2	P53731	1.08426	0.0693473	2	2	0.116708
Paxillin-like protein 1	P36166	1.08421	0.511251	6	5	0.116642
Protein AF-9 homolog	P53930	1.0842	0.57289	3	3	0.116634
Kinesin-like protein KIP2	P28743	1.08406	0.0131451	18	15	0.11644
Regulator of phospholipase D SRF1	Q12516	1.08399	0.455473	8	7	0.116352
Trafficking protein particle complex II-specific subunit 120	Q04183	1.08389	0.320747	19	16	0.116224
Adenylosuccinate lyase	Q05911	1.08362	0.296832	6	6	0.115858
Uncharacterized membrane protein YFL034W	P43564	1.08355	0.195609	14	12	0.115769
Mediator of RNA polymerase II transcription subunit 13	P38931	1.08349	0.273384	10	9	0.115686
Protein KTI12	P34253	1.08347	0.0683479	4	4	0.115655
Protein SLF1	Q12034	1.08342	0.29843	2	2	0.115596
Glycerol kinase	P32190	1.08336	0.0549845	6	6	0.115517
Putative uncharacterized protein YJR071W	P47121	1.08307	0.382472	1	1	0.115127
Mitochondrial carrier protein RIM2	P38127	1.08307	0.236942	8	8	0.115121
Uncharacterized protein YMR196W	Q04336	1.08304	0.0680891	9	6	0.115083
Alpha-mannosidase	P22855	1.08291	0.127602	20	17	0.114914
Peroxisomal membrane protein PEX27	Q08580	1.08291	0.589351	7	7	0.114914
Single-stranded nucleic acid-binding protein	P10080	1.08282	0.434395	37	8	0.114798
Radiation-sensitive protein 28	Q12021	1.08282	0.45858	9	6	0.114789
Glucose-induced degradation protein 7	P25569	1.08268	0.204532	9	8	0.114603
Protein SDA1	P53313	1.08267	0.0413122	11	10	0.114597
Cytochrome b translational activator protein CBS1, mitochondrial	P14066	1.0826	0.319186	5	5	0.114502
PAB-dependent poly(A)-specific ribonuclease subunit PAN2	P53010	1.0822	0.247426	7	7	0.113973
Geranylgeranyl pyrophosphate synthase	Q12051	1.0822	0.32571	3	3	0.113971
mRNA-capping enzyme subunit alpha	Q01159	1.08218	0.429963	7	7	0.113934
Osmolarity two-component system protein SSK1	Q07084	1.08202	0.0875901	7	6	0.113723
Protein arginine N-methyltransferase SFM1	Q12314	1.08201	0.353489	6	6	0.113716
GPI mannosyltransferase 3	P30777	1.08192	0.503446	1	1	0.113594
Protein RIF2	Q06208	1.0818	0.0517633	11	10	0.113428
Golgi to ER traffic protein 4	Q12125	1.08175	0.626508	3	3	0.113368
Siderophore iron transporter ENB1	Q08299	1.08167	0.463044	3	2	0.113254
Protein BRE4	Q07660	1.0815	0.0683294	99	76	0.113037
Putative uncharacterized protein YGR011W	P53205	1.08139	0.271423	2	1	0.112892
Sister chromatid cohesion protein DCC1	P25559	1.08138	0.117842	2	2	0.112875
3-hydroxy-3-methylglutaryl-coenzyme A reductase 2	P12684	1.0812	0.221144	9	7	0.112639
3-isopropylmalate dehydrogenase	P04173	1.08115	0.0531136	2	2	0.112571
Superkiller protein 7	Q08491	1.08109	0.421312	23	6	0.112491
Translation machinery-associated protein 10	Q06177	1.08108	0.348282	2	2	0.112478
Heterogeneous nuclear rnp K-like protein 2	P38199	1.08108	0.0129636	7	7	0.112472
U3 small nucleolar ribonucleoprotein protein IMP3	P32899	1.08087	0.255472	6	6	0.112192
GPI-anchored wall transfer protein 1	P47026	1.08081	0.174515	2	2	0.112107
Mitochondrial GTPase 1	Q03151	1.0807	0.25587	3	2	0.111968
Elongation factor Tu, mitochondrial	P02992	1.08052	0.132249	3	3	0.111729
Transcription initiation factor TFIID subunit 1	P46677	1.08048	0.0886283	15	13	0.111676
Subtilisin-like protease 3	P25036	1.08026	0.344785	7	6	0.111385
V-type proton ATPase subunit c'	P32842	1.08004	0.495627	1	1	0.111083
Cytochrome c oxidase subunit 2	P00410	1.07995	0.362501	4	4	0.110963
Geranylgeranyl transferase type-2 subunit alpha	Q00618	1.07989	0.210823	10	8	0.11089
Glucosidase 2 subunit alpha	P38138	1.07982	0.0788104	12	10	0.110795
Adaptin medium chain homolog APM2	P38700	1.07967	0.176213	8	8	0.110596
Monothiol glutaredoxin-4	P32642; Q03835	1.0796	0.641345	2	1	0.110493
Autophagy-related protein 14	P38270	1.07951	0.438036	7	6	0.11038
Translation initiation factor eIF-2B subunit delta	P12754	1.07941	0.146784	5	5	0.110237
Cell wall mannoprotein HSP150	P32478	1.07933	0.588145	8	4	0.110135
Glutamyl-tRNA(Gln) amidotransferase subunit F, mitochondrial	P53260	1.07933	0.661585	3	3	0.11013
DNA damage-binding protein CMR1	Q12510	1.07924	0.305335	4	4	0.110009
Translation machinery-associated protein 17	Q12513	1.07923	0.442696	4	4	0.109998
Glucoamylase, intracellular sporulation-specific	P08019	1.07922	0.0480544	3	3	0.109989
Uncharacterized protein YMR147W	P40218	1.07919	0.0412822	1	1	0.109948
Uncharacterized protein YER079W	P40052	1.07908	0.467569	3	2	0.109799
Peptide methionine sulfoxide reductase	P40029	1.07869	0.280805	6	1	0.109286
Arginine--tRNA ligase, cytoplasmic	Q05506	1.07867	0.0604899	7	1	0.109254
Nucleoporin NUP1	P20676	1.07845	0.0780983	12	12	0.108953
Dolichyl pyrophosphate Glc1Man9GlcNAc2 alpha-1,3-glucosyltransferase	P40351	1.07818	0.106246	10	9	0.108599
60S ribosomal protein L12-A	P0CX53;P0CX54	1.07814	0.129923	17	1	0.108545
Carnosine N-methyltransferase	P53934	1.07812	0.0486315	8	7	0.108518
Regulatory protein SWI6	P09959	1.07809	0.474213	5	5	0.108483
Heat shock protein homolog SSE1	P32589	1.07802	0.0442312	69	16	0.10839
Manganese-transporting ATPase 1	P39986	1.07793	0.134451	14	14	0.108268
Bud site selection protein 14	P27637	1.07783	0.271739	6	6	0.108124
Multisite-specific tRNA:(cytosine-C(5))-methyltransferase	P38205	1.07776	0.0696337	8	7	0.108041
Uncharacterized protein YML020W	Q03722	1.07733	0.261135	11	10	0.10746
Uncharacterized protein YBR096W	P38256	1.07683	0.727081	3	3	0.106795
Calpain-like protease 1	Q03792	1.07683	0.616669	6	6	0.106795
Elongation factor G, mitochondrial	P25039	1.07657	0.225358	17	13	0.106439
Minichromosome maintenance protein 5	P29496	1.07634	0.187866	7	7	0.106136
Ubiquitin carboxyl-terminal hydrolase 13	P38187	1.07626	0.125589	6	6	0.106033
Replication factor C subunit 5	P38251	1.07609	0.416475	9	8	0.105793
Serine/threonine-protein kinase PKH2	Q12236	1.07572	0.194854	15	14	0.105309
Tropomyosin-1	P17536	1.0757	0.374599	13	7	0.105272
NAD(P)H-hydrate epimerase	P40165	1.07569	0.18438	3	3	0.105267
Anaphase-promoting complex subunit CDC23	P16522	1.07537	0.135055	12	11	0.104838
Putative uncharacterized membrane protein YIR036W-A	A0A023PYI5	1.07533	0.233773	2	2	0.104783
Uncharacterized protein YHR035W	P38769	1.07505	0.0223068	13	12	0.104404
37S ribosomal protein YMR-31, mitochondrial	P19955	1.07502	0.125641	6	5	0.104359
Putative cystathionine gamma-synthase YLL058W	Q12198	1.07487	0.0075574	17	17	0.104167
PHO85 cyclin-6	P40038	1.07472	0.361422	7	6	0.103966
Class E vacuolar protein-sorting machinery protein HSE1	P38753	1.07467	0.018451	11	10	0.103898
CCR4-associated factor 16	P36016	1.0746	0.122907	29	23	0.103801
Upstream activation factor subunit UAF30	Q08747	1.07458	0.149685	8	7	0.103769
Uncharacterized oxidoreductase YDL114W	Q07530	1.07455	0.522363	2	2	0.103727
DNA-binding protein RAP1	P11938	1.07451	0.560635	3	3	0.103672
Factor arrest protein 10	Q06001	1.07443	0.202023	3	3	0.103577
Probable ATP-dependent permease	P25371	1.0744	0.21584	15	11	0.103525
GTPase-activating protein BEM3	P32873	1.07425	0.121841	8	8	0.103329
Protein ESC2	Q06340	1.07409	0.111442	15	9	0.10312
Protein BMH1	P29311	1.07404	0.300999	137	3	0.10305
5-formyltetrahydrofolate cyclo-ligase	P40099	1.07397	0.502894	1	1	0.102954
Putative aryl-alcohol dehydrogenase AAD10	P47182	1.07396	0.201988	18	16	0.102939
54S ribosomal protein L2, mitochondrial	P12687	1.07395	0.157024	18	14	0.102927
Fumarate reductase 2	P21375	1.0737	0.126862	3	3	0.102597
ATP-dependent RNA helicase DBP10	Q12389	1.0737	0.0585616	18	17	0.102588
Copper transport protein CTR1	P49573	1.07361	0.544421	6	2	0.10247
Alcohol O-acetyltransferase 1	P40353	1.07358	0.127395	14	12	0.102434
Mitochondrial import inner membrane translocase subunit TIM16	P42949	1.07347	0.376047	5	5	0.102277
tRNA N6-adenosine threonylcarbamoyltransferase, mitochondrial	P43122	1.0734	0.377251	4	4	0.102189
UPF0592 protein YDL073W	Q07454	1.0733	0.28894	26	16	0.102049
ATP-dependent RNA helicase DBP5	P20449	1.07309	0.269127	8	7	0.101771
Protein SSH4	P32343	1.07294	0.223037	6	5	0.101566
Probable alpha-1,3-mannosyltransferase MNT4	P53745	1.07262	0.14593	17	10	0.101139
Sphingoid long chain base kinase 4	Q12246	1.07255	0.052157	11	10	0.101047
Probable pyridoxal 5'-phosphate synthase subunit SNZ3	P43545	1.07242	0.064915	27	24	0.100876
40S ribosomal protein S26-A	P39938	1.07233	0.288336	9	1	0.100748
Uncharacterized protein YBR225W	P38321	1.07232	0.320742	6	5	0.100737
RING-finger protein MAG2	Q06436	1.07213	0.472082	12	6	0.100482
Altered inheritance of mitochondria protein 19, mitochondrial	P40502	1.072	0.817758	2	1	0.100301
Low-affinity phosphate transporter PHO90	P39535	1.07198	0.222386	8	8	0.10028
Vacuolar fusion protein MON1	P53129	1.07153	0.568069	1	1	0.0996709
Tubulin-specific chaperone A	P48606	1.07141	0.0677787	6	5	0.0995112
Phosphate metabolism protein 7	Q12252	1.07117	0.4312	3	3	0.0991922
Centromere DNA-binding protein complex CBF3 subunit B	P40969	1.07106	0.0705013	7	7	0.0990369
Protein SLM6	P38343	1.071	0.667914	2	2	0.0989544
NADPH-dependent alpha-keto amide reductase	Q07551	1.07082	0.298114	3	3	0.0987189
Serine/threonine-protein kinase RIM15	P43565	1.07075	0.0827096	11	11	0.0986278
Sporulation-specific protein 75	Q07798	1.0707	0.000142697	18	15	0.0985481
Vitamin B6 transporter TPN1	P53099	1.07067	0.156491	4	4	0.0985098
Putative uncharacterized protein YKR012C	P36109	1.07042	0.0613115	2	2	0.0981745
Serine/threonine-protein kinase GIN4	Q12263	1.07032	0.0725542	14	14	0.0980448
Transcriptional activator protein UGA3	P26370	1.07031	0.160335	4	4	0.0980225
Large subunit GTPase 1	P53145	1.07028	0.17219	21	20	0.0979904
Heat shock protein 60, mitochondrial	P19882	1.07027	0.13676	77	17	0.097979
Putative uncharacterized protein YAL004W	P39703	1.0701	0.40727	3	2	0.0977459
Importin beta-like protein KAP120	Q02932	1.07008	0.152227	71	58	0.0977156
ATP-dependent RNA helicase HAS1	Q03532	1.07002	0.0199738	13	13	0.0976416
Protein phosphatase PP2A regulatory subunit B	Q00362	1.07001	0.102591	8	7	0.0976179
26S proteasome regulatory subunit RPN12	P32496	1.06997	0.20138	10	8	0.0975663
Kinetochore-associated protein MTW1	P39731	1.06997	0.370658	6	6	0.0975662
Iron transport multicopper oxidase FET5	P43561	1.06987	0.309304	6	5	0.0974322
Pre-mRNA-splicing factor ATP-dependent RNA helicase PRP16	P15938	1.06968	0.215457	23	21	0.0971772
Protein SPP41	P38904	1.06968	0.265307	14	12	0.0971763
ATP-dependent RNA helicase DRS1	P32892	1.06967	0.272659	34	13	0.0971643
Tubulin beta chain	P02557	1.06952	0.571359	1	1	0.0969647
Protein MSS2, mitochondrial	P40990	1.06949	0.186534	8	7	0.0969214
Protein SCM4	P32564	1.06947	0.30355	4	2	0.0968947
Calcium-channel protein CCH1	P50077	1.0689	0.179753	33	27	0.0961312
Zinc-regulated transporter 1	P32804	1.06881	0.276898	2	2	0.0960023
RNA polymerase II transcription factor B subunit 3	Q03290	1.06866	0.189055	5	4	0.0958076
Protein transport protein SEC39	Q12745	1.06847	0.0485873	4	4	0.0955403
Serine/threonine-protein kinase RIM11/MSD1	P38615	1.06843	0.0369752	5	5	0.0954925
Uncharacterized protein YJL132W	P47014	1.06834	0.447784	4	4	0.0953649
Mitochondrial acidic protein MAM33	P40513	1.06825	0.389261	2	2	0.0952465
Transcription initiation factor IIE subunit alpha	P36100	1.06824	0.0614039	5	4	0.0952309
Protein SFI1	Q12369	1.06822	0.159591	26	21	0.0952028
Conserved oligomeric Golgi complex subunit 8	Q04632	1.06818	0.445774	33	31	0.0951496
Asparagine synthetase [glutamine-hydrolyzing] 1	P49089	1.06811	0.109367	27	18	0.09506
60S ribosomal protein L39	P04650	1.06811	0.816003	1	1	0.095059
Glycine dehydrogenase (decarboxylating), mitochondrial	P49095	1.06811	0.109415	14	13	0.0950562
54S ribosomal protein IMG2, mitochondrial	P25642	1.06804	0.405584	6	5	0.0949669
Nucleoporin NUP157	P40064	1.06801	0.133087	16	15	0.0949226
Uncharacterized ATP-dependent helicase IRC20	Q06554	1.06799	0.000191502	16	13	0.0949038
Prephenate dehydrogenase [NADP(+)]	P20049	1.06785	0.479827	3	3	0.0947119
Checkpoint protein RAD24	P32641	1.06772	0.328296	2	2	0.0945347
ATP-dependent RNA helicase DHH1	P39517	1.06767	0.287193	5	5	0.0944709
ATP-dependent permease AUS1	Q08409	1.06736	0.0659667	8	6	0.0940423
Arsenical-resistance protein 2	Q06597	1.0672	0.0274116	4	4	0.0938278
Uncharacterized protein YIL163C	P40448	1.06708	0.240359	17	15	0.0936674
Bud site selection protein 22	Q04347	1.06708	0.112476	7	7	0.0936651
Transcriptional regulator URE2	P23202	1.06695	0.000238491	13	9	0.0934897
Transcription initiation factor TFIID subunit 2	P23255	1.06673	0.0513933	24	20	0.093199
Putative uncharacterized protein YLR198C	O13530	1.06664	0.709506	1	1	0.0930711
Pre-rRNA-processing protein ESF1	Q06344	1.06654	0.446087	6	6	0.0929362
Protein AHC1	Q12433	1.0665	0.246028	7	7	0.0928836
Glucosamine 6-phosphate N-acetyltransferase	P43577	1.0665	0.544964	1	1	0.092882
Probable guanine deaminase	Q07729	1.06634	0.117333	7	5	0.0926727
Aspartate--tRNA ligase, cytoplasmic	P04802	1.06617	0.172807	11	2	0.092435
LETM1 domain-containing protein YLH47, mitochondrial	Q06493	1.06594	0.13209	20	14	0.0921276
ATP-dependent RNA helicase DBP1	P24784	1.06578	0.178088	7	7	0.0919149
Protein SCO1, mitochondrial	P23833	1.06563	0.0106813	7	7	0.0917041
Cell division control protein 48	P25694	1.0656	0.129106	34	6	0.09167
UBX domain-containing protein 2	Q04228	1.06559	0.0654821	8	5	0.0916567
Outer spore wall protein 6	P47056	1.06555	0.617789	5	4	0.0915929
Pre-mRNA-splicing factor URN1	Q06525	1.06553	0.0483025	10	7	0.0915728
Protein MRG3-like	P36066	1.06544	0.187765	8	7	0.0914515
Phosphatidylinositol 3-kinase VPS34	P22543	1.06538	0.409512	2	2	0.0913731
Protein NSG1	P38837	1.06535	0.0964593	5	4	0.0913217
Replication factor A protein 2	P26754	1.06528	0.0116283	9	1	0.0912275
25S rRNA (cytosine(2870)-C(5))-methyltransferase	P40991	1.06504	0.0341915	18	14	0.0909014
Protein ASI2	P53895	1.06496	0.51637	2	2	0.090798
Beta-glucan synthesis-associated protein SKN1	P33336	1.06488	0.656574	2	2	0.0906904
Splicing factor MUD2	P36084	1.06488	0.032441	17	15	0.0906841
Anaphase-promoting complex subunit 9	Q12107	1.06482	0.235605	3	3	0.090613
Protein PES4	P39684	1.06469	0.0514884	16	5	0.0904276
Sigma-like sequence protein 1, mitochondrial	P42900	1.06466	0.207429	5	5	0.0903873
Cytochrome c1 heme lyase	Q00873	1.0646	0.252625	5	4	0.0903145
Fatty acid synthase subunit alpha	P19097	1.0642	0.0152729	41	2	0.089772
1-(5-phosphoribosyl)-5-[(5-phosphoribosylamino)methylideneamino] imidazole-4-carboxamide isomerase	P40545	1.06414	0.0235628	11	7	0.0896844
Serine/threonine-protein kinase BCK1/SLK1/SSP31	Q01389	1.06404	0.21094	14	14	0.089548
Oxysterol-binding protein homolog 3	P38713	1.06381	0.206209	19	15	0.0892432
Putative UPF0320 protein YMR326C	Q6B0R7	1.06372	0.187727	1	1	0.0891185
Temperature shock-inducible protein 1	P27654	1.06368	0.672321	1	1	0.0890644
Endoplasmic reticulum membrane protein 65	P40085	1.06362	0.718215	6	4	0.0889802
Low-affinity glucose transporter HXT1	P32465	1.06351	0.459787	3	3	0.088833
NAD-dependent histone deacetylase SIR2	P06700	1.06342	0.392341	6	5	0.0887134
Helicase SWR1	Q05471	1.06337	0.501393	10	9	0.0886399
F-box protein MET30	P39014	1.06329	0.0671001	4	4	0.0885382
Altered inheritance of mitochondria protein 3	P38266	1.06321	0.3105	6	6	0.0884204
Mitochondrial RNA-splicing protein MRS1	P07266	1.06313	0.583752	5	5	0.0883188
Phosphatidate phosphatase APP1	P53933	1.06303	0.184515	8	8	0.0881796
Nucleolar protein 6	Q07623	1.06295	0.639252	10	3	0.0880705
Polynucleotide 3'-phosphatase	Q03796	1.06269	0.115284	6	6	0.0877142
Uroporphyrinogen decarboxylase	P32347	1.06249	0.321922	6	6	0.0874448
Uncharacterized mitochondrial outer membrane protein YDR381C-A	Q3E6R5	1.06243	0.326794	3	3	0.0873692
Glutamate--tRNA ligase, mitochondrial	P48525	1.06239	0.201337	6	6	0.087313
KH domain-containing protein YLL032C	Q07834	1.06235	0.138185	3	3	0.087254
Protein SEY1	Q99287	1.06233	0.00526763	16	15	0.0872283
Iron-sulfur clusters transporter ATM1, mitochondrial	P40416	1.06205	0.0518609	18	11	0.0868583
Proliferating cell nuclear antigen	P15873	1.06154	0.228155	1	1	0.0861552
26S protease regulatory subunit 6B homolog	P33298	1.06149	0.570554	6	6	0.0860892
Uncharacterized transcriptional regulatory protein YLR278C	Q05854	1.06144	0.142367	6	6	0.0860172
60S ribosomal protein L1-A	P0CX43;P0CX44	1.06143	0.341027	3	1	0.086006
Probable serine/threonine-protein kinase IKS1	P47042	1.06126	0.104542	7	7	0.0857741
SCF E3 ubiquitin ligase complex F-box protein GRR1	P24814	1.06125	0.582165	8	7	0.0857579
Cofilin	Q03048	1.06114	0.211714	85	8	0.0856151
Maintenance of telomere capping protein 5	Q03897	1.06095	0.434737	20	17	0.0853512
Protein SOK1	P40317	1.06086	0.00829546	4	3	0.0852398
Protein AFG1	P32317	1.06077	0.0421949	8	8	0.085114
ATPase synthesis protein 25, mitochondrial	Q03153	1.06063	0.115974	9	7	0.0849177
Transcriptional regulator CRZ1	P53968	1.06062	0.287838	7	7	0.0849124
Condensin complex subunit 1	Q06156	1.06058	0.403937	28	15	0.0848577
Ribosome maturation protein SDO1	Q07953	1.06058	0.576917	6	6	0.0848567
Histone H2A.2	P04912; P04911	1.06022	0.509803	1	1	0.0843697
Uncharacterized protein YHR213W-A	Q8TGT4	1.06016	0.43704	1	1	0.0842811
Helicase SEN1	Q00416	1.06013	0.104453	22	19	0.0842398
Nucleolar protein 56	Q12460	1.06012	0.455035	7	1	0.0842343
DNA polymerase gamma	P15801	1.06	0.327172	14	12	0.0840623
Actin-regulating kinase 1	P53974	1.05999	0.132821	3	3	0.084054
U3 small nucleolar RNA-associated protein 10	P42945	1.05952	0.0213299	98	78	0.0834094
Putative uncharacterized protein YOR186W	Q08560	1.05937	0.427928	1	1	0.0831998
Putative uncharacterized protein YAL056C-A	O13513	1.05927	0.837314	1	1	0.0830662
CAAX prenyl protease 1	P47154	1.05915	0.535684	5	4	0.0829057
Alcohol dehydrogenase 2	P00331; P00330	1.05905	0.432798	13	4	0.0827692
Transcriptional protein SWT1	Q12104	1.05904	0.716897	2	2	0.0827534
Chromatin structure-remodeling complex subunit RSC1	P53236	1.0589	0.504542	9	8	0.0825685
Peptidyl-tRNA hydrolase 2	P34222	1.05869	0.650378	1	1	0.0822782
Bifunctional purine biosynthetic protein ADE5,7	P07244	1.05858	0.0111036	6	6	0.0821336
Uncharacterized membrane protein YML131W	Q03102	1.05857	0.134192	4	4	0.0821197
Shuttling pre-60S factor ECM1	P39715	1.05849	0.0418863	1	1	0.0820011
U4/U6 small nuclear ribonucleoprotein PRP4	P20053	1.05847	0.428245	6	5	0.0819781
YAP1-binding protein 1	P38315	1.05817	0.019691	17	17	0.0815736
Nucleolar pre-ribosomal-associated protein 1	P34241	1.05804	0.0124328	17	15	0.0813938
Ribosome biogenesis protein SSF1	P38789	1.05787	0.132197	14	12	0.0811621
Histone acetyltransferase type B catalytic subunit	Q12341	1.05774	0.0240684	10	9	0.0809831
Methylenetetrahydrofolate dehydrogenase [NAD(+)]	Q02046	1.05756	0.212646	13	12	0.0807453
Phosphatidylinositol 4-kinase PIK1	P39104	1.0575	0.442925	9	9	0.0806509
NADH kinase POS5, mitochondrial	Q06892	1.05745	0.118316	4	4	0.0805851
Glutathione S-transferase omega-like 3	Q04806	1.05739	0.562712	4	4	0.0805089
Probable E3 ubiquitin-protein ligase HUL4	P40985	1.05733	0.0430619	13	13	0.0804305
Putative uncharacterized membrane protein YHL002C-A	A0A023PYG1	1.0572	0.334159	2	1	0.0802551
Outer spore wall protein 2	Q12202	1.05716	0.458832	5	5	0.0802003
Non-histone chromosomal protein 6A	P11632	1.05709	0.284822	12	3	0.0800984
Putative uncharacterized protein YGL052W	P53175	1.05702	0.529028	5	4	0.0800071
ADP-ribosylation factor GTPase-activating protein GCS1	P35197	1.05702	0.175522	3	3	0.0800035
Ribosome assembly protein 1	P53893	1.05684	0.02238	13	11	0.0797591
Uncharacterized protein YPL277C	Q08989	1.05662	0.583648	3	3	0.0794559
Hsp70 nucleotide exchange factor FES1	P38260	1.05658	0.469245	8	2	0.0794055
Structure-specific endonuclease subunit SLX4	Q12098	1.0565	0.115122	8	5	0.0792981
Galactose transporter	P13181	1.05628	0.183691	10	9	0.0789905
Putative uncharacterized protein YGR293C	P53342	1.05622	0.2498	1	1	0.0789163
Tyrosine-protein phosphatase 1	P25044	1.05621	0.522788	3	3	0.0788926
Centractin	P38696	1.05615	0.234208	2	2	0.0788203
Rotenone-insensitive NADH-ubiquinone oxidoreductase, mitochondrial	P32340	1.05597	0.317869	6	4	0.0785711
E3 ubiquitin-protein ligase SNT2	P53127	1.05589	0.0211004	22	22	0.0784564
Anaphase spindle elongation protein	P50275	1.05587	0.248125	25	17	0.0784254
Isocitrate dehydrogenase [NAD] subunit 2, mitochondrial	P28241	1.05578	0.250628	4	4	0.0783093
Nicotinamidase	P53184	1.05568	0.0680486	19	5	0.0781676
Protein YIP5	P53108	1.05567	0.51531	2	2	0.0781534
37S ribosomal protein MRP17, mitochondrial	P28778	1.05562	0.225232	3	3	0.0780863
Transcription initiation factor IIB	P29055	1.05557	0.501099	10	7	0.0780209
Membrane-anchored lipid-binding protein LAM4	P38800	1.05554	0.067026	29	27	0.0779799
NAD(P)H-dependent FMN reductase LOT6	Q07923	1.05553	0.662839	2	2	0.0779655
Uncharacterized protein YKL050C	P35736	1.05524	0.222812	14	14	0.0775751
GTPase-activating protein GYP3	P48566	1.05501	0.167474	2	2	0.077257
Fimbrin	P32599	1.05479	0.134951	19	3	0.0769516
Uncharacterized protein YMR206W	Q03695	1.05472	0.0427552	4	4	0.076861
Putative DNA helicase INO80	P53115	1.05472	0.353401	14	14	0.0768605
Inactive diphosphatase DCS2	Q12123	1.0547	0.639145	3	3	0.0768333
Inorganic pyrophosphatase	P00817	1.05451	0.0209503	21	6	0.0765665
Frataxin homolog, mitochondrial	Q07540	1.05437	0.413904	2	2	0.0763873
DNA repair protein RAD57	P25301	1.05428	0.128221	4	4	0.0762576
54S ribosomal protein L49, mitochondrial	P40858	1.05424	0.658169	1	1	0.0762083
Dihydrolipoyllysine-residue succinyltransferase component of 2-oxoglutarate dehydrogenase complex, mitochondrial	P19262	1.05418	0.717027	6	5	0.0761207
Acetyl-coenzyme A synthetase 1	Q01574	1.05417	0.374846	5	5	0.0761051
Uncharacterized protein YOR316C-A	Q3E806	1.05408	0.406164	1	1	0.0759858
Putative uncharacterized protein YHL005C	P38752	1.05376	0.606351	2	2	0.0755508
COP9 signalosome complex subunit 10	Q12348	1.05349	0.600509	14	12	0.0751799
Sporulation-specific protein 22	P40511	1.05346	0.461077	10	9	0.07514
Elongation of fatty acids protein 3	P40319	1.05345	0.583722	2	2	0.0751194
Saccharopine dehydrogenase [NAD(+), L-lysine-forming]	P38998	1.05344	0.190985	3	3	0.0751018
Conserved oligomeric Golgi complex subunit 5	P53951	1.05342	0.302578	3	3	0.0750866
Copper transport protein CTR3	Q06686	1.05339	0.339252	4	2	0.0750445
Protoporphyrin uptake protein 1	P40100	1.05332	0.522407	4	3	0.0749411
Protein HRI1	Q05905	1.05306	0.183149	25	16	0.0745843
Acyl-coenzyme A oxidase	P13711	1.05303	0.261956	11	8	0.0745528
Telomere length regulator protein RIF1	P29539	1.05299	0.256894	14	13	0.074486
Genetic interactor of prohibitin 5, mitochondrial	Q12393	1.05297	0.0939115	7	7	0.074466
Nitrogen network kinase 1	P36003	1.05275	0.079457	17	16	0.0741697
Alpha-1,2 mannosyltransferase KTR1	P27810	1.05263	0.581991	10	10	0.0740001
Thiamine transporter THI72	Q08579	1.05247	0.411506	9	8	0.0737784
Polyphosphatidylinositol phosphatase INP53	Q12271	1.05245	0.146672	15	11	0.0737496
Uncharacterized transporter YLR152C	P54072	1.05219	0.709853	3	3	0.0733933
U3 small nucleolar RNA-associated protein 20	P35194	1.0519	0.10121	36	29	0.0729941
Uncharacterized protein YKL063C	P35725	1.05185	0.500177	4	4	0.0729272
37S ribosomal protein MRP13, mitochondrial	P12686	1.05174	0.287299	5	5	0.0727822
Protein STB2	P46679	1.05174	0.0713244	13	10	0.0727809
26S proteasome regulatory subunit RPN8	Q08723	1.0517	0.484799	12	7	0.0727224
Fructose-1,6-bisphosphatase	P09201	1.05167	0.14263	5	5	0.0726757
Translation machinery-associated protein 46	Q12000	1.0516	0.280304	5	5	0.0725837
Peroxisomal membrane protein import receptor PEX19	Q07418	1.05137	0.0874901	8	3	0.0722738
Putative uncharacterized protein YHL006W-A	A0A023PXE5	1.05133	0.582794	1	1	0.0722128
Nonsense-mediated mRNA decay protein 2	P38798	1.05111	0.138301	16	16	0.0719178
Central kinetochore subunit NKP2	Q06162	1.05108	0.379937	1	1	0.0718699
E3 ubiquitin-protein ligase HEL2	Q05580	1.05096	0.0979944	24	23	0.0717129
M-phase inducer phosphatase	P23748	1.05088	0.331298	8	8	0.0715976
Uncharacterized transporter YJL193W	P39542	1.0508	0.553342	3	3	0.0714885
Uncharacterized protein YNL195C	P40168	1.05071	0.546947	2	2	0.0713684
DNA repair protein RAD4	P14736	1.05067	0.365759	12	11	0.071309
Uncharacterized protein YHR097C	P38809	1.05056	0.247056	18	18	0.0711552
Nucleoporin NUP188	P52593	1.05029	0.0529248	9	9	0.0707852
Bud site selection protein 6	P41697	1.05024	0.395122	7	5	0.0707225
Chromatin structure-remodeling complex protein RSC8	P43609	1.05	0.291731	9	8	0.0703825
Cop9 signalosome complex subunit 11	P40512	1.04999	0.400816	4	4	0.0703724
rRNA 2'-O-methyltransferase fibrillarin	P15646	1.04998	0.594804	7	6	0.0703685
Probable proteasome subunit alpha type-7	P21242	1.04997	0.407798	4	4	0.0703504
Probable ATP-dependent RNA helicase DHR2	P36009	1.04986	0.223815	5	5	0.0701978
RHO GTPase-activating protein RGD1	P38339	1.04973	0.575832	7	7	0.070023
Uncharacterized protein YJL133C-A	Q3E7A3	1.04963	0.405845	3	2	0.0698769
54S ribosomal protein L9, mitochondrial	P31334	1.04961	0.49992	4	4	0.0698549
Intron-encoded DNA endonuclease aI4	P03878	1.04951	0.0443465	7	6	0.0697219
SWI/SNF complex subunit SWI3	P32591	1.04947	0.338585	5	5	0.0696643
DDK kinase regulatory subunit DBF4	P32325	1.04938	0.0440922	13	12	0.0695383
Mannan endo-1,6-alpha-mannosidase DFG5	Q05031	1.04931	0.404045	7	5	0.069446
Protein YNG1	Q08465	1.04919	0.502812	1	1	0.0692719
Cell division control protein 13	P32797	1.04919	0.315262	14	11	0.069271
RNA polymerase II transcription factor B subunit 1	P32776	1.04917	0.164782	17	10	0.0692461
Ran GTPase-activating protein 1	P11745	1.04912	0.115577	8	7	0.0691754
Uncharacterized membrane protein YNL320W	P42840	1.04869	0.63194	2	2	0.0685918
Activator of C kinase protein 1	Q07622	1.04869	0.130853	26	23	0.0685824
Putative uncharacterized protein YNL285W	P53831	1.04862	0.466768	1	1	0.0684941
SWR1-complex protein 7	Q06707	1.04845	0.30241	3	3	0.0682519
Vacuolar import and degradation protein 30	P53076	1.04842	0.201466	12	8	0.0682205
Golgi apyrase	P40009	1.04836	0.555884	8	7	0.0681341
Aldehyde dehydrogenase [NAD(P)+] 2	P54114	1.04816	0.556104	6	5	0.0678624
Transcriptional regulatory protein RXT2	P38255	1.04811	0.20637	3	3	0.0677874
Spindle assembly checkpoint component MAD3	P47074	1.04795	0.454054	49	33	0.0675736
Chromatin structure-remodeling complex protein RSC3	Q06639	1.04789	0.207452	3	3	0.0674849
Uncharacterized protein YNL134C	P53912	1.04764	0.698419	39	34	0.067149
DNA repair helicase RAD3	P06839	1.04761	0.264557	20	17	0.0671041
Eukaryotic translation initiation factor 3 subunit I	P40217	1.04761	0.153095	7	5	0.0671012
Zinc-regulated protein 8	P40021	1.04756	0.198864	10	7	0.0670302
Sensitive to high expression protein 9, mitochondrial	Q04172	1.04744	0.0951969	9	9	0.0668613
Protein BCH2	P36122	1.04729	0.4518	9	8	0.0666555
Intron-encoded DNA endonuclease aI5 alpha	Q9ZZX1	1.04724	0.536381	1	1	0.0665929
COMPASS component BRE2	P43132	1.04723	0.0713849	13	9	0.0665832
37S ribosomal protein MRP2, mitochondrial	P10663	1.04714	0.118239	9	8	0.0664537
Mitochondrial translation optimization protein 1	P53070	1.04714	0.597954	4	4	0.0664488
Translation initiation factor RLI1	Q03195	1.04699	0.194428	13	11	0.0662461
Elongator complex protein 6	Q04868	1.04683	0.282306	4	3	0.0660218
Transcription factor SPN1	Q06505	1.0468	0.399037	9	8	0.0659913
Protein BIR1	P47134	1.04671	0.263024	15	13	0.0658663
UPF0651 protein YPL107W, mitochondrial	Q02873	1.0466	0.493752	13	10	0.065714
Nuclear migration protein JNM1	P36224	1.04658	0.305165	8	8	0.0656851
Mitochondrial ATPase complex subunit ATP10	P18496	1.04656	0.292747	4	4	0.0656551
Pleiotropic ABC efflux transporter of multiple drugs	P33302	1.04649	0.00511041	10	10	0.0655541
Homocysteine S-methyltransferase 2	Q08985	1.04633	0.775226	5	5	0.0653367
37S ribosomal protein MRP1, mitochondrial	P10662	1.04616	0.0793539	8	8	0.0650975
Phosphoserine phosphatase	P42941	1.04597	0.367054	2	2	0.0648476
Transposon Ty1-DR3 Gag-Pol polyprotein	Q99231	1.04588	0.0977183	47	42	0.0647119
Histone acetyltransferase type B subunit 2	P39984	1.04566	0.777887	3	2	0.064407
Pyridoxal 5'-phosphate synthase subunit SNO1	Q03144	1.04561	0.522023	2	2	0.0643426
Vacuolar import and degradation protein 27	P40157	1.04548	0.409112	11	11	0.0641677
E3 ubiquitin-protein ligase complex SLX5-SLX8 subunit SLX8	P40072	1.04534	0.0313222	3	3	0.0639777
Meiosis-specific protein ISC10	P32645	1.04516	0.574479	4	4	0.0637287
Vacuole morphology and inheritance protein 14	Q06708	1.04487	0.282267	8	8	0.0633287
tRNA modification GTPase MSS1, mitochondrial	P32559	1.04477	0.510843	3	3	0.063179
MAP kinase kinase kinase SSK2	P53599	1.04474	0.393814	25	18	0.0631443
Protein SPA2	P23201	1.04463	0.436941	20	16	0.0629943
Vacuolar protein sorting-associated protein 72	Q03388	1.04454	0.165672	5	5	0.0628703
Dihydrofolate synthetase	Q12676	1.0445	0.744966	4	4	0.0628143
Cell morphogenesis protein PAG1	P40468	1.04449	0.160279	29	21	0.0628011
60S ribosomal protein L28	P02406	1.04432	0.115764	7	7	0.062563
Eukaryotic translation initiation factor 2 subunit gamma	P32481	1.04418	0.352468	14	1	0.0623679
Phosphoinositide phosphatase SAC1	P32368	1.04407	0.451835	17	14	0.0622248
Uncharacterized protein YGL176C	P46945	1.04397	0.809421	2	2	0.0620861
Serine/threonine-protein kinase KIN2	P13186	1.04386	0.460071	10	8	0.0619327
Cytosolic Fe-S cluster assembly factor NBP35	P52920	1.04382	0.719043	2	2	0.0618759
Malate dehydrogenase, peroxisomal	P32419	1.04382	0.591662	1	1	0.061867
1,4-alpha-glucan-branching enzyme	P32775	1.04376	0.119133	16	14	0.0617877
Proteasome subunit alpha type-4	P40303	1.04362	0.300224	8	5	0.0615996
Pyruvate decarboxylase isozyme 1	P06169; P26263	1.04362	0.321767	165	1	0.0615911
60S ribosomal protein L4-A	P10664	1.04348	0.639589	4	4	0.0614088
N-acyl-phosphatidylethanolamine-hydrolyzing phospholipase D, mitochondrial	Q02883	1.0434	0.376653	10	9	0.061296
Probable aminopeptidase YDR415C	Q04033	1.04319	0.442098	1	1	0.0609964
tRNA (guanine-N(7)-)-methyltransferase	Q12009	1.04312	0.345785	3	2	0.060902
Autophagy-related protein 9	Q12142	1.04285	0.468964	20	14	0.0605316
Kynureninase	Q05979	1.04281	0.633414	4	4	0.0604705
Uncharacterized protein SLP1	Q12232	1.04274	0.542217	10	10	0.0603801
Vacuolar protein sorting-associated protein 5	Q92331	1.0427	0.0538762	6	6	0.0603293
Transcriptional regulatory protein RCO1	Q04779	1.0427	0.209686	12	10	0.0603289
Endoplasmic oxidoreductin-1	Q03103	1.04257	0.267288	5	5	0.0601511
Protein HIM1	Q06674	1.04255	0.554451	7	6	0.0601199
Halotolerance protein 9	Q12180	1.04251	0.333114	13	10	0.0600571
Vacuolar protein sorting-associated protein 64	Q03944	1.04243	0.672961	12	12	0.0599568
Uncharacterized protein YPR145C-A	P0CE69	1.04237	0.664518	4	4	0.0598688
T-complex protein 1 subunit theta	P47079	1.04228	0.781905	8	8	0.0597404
Dihydrolipoyllysine-residue acetyltransferase component of pyruvate dehydrogenase complex, mitochondrial	P12695	1.04228	0.62673	35	4	0.05974
Mitochondrial Rho GTPase 1	P39722	1.04215	0.716007	4	4	0.0595578
RNA exonuclease 3	Q12090	1.04194	0.492961	7	6	0.0592776
1-phosphatidylinositol 3-phosphate 5-kinase FAB1	P34756	1.04168	0.334257	22	21	0.0589053
Zinc finger protein RTS2	P40962	1.04141	0.20095	8	6	0.0585384
ATP-dependent permease MDL2, mitochondrial	P33311	1.04125	0.253488	13	12	0.0583167
Serine/threonine-protein kinase KSP1	P38691	1.04115	0.361197	8	7	0.0581736
DNA damage checkpoint protein LCD1	Q04377	1.04094	0.401157	17	15	0.0578918
Protein SUE1, mitochondrial	Q06524	1.04092	0.125803	5	5	0.0578557
Lon protease homolog, mitochondrial	P36775	1.04091	0.18318	20	19	0.0578422
DNA topoisomerase 1	P04786	1.0408	0.139336	25	24	0.0576944
Methylenetetrahydrofolate reductase 2	P53128	1.0408	0.512416	4	4	0.0576924
Aspartate--tRNA ligase, mitochondrial	P15179	1.04062	0.304917	9	8	0.057438
ATP synthase subunit 5, mitochondrial	P09457	1.04054	0.627062	1	1	0.0573375
Suppressor protein SRP40	P32583	1.04036	0.670676	2	2	0.0570791
Hydrophilin YNL190W	P53872	1.04033	0.798978	2	2	0.0570417
RNA polymerase II holoenzyme cyclin-like subunit	P47821	1.04007	0.360342	18	13	0.0566747
E3 SUMO-protein ligase SIZ1	Q04195	1.03998	0.527701	10	10	0.0565504
ER membrane protein complex subunit 4	P53073	1.03992	0.497814	2	2	0.056479
Uncharacterized protein YIL002W-A	Q3E7Z5	1.03991	0.831907	2	2	0.056462
Protein SRL2	Q12020	1.03989	0.538221	4	4	0.0564283
Signal recognition particle subunit SRP72	P38688	1.03986	0.198458	18	17	0.056388
Putative transcriptional activator MSA2	P36157	1.03974	0.763716	1	1	0.0562181
Translation termination inhibitor protein ITT1	Q04638	1.03971	0.54372	3	3	0.0561746
mRNA-binding protein PUF2	Q12221	1.03929	0.344255	9	7	0.0556033
Structural maintenance of chromosomes protein 1	P32908	1.03929	0.191132	43	31	0.0556016
Ornithine aminotransferase	P07991	1.0392	0.180224	3	3	0.0554729
54S ribosomal protein L20, mitochondrial	P22354	1.03909	0.377504	5	5	0.0553185
Vacuolar protein sorting-associated protein 17	P32913	1.03909	0.615707	7	7	0.0553177
Phospho-2-dehydro-3-deoxyheptonate aldolase, tyrosine-inhibited	P32449	1.03907	0.373174	12	10	0.0552931
Co-chaperone protein SBA1	P28707	1.03901	0.529775	28	5	0.0552058
Protein DSF2	P38213	1.03897	0.561696	5	4	0.0551501
Arginase	P36015	1.03885	0.043402	20	18	0.0549811
Serine/threonine-protein kinase KIN82	P25341	1.03879	0.414483	10	7	0.0549054
AP-1-like transcription factor YAP4	P40917	1.03877	0.724753	1	1	0.0548731
Translocation protein SEC66	P33754	1.03873	0.617544	6	6	0.0548244
Enoyl-[acyl-carrier protein] reductase [NADPH, B-specific], mitochondrial	P38071	1.03872	0.473313	11	1	0.05481
Phosphatidylserine decarboxylase proenzyme 2	P53037	1.03864	0.093455	15	14	0.0546952
Structural maintenance of chromosomes protein 3	P47037	1.03853	0.101957	29	18	0.0545387
Uncharacterized transporter YIL166C	P40445	1.0385	0.281787	14	11	0.0544962
5-oxoprolinase	P28273	1.0384	0.564102	15	14	0.0543622
Increased sodium tolerance protein 2	P38250	1.03821	0.103211	11	11	0.0541038
Drug resistance protein YOR378W	Q08902	1.03812	0.383687	4	4	0.0539678
Inhibitory regulator protein IRA1	P18963	1.03805	0.345373	29	24	0.0538766
Ubiquitin carboxyl-terminal hydrolase 11	P36026	1.03795	0.131148	11	8	0.0537384
Protein ECM8	P38246	1.03781	0.587105	3	3	0.0535428
Calcium/calmodulin-dependent protein kinase I	P27466	1.03766	0.665377	10	10	0.0533342
Peroxisomal membrane protein PEX15	Q08215	1.03743	0.484757	1	1	0.053008
Anaphase-promoting complex subunit 2	Q12440	1.03717	0.401024	12	11	0.0526545
Cytochrome c iso-2	P00045; P00044	1.03711	0.804978	2	1	0.0525645
Peroxisomal membrane protein PEX31	P53203	1.0371	0.545886	3	1	0.0525525
Ribose-phosphate pyrophosphokinase 3	P38689	1.03707	0.670074	4	4	0.052517
SIT4-associating protein SAP4	P53036	1.03698	0.692275	5	3	0.0523927
Citrate synthase 3, mitochondrial	P43635	1.03683	0.47126	8	8	0.052184
EH domain-containing and endocytosis protein 1	P34216	1.03682	0.285126	44	9	0.0521724
rRNA biogenesis protein RRP5	Q05022	1.03682	0.253141	18	15	0.0521641
PWWP domain-containing protein YLR455W	Q06188	1.03676	0.623075	2	2	0.0520875
Putative truncated L-serine dehydratase SDL1	P0CF22	1.03672	0.130639	2	2	0.0520317
Kinesin-like protein CIN8	P27895	1.03668	0.319454	11	6	0.0519748
Serine/threonine-protein kinase TOR2	P32600	1.03664	0.199744	49	42	0.05191
Glutathione reductase	P41921	1.03662	0.773782	32	4	0.0518863
Protein SHC1	P39000	1.03652	0.379685	10	8	0.0517515
1,3-beta-glucan synthase component FKS3	Q04952	1.0365	0.300092	42	16	0.0517219
Mediator of RNA polymerase II transcription subunit 6	P38782	1.03638	0.554606	1	1	0.0515512
Uncharacterized protein YGL036W	P53185	1.03615	0.758262	5	4	0.0512313
Protein MNE1	P24720	1.03594	0.042603	11	9	0.0509406
Acetyl-CoA acetyltransferase	P41338	1.03576	0.598974	16	6	0.0506904
Actin-binding protein	P15891	1.03558	0.609968	16	4	0.0504403
Protein GAL3	P13045	1.03546	0.494639	8	8	0.0502729
Protein CSF1	Q12150	1.0353	0.0431456	34	30	0.0500435
Uracil phosphoribosyltransferase	P18562	1.03529	0.54726	5	5	0.0500338
Putative uncharacterized protein YIM2	P28626	1.03517	0.0193815	3	3	0.0498739
RNA polymerase II-associated protein RBA50	Q04418	1.03514	0.283357	17	15	0.0498215
Nucleoporin NUP159	P40477	1.03503	0.431373	19	15	0.0496737
GTP:AMP phosphotransferase, mitochondrial	P26364	1.035	0.524912	3	3	0.0496327
Exocyst complex component EXO84	P38261	1.03491	0.163564	17	14	0.0495092
Protein MNN4	P36044	1.03491	0.529461	21	19	0.0495081
Cell division control protein 7	P06243	1.03483	0.288655	20	11	0.0493911
U3 small nucleolar RNA-associated protein 15	Q04305	1.03479	0.31899	3	3	0.0493408
tRNA-specific adenosine deaminase 1	P53065	1.03454	0.592747	3	3	0.0489919
U1 small nuclear ribonucleoprotein 70 kDa homolog	Q00916	1.03452	0.31851	11	8	0.0489606
Phosphomannomutase	P07283	1.03446	0.222803	6	5	0.0488736
Anaphase-promoting complex subunit 11	Q12157	1.03444	0.750571	3	2	0.0488471
Cardiolipin synthase (CMP-forming)	Q07560	1.03443	0.739417	3	3	0.0488383
Ribonuclease P protein component, mitochondrial	Q02773	1.03441	0.327558	21	20	0.0488147
Guanine nucleotide exchange factor subunit RIC1	P40395	1.03438	0.0939366	10	10	0.0487661
Lariat debranching enzyme	P24309	1.03426	0.623935	6	6	0.0486033
Pro-apoptotic serine protease NMA111	P53920	1.03405	0.809354	6	6	0.0482998
Mitochondrial inner membrane i-AAA protease supercomplex subunit MGR1	P25573	1.03399	0.108946	12	10	0.0482282
Multivesicular body sorting factor 12	P42939	1.03396	0.531514	7	6	0.0481789
25S rRNA (cytosine(2278)-C(5))-methyltransferase	P53972	1.03394	0.276753	5	5	0.0481489
U4/U6 small nuclear ribonucleoprotein PRP3	Q03338	1.03382	0.325359	18	17	0.0479783
Putative uncharacterized protein YLR279W	O13540	1.03368	0.580697	2	2	0.0477877
Phosphomevalonate kinase	P24521	1.03364	0.697354	5	5	0.0477287
SVF1-like protein YDR222W	Q04925	1.03358	0.761817	5	5	0.0476475
Spermidine synthase	Q12074	1.03355	0.667384	8	2	0.0476098
Sister chromatid cohesion protein PDS5	Q04264	1.03351	0.545769	17	15	0.047555
Histone-lysine N-methyltransferase, H3 lysine-4 specific	P38827	1.03349	0.41486	30	23	0.0475235
Adenylate cyclase	P08678	1.03338	0.352482	22	17	0.0473704
Squalene synthase	P29704	1.0333	0.660988	10	8	0.0472606
Uncharacterized protein IRC10	Q08118	1.03322	0.0800344	19	17	0.0471405
RNA-binding protein NAB6	Q03735	1.03317	0.104336	15	12	0.0470794
26S protease regulatory subunit 8 homolog	Q01939	1.03305	0.537322	20	14	0.0469045
60S ribosomal protein L23-A	P0CX41	1.03296	0.209691	1	1	0.0467807
54S ribosomal protein L35, mitochondrial	Q06678	1.03293	0.679585	5	5	0.0467438
Peroxisomal membrane protein PEX28	P38848	1.03289	0.708902	12	9	0.0466805
Uncharacterized protein YPL272C	Q08984	1.03277	0.580345	3	3	0.0465172
Putative uncharacterized protein YML009W-B	Q6B0Y1	1.03263	0.521591	1	1	0.0463199
tRNA (cytidine(32)/guanosine(34)-2'-O)-methyltransferase	P38238	1.03257	0.238998	15	9	0.0462426
Protein PSP2	P50109	1.03254	0.523329	12	10	0.0461938
Protein LTV1	P34078	1.03253	0.615205	4	3	0.0461784
Nucleolar pre-ribosomal-associated protein 2	P47108	1.03244	0.357796	22	17	0.0460606
Assembly-complementing factor 4	P47129	1.03231	0.641113	2	2	0.0458829
Oligo-1,6-glucosidase IMA1	P53051	1.0322	0.384071	17	13	0.045724
Y' element ATP-dependent helicase protein 1 copy 3	P0CX14	1.03214	0.325723	24	21	0.0456359
ABC transporter NFT1	P0CE68	1.03213	0.355191	19	15	0.0456224
Coenzyme A biosynthesis protein 3	P36076	1.03211	0.881077	2	2	0.0455915
CCR4-NOT transcriptional complex subunit CAF120	P53836	1.0321	0.130051	20	20	0.045585
Autophagy-related protein 2	P53855	1.03208	0.271507	10	8	0.045556
Probable phospholipid-transporting ATPase NEO1	P40527	1.03174	0.278389	15	12	0.0450776
Karyogamy protein KAR9	P32526	1.03173	0.517714	5	5	0.0450675
Lysophosphatidic acid:oleoyl-CoA acyltransferase 1	Q06508	1.03159	0.54382	3	3	0.044869
DNA-(apurinic or apyrimidinic site) lyase 1	P22936	1.03147	0.824073	1	1	0.0446987
U3 small nucleolar ribonucleoprotein protein IMP4	P53941	1.03135	0.0822046	10	9	0.0445313
tRNA wybutosine-synthesizing protein 3	P53177	1.03132	0.215142	5	5	0.0444867
Putative uncharacterized protein YER172C-A	A0A023PYF7	1.03122	0.822416	1	1	0.0443455
Serine/threonine-protein kinase CBK1	P53894	1.03107	0.508507	6	5	0.0441451
Ferric/cupric reductase transmembrane component 1	P32791	1.03099	0.640788	3	3	0.0440313
Serine/threonine-protein kinase PTK2/STK2	P47116	1.03087	0.637189	3	3	0.0438668
Trafficking protein particle complex II-specific subunit 65	P32893	1.03074	0.551131	6	6	0.0436821
Nuclear mRNA export protein SAC3	P46674	1.03069	0.41561	13	11	0.0436147
ATPase expression protein 2, mitochondrial	P22136	1.03067	0.063882	11	11	0.043586
Protein HRB1	P38922	1.03064	0.451484	8	8	0.0435449
Imitation switch two complex protein 1	P53125	1.03059	0.242038	23	19	0.0434769
Uncharacterized protein YER158C	P40095	1.03035	0.0658239	3	3	0.0431341
Uncharacterized transcriptional regulatory protein TBS1	P38114	1.03033	0.300735	21	19	0.0431129
Protein GAT3	Q07928	1.03014	0.165863	28	27	0.0428374
Enhancer of polycomb-like protein 1	P43572	1.03013	0.68378	14	11	0.0428256
Sporulation-specific protein 71	Q03868	1.03009	0.234957	24	22	0.0427643
Bud site selection protein 3	P25558	1.03007	0.694062	18	18	0.0427486
3-hydroxy-3-methylglutaryl-coenzyme A reductase 1	P12683	1.0299	0.304339	17	13	0.0424985
Phosphatidylinositol transfer protein CSR1	Q06705	1.02979	0.216444	5	5	0.0423499
Isocitrate dehydrogenase [NADP] cytoplasmic	P41939	1.02976	0.0321308	3	3	0.0423078
Protein MRH1	Q12117	1.02969	0.821022	2	2	0.042215
RNA polymerase I-specific transcription initiation factor RRN9	P53437	1.0292	0.710981	6	5	0.0415302
Protein IBD2	P53892	1.02914	0.557719	6	5	0.0414341
Serine/threonine-protein kinase RIO1	Q12196	1.02909	0.451321	9	9	0.0413693
Protein ATP11, mitochondrial	P32453	1.02909	0.35862	7	6	0.0413646
DNA-directed RNA polymerase III subunit RPC9	P47076	1.029	0.613735	2	1	0.0412494
Increased copper sensitivity protein 2	P38284	1.02894	0.00808933	7	7	0.0411541
Mitochondrial import inner membrane translocase subunit TIM50	Q02776	1.02881	0.771189	14	9	0.0409744
Meiosis-specific protein SPO11	P23179	1.0288	0.0807337	14	12	0.0409571
Antiviral helicase SLH1	P53327	1.02871	0.780256	17	15	0.0408297
[Pyruvate dehydrogenase [acetyl-transferring]]-phosphatase 2, mitochondrial	P25646	1.02867	0.0728709	14	11	0.0407744
Trehalose-phosphatase	P31688	1.02842	0.475454	27	16	0.040426
MAP-homologous protein 1	P43638	1.02822	0.410839	35	30	0.0401431
Nuclear polyadenylated RNA-binding protein 3	P38996	1.02817	0.671202	5	5	0.0400801
Uncharacterized protein YJR142W	P47173	1.02816	0.649175	3	2	0.0400714
Probable mannosyltransferase YUR1	P26725	1.02808	0.487466	6	6	0.0399483
Dynamin-like GTPase MGM1, mitochondrial	P32266	1.02805	0.460114	24	23	0.039912
Transketolase 1	P23254	1.02794	0.492095	37	8	0.039759
Neutral trehalase	P32356	1.0279	0.797904	8	6	0.0397014
Ureidoglycolate lyase	P32459	1.02787	0.712566	1	1	0.0396614
Sulfite reductase [NADPH] flavoprotein component	P39692	1.02785	0.1759	12	8	0.0396294
40S ribosomal protein S24-A	P0CX31	1.02782	0.238025	7	6	0.0395915
Ferric reductase transmembrane component 5	Q08908	1.02773	0.669	26	6	0.0394642
Inactive deaminase YJL070C	P40361	1.02767	0.303337	12	11	0.0393768
RNA polymerase I termination factor	Q12457	1.02765	0.211342	19	17	0.0393557
N-terminal acetyltransferase A complex subunit NAT1	P12945	1.02758	0.511747	22	16	0.0392522
Quinidine resistance protein 3	P38227	1.02756	0.808886	6	4	0.0392193
Pre-mRNA-splicing factor SLU7	Q02775	1.02753	0.546802	9	8	0.0391759
3-oxoacyl-[acyl-carrier-protein] reductase	P35731	1.0274	0.394409	3	2	0.0389919
N-glycosylation protein EOS1	P53938	1.02735	0.12372	10	9	0.0389324
Cytochrome b-c1 complex subunit 2, mitochondrial	P07257	1.02727	0.0507348	9	1	0.0388153
Homoaconitase, mitochondrial	P49367	1.02709	0.476878	9	8	0.038565
MIOREX complex component 3	P38172	1.02707	0.715967	6	5	0.0385344
Uncharacterized membrane protein YGR026W	P53217	1.02707	0.662992	3	3	0.0385319
Putative ATP-dependent RNA helicase ECM32	P32644	1.02684	0.0141961	19	17	0.0382175
37S ribosomal protein S10, mitochondrial	Q03201	1.02675	0.217873	1	1	0.0380862
Phosphoribosylaminoimidazole-succinocarboxamide synthase	P27616	1.02668	0.648874	10	1	0.0379868
Uncharacterized oxidoreductase YNL181W	P53878	1.02658	0.23408	5	4	0.0378417
Kinetochore protein NDC80	P40460	1.02648	0.799256	10	9	0.0377086
U3 small nucleolar RNA-associated protein 7	P40055	1.0264	0.452891	18	15	0.0375877
PHO85 cyclin-8	Q08966	1.02637	0.267931	8	6	0.0375454
Uncharacterized protein YGR237C	P50089	1.02635	0.736973	9	6	0.0375249
Asparagine--tRNA ligase, mitochondrial	P25345	1.02626	0.612524	7	5	0.0373968
GTPase-interacting component 2	Q06648	1.02624	0.567447	2	2	0.0373746
Serine/threonine-protein kinase PSK1	P31374	1.02624	0.553409	12	11	0.0373708
Something about silencing protein 5	Q99314	1.02608	0.837377	4	4	0.0371384
tRNA pseudouridine synthase 1	Q12211	1.02607	0.260347	112	99	0.0371303
Uncharacterized oxidoreductase AIM33	Q04516	1.02605	0.3748	16	13	0.0371065
54S ribosomal protein L31, mitochondrial	P14063	1.02585	0.786733	5	4	0.0368143
Putative uncharacterized protein YDR401W	O13523	1.02582	0.445019	1	1	0.0367815
Zinc-regulated transporter 2	Q12436	1.02582	0.684477	4	2	0.0367812
CWF19-like protein DRN1	P53255	1.02573	0.681144	3	2	0.0366474
Prefoldin subunit 6	P52553	1.02572	0.450431	5	1	0.0366382
Peroxisomal biogenesis factor 3	P28795	1.0256	0.556564	8	7	0.0364615
Ubiquitin carboxyl-terminal hydrolase 6	P43593	1.02555	0.789947	5	5	0.0364031
DNA-directed RNA polymerase II subunit RPB11	P38902	1.02553	0.370386	7	7	0.03637
Histone acetyltransferase RTT109	Q07794	1.02553	0.535708	4	4	0.0363648
Topoisomerase 1-associated factor 2	Q02208	1.02551	0.187152	10	10	0.0363356
Golgi SNAP receptor complex member 1	P38736	1.0255	0.0373067	4	4	0.0363263
Vacuolar-sorting protein BRO1	P48582	1.02544	0.460818	28	26	0.036241
Protein GIR2	Q03768	1.02538	0.54085	5	5	0.0361651
ER membrane protein complex subunit 3	P36039	1.02527	0.811279	1	1	0.0360029
Exocyst complex component SEC3	P33332	1.0252	0.379627	23	20	0.0359005
Glutathione S-transferase omega-like 1	P48239	1.02518	0.47397	11	10	0.0358765
Uncharacterized transporter YHL008C	P38750	1.02517	0.423335	3	3	0.0358594
Sporulation protein RMD6	P39975	1.02499	0.72768	11	9	0.0356167
Aminodeoxychorismate lyase	Q03266	1.02495	0.161015	4	4	0.035547
Protein SCP160	P06105	1.0249	0.538211	14	11	0.0354897
Protein PAC2	P39937	1.02453	0.778291	9	8	0.0349647
High temperature lethal protein 1	Q9URQ5	1.02453	0.322137	3	1	0.034957
S-adenosylmethionine permease SAM3	Q08986	1.0245	0.548914	8	7	0.0349195
Putative COX1/OXI3 intron 2 protein	P03876	1.02441	0.42278	10	8	0.0347991
Nucleoporin GLE1	Q12315	1.0244	0.558668	12	9	0.0347852
BNI1-related protein 1	P40450	1.02439	0.0337228	24	22	0.0347642
Importin subunit beta-3	P40965	1.02424	0.0429986	82	68	0.034557
DNA replication regulator SLD2	P34252	1.0241	0.207702	8	8	0.0343586
Cytochrome c heme lyase	P06182	1.02406	0.667981	1	1	0.0343062
Glutaredoxin-1	P25373	1.02406	0.385941	13	6	0.0342947
Dipeptidyl aminopeptidase B	P18962	1.02396	0.595015	7	7	0.0341538
Cell division control protein 10	P25342	1.02373	0.729911	4	3	0.033835
DNA-directed RNA polymerase I subunit RPA190	P10964	1.02363	0.450931	38	34	0.0336938
Pentafunctional AROM polypeptide	P08566	1.02341	0.568443	23	16	0.0333882
Sec sixty-one protein homolog	P38353	1.02308	0.811026	6	4	0.0329129
Reticulon-like protein 1	Q04947	1.02297	0.618788	11	4	0.0327568
Uncharacterized protein YKL187C	P34231	1.02268	0.723717	3	3	0.0323505
MIOREX complex component 1	P40050	1.02262	0.145122	14	12	0.0322713
Putative glucokinase-2	Q04409	1.02258	0.491508	4	4	0.0322174
Ferric reductase transmembrane component 4	P53746	1.02251	0.611079	17	16	0.0321094
Putative lipase YOR059C	Q08448	1.02246	0.124396	12	9	0.0320436
Protein CBP3, mitochondrial	P21560	1.0224	0.428522	14	11	0.0319644
Uncharacterized protein YMR316C-A	I2HB70	1.02237	0.822548	1	1	0.03192
Uncharacterized protein YKL075C	P36083	1.02232	0.437172	4	4	0.0318427
Putative uncharacterized protein YER023C-A	Q8TGP2	1.022	0.803795	1	1	0.0313907
High-affinity potassium transport protein	P12685	1.02197	0.0422855	16	15	0.0313491
C-1-tetrahydrofolate synthase, cytoplasmic	Q06608	1.02181	0.166602	15	14	0.0311208
Negative growth regulatory protein NGR1	P32831	1.02179	0.418658	5	5	0.0310919
Cytochrome b2, mitochondrial	P00175	1.02167	0.841566	10	9	0.0309262
Mitochondrial MYO2 receptor-related protein 1	Q06324	1.02158	0.6848	4	4	0.0307997
UPF0662 protein YPL260W	Q08977	1.02137	0.422599	2	2	0.0305097
40S ribosomal protein S20	P38701	1.02132	0.54298	7	2	0.0304325
Carnitine O-acetyltransferase YAT2	P40017	1.02129	0.491709	7	7	0.0303969
Sporulation-specific protein 74	P45819	1.02098	0.802141	4	4	0.0299534
Nucleolar protein 58	A6ZPE5; Q12499	1.02091	0.542469	15	4	0.0298498
Elongation factor 3B	P53978	1.0209	0.742232	12	11	0.0298417
Serine/threonine-protein kinase CAK1	P43568	1.02071	0.839689	3	3	0.0295718
Membrane-anchored lipid-binding protein SIP3	P38717	1.02069	0.286171	26	21	0.0295436
Uncharacterized protein YDL176W	Q12027	1.02067	0.796886	11	9	0.0295234
26S proteasome regulatory subunit RPN1	P38764	1.02066	0.433779	8	7	0.0295033
Mitochondrial intermembrane space cysteine motif-containing protein MIX17	Q03667	1.02051	0.922201	2	2	0.0292921
ARF guanine-nucleotide exchange factor 1	P47102	1.02046	0.602907	14	14	0.0292155
Uncharacterized protein YHR182W	P38870	1.02045	0.646102	14	14	0.0292125
Gamma-glutamyltransferase	Q05902	1.02043	0.824861	5	4	0.0291764
COPII coat assembly protein SEC16	P48415	1.02041	0.537006	13	10	0.0291533
Superoxide dismutase 1 copper chaperone	P40202	1.02025	0.643207	7	3	0.02892
ER membrane protein complex subunit 2	P47133	1.02024	0.752365	3	3	0.028914
Aconitate hydratase, mitochondrial	P19414	1.02023	0.729998	11	10	0.0288934
Very long-chain fatty acid transport protein	P38225	1.02019	0.534123	15	14	0.0288368
Chitin synthase 3	P29465	1.0199	0.669271	10	10	0.028428
Nucleolar complex protein 2	P39744	1.0199	0.616234	11	11	0.0284226
Putative uncharacterized protein YMR082C	Q04276	1.01982	0.425961	3	3	0.0283159
Nucleoporin POM34	Q12445	1.01982	0.669107	10	6	0.0283129
Intron-encoded DNA endonuclease aI5 beta	Q9ZZX0	1.01981	0.564445	14	12	0.0282951
DNA-directed RNA polymerases I, II, and III subunit RPABC1	P20434	1.0198	0.735263	6	6	0.0282793
UPF0160 protein YER156C	P40093	1.01977	0.723204	5	4	0.0282403
Uncharacterized protein YIL102C	P40488	1.01976	0.64924	6	6	0.0282281
Pheromone-processing carboxypeptidase KEX1	P09620	1.01975	0.650474	4	4	0.028222
SWI5-dependent HO expression protein 2	P36068	1.01974	0.830301	1	1	0.0282
Cytoplasmic 60S subunit biogenesis factor REH1	Q06709	1.0197	0.739311	5	5	0.0281377
ADP-ribosylation factor-like protein 3	Q02804	1.01966	0.814679	2	2	0.028087
Regulatory protein SIR3	P06701	1.01958	0.470242	48	25	0.0279718
Ribosome-interacting GTPase 2	P53295	1.01951	0.621756	9	8	0.0278691
Nucleoporin NUP57	P48837	1.01925	0.662211	5	5	0.0275133
DNA repair and recombination protein RAD54	P32863	1.01921	0.385278	27	25	0.0274505
Protein CRT10	Q08226	1.01918	0.85977	15	10	0.0274083
Protein LAS1	P36146	1.01911	0.145233	15	12	0.0273148
Pre-mRNA-splicing factor 18	P33411	1.01908	0.846619	4	4	0.0272725
Tyrosine-protein phosphatase-like protein OCA2	P53949	1.01885	0.754659	10	10	0.0269457
DNA repair protein RAD2	P07276	1.01878	0.767109	15	13	0.0268386
6-phosphofructo-2-kinase 1	P40433	1.01862	0.496913	14	13	0.0266099
Ino eighty subunit 4	Q08561	1.01852	0.711164	6	3	0.0264703
Mannosyl-oligosaccharide glucosidase	P53008	1.01838	0.462131	12	11	0.0262811
Arginine metabolism regulation protein II	P05085	1.01836	0.377119	7	6	0.0262513
Isocitrate dehydrogenase [NADP]	P53982	1.01821	0.126294	7	7	0.0260302
Putative uncharacterized protein YEL009C-A	A0A023PZF2	1.01815	0.48611	5	1	0.0259505
eIF-2-alpha kinase activator GCN1	P33892	1.01805	0.607033	32	28	0.0258142
Cytochrome c oxidase polypeptide 5B, mitochondrial	P00425	1.01798	0.289639	3	3	0.0257074
54S ribosomal protein L40, mitochondrial	P36534	1.01798	0.806139	3	3	0.025707
Pre-mRNA-splicing factor PRP46	Q12417	1.0179	0.216168	7	6	0.0256003
Endo-1,3(4)-beta-glucanase 2	Q12168	1.0179	0.757133	3	3	0.0255915
Uncharacterized protein YML079W	Q03629	1.01786	0.412772	26	4	0.0255326
Probable phospholipid-transporting ATPase DNF3	Q12674	1.01763	0.414246	38	25	0.025219
5'-3' exoribonuclease 2	Q02792	1.01752	0.810778	17	16	0.0250537
Topoisomerase 1-associated factor 1	P53840	1.01744	0.382455	16	16	0.0249474
Chromatin structure-remodeling complex subunit RSC7	P32832	1.0174	0.741209	10	7	0.024885
Sterol esterase TGL1	P34163	1.01734	0.822385	8	7	0.0247969
Truncated transposon Ty1-A Gag-Pol polyprotein	O13527	1.01725	0.61277	14	13	0.0246775
Protein ECM18	Q04623	1.01723	0.587158	48	36	0.0246504
Abhydrolase domain-containing protein IMO32	P53219	1.01714	0.825768	7	5	0.0245224
40S ribosomal protein S5	P26783	1.01712	0.81699	14	4	0.0244889
GLC7-interacting protein 2	P40036	1.01698	0.45283	9	9	0.0242933
Uncharacterized membrane protein YBR220C	P38318	1.0169	0.930205	2	2	0.024177
Protein SST2	P11972	1.01686	0.108666	7	7	0.0241248
Nuclear envelope protein YPR174C	Q06616	1.01674	0.535448	13	10	0.0239557
Restriction of telomere capping protein 1	Q08281	1.01671	0.300909	14	12	0.0239027
Uncharacterized protein YFR016C	P43597	1.01659	0.585204	13	11	0.0237334
Uroporphyrinogen-III C-methyltransferase	P36150	1.01632	0.891528	6	6	0.0233535
Eisosome protein SEG1	Q04279	1.01629	0.336155	10	9	0.0233171
DNA topoisomerase 2	P06786	1.01621	0.482321	32	23	0.0231968
Ectonucleotide pyrophosphatase/phosphodiesterase 1	P25353	1.0162	0.756406	11	10	0.0231871
ERAD-associated E3 ubiquitin-protein ligase component HRD3	Q05787	1.01614	0.771169	7	7	0.0230982
Fumarate reductase 1	P32614	1.01608	0.429949	7	7	0.0230185
Outer spore wall protein LDS1	P31379	1.01608	0.940222	1	1	0.0230151
Uncharacterized protein YNL050C	P53952	1.01604	0.22196	5	4	0.022953
Phosphatidylinositol 3-phosphate-binding protein 2	P53191	1.01572	0.747295	6	6	0.0225071
60S ribosome subunit biogenesis protein NOP8	Q08287	1.01569	0.712103	5	5	0.0224578
Eukaryotic translation initiation factor 3 subunit J	Q05775	1.01565	0.71715	14	3	0.0224013
Uncharacterized protein YBL010C	P32788	1.01561	0.829604	2	2	0.0223474
Protein MIF2	P35201	1.01548	0.291933	3	2	0.022156
ATP synthase subunit gamma, mitochondrial	P38077	1.01535	0.833771	8	8	0.0219795
MIOREX complex component 9	Q07349	1.01514	0.695822	8	7	0.0216758
Protein SHQ1	P40486	1.01511	0.755594	3	2	0.02164
Repressor of RNA polymerase III transcription MAF1	P41910	1.0151	0.534873	6	5	0.0216197
DNA damage checkpoint control protein RAD17	P48581	1.01498	0.848098	4	2	0.021452
Putative uncharacterized protein YKL053W	P35733	1.01487	0.873894	4	3	0.0212909
Fructose-2,6-bisphosphatase	P32604	1.01485	0.573499	9	9	0.0212669
Dihydroxy-acid dehydratase, mitochondrial	P39522	1.01482	0.886052	12	11	0.0212293
Phospholipid-transporting ATPase DNF1	P32660	1.01479	0.348067	24	21	0.0211857
2,5-diamino-6-ribosylamino-4(3H)-pyrimidinone 5'-phosphate reductase	P33312	1.01467	0.730249	30	17	0.0210152
DNA polymerase alpha subunit B	P38121	1.01466	0.793198	9	9	0.0209996
ATP-dependent RNA helicase HCA4	P20448	1.01457	0.629694	14	12	0.0208715
FACT complex subunit SPT16	P32558	1.01429	0.475192	10	10	0.0204685
Uncharacterized protein YFR020W	P43600	1.01425	0.959834	2	1	0.0204167
2-oxoglutarate dehydrogenase, mitochondrial	P20967	1.01424	0.817136	11	10	0.0204056
Protein ECM30	Q06673	1.01411	0.730173	7	6	0.0202138
Protein farnesyltransferase subunit beta	P22007	1.01406	0.791794	7	6	0.0201499
PAB-dependent poly(A)-specific ribonuclease subunit PAN3	P36102	1.01406	0.421072	28	27	0.0201399
ATP-dependent rRNA helicase SPB4	Q08693	1.01404	0.476236	7	7	0.0201106
Sporulation protein RMD8	P43620	1.01403	0.392668	10	9	0.0201032
Vacuolar protein sorting-associated protein 35	P34110	1.01403	0.581931	11	9	0.020099
Vacuolar segregation protein PEP7	P32609	1.014	0.488735	9	9	0.0200554
Nucleolar complex-associated protein 3	Q07896	1.01394	0.550138	11	7	0.0199723
Histone acetyltransferase SAS3	P34218	1.01387	0.593314	11	10	0.0198792
Putative uncharacterized protein YER006C-A	A0A023PXI8	1.01387	0.888202	1	1	0.0198741
Transcriptional activator FLO8	P40068	1.01386	0.67556	9	9	0.0198654
60S ribosomal protein L2-A	P0CX45	1.01384	0.748482	12	10	0.0198324
Target of rapamycin complex 2 subunit BIT61	P47041	1.01359	0.902776	3	2	0.019471
Protein PER1	P25625	1.01354	0.90717	2	2	0.0194015
Vacuolar transporter chaperone 2	P43585	1.0135	0.823997	18	16	0.019342
Oxysterol-binding protein homolog 6	Q02201	1.01347	0.788829	7	6	0.019309
A-factor-processing enzyme	Q06010	1.01333	0.633055	25	20	0.0191103
Lactoylglutathione lyase	P50107	1.01332	0.654707	10	8	0.0190872
eIF-2-alpha kinase GCN2	P15442	1.01326	0.789126	20	17	0.0190079
Spindle pole body component SPC98	P53540	1.01325	0.186677	15	13	0.0189917
Meiosis-specific transcription factor NDT80	P38830	1.01325	0.799955	8	7	0.018987
Succinate dehydrogenase [ubiquinone] flavoprotein subunit 2, mitochondrial	P47052	1.0132	0.514813	10	9	0.0189231
Bifunctional protein GAL10	P04397	1.01312	0.822695	10	8	0.0188042
Spliceosomal protein DIB1	Q06819	1.01308	0.802978	2	1	0.0187429
Spindle pole component BBP1	Q12365	1.01302	0.195065	11	7	0.0186679
Flap endonuclease 1	P26793	1.0128	0.810446	7	7	0.0183514
Osmosensing histidine protein kinase SLN1	P39928	1.01276	0.90541	13	12	0.0182914
Alanine/arginine aminopeptidase	P37898	1.01276	0.453243	8	8	0.0182858
Probable alpha-1,6-mannosyltransferase MNN10	P50108	1.01261	0.87726	11	10	0.0180806
DNA replication ATP-dependent helicase/nuclease DNA2	P38859	1.01258	0.745037	15	13	0.0180413
Uncharacterized protein YLL007C	Q07799	1.01256	0.392574	18	17	0.018002
Long-chain-fatty-acid--CoA ligase 1	P30624	1.01245	0.565422	9	8	0.0178494
Protein SSD1	P24276	1.01219	0.945099	13	13	0.0174825
tRNA (uracil-O(2)-)-methyltransferase	Q02648	1.01191	0.640624	7	7	0.0170846
Serine/threonine-protein phosphatase 1 regulatory subunit GAC1	P28006	1.0119	0.847746	29	9	0.0170723
40S ribosomal protein S9-A	O13516	1.01183	0.589516	16	15	0.0169621
ATP-dependent RNA helicase DBP3	P20447	1.01162	0.748754	8	8	0.0166684
Fluconazole resistance protein 1	P38124	1.01161	0.721074	3	3	0.0166602
Cytochrome c lysine N-methyltransferase 1	P38818	1.01157	0.797174	6	6	0.0166006
Glycerol-3-phosphate O-acyltransferase 1	P32784	1.0114	0.482839	7	6	0.0163501
Pheromone receptor transcription factor	P11746	1.01138	0.660029	4	3	0.0163224
Meiotic mRNA stability protein kinase SSN3	P39073	1.01136	0.672714	20	18	0.0162979
Protein MUM3	Q08750	1.01132	0.766785	8	8	0.0162354
Central kinetochore subunit AME1	P38313	1.01114	0.863023	3	3	0.0159861
Carbon catabolite-derepressing protein kinase	P06782	1.01108	0.813486	5	5	0.0158991
Putative uncharacterized protein YDL213W-A	Q00590	1.01106	0.436075	1	1	0.01587
Protein SLA2	P33338	1.01106	0.656759	9	9	0.015867
Nucleoporin NUP133	P36161	1.01094	0.845919	6	6	0.0157007
Origin recognition complex subunit 4	P54791	1.01094	0.813401	6	6	0.0156976
Repressible alkaline phosphatase	P11491	1.01092	0.595039	14	12	0.015673
Dynein heavy chain, cytoplasmic	P36022	1.01091	0.646275	55	42	0.0156545
U3 small nucleolar RNA-associated protein 12	Q12220	1.01074	0.230464	138	109	0.0154083
Putative uncharacterized protein YHL042W	P38729	1.0107	0.928007	5	5	0.015357
Protein NIP100	P33420	1.01069	0.90603	6	6	0.0153474
Biogenesis of lysosome-related organelles complex 1 subunit BLS1	Q06071	1.01057	0.930106	2	2	0.0151657
Uncharacterized protein YGR168C	P53293	1.01024	0.739848	5	4	0.0147015
Vacuolar protein sorting-associated protein 53	P47061	1.01017	0.833982	15	12	0.0146034
Trimethylguanosine synthase	Q12052	1.01013	0.507632	8	8	0.0145386
Dolichyl-phosphate-mannose--protein mannosyltransferase 3	P47190	1.01008	0.641244	8	5	0.0144729
Putative uncharacterized protein YLR255C	O13574	1.00986	0.874324	1	1	0.0141618
Transcriptional activator HAC1	P41546	1.00972	0.836249	5	4	0.013962
Ribosomal lysine N-methyltransferase 2	Q03942	1.00968	0.897864	1	1	0.0139022
Pyruvate decarboxylase isozyme 2	P16467	1.00961	0.86352	19	8	0.0138003
Mitochondrial distribution and morphology protein 32	Q12171	1.0096	0.238105	10	7	0.013787
S-adenosyl-L-methionine-dependent tRNA 4-demethylwyosine synthase	Q08960	1.00957	0.734651	16	15	0.0137448
Mitochondrial import receptor subunit TOM40	P23644	1.00954	0.942973	2	2	0.0137049
Homoserine dehydrogenase	P31116	1.00954	0.811232	8	1	0.0136981
Maintenance of telomere capping protein 4	P38335	1.00953	0.337098	51	46	0.0136858
Probable tubulin--tyrosine ligase PBY1	P38254	1.00951	0.867052	6	5	0.0136588
Low-affinity potassium transport protein	P28584	1.00947	0.855769	20	9	0.0136048
Uncharacterized protein YIR016W	P40572	1.0094	0.960936	1	1	0.0134955
CTP synthase 1	P28274	1.00936	0.665031	12	9	0.0134458
Nucleoporin NUP84	P52891	1.00934	0.814364	7	6	0.0134098
Probable dipeptidyl peptidase 3	Q08225	1.00934	0.797186	6	6	0.0134053
Uncharacterized transporter ESBP6	P53918	1.00912	0.426837	5	5	0.0130947
UPF0001 protein YBL036C	P38197	1.009	0.850955	1	1	0.0129213
Glycerol-3-phosphate dehydrogenase, mitochondrial	P32191	1.00899	0.830057	8	8	0.0129076
rRNA-processing protein FCF1	Q05498	1.00891	0.927142	9	6	0.0127997
Uncharacterized protein YJR098C	P47139	1.00889	0.868664	7	6	0.0127699
Protein ATS1	P31386	1.0087	0.903308	6	3	0.0124969
Uncharacterized protein YPL066W	Q12194	1.00864	0.92737	10	1	0.0124161
Thioredoxin reductase 1	P29509	1.00853	0.961026	2	2	0.0122521
Pyruvate kinase 1	P00549	1.0085	0.748465	157	24	0.0122177
Low affinity vacuolar monovalent cation/H(+) antiporter	P42839	1.00845	0.876638	7	5	0.0121425
Putative increased recombination centers protein 14	Q08522	1.0084	0.948154	15	1	0.0120623
Eukaryotic translation initiation factor 3 subunit G	Q04067	1.00837	0.943405	3	3	0.0120274
37S ribosomal protein MRP10, mitochondrial	O75012	1.00829	0.877871	2	2	0.0119129
Transcriptional regulatory protein SIN3	P22579	1.00818	0.877843	13	13	0.0117543
Copper transport protein 86	P25355	1.00806	0.794277	12	10	0.0115825
Protein ERD1	P16151	1.00789	0.829388	5	3	0.0113328
Guanine nucleotide exchange factor subunit RGP1	P25356	1.00779	0.747005	319	245	0.0111976
Outer spore wall protein 1	Q08692	1.00759	0.610591	10	9	0.0109026
Nuclear fusion protein BIK1	P11709	1.00741	0.838195	9	7	0.0106459
Uncharacterized protein YNL140C	P53910	1.00733	0.869686	4	4	0.0105351
Histone chaperone RTT106	P40161	1.00726	0.81787	5	5	0.0104339
Protein BNI1	P41832	1.00724	0.83502	31	25	0.0104092
Partitioning protein REP1	P03871	1.00723	0.833182	5	5	0.0103962
Uncharacterized protein VPS63	O13549	1.00722	0.523501	6	6	0.0103842
Altered inheritance of mitochondria protein 34, mitochondrial	Q03673	1.00715	0.804523	7	7	0.0102842
Dipeptidyl aminopeptidase A	P33894	1.0069	0.404774	10	10	0.0099225
Oligoribonuclease, mitochondrial	P54964	1.00667	0.807552	3	3	0.0095937
DNA primase small subunit	P10363	1.00667	0.949823	8	8	0.00958647
Nuclear protein STH1/NPS1	P32597	1.00665	0.837153	22	21	0.00956912
26S proteasome regulatory subunit RPN2	P32565	1.00661	0.780959	13	13	0.00950105
Protein BMH2	P34730; P29311	1.00658	0.849466	205	13	0.00946282
Phenylalanine--tRNA ligase alpha subunit	P15625	1.00656	0.925535	10	9	0.00943945
Histone H4	P02309	1.0065	0.900007	3	1	0.00934731
PH domain-containing protein YHR131C	P38835	1.00645	0.567679	9	9	0.00928233
CUE domain-containing protein 3	P53137	1.00643	0.906736	10	7	0.00925293
Bud site selection protein 7	Q08754	1.00624	0.858476	21	16	0.00897874
Asparagine synthetase domain-containing protein YML096W	Q04489	1.00608	0.218272	14	12	0.00873811
Bud site selection protein 9	P53226	1.00607	0.91942	5	5	0.00872916
GTPase-activating protein SAC7	P17121	1.00606	0.872021	9	9	0.00872105
Protein PEA2	P40091	1.006	0.954202	6	6	0.00862996
Methionine aminopeptidase 1	Q01662	1.00593	0.949899	5	4	0.00852656
Periodic tryptophan protein 2	P25635	1.00584	0.831796	9	5	0.00840376
7-keto 8-aminopelargonic acid transporter	P53744	1.00582	0.857958	11	9	0.00837232
Putative protein lysine methyltransferase SET5	P38890	1.00572	0.633521	10	9	0.00823292
Iron-sulfur assembly protein 1	Q07821	1.0057	0.870154	8	6	0.00820152
Aminotriazole resistance protein	P13090	1.00554	0.770483	2	2	0.00796967
Uncharacterized protein YMR124W	P39523	1.00552	0.797451	54	50	0.00794874
G2/mitotic-specific cyclin-1	P24868	1.00552	0.906403	6	6	0.00793793
DNA ligase 4	Q08387	1.00543	0.561824	16	14	0.00781385
Regulatory protein GAL4	P04386	1.00534	0.88075	8	6	0.00767657
Probable histone deacetylase HOS2	P53096	1.00533	0.832008	14	12	0.00766306
Pre-mRNA-splicing factor CEF1	Q03654	1.00529	0.817453	13	8	0.00761873
DNA repair protein RAD5	P32849	1.00506	0.672115	16	13	0.00728209
Carnitine O-acetyltransferase, mitochondrial	P32796	1.00496	0.955319	17	17	0.00713991
Oleate activated transcription factor 3	P36023	1.00489	0.67071	16	15	0.00704423
Eukaryotic translation initiation factor 3 subunit C	P32497	1.00476	0.918357	11	10	0.00685049
DNA mismatch repair protein MSH3	P25336	1.00471	0.797322	18	18	0.00677713
Pheromone a factor receptor	P06783	1.00462	0.988579	1	1	0.00665262
Autophagy-related protein 18	P43601	1.00454	0.827071	6	6	0.00653043
Valine--tRNA ligase, mitochondrial	P07806	1.00448	0.899159	25	2	0.00644353
Putative COX1/OXI3 intron 1 protein	P03875	1.00438	0.920585	14	10	0.00629852
Serine/threonine-protein kinase YPK1	P12688	1.0043	0.753539	10	7	0.00619311
Sugar transporter STL1	P39932	1.00429	0.874987	3	3	0.00616982
Rho-type GTPase-activating protein 2	Q06407	1.0042	0.943244	14	14	0.00605235
Integral membrane protein SED5	Q01590	1.0042	0.979449	4	4	0.00604957
Mitochondrial nuclease	P08466	1.00418	0.952476	2	2	0.006022
Protein translocation protein SEC63	P14906	1.00418	0.918303	9	8	0.00601922
Histone H2A.1	P04911	1.00416	0.939233	7	4	0.00599225
Cyanamide hydratase DDI2	P0CH63	1.00415	0.847751	6	6	0.00598128
ABC transporter ATP-binding protein/permease PDR18	P53756	1.00415	0.940651	12	12	0.00597292
Nuclear cap-binding protein complex subunit 1	P34160	1.0041	0.730922	87	73	0.00589603
General transcriptional corepressor CYC8	P14922	1.00389	0.921094	5	5	0.00559449
Putative uncharacterized protein YDL034W	Q12448	1.00384	0.96724	3	2	0.00552753
APC/C activator protein CDC20	P26309	1.00376	0.9623	5	5	0.00541346
Serine/threonine-protein kinase ATG1	P53104	1.00376	0.9594	10	9	0.00540909
Protein SOK2	P53438	1.00364	0.959829	3	3	0.00523587
Signal recognition particle receptor subunit alpha homolog	P32916	1.00354	0.934432	5	5	0.00509138
Ribosome biogenesis protein TSR1	Q07381	1.00345	0.952721	7	6	0.00496577
13 kDa ribonucleoprotein-associated protein	P39990	1.00344	0.973742	22	3	0.00496093
Serine/threonine-protein kinase VPS15	P22219	1.0034	0.883016	16	13	0.00489767
Transcription factor CSR2	Q12734	1.00338	0.966421	12	11	0.00486956
Glucosidase 2 subunit beta	Q04924	1.00332	0.87148	14	12	0.00478368
Probable RNA exonuclease NGL3	Q03210	1.00319	0.926625	7	6	0.00458827
H/ACA ribonucleoprotein complex subunit 3	Q6Q547	1.00317	0.958165	3	3	0.00456544
DNA repair protein RAD7	P06779	1.00316	0.733201	87	75	0.00455248
Myosin-3	P36006	1.00313	0.938284	20	17	0.00450618
40S ribosomal protein S13	P05756	1.00304	0.819001	11	2	0.00437378
Trafficking protein particle complex II-specific subunit 130	Q03660	1.00297	0.876694	20	17	0.00427329
ATP-dependent RNA helicase eIF4A	A6ZQJ1;P10081	1.00294	0.906609	56	11	0.00424019
Protein FMP27, mitochondrial	Q06179	1.00294	0.797686	58	46	0.00423642
MutS protein homolog 5	Q12175	1.00294	0.919852	18	12	0.00423467
Prefoldin subunit 5	Q04493	1.00284	0.888779	3	2	0.00409105
SWR1-complex protein 5	P38326	1.00281	0.816452	9	6	0.00404309
Putative uncharacterized protein YHR070C-A	A0A023PYH0	1.00262	0.930335	1	1	0.00377104
ATP-dependent DNA helicase CHL1	P22516	1.00259	0.960909	11	11	0.00372768
Good for full DBP5 activity protein 2	P25370	1.00248	0.913782	8	5	0.0035738
Histone-lysine N-methyltransferase, H3 lysine-36 specific	P46995	1.00242	0.76525	22	20	0.00348472
Mitochondrial import receptor subunit TOM20	P35180	1.0024	0.959797	6	2	0.00346191
Spindle pole body-associated protein CIK1	Q01649	1.0023	0.969393	10	10	0.00331462
Altered inheritance of mitochondria protein 21	P40563	1.00219	0.948163	13	13	0.00315384
Guanine nucleotide exchange factor LTE1	P07866	1.00214	0.844005	22	21	0.00307708
Fork head protein homolog 1	P40466	1.00204	0.980973	3	3	0.00294708
56 kDa U1 small nuclear ribonucleoprotein component	Q03782	1.00194	0.959463	8	8	0.00279669
Potential protein lysine methyltransferase SET6	Q12529	1.0019	0.984668	1	1	0.00273782
Probable NADPH:adrenodoxin oxidoreductase, mitochondrial	P48360	1.00178	0.95097	17	12	0.00257274
Ferric/cupric reductase transmembrane component 2	P36033	1.00175	0.984995	2	2	0.00252118
ATP-dependent RNA helicase MSS116, mitochondrial	P15424	1.00157	0.966514	13	11	0.00226283
GTPase-activating protein GYP8	P43570	1.00156	0.919163	9	9	0.00224484
U3 small nucleolar RNA-associated protein 22	P53254	1.00151	0.964536	12	8	0.00217952
Aspartate aminotransferase, mitochondrial	Q01802	1.00146	0.982975	5	4	0.00210143
Cystathionine beta-synthase	P32582	1.00142	0.985554	8	1	0.00204293
Actin cytoskeleton-regulatory complex protein PAN1	P32521	1.00135	0.987423	11	10	0.00194832
Oxidant-induced cell-cycle arrest protein 5	P38738	1.00133	0.987549	8	7	0.00191269
DNA repair/transcription protein MET18/MMS19	P40469	1.00123	0.958114	9	8	0.00177123
Mediator of RNA polymerase II transcription subunit 12	P25648	1.00115	0.949063	16	14	0.00166065
Glycerol 2-dehydrogenase (NADP(+))	P14065	1.00115	0.981223	5	5	0.00165426
Uncharacterized protein YGR017W	P53210	1.00103	0.982088	8	7	0.00148953
Vacuolar protein sorting-associated protein 70	P47161	1.00102	0.981077	7	7	0.00146839
Checkpoint serine/threonine-protein kinase BUB1	P41695	1.001	0.993996	8	5	0.00144398
Acetyl-CoA carboxylase, mitochondrial	P32874	1.00094	0.979272	53	43	0.00135724
Protein ARG5,6, mitochondrial	Q01217	1.00084	0.985148	28	24	0.00121582
Chromatin structure-remodeling complex subunit RSC2	Q06488	1.00084	0.991726	3	3	0.00120439
Putative mitochondrial carrier protein PET8	P38921	1.00076	0.981398	2	2	0.00109493
Eukaryotic translation initiation factor 3 subunit A	P38249	1.00074	0.96131	159	140	0.00106577
Imidazole glycerol phosphate synthase hisHF	P33734	1.00069	0.991164	3	3	0.000992257
[truncated: 1,815 more rows]

## Sheet: Insoluble
Database: SwissProt.Saccharomyces.cerevisiae		Fold-change relative to WT (3 biological replicates)	p < 0.05
entry_name	accession_number	SUA5_FC	T-test	TotPep	UniPep	log2FC
LAS seventeen-binding protein 1 LSB1/YGR136W	P53281	2.75884	0.377545	14	4	1.46406
Uncharacterized protein YJR012C	P47087	2.47897	0.424492	1	1	1.30974
Regulator of rDNA transcription protein 14	P40470	1.92776	0.416753	6	4	0.946924
Negative cofactor 2 complex subunit beta NCB2/YDR397C	Q92317	1.82747	0.0361726	1	1	0.869851
Uncharacterized ABC transporter ATP-binding protein/permease YOL075C	Q08234	1.68092	0.311451	46	9	0.749252
Uncharacterized protein YGL235W	P53071	1.67876	0.461865	3	3	0.747396
Protein YIP4	P53093	1.62078	0.109877	2	2	0.696686
2-isopropylmalate synthase	P06208	1.55034	0.00834466	2	2	0.632582
Putative uncharacterized protein YGL188C	P53098	1.53443	0.0253813	2	1	0.617701
DNA-directed RNA polymerase II subunit RPB9	P27999	1.53156	0.0522919	3	3	0.614997
Histone H2A.2	P04912	1.53045	0.0311545	2	2	0.613952
Aminodeoxychorismate lyase	Q03266	1.5261	0.48593	5	4	0.609853
Dolichyl-phosphate-mannose--protein mannosyltransferase 4	P46971	1.51107	0.301877	67	10	0.595573
Uncharacterized protein YFL065C	P43539	1.48007	0.0421938	1	1	0.56567
Uncharacterized protein YCR100C	P25606	1.46478	0.133028	1	1	0.550686
Putative uncharacterized protein YEL032C-A	Q8TGP4	1.46259	0.0526148	1	1	0.548523
Peroxiredoxin type-2	P38013	1.46127	0.00128665	59	7	0.547221
Putative uncharacterized protein YBR174C	P38294	1.42673	0.581777	1	1	0.512714
Putative uncharacterized protein YAL037C-A	Q3E741	1.41602	0.00898915	2	1	0.501839
Putative uncharacterized protein YDL023C	Q12264	1.41577	0.0700216	1	1	0.501585
Regulator of calcineurin 2	Q12044	1.41296	0.0122632	2	2	0.498716
Histone H2B.1	P02293	1.41039	0.00160572	5	4	0.496097
Putative uncharacterized protein YCL042W	P25572	1.3992	0.0178185	2	2	0.484606
Putative uncharacterized protein YJR087W	P47132	1.39447	0.0684563	3	2	0.47972
6-phosphogluconolactonase-like protein 2	P37262	1.3923	0.0518052	1	1	0.477468
[PIN+] prion protein RNQ1	P25367	1.38714	0.0723458	5	1	0.472117
Uncharacterized protein YER152C	P10356	1.37647	0.0128493	2	2	0.46097
Cytochrome b-c1 complex subunit 7	P00128	1.37609	0.138751	1	1	0.46057
Putative uncharacterized protein Q0142, mitochondrial	Q9ZZW4	1.37223	0.148138	1	1	0.45652
Carbamoyl-phosphate synthase arginine-specific large chain	P03965	1.35402	0.00407644	136	10	0.437245
Glyoxylate reductase 1	P53839	1.3537	0.00413459	2	2	0.436909
PAB1-binding protein 2	P38151	1.33037	0.106343	10	3	0.411822
Putative uncharacterized protein YOR335W-A	Q8TGL1	1.32729	0.352791	1	1	0.408482
Putative uncharacterized protein YLR217W	O13532	1.31383	0.219382	2	1	0.393782
Inorganic phosphate transport protein PHO88	P38264	1.31335	0.00940479	12	1	0.393253
Ribosome biogenesis protein MAK21	Q12176	1.31327	0.293899	66	18	0.393164
6,7-dimethyl-8-ribityllumazine synthase	P50861	1.31189	0.0865215	4	3	0.391644
Ribose-phosphate pyrophosphokinase 5	Q12265	1.30709	0.439019	1	1	0.386356
Kinesin-like protein KIP2	P28743	1.30646	0.429729	34	9	0.385667
Carnitine O-acetyltransferase, mitochondrial	P32796	1.30295	0.00620899	29	10	0.381786
Serine palmitoyltransferase-regulating protein TSC3	Q3E790	1.29989	0.0978985	1	1	0.378394
60S ribosomal protein L38	P49167	1.29977	0.029691	8	1	0.378254
Deoxyhypusine synthase	P38791	1.29884	0.019609	6	4	0.377225
ADP-ribosylation factor-like protein 1	P38116	1.29806	0.345026	2	2	0.376357
Putative uncharacterized protein YJL215C	P40895	1.2927	0.0157358	4	2	0.370386
Ubiquitin-conjugating enzyme E2 6	P33296	1.29078	0.398048	4	3	0.368242
Putative uncharacterized protein YOR024W	Q12070	1.28886	0.0392693	2	2	0.366096
Protein CCC1	P47818	1.2887	0.134784	1	1	0.36592
DASH complex subunit DAM1	P53267	1.28737	0.100794	6	4	0.364428
60S ribosomal protein L15-A	P05748	1.28107	0.0287443	29	5	0.357349
DNA-directed RNA polymerase II subunit RPB4	P20433	1.27985	0.826725	1	1	0.355969
GTP-binding protein CIN4	P39110	1.27929	0.0416346	8	5	0.355346
Mitochondrial distribution and morphology protein 31	P38880	1.27925	0.0311707	5	4	0.355303
Uncharacterized membrane protein YDL218W	Q07629	1.27763	0.0392813	1	1	0.353472
Vacuolar protein sorting-associated protein VTA1	Q06263	1.27714	0.0119424	4	3	0.352913
Putative uncharacterized protein YPR059C	P0C5E1	1.2755	0.359875	1	1	0.351059
Profilin	P07274	1.27011	0.0732615	3	1	0.344953
Syntaxin-8	P31377	1.26972	0.125914	2	2	0.344509
Dolichyl-phosphate-mannose--protein mannosyltransferase 1	P33775	1.26468	0.0663078	15	2	0.338773
Putative uncharacterized protein YGL109W	P53138	1.2645	0.144718	2	2	0.338567
Broad-range acid phosphatase DET1	Q99288	1.25905	0.284177	33	11	0.332337
Uncharacterized vacuolar membrane protein YNR061C	P53747	1.25737	0.291061	3	3	0.330408
Histone H2A.1	P04911	1.25736	0.0241291	4	4	0.330397
DNA repair protein RAD34	Q06665	1.25531	0.339663	34	13	0.328045
Putative uncharacterized protein YLR279W	O13540	1.25503	0.319833	3	2	0.327721
Karyogamy protein KAR4	P25583	1.25462	0.4279	6	3	0.327249
Putative uncharacterized protein YNL285W	P53831	1.24961	0.311418	1	1	0.321481
Ketol-acid reductoisomerase, mitochondrial	P06168	1.24933	0.0049874	100	7	0.321149
Thioredoxin reductase 2, mitochondrial	P38816	1.24296	0.436346	7	5	0.313782
Cytochrome c oxidase assembly factor 3, mitochondrial	Q3E7B2	1.24207	0.0282156	5	3	0.312745
Mitochondrial biogenesis regulation protein 1	P23493	1.24161	0.34746	1	1	0.312211
APC/C activator protein CDH1	P53197	1.2409	0.0209739	17	6	0.311389
Serine/threonine-protein kinase KIN82	P25341	1.23838	0.449057	65	14	0.308451
Putative uncharacterized protein YOL166C	Q08373	1.23759	0.271943	1	1	0.307538
Plasma membrane ATPase 1	P05030	1.23583	0.00279312	101	18	0.305482
60S ribosomal protein L42-A	P0CX27	1.23413	0.0266412	5	4	0.303498
Putative uncharacterized protein YNL067W-A	P0C5Q8	1.23106	0.0475747	2	2	0.299902
Bypass of stop codon protein 6	Q08280	1.22983	0.0229048	33	3	0.298464
Carbonic anhydrase	P53615	1.22954	0.112842	8	1	0.298116
Mitochondrial inner membrane protein SHH4	Q06236	1.22939	0.121649	9	2	0.297938
Ribonuclease P/MRP protein subunit POP5	P28005	1.22891	0.0219842	10	6	0.297378
Homocysteine/cysteine synthase	P06106	1.22858	0.0162794	41	3	0.296998
Transcription factor tau 60 kDa subunit	Q12308	1.22826	0.0687274	22	6	0.296611
Serine palmitoyltransferase 1	P25045	1.22772	0.0535754	8	4	0.295985
Uncharacterized protein YER085C	P40058	1.22594	0.0575505	5	3	0.293888
Glycolytic genes transcriptional activator GCR2	Q01722	1.22527	0.0238778	11	5	0.293094
pH-response regulator protein palI/RIM9	Q04734	1.22453	0.0136727	3	1	0.292225
Spindle pole body-associated protein VIK1	Q12045	1.2236	0.525678	17	12	0.291136
Putative uncharacterized protein YEL008C-A	Q8TGP3	1.22301	0.149054	1	1	0.290441
60S ribosomal protein L24-B	P24000	1.22256	0.00184134	7	6	0.289903
Probable 26S proteasome regulatory subunit p28	P50086	1.22129	0.0500396	3	2	0.288402
Putative uncharacterized membrane protein YFL015W-A	A0A023PXD9	1.22099	0.130351	5	3	0.288046
60S ribosomal protein L14-A	P36105	1.21959	0.0268008	28	6	0.286391
Uncharacterized vacuolar membrane protein YML018C	Q03730	1.21712	0.130221	4	1	0.283473
Translocation protein SEC72	P39742	1.21639	0.0380778	9	4	0.28261
Putative uncharacterized protein YOR248W	Q08681	1.2162	0.402661	1	1	0.282386
Putative uncharacterized protein YLR402W	Q06057	1.21573	0.209345	3	1	0.281821
Putative uncharacterized protein YDR015C	Q12195	1.2149	0.0139875	2	1	0.280836
Ubiquitin-conjugating enzyme E2 1	P21734	1.21465	0.0409651	9	4	0.280538
Nicotinamide riboside transporter 1	Q08485	1.21146	0.101931	25	5	0.276744
Uncharacterized protein YPR160C-A	Q8TGK8	1.21144	0.0158573	4	2	0.276725
60S ribosomal protein L9-A	P05738	1.21076	0.0931025	7	7	0.275911
Zinc finger protein RTS2	P40962	1.21045	0.163832	70	9	0.275546
Putative uncharacterized protein YIL032C	P40536	1.20956	0.142425	3	2	0.274488
Protein transport protein SBH1	P52870	1.20875	0.220265	1	1	0.273511
Serine/threonine-protein phosphatase 2A activator 1	P40454	1.20829	0.156827	1	1	0.272962
Monothiol glutaredoxin-5, mitochondrial	Q02784	1.20821	0.00608291	12	2	0.272867
Ubiquitin carboxyl-terminal hydrolase 4	P32571	1.20742	0.363783	41	15	0.271925
Transcriptional regulatory protein GAT1	P43574	1.20682	0.347836	2	2	0.271214
54S ribosomal protein L40, mitochondrial	P36534	1.20682	0.0308511	30	9	0.271211
Hexose transporter HXT10	P43581	1.20636	0.0461865	19	3	0.270666
Putative uncharacterized protein YOR309C	Q12444	1.20596	0.0564226	2	2	0.270181
40S ribosomal protein S1-A	P33442	1.20578	0.012247	15	11	0.269962
Uncharacterized protein YEL067C	P39978	1.20573	0.19228	1	1	0.269912
Vacuolar morphogenesis protein 7	P32912	1.20515	0.0859327	48	5	0.269209
54S ribosomal protein L7, mitochondrial	P36519	1.20327	0.0402438	5	4	0.266964
60S ribosomal protein L35-A	P0CX84	1.20277	0.122732	14	3	0.266364
Cytochrome P450 61	P54781	1.19857	0.0421625	43	7	0.261312
1-phosphatidylinositol 4,5-bisphosphate phosphodiesterase 1	P32383	1.196	0.0668626	49	15	0.258218
MIOREX complex component 7	P53869	1.19556	0.253742	4	3	0.257691
Presequence translocated-associated motor subunit PAM17, mitochondrial	P36147	1.19436	0.0659905	9	2	0.256234
Dihydrofolate reductase	P07807	1.19264	0.0101086	41	6	0.254164
Signal recognition particle subunit SRP21	P32342	1.19247	0.202985	1	1	0.253948
40S ribosomal protein S15	Q01855	1.19226	0.00230433	15	3	0.253696
7-keto 8-aminopelargonic acid transporter	P53744	1.19173	0.0739474	19	4	0.253052
Putative uncharacterized protein YLR365W	Q7LIF2	1.19041	0.072563	1	1	0.251455
Niemann-Pick type C-related protein 1	Q12200	1.19002	0.0152331	24	6	0.250991
Polyprenol reductase	P40526	1.18974	0.246866	3	2	0.250643
Eukaryotic peptide chain release factor subunit 1	P12385	1.18965	0.223556	41	1	0.250541
Putative uncharacterized protein ART3	Q8TGM5	1.1882	0.18067	2	1	0.248783
Uncharacterized oxidoreductase YIR035C	P40579	1.18788	0.389371	1	1	0.24839
ER lumen protein-retaining receptor	P18414	1.1878	0.225199	5	3	0.248288
tRNA:m(4)X modification enzyme TRM13	Q12383	1.1873	0.129182	24	6	0.247684
Uncharacterized protein YKR070W	P36151	1.18633	0.0268135	6	3	0.246502
Non-structural maintenance of chromosome element 3	Q05541	1.18625	0.27568	13	4	0.246411
Putative pterin-4-alpha-carbinolamine dehydratase	P38744	1.18606	0.118247	3	3	0.246177
UPF0357 protein YCL012C	Q8J0M4	1.18463	0.012061	11	5	0.244433
54S ribosomal protein L28, mitochondrial	P36527	1.18456	0.00709128	7	4	0.244346
Putative uncharacterized protein YGR039W	P53225	1.18443	0.0712157	2	1	0.244192
Ribonuclease MRP protein subunit RMP1	Q12530	1.18441	0.054429	3	2	0.244173
Protein SPT3	P06844	1.18364	0.0471238	13	4	0.243226
Protein HMF1	P40037	1.18175	0.0559549	4	3	0.24092
V-type ATPase assembly factor PKR1	Q03880	1.1791	0.0433005	9	4	0.237684
Serine/threonine-protein kinase PTK1/STK1	P36002	1.17909	0.22054	40	1	0.23767
Uncharacterized protein YGR117C	P53270	1.17787	0.520922	4	3	0.23618
37S ribosomal protein S26, mitochondrial	P47141	1.1778	0.0236978	14	4	0.236099
Nuclear distribution protein PAC1	P39946	1.17766	0.120797	19	8	0.235923
Uncharacterized deoxyribonuclease YMR262W	P38430	1.17727	0.013484	17	5	0.235449
Putative uncharacterized protein YLR252W	O13573	1.17718	0.202283	1	1	0.235337
G2/mitotic-specific cyclin-1	P24868	1.17696	0.26398	5	4	0.235067
Thymidylate synthase	P06785	1.17598	0.0300446	13	7	0.233867
Protein ERP6	P53198	1.17504	0.011489	1	1	0.232711
40S ribosomal protein S3	P05750	1.17483	0.0549084	32	9	0.232457
Ribosomal lysine N-methyltransferase 2	Q03942	1.17471	0.122202	2	2	0.232308
Dolichyldiphosphatase	P53223	1.17411	0.0515613	13	5	0.231566
Uncharacterized membrane protein YHL071W	P38745	1.17393	0.109688	7	4	0.231352
NADPH--cytochrome P450 reductase	P16603	1.17376	0.00192756	38	9	0.231135
Mitochondrial carrier protein LEU5	P38702	1.17367	0.485139	21	7	0.231026
Putative sulfate transporter YPR003C	P53394	1.17323	0.390803	3	3	0.230489
Translation initiation factor eIF-2B subunit gamma	P09032	1.1726	0.197173	31	7	0.229711
Putative uncharacterized protein YHR182C-A	A0A023PZI9	1.17238	0.147905	2	1	0.229434
60S ribosomal protein L11-A	P0C0W9	1.17229	0.048889	6	5	0.229331
E3 ubiquitin-protein ligase DMA2	P53924	1.17221	0.121364	78	4	0.22923
T-complex protein 1 subunit gamma	P39077	1.17177	0.280147	11	1	0.22869
ABC transporter ATP-binding protein ARB1	P40024	1.17169	0.0209517	6	1	0.228588
Putative uncharacterized protein YOL085C	Q99345	1.17042	0.259746	2	1	0.22703
Proteasome subunit beta type-5	P30656	1.1691	0.0911375	2	1	0.225397
Reticulon-like protein 1	Q04947	1.16901	0.0353406	10	5	0.225293
Activatory protein CHA4	P43634	1.16896	0.0352256	46	4	0.225224
Cell membrane protein YLR413W	Q06689	1.16864	0.0491531	3	2	0.22483
Fatty acid synthase subunit alpha	P19097	1.16734	0.00476355	88	5	0.22322
DASH complex subunit DUO1	P53168	1.16726	0.20059	2	2	0.223124
Uncharacterized vacuolar membrane protein YGR125W	P53273	1.16678	0.0815588	7	2	0.222534
SUR7 family protein FMP45	Q07651	1.16589	0.0385435	3	2	0.221427
40S ribosomal protein S18-A	P0CX55	1.16479	0.0342035	27	4	0.220068
Transposon Ty1-DR6 Gag-Pol polyprotein	P0C2I3	1.16383	0.0598524	9	5	0.218878
Putative uncharacterized membrane protein YER107W-A	A0A023PXJ7	1.16357	0.0821639	3	1	0.218556
ATP-dependent 6-phosphofructokinase subunit beta	P16862	1.16174	0.0125072	46	9	0.216293
EST/SMG-like protein 1	P40456	1.16157	0.443116	93	26	0.216082
40S ribosomal protein S1-B	P23248	1.16089	0.0920001	90	11	0.215235
40S ribosomal protein S2	P25443	1.16042	0.0579829	33	9	0.214641
Putative uncharacterized protein YLR428C	O13564	1.16041	0.0461105	4	2	0.214632
Chromatin modification-related protein YNG2	P38806	1.15874	0.0452683	7	4	0.212554
Cytochrome oxidase assembly protein SHY1	P53266	1.15856	0.383524	1	1	0.212337
60S ribosomal protein L10	P41805	1.15695	0.00627588	52	8	0.210328
Putative uncharacterized protein YBR144C	P34215	1.15667	0.086555	3	2	0.209982
Mitochondrial import inner membrane translocase subunit TIM21	P53220	1.1559	0.0400567	2	1	0.209015
Putative uncharacterized membrane protein YHR069C-A	A0A023PZI4	1.15559	0.186628	2	1	0.208624
Metacaspase-1	Q08601	1.15532	0.0257803	5	3	0.208295
Protein FMP49, mitochondrial	A0A023PZB3	1.15498	0.0170294	3	3	0.207866
Mediator of RNA polymerase II transcription subunit 8	P38304	1.15484	0.260701	19	3	0.207689
Phosphatidate phosphatase APP1	P53933	1.15483	0.167432	6	5	0.207678
Sphingolipid long chain base-responsive protein LSP1	Q12230	1.15482	0.0222301	20	2	0.207672
Actin-like protein ARP6	Q12509	1.15482	0.0535162	7	3	0.207663
Protein PRY2	P36110	1.15473	0.302258	4	2	0.207556
Putative uncharacterized protein YOR379C	Q08903	1.15387	0.0224344	25	6	0.206485
Elongation of fatty acids protein 3	P40319	1.15366	0.331196	2	2	0.206223
Putative uncharacterized protein YKL053W	P35733	1.1536	0.0407599	7	3	0.206146
Alpha-mannosidase	P22855	1.15323	0.0650286	70	18	0.205675
NADPH-dependent 1-acyldihydroxyacetone phosphate reductase	P40471	1.15286	0.0777966	4	2	0.205221
Cytochrome b translational activator protein CBS1, mitochondrial	P14066	1.15274	0.36715	8	4	0.205068
FK506-binding protein 4	Q06205	1.15197	0.306536	4	2	0.204099
Outer spore wall protein 6	P47056	1.15195	0.167238	3	2	0.204074
Putative uncharacterized protein YLR255C	O13574	1.15063	0.130819	51	3	0.202426
40S ribosomal protein S7-A	P26786	1.15042	0.00403245	47	7	0.20216
E3 ubiquitin-protein ligase DMA1	P38823	1.15029	0.075371	75	4	0.202001
Serine/threonine-protein kinase RCK1	P38622	1.15019	0.0499529	10	6	0.201878
Protein AFG1	P32317	1.14952	0.131614	11	5	0.201032
Calcium permeable stress-gated cation channel 1	Q06538	1.14924	0.00992064	13	6	0.200675
Nucleoside transporter FUN26	P31381	1.1492	0.289526	12	5	0.200629
Exosome complex component RRP4	P38792	1.14913	0.153201	3	3	0.20054
Putative uncharacterized protein YOR050C	Q08419	1.14885	0.235012	1	1	0.200186
Putative uncharacterized protein YLR112W	Q12130	1.14876	0.456667	3	1	0.200076
Golgi apparatus membrane protein TVP18	Q04767	1.1485	0.0711425	2	1	0.199755
Protein YSY6	P38374	1.14794	0.315158	1	1	0.199049
F-box protein YLR224W	Q05947	1.14786	0.0608964	3	3	0.198947
Regulator of V-ATPase in vacuolar membrane protein 2	Q03956	1.14773	0.375137	6	2	0.198781
Heat shock protein SSC1, mitochondrial	P0CS90	1.14653	0.0331602	34	8	0.197271
40S ribosomal protein S14-A	P06367	1.14648	0.0549498	17	4	0.19721
Probable phosphatase PSR2	Q07949	1.14647	0.0195347	3	2	0.197196
Bax inhibitor 1	P48558	1.14635	0.00805527	16	2	0.197049
FIT family protein YFT2	Q06676	1.1458	0.0943472	8	3	0.196351
Prohibitin-2	P50085	1.14573	0.0491518	7	2	0.196266
DnaJ homolog 1, mitochondrial	P35191	1.14529	0.17873	14	7	0.195716
3,2-trans-enoyl-CoA isomerase	Q05871	1.14527	0.0384855	38	7	0.195686
Putative transposon Ty5-1 protein YCL074W	P25600	1.1452	0.0899563	18	3	0.195598
Asparagine synthetase [glutamine-hydrolyzing] 1	P49089	1.1447	0.00330428	51	4	0.194974
MIOREX complex component 1	P40050	1.144	0.193144	37	15	0.194089
Protein ERP1	Q05359	1.14328	0.0524721	33	3	0.193179
Non-classical export protein 2 homolog 1	P53279	1.14291	0.350398	3	1	0.192717
Autophagy-related protein 36	P46983	1.14257	0.206708	8	2	0.192284
Glycerol uptake/efflux facilitator protein	P23900	1.1423	0.234467	10	2	0.191942
Putative uncharacterized protein YBR013C	P38215	1.14198	0.325741	3	1	0.19154
Aquaporin-1	P0CD91	1.14149	0.0460228	7	2	0.190919
Tryptophan--tRNA ligase, cytoplasmic	Q12109	1.14142	0.00321437	20	8	0.190834
60S ribosomal protein L3	P14126	1.14119	0.0367966	97	14	0.190541
Probable zinc transporter MSC2	Q03455	1.14097	0.0151024	16	5	0.190264
Condensin complex subunit 3	Q06680	1.14096	0.0393167	11	1	0.190251
40S ribosomal protein S4-A	P0CX35	1.14084	0.0430494	78	13	0.190101
Vacuolar morphogenesis protein 6	Q07468	1.1399	0.067675	63	18	0.188902
SWI/SNF chromatin-remodeling complex subunit SNF5	P18480	1.13984	0.0410774	22	5	0.188829
Transcription activator of gluconeogenesis ERT1	P38140	1.13938	0.346923	6	4	0.188248
Uncharacterized protein YNL193W	P53870	1.13896	0.0286037	38	10	0.187719
Uncharacterized protein YFR020W	P43600	1.13855	0.175732	11	2	0.187197
Uncharacterized protein YMR265C	Q03508	1.13851	0.108306	18	6	0.187144
Lipase 5	Q12043	1.13847	0.0736707	20	6	0.1871
60S ribosomal protein L26-A	P05743	1.13841	0.00689979	57	7	0.187025
Elongator complex protein 6	Q04868	1.13816	0.1995	4	3	0.186707
Phosphomevalonate kinase	P24521	1.13814	0.645708	24	11	0.186682
Uncharacterized protein YMR111C	Q04461	1.13805	0.0804124	23	10	0.186564
Putative uncharacterized protein YMR193C-A	Q6B0R2	1.13768	0.393328	6	4	0.186089
Cytosolic Fe-S cluster assembly factor NAR1	P23503	1.1375	0.234876	58	2	0.185865
Uncharacterized protein YOR238W	Q08634	1.13699	0.0555647	44	7	0.185219
Cop9 signalosome complex subunit 12	P47130	1.1366	0.0962703	42	7	0.184724
SEC14 cytosolic factor	P24280	1.13634	0.0711036	76	5	0.184398
Glucan 1,3-beta-glucosidase 2	P52911	1.13626	0.0571709	9	7	0.184292
Uridine kinase	P27515	1.13534	0.396156	7	6	0.183129
Spindle pole body component SPC105	P53148	1.13471	0.0170843	64	14	0.182326
Nucleolar complex protein 4	Q06512	1.13465	0.00590791	11	8	0.182252
Putative uncharacterized protein YKR104W	P0CE69	1.13388	0.06843	30	6	0.181262
Long-chain-fatty-acid--CoA ligase 4	P47912	1.13379	0.0675353	14	6	0.181153
U6 snRNA-associated Sm-like protein LSm7	P53905	1.13332	0.120041	8	3	0.180556
Transcriptional regulatory protein PHO23	P50947	1.13294	0.329266	2	2	0.180067
UDP-N-acetylglucosamine--dolichyl-phosphate N-acetylglucosaminephosphotransferase	P07286	1.13252	0.291828	6	5	0.179534
DBF2 kinase activator protein MOB1	P40484	1.13235	0.281318	5	2	0.179321
T-SNARE affecting a late Golgi compartment protein 1	Q03322	1.13194	0.00866162	2	2	0.178791
Serine/threonine-protein kinase MPS1	P54199	1.1319	0.2256	15	8	0.178747
Galactokinase	P04385	1.1318	0.00907058	31	7	0.178625
Protein SAP1	P39955	1.13126	0.573467	19	9	0.177931
ADIPOR-like receptor IZH1	Q03419	1.13117	0.0233828	17	3	0.177812
m7GpppN-mRNA hydrolase	P53550	1.13082	0.00779078	17	8	0.177367
Pheromone alpha factor receptor	D6VTK4	1.1299	0.0779036	8	4	0.176197
Probable 1,3-beta-glucanosyltransferase GAS3	Q03655	1.12977	0.0570948	1	1	0.176025
Transcription initiation factor TFIID subunit 13	P11747	1.12974	0.275468	2	2	0.175991
DASH complex subunit DAD1	Q12248	1.12959	0.248115	15	2	0.175798
Arginine permease	P04817	1.12926	0.0518148	14	5	0.175381
20S-pre-rRNA D-site endonuclease NOB1	Q08444	1.1292	0.233104	26	10	0.175303
Mitochondrial distribution and morphology protein 12	Q92328	1.12905	0.200041	4	1	0.175113
Uncharacterized protein YJR112W-A	Q3E743	1.12876	0.076954	1	1	0.174733
Polyadenylation factor subunit 2	P42841	1.12864	0.0998896	28	5	0.174585
Uncharacterized vacuolar protein YLR297W	Q05899	1.12845	0.112419	5	3	0.174336
60S ribosomal protein L32	P38061	1.12843	0.00582183	31	5	0.174314
T-complex protein 1 subunit delta	P39078	1.1283	0.421052	8	7	0.174155
V-type proton ATPase subunit H	P41807	1.12828	0.00500161	21	2	0.174123
Putative increased recombination centers protein 13	Q08630	1.12795	0.188207	6	2	0.173698
Homeobox protein CUP9	P41817	1.12781	0.0457926	7	2	0.17352
Benzil reductase ((S)-benzoin forming) IRC24	P40580	1.1276	0.425046	3	3	0.173262
Glycerol-3-phosphate O-acyltransferase 1	P32784	1.12744	0.00522473	10	7	0.173054
25S rRNA (cytosine(2870)-C(5))-methyltransferase	P40991	1.12717	0.0588728	24	10	0.172708
60S ribosomal protein L7-A	P05737	1.12702	0.025531	40	14	0.172511
Protein PUN1	Q06991	1.12647	0.288849	10	1	0.171814
ATP phosphoribosyltransferase	P00498	1.12639	0.0902211	8	3	0.171707
Cytochrome c oxidase assembly protein COX16, mitochondrial	P47081	1.12631	0.144232	7	3	0.171605
60S ribosomal protein L33-A	P05744	1.12581	0.04615	43	4	0.170958
Altered inheritance of mitochondria protein 19, mitochondrial	P40502	1.12559	0.14114	2	1	0.170684
Uncharacterized abhydrolase domain-containing protein YGR015C	P53208	1.12544	0.0149307	6	4	0.170487
E3 ubiquitin-protein ligase PIB1	Q06651	1.12537	0.185875	69	4	0.170405
40S ribosomal protein S8-A	P0CX39	1.12529	0.0632937	13	4	0.170291
Uroporphyrinogen decarboxylase	P32347	1.12502	0.0335634	28	7	0.169956
Putative uncharacterized protein YBR206W	P38309	1.12481	0.326203	2	2	0.169683
Adaptin medium chain homolog APM2	P38700	1.12413	0.0283519	37	15	0.168814
Putative uncharacterized protein YDL032w	Q12281	1.12388	0.0730068	1	1	0.168482
Uridine nucleosidase	Q04179	1.12373	0.175981	9	4	0.168299
54S ribosomal protein L9, mitochondrial	P31334	1.12372	0.0343046	46	1	0.168288
Flavin carrier protein 2	P39719	1.12371	0.0449779	25	9	0.16827
37S ribosomal protein MRP13, mitochondrial	P12686	1.1237	0.463921	12	5	0.168256
Mannosyl phosphorylinositol ceramide synthase SUR1	P33300	1.1236	0.0146793	32	6	0.168133
Cytochrome b2, mitochondrial	P00175	1.12351	0.214483	8	6	0.168018
Meiotic activator RIM4	P38741	1.12327	0.0278951	19	6	0.167699
Heterogeneous nuclear rnp K-like protein 2	P38199	1.12288	0.181855	30	6	0.167199
60S ribosomal protein L19-A	P0CX82	1.12276	0.0278617	73	7	0.167049
Zinc finger protein STP3	Q05937	1.12255	0.0832433	40	5	0.166778
DNA polymerase epsilon subunit C	P27344	1.12248	0.000945511	8	2	0.166689
Suppressor of HU sensitivity involved in recombination protein 1	P38751	1.12238	0.552247	3	1	0.166561
Uncharacterized protein YIL060W	P25561	1.12215	0.464341	19	2	0.166262
Putative uncharacterized protein YOR225W	Q12225	1.1219	0.336346	5	2	0.165949
Uncharacterized protein YER121W	P40076	1.12186	0.178329	15	3	0.165893
Putative ATP-dependent RNA helicase YLR419W	Q06698	1.12179	0.252419	97	29	0.165807
Protein PLM2	Q04383	1.12162	0.205641	42	11	0.165581
Myo-inositol transporter 2	P30606	1.12119	0.00503521	19	5	0.16503
Glutathione-independent glyoxalase HSP31	Q04432	1.12115	0.0205972	51	3	0.164979
40S ribosomal protein S19-A	P07280	1.12112	0.276317	23	6	0.164939
Regulator of G-protein signaling 2	Q99188	1.12107	0.174795	16	7	0.164877
Putative uncharacterized membrane protein YLR458W	A0A023PZK9	1.12091	0.473162	1	1	0.164676
Serine/threonine-protein kinase STE11	P23561	1.1206	0.119102	15	7	0.16427
Serine/threonine-protein kinase ATG1	P53104	1.11976	0.240782	25	10	0.163188
Aspartokinase	P10869	1.11966	0.0150789	11	7	0.163057
Protein SCO1, mitochondrial	P23833	1.11965	0.15665	16	4	0.163051
N-acetylglucosaminyl-phosphatidylinositol de-N-acetylase	P23797	1.11957	0.00156843	8	2	0.162941
Calnexin homolog	P27825	1.1193	0.000735793	9	4	0.162595
Actin-regulating kinase 1	P53974	1.11853	0.0123391	24	3	0.16161
40S ribosomal protein S9-A	O13516	1.11837	0.093536	41	8	0.161393
Pre-mRNA-splicing factor SNT309	Q06091	1.11819	0.276068	4	3	0.161166
Putative uncharacterized protein YKR032W	P36127	1.11793	0.593395	2	1	0.160834
Bud site selection protein 27	P43573	1.11791	0.11809	18	11	0.160808
60S ribosomal protein L20-A	P0CX23	1.11765	0.0974529	64	5	0.160474
Pre-mRNA polyadenylation factor FIP1	P45976	1.11763	0.392966	6	3	0.160445
ARF3-interacting protein 1	Q99222	1.11749	0.0239347	33	10	0.160263
1,3-beta-glucanosyltransferase GAS1	P22146	1.11738	0.299093	27	3	0.160114
Uncharacterized protein YGL006W-A	Q3E802	1.11638	0.0588637	2	1	0.158834
Putative uncharacterized hydrolase YKL033W-A	Q86ZR7	1.11629	0.243565	2	2	0.158711
Ribose-phosphate pyrophosphokinase 1	P32895	1.11589	0.0969959	4	2	0.1582
Uncharacterized protein YGR169C-A	Q3E772	1.11579	0.105588	11	5	0.158066
RDS3 complex subunit 10	P0C074	1.11572	0.0265322	4	2	0.157978
Putative uncharacterized protein YAL066W	P39710	1.11554	0.0435113	6	2	0.157739
Required for respiratory growth protein 8, mitochondrial	Q06109	1.11541	0.149295	8	5	0.15757
Nucleoporin POM34	Q12445	1.11511	0.187443	18	4	0.157185
37S ribosomal protein S7, mitochondrial	P47150	1.11509	0.181064	13	5	0.157163
Serine/threonine-protein kinase SSK22	P25390	1.11496	0.104205	80	20	0.156989
Heat shock protein SSA2	P10592	1.1143	0.0437816	106	15	0.15614
Protein GRE1	Q08969	1.11424	0.1153	14	3	0.156061
Uncharacterized protein YER034W	P40022	1.1142	0.00323341	10	5	0.156002
Putative uncharacterized protein YJR128W	P47162	1.11406	0.335286	8	2	0.155833
Asparagine synthetase [glutamine-hydrolyzing] 2	P49090	1.11397	0.0750299	36	3	0.155714
Phosphatidylglycerophosphatase GEP4, mitochondrial	P38812	1.11387	0.392224	2	2	0.155579
Putative uncharacterized protein YGR045C	P53229	1.11386	0.157493	5	2	0.155569
General negative regulator of transcription subunit 3	P06102	1.11355	0.0282246	18	10	0.15517
Uncharacterized protein YBL059W	P34224	1.11335	0.0633151	5	3	0.15491
Dual specificity protein kinase YAK1	P14680	1.11316	0.00362999	91	11	0.154658
Putative uncharacterized protein YDR209C	Q03480	1.1127	0.124777	7	1	0.15406
Protein ECM7	Q06200	1.11243	0.344852	3	3	0.153709
Phosphatidylinositol N-acetylglucosaminyltransferase GPI3 subunit	P32363	1.11242	0.041396	8	6	0.153701
40S ribosomal protein S11-A	P0CX47	1.11234	0.000684058	35	8	0.153594
Cell morphogenesis protein PAG1	P40468	1.11233	0.0147047	181	5	0.15358
tRNA (guanine(26)-N(2))-dimethyltransferase, mitochondrial	P15565	1.11197	0.0532892	29	11	0.153114
78 kDa glucose-regulated protein homolog	P16474	1.11187	0.138838	59	8	0.152983
54S ribosomal protein L3, mitochondrial	P36516	1.11181	0.110341	13	9	0.152906
Probable ferric reductase transmembrane component 8	Q12209	1.11146	0.049837	32	11	0.152455
Peptidyl-prolyl cis-trans isomerase C, mitochondrial	P25719	1.11135	0.0102329	14	3	0.15231
tRNA A64-2'-O-ribosylphosphate transferase	P23796	1.11118	0.0402972	44	1	0.152088
Serine-rich protein TYE7	P33122	1.11094	0.103059	7	4	0.151776
Putative hexokinase YLR446W	Q06204	1.11078	0.0460879	21	9	0.151573
ABC transporter ATP-binding protein/permease VMR1	P38735	1.11052	0.0217427	72	18	0.151241
Lethal(2) giant larvae protein homolog SRO77	P38163	1.11038	0.131798	37	13	0.151048
DNA repair protein RAD2	P07276	1.11031	0.0085814	199	22	0.150964
Mitochondrial-processing peptidase subunit alpha	P11914	1.11025	0.187707	10	4	0.150881
Nucleoporin NUP85	P46673	1.11001	0.0569554	8	5	0.150578
Uncharacterized protein YDL022C-A	P0C5L6	1.10998	0.335552	2	2	0.150528
60S ribosomal protein L26-B	P53221	1.10992	0.040797	57	7	0.150452
Phosphoenolpyruvate carboxykinase [ATP]	P10963	1.10991	0.190218	10	4	0.150445
Peroxisomal membrane protein PEX29	Q03370	1.10985	0.1038	12	6	0.150362
Guanine nucleotide-exchange factor SEC12	P11655	1.1097	0.24194	66	1	0.150172
GTPase-activating protein SAC7	P17121	1.10967	0.058646	58	12	0.150126
Elongation factor 3B	P53978	1.10952	0.0177121	56	11	0.14994
Protein NSG2	P53898	1.10948	0.437387	2	2	0.149881
60S ribosomal protein L16-A	P26784	1.10936	0.0585306	36	8	0.14973
Ribosomal RNA-processing protein 7	P25368	1.1093	0.0304156	18	8	0.149654
U6 snRNA-associated Sm-like protein LSm8	P47093	1.10924	0.127881	10	4	0.149572
Fe-S cluster assembly protein DRE2	P36152	1.10922	0.0553357	4	2	0.149543
40S ribosomal protein S24-A	P0CX31	1.10876	0.104131	21	5	0.148944
Putative uncharacterized protein YLR232W	O13546	1.10872	0.0323222	13	1	0.148896
Uncharacterized protein YGR269W	P40326	1.10871	0.564257	5	3	0.148882
Cohesin subunit SCC3	P40541	1.10833	0.249073	58	14	0.148385
Putative uncharacterized protein YGR114C	P53268	1.10823	0.147236	2	1	0.148263
ATP-dependent kinase YFH7	P43591	1.10821	0.17808	17	5	0.148236
DNA-directed RNA polymerase I subunit RPA43	P46669	1.10812	0.266817	8	5	0.148116
Putative uncharacterized protein YDR278C	Q05612	1.10812	0.638792	2	2	0.148116
Putative uncharacterized membrane protein YML057C-A	P0C261	1.10804	0.523553	3	2	0.148006
Probable transcriptional regulator NRG2	P38082	1.10796	0.11331	36	10	0.147901
Putative uncharacterized protein YOR314W-A	P0C5R0	1.10786	0.0163944	94	3	0.147775
Mediator of RNA polymerase II transcription subunit 12	P25648	1.1077	0.284152	98	13	0.147569
Polyphosphoinositide phosphatase	P42837	1.10769	0.0784466	62	13	0.147558
HDA1 complex subunit 3	Q06623	1.10754	0.12817	64	11	0.147363
Putative uncharacterized protein YDR344C	Q05510	1.10751	0.371643	2	1	0.147318
60S ribosome subunit biogenesis protein NIP7	Q08962	1.10734	0.279545	2	2	0.147094
Inner nuclear membrane protein SRC1	Q03707	1.10725	0.136355	23	7	0.146987
Putative uncharacterized protein YPR126C	O13567	1.10669	0.174945	9	1	0.146246
Inositol phosphorylceramide synthase regulatory subunit KEI1	Q06346	1.10598	0.173694	2	2	0.14533
Putative uncharacterized oxidoreductase YGL039W	P53183	1.10588	0.398309	3	3	0.14519
Superoxide dismutase 1 copper chaperone	P40202	1.1058	0.061973	14	6	0.145097
UPF0743 protein YCR087C-A	P37263	1.10577	0.145688	23	4	0.145052
ADP-ribosylation factor 1	P11076	1.1055	0.0152412	21	1	0.144697
Putative uncharacterized protein YMR153C-A	A0A023PYJ4	1.1052	0.562453	1	1	0.144302
UBX domain-containing protein 3	Q12229	1.10455	0.107214	34	7	0.143454
NADPH-dependent aldose reductase GRE3	P38715	1.10454	0.0784508	16	1	0.143441
Covalently-linked cell wall protein 14	O13547	1.10451	0.45478	1	1	0.143407
Putative uncharacterized protein YCR102W-A	Q96VG5	1.10434	0.127103	2	1	0.143189
54S ribosomal protein L2, mitochondrial	P12687	1.10411	0.0220129	75	12	0.142884
Ectonucleotide pyrophosphatase/phosphodiesterase 2	P39997	1.10402	0.167594	81	10	0.14276
Non-disjunction protein 1	Q12366	1.10401	0.0312276	10	5	0.142757
GRASP65 homolog protein 1	Q04410	1.10341	0.154991	10	3	0.141973
Transcription factor VHR2	P40041	1.10339	0.0762016	15	4	0.141946
Mitochondrial inner membrane protease subunit 1	P28627	1.10328	0.0539698	15	3	0.141798
Uncharacterized transporter YBR287W	P38355	1.1032	0.0123501	7	2	0.141694
Putative uncharacterized protein YPR074W-A	P0C5R6	1.10318	0.0349829	11	4	0.14167
Uncharacterized protein YLR154C-G	Q3E813	1.10317	0.531215	2	2	0.141658
Transmembrane 9 superfamily member 2	Q04562	1.10309	0.154545	8	5	0.141551
FAD synthase	P38913	1.10294	0.193475	13	3	0.141361
40S ribosomal protein S13	P05756	1.1029	0.00474213	52	5	0.141302
Phosphatidylinositol N-acetylglucosaminyltransferase subunit GPI19	Q04082	1.10262	0.165473	1	1	0.14093
Saccharolysin	P25375	1.10249	0.102898	62	13	0.140769
Protein EAR1	Q03212	1.10233	0.208206	25	8	0.140551
SAGA-associated factor 73	P53165	1.1023	0.0187847	43	13	0.140518
60S ribosomal protein L21-A	Q02753	1.10223	0.0339825	41	8	0.140428
Protein FYV4, mitochondrial	P38783	1.10218	0.0266734	14	5	0.14036
Transcription factor CRF1	Q04930	1.10211	0.43429	4	2	0.140274
WD repeat-containing protein JIP5	Q06214	1.10198	0.353908	8	4	0.140104
Aprataxin-like protein	Q08702	1.10188	0.190854	113	17	0.139972
Putative carboxypeptidase YOL153C	P0C155	1.10183	0.649959	6	2	0.139897
Suppressor of yeast profilin deletion	P25623	1.10172	0.0338667	29	12	0.139759
Probable metalloreductase AIM14	P53109	1.10156	0.167215	107	10	0.139545
Putative uncharacterized protein YJL150W	P47004	1.10141	0.351544	4	1	0.139351
Uncharacterized protein YGR161W-C	Q3E744	1.10122	0.0522273	7	1	0.139104
Required for respiratory growth protein 9, mitochondrial	P40156	1.10118	0.446212	4	1	0.139048
Proteasome subunit beta type-2	P25043	1.10103	0.00712292	7	2	0.138849
ADP-ribosylation factor 2	P19146	1.1009	0.0500353	25	6	0.138677
Sporulation-specific glucan 1,3-beta-glucosidase	P32603	1.10067	0.286672	4	3	0.138387
Antagonist of mitotic exit network protein 1	P38285	1.10062	0.107131	33	11	0.138321
Mitochondrial fusion and transport protein UGO1	Q03327	1.10052	0.337646	5	4	0.138188
Histidine permease	P06775	1.10019	0.241465	8	5	0.137757
mRNA export factor MEX67	Q99257	1.10015	0.295841	15	6	0.137707
Uncharacterized protein YPR136C	O13569	1.10011	0.253876	7	2	0.137648
Putative uncharacterized protein YDL016C	Q12115	1.09993	0.0522529	8	5	0.137409
Methylenetetrahydrofolate dehydrogenase [NAD(+)]	Q02046	1.0999	0.0614618	28	9	0.137369
Putative uncharacterized protein YKL036C	P32859	1.0997	0.0164114	6	6	0.137104
Thiamine biosynthetic bifunctional enzyme	P41835	1.09963	0.04183	7	4	0.137013
Putative uncharacterized protein YPR064W	Q12492	1.0995	0.32385	6	3	0.136851
Peptidyl-prolyl cis-trans isomerase	P14832	1.09913	0.30182	1	1	0.136369
Altered inheritance of mitochondria protein 34, mitochondrial	Q03673	1.0991	0.0333862	6	3	0.136318
ER-derived vesicles protein ERV29	P53337	1.09901	0.0662879	34	3	0.136198
Transcriptional regulatory protein TOD6	P34219	1.09889	0.246094	38	8	0.136044
Sterol O-acyltransferase 2	P53629	1.09873	0.124213	7	6	0.135835
Lysine-specific permease	P32487	1.09866	0.241517	20	6	0.135748
Signal recognition particle subunit SRP68	P38687	1.09866	0.0132203	22	8	0.135744
Putative uncharacterized membrane protein YML009C-A	A0A023PYJ0	1.09852	0.24686	9	5	0.135558
Uncharacterized mitochondrial carrier YFR045W	P43617	1.09813	0.467194	7	4	0.135049
Putative uncharacterized protein YLR339C	O94085	1.09808	0.103906	2	2	0.134987
Uncharacterized protein YNL146W	P53906	1.09805	0.342585	7	2	0.13495
Serine hydroxymethyltransferase, cytosolic	P37291	1.09799	0.0655192	26	8	0.134859
Arginine metabolism regulation protein II	P05085	1.09784	0.172611	20	6	0.134663
V0 assembly protein 1	P53262	1.09781	0.211602	34	3	0.134634
60S ribosomal protein L8-A	P17076	1.09768	0.0293506	40	7	0.134452
Uncharacterized protein YFR035C	P43608	1.09767	0.0820426	2	2	0.134449
Putative uncharacterized protein YDL068W	Q07435	1.09761	0.502599	3	1	0.134362
Genetic interactor of prohibitin 5, mitochondrial	Q12393	1.09751	0.0593987	6	5	0.134238
Mitochondrial carrier protein MTM1	P53320	1.09701	0.000982928	14	6	0.133579
Topoisomerase I damage affected protein 4	P47153	1.09686	0.519018	3	2	0.133377
Manganese resistance protein MNR2	P35724	1.09655	0.0439051	33	11	0.132975
Tyrosine--tRNA ligase, mitochondrial	P48527	1.09647	0.529798	13	4	0.132873
Protein PET54	P10834	1.09647	0.135805	14	3	0.132861
60S ribosomal protein L2-A	P0CX45	1.09639	0.0385372	28	11	0.132762
Cytochrome b termination protein 1	P36038	1.09605	0.262443	5	2	0.132313
60S ribosomal protein L4-A	P10664	1.09603	0.0203293	29	9	0.132287
Pre-mRNA-splicing factor SLT11	P38241	1.09595	0.106625	5	5	0.132187
Alkylphosphocholine resistance protein LEM3	P42838	1.09576	0.340695	11	3	0.131927
ATP-dependent RNA helicase DBP8	P38719	1.0955	0.00969986	19	9	0.131593
mRNA transport regulator MTR10	Q99189	1.0955	0.043571	23	10	0.131592
Small nuclear ribonucleoprotein Sm D3	P43321	1.09529	0.244615	2	1	0.131313
Tryptophan synthase	P00931	1.09506	0.105148	40	1	0.131004
Iron-sulfur assembly protein 1	Q07821	1.09504	0.0258163	11	6	0.130987
Increased recombination centers protein 15	Q02733	1.09503	0.281691	10	4	0.130968
Translation initiation factor eIF-2B subunit delta	P12754	1.09491	0.380385	13	4	0.130808
60S ribosomal protein L9-B	P51401	1.09486	0.549455	45	7	0.130742
UPF0651 protein YPL107W, mitochondrial	Q02873	1.09485	0.10526	52	6	0.130738
Transcription initiation factor TFIID subunit 11	Q04226	1.09469	0.284025	17	5	0.130528
Cell wall protein YJL171C	P46992	1.09455	0.489275	4	1	0.130343
Probable metabolite transport protein GIT1	P25346	1.09448	0.000596643	22	1	0.130239
60S ribosomal protein L8-B	P29453	1.09433	0.0751034	46	7	0.130044
Putative cation exchanger YDL206W	Q12424	1.0943	0.276838	22	6	0.130002
Putative uncharacterized protein YAL004W	P39703	1.09423	0.370737	4	2	0.129911
Uroporphyrinogen-III C-methyltransferase	P36150	1.09413	0.101888	10	9	0.12979
Outward-rectifier potassium channel TOK1	P40310	1.09405	0.0270144	23	9	0.129683
Acetyl-CoA hydrolase	P32316	1.09398	0.0689508	23	8	0.129588
26S proteasome regulatory subunit RPN12	P32496	1.09383	0.20924	59	3	0.129389
Putative uncharacterized protein YLR184W	Q06267	1.0938	0.333591	11	5	0.129346
Replication factor C subunit 3	P38629	1.09379	0.12332	88	3	0.129339
Sister chromatid cohesion protein 2	Q04002	1.09365	0.106434	45	18	0.129148
Serine/threonine-protein kinase CHK1	P38147	1.09357	0.21754	68	7	0.129049
Mitochondrial ATPase complex subunit ATP10	P18496	1.09335	0.220769	27	6	0.128749
GTP cyclohydrolase-2	P38066	1.09323	0.29888	10	5	0.128603
Sulfate permease 2	Q12325	1.09321	0.12717	41	9	0.128575
Site-specific recombinase Flp	A0A023PYE4	1.09321	0.318299	93	1	0.128571
Cytokinesis protein 2	Q05080	1.09294	0.0236176	23	12	0.128217
Sec sixty-one protein homolog	P38353	1.09287	0.125922	8	3	0.128121
E3 ubiquitin-protein ligase linker protein MMS1	Q06211	1.09264	0.0625441	42	14	0.127816
Eukaryotic translation initiation factor 3 subunit B	P06103	1.09259	0.0760284	71	3	0.127754
Probable mannosyltransferase YUR1	P26725	1.09246	0.171626	48	10	0.127576
Lanosterol 14-alpha demethylase	P10614	1.09233	0.00372645	47	12	0.127412
Putative oxidoreductase TDA3	P38758	1.09201	0.353076	9	4	0.126987
Threonine--tRNA ligase, cytoplasmic	P04801	1.09186	0.0538705	105	3	0.126782
Isocitrate dehydrogenase [NADP], mitochondrial	P21954	1.09174	0.191554	64	3	0.126635
High-affinity nicotinic acid transporter	P53322	1.09148	0.272831	14	3	0.126286
NADH pyrophosphatase	P53164	1.09147	0.0456911	6	3	0.126271
Central kinetochore subunit MCM22	P47167	1.09146	0.433446	7	3	0.126265
Tryptophan--tRNA ligase, mitochondrial	P04803	1.09141	0.341715	24	4	0.126192
40S ribosomal protein S6-A	P0CX37	1.0913	0.287738	23	6	0.126043
Uncharacterized transporter YHL008C	P38750	1.09106	0.0156772	45	4	0.125724
Protein EMP47	P43555	1.09099	0.0828746	9	6	0.125635
Heat shock protein 70 homolog LHS1	P36016	1.09098	0.0381762	50	14	0.125621
Uncharacterized protein YIR021W-A	Q3E739	1.09079	0.271624	6	1	0.125377
U4/U6 small nuclear ribonucleoprotein PRP4	P20053	1.09069	0.0259047	19	6	0.125237
T-complex protein 1 subunit zeta	P39079	1.09067	0.213932	6	5	0.125221
Protein RIF2	Q06208	1.09061	0.0335243	81	6	0.125138
Vacuolar transporter chaperone 4	P47075	1.09053	0.00446102	100	15	0.12503
Probable metabolite transport protein YDR387C	Q04162	1.09051	0.651399	2	2	0.124996
UPF0320 protein YNR077C	P53758	1.09049	0.532043	1	1	0.124981
Uracil phosphoribosyltransferase	P18562	1.09044	0.0868248	1	1	0.124917
Biogenesis of lysosome-related organelles complex 1 subunit BLI1	P35727	1.09031	0.477557	1	1	0.124734
Uncharacterized protein YPL014W	Q02606	1.09026	0.514806	5	4	0.124676
60S ribosomal protein L5	P26321	1.09025	0.20081	31	6	0.124661
40S ribosomal protein S23-A	P0CX29	1.09017	0.0467253	55	6	0.124557
Folylpolyglutamate synthase	Q08645	1.09001	0.133147	34	10	0.124345
U3 small nucleolar RNA-associated protein 14	Q04500	1.08998	0.132997	24	16	0.124305
Sphingosine N-acyltransferase LAC1	P28496	1.08996	0.341	5	4	0.124276
Protein GVP36	P40531	1.08994	0.140918	4	4	0.124244
General negative regulator of transcription subunit 2	P06100	1.08993	0.127297	11	2	0.124236
NADPH-dependent methylglyoxal reductase GRE2	Q12068	1.08988	0.266599	10	3	0.124171
Hsp70/Hsp90 co-chaperone CNS1	P33313	1.08985	0.114163	23	9	0.124136
Uncharacterized membrane protein YOR034C-A	Q3E735	1.08975	0.0797145	5	2	0.123996
Cytoplasmic dynein intermediate light chain DYN3	Q04949	1.08925	0.00366314	19	6	0.123336
Vacuolar basic amino acid transporter 3	P25594	1.08924	0.121324	20	4	0.123319
Protein LDB17	Q12342	1.08921	0.110662	22	8	0.123279
Serine/threonine-protein phosphatase PP1-1	P20604	1.08914	0.314301	33	6	0.123195
Putative uncharacterized protein YMR245W	Q04019	1.08892	0.252309	2	2	0.122896
Helicase SEN1	Q00416	1.08869	0.15121	156	36	0.122593
40S ribosomal protein S10-B	P46784	1.08867	0.0924824	23	3	0.122566
Putative uncharacterized protein YER172C-A	A0A023PYF7	1.0886	0.155542	3	2	0.122478
Putative uncharacterized protein YLR317W	O13553	1.08828	0.54892	2	1	0.122056
Lysophosphatidic acid:oleoyl-CoA acyltransferase 1	Q06508	1.08822	0.263113	9	4	0.12197
Uncharacterized protein YDR186C	Q04007	1.08813	0.155176	51	9	0.121848
Glutathione peroxidase 1	P36014	1.0881	0.0683316	7	5	0.121816
RNA annealing protein YRA2	P36036	1.08766	0.267736	19	8	0.121231
Putative glutamine amidotransferase YLR126C	Q12288	1.08759	0.120282	7	5	0.12114
Protein GDS1	P41913	1.08756	0.309784	14	7	0.121093
Mitochondrial zinc maintenance protein 1, mitochondrial	Q03429	1.08742	0.232484	4	3	0.120906
Co-chaperone protein SBA1	P28707	1.08737	0.0251494	13	4	0.120845
Putative nitrilase-like protein YIL165C	P40446	1.08734	0.189472	5	3	0.120806
Dol-P-Glc:Glc(2)Man(9)GlcNAc(2)-PP-Dol alpha-1,2-glucosyltransferase	P50076	1.08708	0.16241	11	5	0.120464
Protein URA2	P07259	1.08698	0.0387374	53	24	0.120326
CDP-diacylglycerol--serine O-phosphatidyltransferase	P08456	1.08683	0.566373	1	1	0.120123
60S ribosomal protein L31-A	P0C2H8	1.08666	0.199162	32	4	0.1199
Serine/threonine-protein kinase RIO2	P40160	1.08657	0.136027	30	5	0.119782
Uncharacterized protein YMR147W	P40218	1.0864	0.344247	4	1	0.119552
Maintenance of telomere capping protein 1	P47018	1.08622	0.246432	28	10	0.119318
ATP synthase subunit 4, mitochondrial	P05626	1.08596	0.237244	11	7	0.118969
Uncharacterized protein YLR154C-H	P0CY02	1.08593	0.495164	3	1	0.11893
Cytochrome c1, heme protein, mitochondrial	P07143	1.08586	0.185599	18	3	0.118833
Uncharacterized protein RDT1	A0A0B7P221	1.08558	0.105951	1	1	0.118469
Methylenetetrahydrofolate reductase 1	P46151	1.08548	0.0600866	10	7	0.11833
Protein WHI3	P34761	1.08524	0.469013	8	6	0.118008
Protein MSS51, mitochondrial	P32335	1.08522	0.10076	25	12	0.117994
Uncharacterized protein YPL039W	Q03080	1.08506	0.00597984	28	8	0.117772
Mediator of RNA polymerase II transcription subunit 3	P40356	1.08497	0.0119437	2	2	0.117651
COMPASS component BRE2	P43132	1.08493	0.00133873	10	7	0.117598
Pre-mRNA-splicing factor CWC15	Q03772	1.08481	0.105978	10	5	0.117436
Plasma membrane fusion protein PRM1	P53835	1.0847	0.292929	20	8	0.117301
Phosphatidylinositol N-acetylglucosaminyltransferase subunit GPI15	P53961	1.0842	0.231944	8	2	0.116635
Ribonuclease MRP protein subunit SNM1	P40993	1.08417	0.131278	59	4	0.116596
Protein SOK1	P40317	1.08399	0.224991	7	4	0.116355
Pheromone a factor receptor	P06783	1.0838	0.440132	6	4	0.116095
Putative uncharacterized protein YMR052C-A	Q6B0Y6	1.08378	0.0432051	7	2	0.116066
Argininosuccinate synthase	P22768	1.08373	0.575458	2	2	0.116006
Proteasome chaperone 1	Q05778	1.08369	0.186082	17	3	0.115949
Outer spore wall assembly protein SHE10	P53075	1.08365	0.255172	25	7	0.115897
Oxidation resistance protein 1	Q08952	1.0836	0.203542	32	5	0.11583
26S protease subunit RPT4	Q01939	1.08354	0.0343878	71	5	0.115754
Uncharacterized protein VPS63	O13549	1.0835	0.235979	15	6	0.115693
ADP-ribose 1''-phosphate phosphatase	P38218	1.0833	0.349859	10	2	0.115434
Serine/threonine-protein kinase STE7	P06784	1.08322	0.325709	4	4	0.115329
Hypoxanthine-guanine phosphoribosyltransferase	Q04178	1.08306	0.160163	13	6	0.115113
Negative regulator of RAS-cAMP pathway	P34072	1.08278	0.257556	17	9	0.114735
Transcription elongation factor S-II	P07273	1.08275	0.215406	19	6	0.114705
Protein KTI12	P34253	1.08268	0.190214	53	6	0.114607
Sphingosine N-acyltransferase LAG1	P38703	1.08264	0.026536	3	3	0.114557
Cardiolipin-specific deacylase 1, mitochondrial	P53264	1.0826	0.281825	28	8	0.114496
Low-affinity phosphate transporter PHO91	P27514	1.08245	0.0614002	17	6	0.114303
Putative uncharacterized protein YLR171W	O13562	1.08242	0.232545	3	1	0.114267
Serine/threonine-protein kinase TOR1	P35169	1.0824	0.0641862	142	32	0.114236
Protein RCR2	Q03446	1.0823	0.439384	68	4	0.114107
Putative uncharacterized protein YNL114C	P53926	1.08228	0.398753	1	1	0.114076
Karyogamy protein KAR9	P32526	1.08187	0.369236	22	12	0.113533
Mitochondrial phosphate carrier protein 2	P40035	1.08184	0.176551	28	8	0.113492
Actin-related protein 2/3 complex subunit 4	P33204	1.08182	0.00835944	11	4	0.113458
25S rRNA (adenine(645)-N(1))-methyltransferase	P38961	1.08177	0.0485214	54	10	0.113394
Putative lipase YDL109C	Q12103	1.08171	0.128997	16	5	0.113315
Zuotin	P32527	1.08169	0.233369	32	5	0.113284
54S ribosomal protein L27, mitochondrial	P36526	1.08168	0.0983416	17	2	0.113279
Mannan polymerase II complex ANP1 subunit	P32629	1.08162	0.00844118	29	9	0.1132
6-phosphogluconate dehydrogenase, decarboxylating 2	P53319	1.08128	0.235882	26	12	0.11274
Serine/threonine-protein phosphatase 2A activator 2	Q12461	1.08126	0.117382	33	7	0.11271
Putative uncharacterized protein YJR140W-A	Q8TGN1	1.08113	0.119125	2	2	0.11254
Probable mannosyltransferase KTR7	P40504	1.08101	0.00666278	18	8	0.112383
Translation machinery-associated protein 20	P89886	1.08091	0.366072	14	4	0.11225
Protein PER1	P25625	1.08084	0.0289083	40	4	0.112156
Morphogenesis-related protein MSB1	P21339	1.08038	0.227501	33	13	0.111539
RNA polymerase II subunit A C-terminal domain phosphatase SSU72	P53538	1.08026	0.0139913	29	3	0.111376
Putative uncharacterized protein MBB1	P39534	1.08021	0.430344	2	1	0.111306
DOA4-independent degradation protein 4	P36108	1.08014	0.22872	6	3	0.111221
Protein AST2	P39945	1.08007	0.299498	3	3	0.111123
FACT complex subunit POB3	Q04636	1.08003	0.365818	18	1	0.111075
Oligo-1,6-glucosidase IMA5	P40884	1.07992	0.274273	47	7	0.110926
Fluoride export protein 2	Q08991	1.07991	0.152708	57	3	0.110915
Probable transporter MCH1	Q07376	1.0799	0.174384	13	2	0.110902
Farnesyl pyrophosphate synthase	P08524	1.07982	0.131362	53	1	0.110785
AP-1 complex subunit mu-1-I	Q00776	1.07968	0.00686614	33	6	0.110606
Putative uncharacterized protein YDL162C	Q12307	1.07956	0.00688116	154	1	0.11044
Phosphoinositide phosphatase SAC1	P32368	1.07941	0.0130988	36	14	0.110239
Vacuolar ATPase assembly integral membrane protein VPH2	P32341	1.07939	0.171089	113	4	0.110216
Uncharacterized protein YBR182C-A	Q8TGU6	1.07922	0.0205948	10	1	0.109993
Nucleolar protein 4	P37838	1.07919	0.36027	35	17	0.109949
Dilute domain-containing protein YPR089W	O13585	1.07918	0.11988	24	6	0.109932
Protein DIA1	P54005	1.07914	0.0742999	19	6	0.109886
Trafficking protein particle complex subunit 23	Q03784	1.07907	0.059493	47	6	0.109783
Protein NRD1	P53617	1.079	0.446086	10	5	0.109689
Elongation factor 3A	P16521	1.0788	0.0160715	86	21	0.109422
Putative uncharacterized protein YOR333C	Q08789	1.0787	0.503286	2	2	0.109294
Rho-GTPase-activating protein RGD2	P43556	1.0787	0.186757	78	16	0.109288
Tyrosine--tRNA ligase, cytoplasmic	P36421	1.07868	0.171117	23	7	0.109271
GPN-loop GTPase 3	Q06543	1.07867	0.0283466	3	1	0.10926
Putative uncharacterized protein YER066C-A	P87263	1.07866	0.0743096	10	4	0.109247
Serine/threonine-protein kinase RIM11/MSD1	P38615	1.07862	0.25738	18	4	0.109188
Catabolic L-serine/threonine dehydratase	P25379	1.07847	0.130724	14	5	0.10898
Subtilase-type proteinase RRT12	P25381	1.07846	0.0952443	7	6	0.108974
Protein PBDC1 homolog	Q08971	1.07845	0.289208	13	6	0.108964
Enoyl-[acyl-carrier protein] reductase [NADPH, B-specific], mitochondrial	P38071	1.07843	0.152744	15	7	0.108927
RNA polymerase II assembly factor RTP1	Q12751	1.07827	0.692397	29	9	0.108717
Protein TMA108	P40462	1.07826	0.0685468	17	9	0.108711
Protein STB6	P36085	1.07814	0.0345788	60	15	0.108538
54S ribosomal protein L1, mitochondrial	Q04599	1.07807	0.395279	43	7	0.108447
Protein BIG1	P38813	1.07806	0.392555	42	8	0.108437
G1/S-specific cyclin CLN2	P20438	1.07791	0.443985	8	5	0.108233
Aspartic proteinase yapsin-3	Q12303	1.07777	0.193803	22	6	0.108048
Alpha-ketoglutarate-dependent sulfonate dioxygenase	Q12358	1.07774	0.150842	11	4	0.108007
Histidine--tRNA ligase, mitochondrial	P07263	1.0777	0.00928451	126	1	0.107952
RHO GTPase-activating protein RGD1	P38339	1.0777	0.202258	29	8	0.10795
Chromatin structure-remodeling complex subunit RSC4	Q02206	1.07765	0.0380231	113	10	0.107889
Structural maintenance of chromosomes protein 3	P47037	1.07758	0.231596	57	23	0.107796
Histone transcription regulator 3	P47171	1.07755	0.0970766	28	15	0.107756
Sporulation-specific protein 71	Q03868	1.07753	0.285365	94	36	0.107721
SNF1 protein kinase subunit beta-2	P34164	1.07745	0.215345	5	5	0.10762
Uncharacterized protein YJL028W	P47062	1.0774	0.485165	3	2	0.107555
Alcohol O-acetyltransferase 2	P53296	1.0774	0.103436	12	7	0.107549
Isoleucine--tRNA ligase, cytoplasmic	P09436	1.07703	0.159497	117	7	0.107064
Very-long-chain enoyl-CoA reductase	Q99190	1.077	0.419922	44	7	0.107015
ATP-dependent 6-phosphofructokinase subunit alpha	P16861	1.07692	0.0654849	149	8	0.106913
Protein HIR1	P32479	1.07681	0.020972	38	13	0.106767
Uncharacterized protein YLR307C-A	Q3E825	1.07678	0.493961	3	1	0.106723
37S ribosomal protein MRP2, mitochondrial	P10663	1.07677	0.0635413	76	20	0.106707
Protein RFS1	P38234	1.07674	0.0322082	23	4	0.106664
Nascent polypeptide-associated complex subunit alpha	P38879	1.07668	0.265046	1	1	0.10659
Putative uncharacterized protein YJL120W	P47020	1.07666	0.719738	3	2	0.106561
Importin subunit beta-5	P53067	1.07665	0.155137	60	7	0.106554
Serine/threonine-protein kinase HAL5	P38970	1.07661	0.0149599	22	14	0.106494
Sterol 3-beta-glucosyltransferase	Q06321	1.07637	0.250585	58	21	0.106173
Uncharacterized protein YJR151W-A	Q3E775	1.0763	0.561844	1	1	0.106076
Pre-mRNA-splicing factor CLF1	Q12309	1.0762	0.435132	30	14	0.105947
Peroxisomal membrane protein PEX18	P38855	1.07611	0.220072	33	7	0.105829
Tyrosine-protein phosphatase 1	P25044	1.076	0.164009	10	6	0.105677
N-terminal acetyltransferase B complex catalytic subunit NAT3	Q06504	1.07597	0.0795807	13	4	0.105644
Leucine-rich repeat-containing protein SOG2	Q08817	1.07585	0.385785	40	6	0.105482
Transcription factor SMP1	P38128	1.07576	0.00245657	7	3	0.105357
Mitochondrial phosphate carrier protein	P23641	1.07572	0.0505625	17	2	0.105308
5-formyltetrahydrofolate cyclo-ligase	P40099	1.07567	0.442017	4	3	0.105232
Ribose-phosphate pyrophosphokinase 3	P38689	1.07566	0.362969	17	5	0.105229
Sterol regulatory element-binding protein ECM22	Q05958	1.07566	0.0239673	16	7	0.105224
Serine/threonine-protein phosphatase 2B catalytic subunit A1	P23287	1.07556	0.354661	66	22	0.105085
DNA-directed RNA polymerase III subunit RPC9	P47076	1.0755	0.240182	5	3	0.105009
Isocitrate dehydrogenase [NAD] subunit 1, mitochondrial	P28834	1.0754	0.111792	20	8	0.104877
Pre-mRNA leakage protein 39	Q03760	1.07536	0.34181	20	11	0.104823
ATP-dependent RNA helicase DBP6	P53734	1.07533	0.0710607	23	13	0.104775
Low-affinity Fe(2+) transport protein	P40988	1.07525	0.217763	31	9	0.104671
Bud site selection protein RAX2	Q12465	1.07523	0.321188	6	3	0.10464
Ubiquitin-conjugating enzyme E2 13	P52490	1.07494	0.286144	7	4	0.104262
Nucleoporin NUP120	P35729	1.07481	0.153329	45	10	0.104085
Uncharacterized mitochondrial carrier YPR011C	Q12251	1.07481	0.175734	14	3	0.104082
GTP-binding protein YPT10	P38146	1.0748	0.143406	27	2	0.104062
Protein THO1	P40040	1.07478	0.0695503	8	3	0.104037
DNA-directed RNA polymerase II subunit RPB1	P04050	1.07469	0.586022	80	2	0.103923
Uncharacterized protein YER158C	P40095	1.07463	0.0757729	17	8	0.103844
Cell division control protein 73	Q06697	1.07458	0.0729488	50	7	0.103774
Putative uncharacterized protein YEL008W	P40001	1.07439	0.0174859	14	1	0.103516
Cullin-3	P53202	1.07434	0.216641	5	3	0.103446
Mitochondrial Rho GTPase 1	P39722	1.07433	0.185978	27	8	0.103438
54S ribosomal protein IMG2, mitochondrial	P25642	1.07425	0.284324	9	5	0.103332
Cytochrome b5	P40312	1.07415	0.41641	14	4	0.103194
Protein ATS1	P31386	1.07404	0.31081	3	2	0.103042
60S ribosomal protein L31-B	P0C2H9	1.07393	0.401744	28	5	0.102905
Protein EAP1	P36041	1.07379	0.0293427	9	5	0.102707
Protein ZRG17	P53735	1.07378	0.139845	6	2	0.102703
Sphingolipid long chain base-responsive protein PIL1	P53252	1.07377	0.312885	11	2	0.102683
Mitochondrial peroxiredoxin PRX1	P34227	1.07364	0.222024	15	1	0.102509
Silenced mating-type protein A1	P0CY11	1.07359	0.352548	2	1	0.102437
Outer spore wall protein 7	P43611	1.0735	0.183131	48	9	0.10232
Allantoicase	P25335	1.07312	0.377215	5	3	0.101811
Serine/threonine-protein kinase KIN2	P13186	1.0731	0.0676678	49	13	0.101786
Putative uncharacterized protein YLR302C	O13544	1.073	0.528244	4	3	0.101648
40S ribosomal protein S14-B	P39516	1.07297	0.299386	10	4	0.101607
Pachytene checkpoint protein 2	P38126	1.07285	0.0686174	27	7	0.101454
Low-affinity glucose transporter HXT3	P32466	1.0728	0.390967	29	7	0.101379
Uncharacterized protein YJR011C	P47086	1.07266	0.246256	27	2	0.101189
Ubiquitin carboxyl-terminal hydrolase 11	P36026	1.07263	0.11184	70	13	0.101154
rRNA-processing protein FCF2	Q12035	1.0726	0.0816043	16	7	0.10111
Mannosyltransferase KTR6	P54070	1.07258	0.350107	13	4	0.101079
Uncharacterized protein YOR381W-A	Q3E804	1.07257	0.394357	8	2	0.101071
Arrestin-related trafficking adapter 10	P18634	1.07248	0.211948	47	11	0.100946
Probable transcriptional regulatory protein HAH1	P53212	1.07245	0.249441	11	4	0.100916
Mitochondrial homologous recombination protein 1	Q06630	1.07243	0.0721722	6	2	0.100885
56 kDa U1 small nuclear ribonucleoprotein component	Q03782	1.07242	0.23718	13	10	0.100865
DNA repair protein RAD55	P38953	1.0723	0.318674	12	5	0.100705
Nutrient and stress factor 1	Q12132	1.07228	0.0229713	12	8	0.100687
Dolichyl-diphosphooligosaccharide--protein glycosyltransferase subunit STT3	P39007	1.07226	0.221845	14	5	0.100657
Multiple RNA-binding domain-containing protein 1	Q06106	1.07207	0.00715197	76	18	0.100394
General control protein GCN4	P03069	1.07191	0.650911	2	1	0.100186
Mitochondrial chaperone BCS1	P32839	1.07174	0.61863	37	5	0.0999539
Uncharacterized protein YOR114W	Q12219	1.07171	0.0837062	30	8	0.0999098
Intron-encoded DNA endonuclease aI4	P03878	1.07167	0.0393886	57	11	0.0998667
Assembly chaperone of RPL4	Q03771	1.07166	0.281343	4	1	0.0998499
Glutathione-specific gamma-glutamylcyclotransferase	P32656	1.07164	0.189378	4	2	0.0998201
Enhancer of mRNA-decapping protein 1	P53080	1.07161	0.161059	1	1	0.0997795
Mitochondrial morphogenesis protein SLD7	Q08457	1.07154	0.348324	20	3	0.0996832
Protein ECM12	O13529	1.0715	0.680945	2	2	0.0996313
RNA-binding protein MRN1	Q08925	1.07145	0.382505	20	6	0.0995582
Mitochondrial nicotinamide adenine dinucleotide transporter 2	P39953	1.07143	0.029372	9	3	0.0995427
Putative uncharacterized protein YPR099C	O13548	1.07143	0.330072	1	1	0.0995356
Protein BTN2	P53286	1.07137	0.351804	4	3	0.0994506
rRNA-processing protein UTP23	Q12339	1.07135	0.228811	75	8	0.099436
Ribose-phosphate pyrophosphokinase 4	P38063	1.07108	0.387176	6	4	0.0990723
Transcription factor RLM1	Q12224	1.07097	0.0360509	23	6	0.098913
Protein phosphatase PP2A regulatory subunit A	P31383	1.07093	0.0478722	21	8	0.0988692
Spindle pole body component KRE28	Q04431	1.0709	0.15776	23	11	0.0988211
Multisubstrate pseudouridine synthase 7	Q08647	1.07086	0.0891596	34	15	0.0987748
Phosphoglucomutase 1	P33401	1.07085	0.559044	37	11	0.0987601
Inorganic phosphate transporter PHO84	P25297	1.07082	0.0218549	10	3	0.0987127
Sulfate permease 1	P38359	1.07059	0.23511	60	10	0.0984013
Ino eighty subunit 1	P43579	1.07056	0.0283969	32	9	0.0983707
GTP-binding protein YPT1	P01123	1.07051	0.220309	10	1	0.0983027
Diphthamide biosynthesis protein 2	P32461	1.07049	0.217782	22	4	0.0982684
Reduced meiotic recombination protein 1	P53060	1.07047	0.678384	1	1	0.0982382
Putative endoplasmic reticulum mannosidase MNL2	Q12205	1.07045	0.199524	49	7	0.0982165
Porphobilinogen deaminase	P28789	1.07038	0.113924	6	4	0.098121
Altered inheritance of mitochondria protein 4	P38305	1.07012	0.0609124	12	5	0.0977692
Thioredoxin reductase 1	P29509	1.07009	0.544353	4	4	0.0977326
UBX domain-containing protein 1	P34223	1.07005	0.0526254	19	10	0.0976798
Protein DML1	Q03652	1.06994	0.0594189	46	10	0.0975277
Actin-related protein 7	Q12406	1.06983	0.123973	11	4	0.0973866
Obg-like ATPase 1	P38219	1.06981	0.167527	52	2	0.0973613
Nonsense-mediated mRNA decay protein 5	P46970	1.06981	0.125218	74	11	0.097354
Uncharacterized protein YMR187C	Q03236	1.06976	0.0416871	5	3	0.0972939
Growth regulation protein	P12611	1.06976	0.313988	13	4	0.097286
Ino eighty subunit 4	Q08561	1.06974	0.441838	9	3	0.0972664
H/ACA ribonucleoprotein complex subunit 2	P32495	1.06968	0.219651	5	4	0.0971759
Putative uncharacterized protein YBL012C	P38209	1.06963	0.378935	10	4	0.0971143
Protein ZDS2	P54786	1.06959	0.0355659	46	21	0.0970637
Putative uncharacterized protein YPL135C-A	Q8TGK9	1.06957	0.141205	5	1	0.0970291
Transcription factor PDR8	Q06149	1.06953	0.174528	26	7	0.0969712
Protein MGA2	P40578	1.06951	0.0822372	25	12	0.0969515
Protein BCH1	Q05029	1.06945	0.498033	37	11	0.0968757
Cleavage factor two protein 2	Q12102	1.06934	0.223126	71	13	0.0967169
Pumilio homology domain family member 4	P25339	1.06926	0.119955	7	6	0.0966135
Putative transcription factor PHD1	P36093	1.06903	0.158468	15	8	0.0962961
Synchronized import protein 1	Q07395	1.06902	0.350446	6	4	0.0962858
Regulator of free ubiquitin chains 1	Q08003	1.06901	0.309815	4	2	0.0962698
Uncharacterized protein YLL006W-A	Q3E814	1.06862	0.482736	2	1	0.0957541
Uncharacterized protein YOR011W-A	Q3E807	1.06861	0.0785034	7	2	0.0957418
Palmitoyltransferase PFA3	P42836	1.06859	0.581838	3	2	0.0957058
Ferric/cupric reductase transmembrane component 2	P36033	1.06857	0.0427106	63	9	0.0956758
Peptidyl-prolyl cis-trans isomerase D	P35176	1.06855	0.192943	65	4	0.0956489
GTP-binding protein RHO1	P06780	1.0685	0.218883	4	1	0.0955855
Putative uncharacterized protein YKL131W	P36067	1.0683	0.44966	10	2	0.0953206
NAD-specific glutamate dehydrogenase	P33327	1.06829	0.0393487	42	12	0.0952968
J domain-containing protein 1	Q12350	1.0682	0.00542709	28	9	0.095179
Deoxyuridine 5'-triphosphate nucleotidohydrolase	P33317	1.06797	0.350811	6	3	0.0948646
N-acetyltransferase ECO1	P43605	1.06784	0.00310262	16	5	0.094698
rRNA methyltransferase 2, mitochondrial	P53123	1.06768	0.272249	39	8	0.0944813
Dimethyladenosine transferase	P41819	1.06748	0.326706	10	7	0.0942148
Protein N-terminal amidase	P40354	1.06743	0.167896	20	6	0.0941442
Putative 2-hydroxyacyl-CoA lyase	P39994	1.06738	0.437432	6	4	0.0940677
Autophagy-related protein 40	Q99325	1.06735	0.442928	8	2	0.094035
Bud site selection protein 22	Q04347	1.06734	0.408755	18	10	0.0940252
60S ribosomal protein L16-B	P26785	1.06733	0.176723	42	9	0.0940034
Mitochondrial 2-methylisocitrate lyase	Q12031	1.06723	0.631428	12	7	0.0938711
Oligo(A)/oligo(T)-binding protein	P13483	1.06715	0.43099	1	1	0.0937615
[Pyruvate dehydrogenase [acetyl-transferring]]-phosphatase 1, mitochondrial	Q12511	1.0671	0.378655	43	10	0.0936912
Uncharacterized protein YGR066C	P53242	1.06706	0.0913087	16	3	0.0936355
Serine/threonine-protein kinase PSK2	Q08217	1.06685	0.28554	31	14	0.0933566
Ribosome maturation protein SDO1	Q07953	1.06675	0.194447	17	6	0.0932228
Uncharacterized protein YLR179C	Q06252	1.06669	0.0358912	15	3	0.093137
U3 small nucleolar RNA-associated protein 8	P53276	1.06658	0.125729	79	10	0.0929947
Serine/threonine-protein kinase CBK1	P53894	1.06655	0.322529	37	8	0.0929548
Protein ISD11	Q6Q560	1.06654	0.134828	9	4	0.0929422
Protein YRO2	P38079	1.06653	0.12233	22	1	0.0929269
Uncharacterized membrane protein YOL073C	Q08232	1.06651	0.688906	2	2	0.0929034
Exocyst complex component SEC6	P32844	1.06643	0.145286	50	16	0.0927829
[Pyruvate dehydrogenase (acetyl-transferring)] kinase 2, mitochondrial	P53170	1.0664	0.398745	58	10	0.0927478
Meiotic recombination 1 protein	P16523	1.06633	0.481248	4	2	0.0926478
Probable gluconokinase	Q03786	1.06616	0.027844	92	7	0.0924257
Potassium-activated aldehyde dehydrogenase, mitochondrial	P46367	1.06615	0.00968858	68	3	0.0924092
Isocitrate lyase	P28240	1.06604	0.122292	23	12	0.092258
Verprolin	P37370	1.0657	0.308993	7	6	0.0918016
GTP-binding protein RHO4	Q00246	1.0657	0.247086	4	1	0.0917987
Autophagy-related protein 22	P25568	1.06564	0.554268	2	1	0.0917193
Pyruvate carboxylase 1	P11154	1.06559	0.0208692	89	11	0.0916459
Uncharacterized SVF1-like protein YLR225C	Q05948	1.06558	0.010482	31	9	0.0916378
Pre-mRNA-splicing factor 18	P33411	1.06557	0.541442	4	2	0.0916229
Malate synthase 2, glyoxysomal	P21826	1.06556	0.165439	38	13	0.0916056
Probable hydrolase NIT2	P47016	1.06555	0.19555	10	4	0.0915963
Serine/threonine-protein kinase PTK2/STK2	P47116	1.06554	0.132286	36	12	0.0915829
Methylsterol monooxygenase	P53045	1.06544	0.14488	16	4	0.0914507
Isopentenyl-diphosphate Delta-isomerase	P15496	1.06519	0.192955	61	3	0.0911168
Protein farnesyltransferase subunit beta	P22007	1.06494	0.00984315	12	7	0.0907745
S-methylmethionine permease 1	Q12372	1.06488	0.496768	16	7	0.0906888
Protein HYM1	P32464	1.06487	0.383698	11	4	0.0906717
Type 2A phosphatase activator TIP41	Q12199	1.06476	0.243205	13	8	0.090528
Protein IMPACT homolog	P25637	1.06471	0.37111	15	3	0.0904615
Putative uncharacterized protein YGL199C	P53092	1.06467	0.67405	1	1	0.0904032
Putative uncharacterized protein YPR012W	Q04203	1.06466	0.284609	6	1	0.0903932
Transcriptional activator SPT7	P35177	1.06458	0.100702	147	32	0.0902787
30 kDa heat shock protein	P25619	1.06456	0.072875	8	2	0.0902632
Fe repressor of activation 2	P53082	1.06456	0.23324	17	3	0.0902595
Peroxisomal membrane protein PEX14	P53112	1.06454	0.221488	15	5	0.0902275
Glutamyl-tRNA(Gln) amidotransferase subunit B, mitochondrial	P33893	1.06446	0.640775	26	6	0.0901283
Uncharacterized protein YOL038C-A	Q3E7Z9	1.06436	0.722828	2	1	0.0899819
Putative maintenance of telomere capping protein 7	P32633	1.06431	0.42524	3	2	0.0899131
60S ribosomal protein L28	P02406	1.06429	0.169563	97	5	0.0898898
Uncharacterized trans-sulfuration enzyme YHR112C	P38716	1.06426	0.133139	14	3	0.0898532
Protein ICE2	P40499	1.06411	0.262226	50	6	0.0896494
Putative uncharacterized protein YPR142C	O13570	1.06404	0.0707282	6	1	0.0895537
D-lactate dehydrogenase [cytochrome] 3	P39976	1.06397	0.514623	29	11	0.0894601
AP-2 complex subunit beta	P27351	1.06396	0.148894	37	4	0.0894452
Uncharacterized protein YOL097W-A	Q3E7Y9	1.06378	0.18431	32	1	0.0891948
ARF guanine-nucleotide exchange factor 2	P39993	1.06374	0.0660999	29	13	0.0891491
Protein FUN14	P18411	1.06373	0.273545	8	4	0.0891367
Elongation factor 1-alpha	P02994	1.06359	0.0380191	325	26	0.0889416
Uncharacterized protein YJR039W	P47107	1.0635	0.315098	26	16	0.0888232
Vacuolar protein sorting-associated protein 27	P40343	1.06333	0.531295	25	13	0.0885905
Factor arrest protein 8	Q05040	1.06333	0.284219	11	7	0.0885894
Transcriptional regulatory protein LGE1	Q02796	1.06331	0.279807	6	2	0.0885638
Importin beta SMX1	Q04175	1.06322	0.454541	22	10	0.0884338
Carboxypeptidase Y	P00729	1.06318	0.170098	48	8	0.0883855
Methylated RNA-binding protein 1	Q06390	1.06315	0.0129045	12	5	0.0883495
Protein MON2	P48563	1.06306	0.0934822	38	12	0.0882179
Uncharacterized protein YJL077W-B	Q8TGT3	1.06305	0.568735	3	1	0.0882072
Uncharacterized endoplasmic reticulum membrane protein YNL046W	P53956	1.06287	0.163557	5	5	0.0879698
Cytochrome c oxidase assembly factor 6	Q3E846	1.06284	0.426969	5	2	0.087922
Ferulic acid decarboxylase 1	Q03034	1.06283	0.505971	7	4	0.087912
Uncharacterized protein YMR317W	Q04893	1.06265	0.243724	9	5	0.0876662
High osmolarity signaling protein SHO1	P40073	1.06265	0.180465	15	2	0.0876598
Ribosome quality control complex subunit 2	Q12532	1.06261	0.159692	33	15	0.0876086
Vacuolar protein sorting-associated protein 62	P53285	1.0625	0.246636	31	13	0.0874586
Sporulation-specific protein 75	Q07798	1.06232	0.0477757	54	16	0.0872236
UPF0674 endoplasmic reticulum membrane protein YNR021W	P53723	1.06222	0.122028	14	6	0.0870851
Inositol-3-phosphate synthase	P11986	1.06192	0.303581	34	7	0.0866762
Sterol uptake protein 2	Q12286	1.06171	0.111704	14	2	0.0863901
Probable transcription factor TDA9	Q04545	1.06163	0.156672	81	15	0.0862831
Serine/threonine-protein kinase CLA4	P48562	1.0616	0.193239	17	13	0.0862414
Prolyl 3,4-dihydroxylase TPA1	P40032	1.06149	0.0575155	49	12	0.0860945
Serine/threonine-protein kinase YPK2/YKR2	P18961	1.06142	0.037999	43	15	0.0859977
General negative regulator of transcription subunit 5	Q12514	1.06139	0.167915	34	13	0.0859547
Hexose transporter HXT11	P54862	1.06128	0.0481282	29	7	0.0858028
Retrograde regulation protein 1	P32607	1.06125	0.601362	1	1	0.085768
Mitochondrial holo-[acyl-carrier-protein] synthase	Q12036	1.06115	0.518118	142	6	0.0856341
Ferric reductase transmembrane component 5	Q08908	1.06109	0.250576	37	9	0.0855434
Nitrogen permease reactivator protein	P22211	1.06097	0.0922551	23	9	0.085382
Cytochrome c oxidase protein 20, mitochondrial	Q04935	1.06097	0.610927	6	3	0.0853793
DNA-directed RNA polymerase II subunit RPB11	P38902	1.06089	0.188115	13	3	0.0852743
Choline kinase	P20485	1.06087	0.187521	18	11	0.0852416
General amino acid permease AGP1	P25376	1.06083	0.450202	16	6	0.0851897
Mitochondrial outer membrane protein porin 1	P04840	1.06083	0.442976	29	2	0.0851884
Lysophosphatidylcholine acyltransferase	Q06510	1.06082	0.130175	22	7	0.085181
Mediator of RNA polymerase II transcription subunit 22	P32570	1.06082	0.222834	4	3	0.0851789
Mediator of RNA polymerase II transcription subunit 5	P53114	1.06078	0.406549	121	17	0.0851268
Peptidyl-prolyl cis-trans isomerase B	P23285	1.06075	0.416113	4	4	0.0850827
Glycerol uptake protein 2	Q08929	1.06057	0.323492	32	6	0.0848408
Oligoribonuclease, mitochondrial	P54964	1.06048	0.495312	13	5	0.0847234
Sporulation-specific chitinase 2	Q06350	1.06044	0.237736	7	5	0.0846647
Autophagy-related protein 14	P38270	1.06036	0.0555325	7	3	0.0845549
Halotolerance protein HAL1	Q01766	1.06025	0.508867	44	6	0.0844001
40S ribosomal protein S26-B	P39939	1.06016	0.496467	5	4	0.0842797
ADIPOR-like receptor IZH3	Q07959	1.06015	0.39887	261	9	0.0842724
ATP-dependent RNA helicase DRS1	P32892	1.06014	0.349747	34	14	0.0842572
Suppressor of kinetochore protein 1	P52286	1.06005	0.385115	2	1	0.0841386
Vacuolar protein sorting-associated protein 70	P47161	1.06	0.191217	56	12	0.0840661
Phospho-2-dehydro-3-deoxyheptonate aldolase, tyrosine-inhibited	P32449	1.05997	0.577614	12	2	0.0840188
Transcription factor PDR3	P33200	1.05991	0.0420999	116	14	0.08394
Putative glucokinase-2	Q04409	1.05986	0.0550836	79	7	0.0838694
DUP240 protein YAR029W	P39549	1.05973	0.239741	20	1	0.0837001
40S ribosomal protein S16-A	P0CX51	1.05972	0.125502	12	5	0.0836815
Mitotic spindle checkpoint component MAD2	P40958	1.05972	0.15815	106	3	0.0836809
Putative uncharacterized protein YCR049C	P25629	1.05967	0.464329	2	2	0.0836195
Glycerophosphodiester phosphodiesterase GDE1	Q02979	1.05961	0.403825	16	11	0.0835341
Myosin-4	P32492	1.05959	0.337579	117	27	0.0835007
GLC7-interacting protein 4	P39732	1.05958	0.0569112	99	14	0.083497
40S ribosomal protein S7-B	P48164	1.05958	0.126451	35	7	0.0834872
Nucleoporin NDC1	P32500	1.05944	0.0774035	62	16	0.0833043
Saccharopepsin	P07267	1.05919	0.591555	12	5	0.0829672
Uncharacterized membrane protein YMR010W	Q03687	1.05914	0.121624	2	2	0.0828902
Putative uncharacterized protein YHR045W	P38775	1.05913	0.504493	8	6	0.0828762
54S ribosomal protein L36, mitochondrial	P36531	1.05911	0.651871	4	4	0.0828468
Restriction of telomere capping protein 1	Q08281	1.05897	0.200881	137	19	0.0826557
Mitochondrial import inner membrane translocase subunit TIM23	P32897	1.05896	0.0391362	12	1	0.0826503
2-oxoglutarate dehydrogenase, mitochondrial	P20967	1.05893	0.0891094	47	18	0.0826092
Putative uncharacterized protein YBR103C-A	P0C5L3	1.05886	0.347415	1	1	0.0825053
Phosphatidyl-N-methylethanolamine N-methyltransferase	P05375	1.05885	0.132491	22	2	0.0824988
Mitochondrial RNA-splicing protein MRS4	P23500	1.05885	0.250675	6	3	0.0824941
Factor arrest protein 7	P43592	1.05869	0.196142	10	7	0.0822842
Serine/threonine-protein kinase TDA1	Q03533	1.05867	0.243528	24	9	0.0822495
Autophagy-related protein 23	Q06671	1.05861	0.0524793	14	6	0.0821692
Nucleoporin NUP1	P20676	1.05846	0.344314	59	13	0.081962
Poly(A) RNA polymerase protein 1	P48561	1.05845	0.401512	56	12	0.0819478
DNA polymerase alpha subunit B	P38121	1.05843	0.123904	37	12	0.0819194
Pre-mRNA-splicing factor 6	P19735	1.05815	0.138713	92	25	0.0815503
Cytochrome c oxidase assembly protein COX11, mitochondrial	P19516	1.05805	0.105183	22	5	0.0814035
Mitogen-activated protein kinase HOG1	P32485	1.05797	0.213827	14	5	0.0813017
GPI transamidase component GPI16	P38875	1.05797	0.138272	6	4	0.0812935
Phosphatidylinositol transfer protein CSR1	Q06705	1.05792	0.225714	72	10	0.0812364
Uncharacterized protein YPL077C	Q02831	1.05786	0.535497	3	2	0.0811421
Transmembrane protein 115 homolog	Q12239	1.05784	0.70377	2	2	0.0811169
Fructose-1,6-bisphosphatase	P09201	1.05783	0.0261603	3	1	0.0811073
Homeobox protein YHP1	Q04116	1.0578	0.349048	6	4	0.0810679
Protein PCF11	P39081	1.05778	0.223179	29	13	0.0810456
Probable 2-methylcitrate dehydratase	Q12428	1.05776	0.0539172	75	7	0.0810104
60S ribosomal protein L18-A	P0CX49	1.0577	0.358438	86	9	0.0809289
Mitochondrial distribution and morphology protein 32	Q12171	1.05763	0.302654	11	7	0.080841
Putative uncharacterized protein YIL100W	P40490	1.05758	0.518003	2	2	0.0807701
Ferric/cupric reductase transmembrane component 7	Q12333	1.05755	0.300494	13	6	0.0807326
Glycerol-3-phosphate O-acyltransferase 2	P36148	1.05751	0.0347355	83	22	0.0806761
Cytochrome c oxidase subunit 6B	Q01519	1.05746	0.676635	7	2	0.0806013
Mediator of RNA polymerase II transcription subunit 17	P32569	1.05742	0.0479742	48	9	0.080554
Inner centromere protein-related protein SLI15	P38283	1.0574	0.161709	115	25	0.0805175
Diacylglycerol pyrophosphate phosphatase 1	Q05521	1.0574	0.345256	6	4	0.0805161
U1 small nuclear ribonucleoprotein component PRP42	Q03776	1.05739	0.0807084	26	13	0.0805055
DNA repair protein KRE29	P40026	1.05733	0.266146	35	5	0.0804191
Endoplasmic reticulum mannosyl-oligosaccharide 1,2-alpha-mannosidase	P32906	1.0573	0.383953	13	2	0.0803882
1,3-beta-glucan synthase component FKS1	P38631	1.05724	0.508596	44	1	0.0803025
Probable S-adenosylmethionine-dependent methyltransferase CRG1	P38892	1.05716	0.450813	13	7	0.0801918
Protein SHQ1	P40486	1.05698	0.10281	16	8	0.0799545
Putative uncharacterized protein YOL024W	Q08172	1.05694	0.582938	2	2	0.0798889
Galactose transporter	P13181	1.05694	0.191656	34	8	0.0798873
Peroxisomal membrane protein PEX17	P40155	1.05679	0.294243	10	2	0.0796948
40S ribosomal protein S5	P26783	1.05677	0.300447	38	8	0.0796566
Sporulation-specific protein 20	Q04359	1.05675	0.365092	5	4	0.0796364
Putative platinum sensitivity protein 1	P36082	1.05666	0.311529	3	1	0.0795074
60S ribosomal protein L36-A	P05745	1.0566	0.206767	24	8	0.0794236
Axial budding pattern protein 2	P38928	1.05648	0.294413	13	5	0.0792687
NAD-dependent histone deacetylase SIR2	P06700	1.05648	0.0266577	28	9	0.0792622
NADP-dependent 3-hydroxy acid dehydrogenase	Q05016	1.05636	0.424583	11	4	0.0791034
26S proteasome regulatory subunit RPN6	Q12377	1.0563	0.499079	22	10	0.0790184
Coenzyme A biosynthesis protein 3	P36076	1.05628	0.531352	23	10	0.0789944
Probable dolichyl-phosphate-mannose--protein mannosyltransferase 7	Q06644	1.05628	0.16973	40	7	0.0789903
Methionine aminopeptidase 2	P38174	1.05621	0.115436	26	9	0.0788944
Down-regulator of invasive growth 2	P23292	1.05621	0.05846	19	12	0.078891
Protease B inhibitor 2	P0CT04	1.05612	0.528366	1	1	0.078774
Ubiquitin-conjugating enzyme E2 7	Q02159	1.05601	0.432673	7	4	0.0786268
Protein LIN1	P38852	1.05597	0.0914004	22	7	0.0785645
Vacuolar protein sorting-associated protein 4	P52917	1.05573	0.0891952	23	7	0.0782439
Uncharacterized isomerase YHR210C	P38893	1.05554	0.677299	5	3	0.0779807
Transcription factor IIIA	P39933	1.05553	0.34242	32	10	0.0779664
DNA polymerase epsilon subunit B	P24482	1.05552	0.0526136	105	12	0.0779521
Uncharacterized oxidoreductase YKL107W	P34251	1.05546	0.203808	22	7	0.0778655
Pre-rRNA-processing protein ESF2	P53743	1.05532	0.180086	18	8	0.0776753
Tricalbin-3	Q03640	1.05531	0.0481655	49	19	0.0776704
Aminopeptidase Y	P37302	1.05531	0.248995	30	1	0.0776651
ADP,ATP carrier protein 2	P18239	1.05528	0.431047	39	7	0.0776223
DNA polymerase alpha-binding protein	Q01454	1.05525	0.194232	24	9	0.0775904
Delta(7)-sterol 5(6)-desaturase	P32353	1.05519	0.214245	17	7	0.0775047
tRNA-splicing endonuclease subunit SEN54	Q02825	1.05519	0.232688	55	9	0.0775028
RNA-binding protein NAB6	Q03735	1.05504	0.296399	72	15	0.0772937
5-aminolevulinate synthase, mitochondrial	P09950	1.05491	0.233555	30	12	0.0771224
Translation machinery-associated protein 46	Q12000	1.05479	0.288405	22	7	0.076955
Uncharacterized protein YOL131W	Q08270	1.05479	0.142034	7	4	0.0769512
Uncharacterized ABC transporter ATP-binding protein YDR061W	Q12298	1.05473	0.197884	38	8	0.0768708
Cruciform cutting endonuclease 1, mitochondrial	Q03702	1.05468	0.32634	12	7	0.0768042
U3 small nucleolar RNA-associated protein 22	P53254	1.05465	0.227649	43	16	0.0767645
SVF1-like protein YDR222W	Q04925	1.05464	0.342396	23	8	0.0767474
Probable E3 ubiquitin-protein ligase HUL5	P53119	1.05462	0.356301	73	20	0.0767204
General amino-acid permease GAP1	P19145	1.0546	0.555274	13	7	0.0766909
Putative uncharacterized protein YDR396W	O13522	1.05459	0.335527	2	1	0.0766814
MHF histone-fold complex subunit 1	Q3E835	1.05456	0.5313	1	1	0.0766474
37S ribosomal protein S9, mitochondrial	P38120	1.05451	0.314208	18	10	0.0765692
ATPase GET3	Q12154	1.05441	0.365725	8	2	0.0764378
Pantothenate transporter FEN2	P25621	1.05427	0.240605	7	5	0.07624
Proliferating cell nuclear antigen	P15873	1.05416	0.176863	17	1	0.0760977
GTP-binding protein GTR1	Q00582	1.05407	0.31528	8	5	0.0759705
Peroxisome assembly protein 12	Q04370	1.05396	0.407428	37	4	0.0758257
Putative uncharacterized protein YOR366W	Q08872	1.05392	0.495373	5	1	0.0757694
Cytochrome b mRNA maturase bI3	Q9ZZW7	1.05389	0.0489926	37	11	0.0757275
Target of rapamycin complex 2 subunit BIT61	P47041	1.0538	0.194231	26	10	0.0756024
Alcohol-sensitive RING finger protein 1	Q06834	1.05379	0.536168	14	7	0.0755821
Transcription initiation factor TFIID subunit 4	P50105	1.05369	0.493405	10	5	0.0754498
Protein arginine N-methyltransferase 1	P38074	1.05364	0.42502	17	2	0.0753816
Kexin	P13134	1.05359	0.151206	78	15	0.0753193
Inner membrane assembly complex subunit 22	P40576	1.05351	0.221792	35	12	0.0752013
Uncharacterized protein YIL055C	P40523	1.05349	0.0918761	42	9	0.075179
UDP-N-acetylglucosamine transferase subunit ALG13	P53178	1.05349	0.517494	3	1	0.0751743
Ethanolamine-phosphate cytidylyltransferase	P33412	1.05343	0.171108	28	9	0.0750882
Uncharacterized mitochondrial hydrolase FMP41	P53889	1.05337	0.10371	21	6	0.0750103
Serine/threonine-protein kinase TOR2	P32600	1.05334	0.0455371	260	42	0.0749715
Putative cyclin-dependent kinase inhibitor SPL2	P38839	1.05334	0.0792857	11	5	0.0749671
Serine/threonine-protein kinase PKH1	Q03407	1.05317	0.0211219	53	9	0.0747402
MIOREX complex component 9	Q07349	1.05316	0.113502	23	10	0.0747258
Probable metalloprotease ARX1	Q03862	1.05306	0.169471	11	5	0.0745906
Histone deacetylase HOS1	Q12214	1.05302	0.0336869	49	7	0.0745346
RNA polymerase II holoenzyme cyclin-like subunit	P47821	1.05292	0.0448685	57	4	0.0743987
Protein STB1	P42845	1.05277	0.417477	19	6	0.0741889
Vacuolar amino acid transporter 6	P40074	1.05273	0.446514	13	2	0.0741294
Protein AIR1	P40507	1.05267	0.28313	153	8	0.0740571
tRNA (guanine-N(7)-)-methyltransferase non-catalytic subunit TRM82	Q03774	1.05262	0.146204	24	7	0.0739823
Uncharacterized protein YPL067C	Q02754	1.05261	0.0123283	35	8	0.073966
Mitochondrial import inner membrane translocase subunit TIM22	Q12328	1.05258	0.170331	12	1	0.0739259
Vacuolar membrane protein PEP3	P27801	1.0525	0.539031	123	17	0.073825
Uncharacterized protein YHR097C	P38809	1.05248	0.0119972	17	6	0.0737963
Regulatory protein MIG2	P53035	1.05242	0.313378	14	5	0.0737137
Peroxiredoxin DOT5	P40553	1.0524	0.0117854	14	4	0.073683
Uncharacterized protein YGL041W-A, mitochondrial	P0C5N3	1.05238	0.233222	2	2	0.0736588
Serine hydroxymethyltransferase, mitochondrial	P37292	1.05236	0.0591286	18	2	0.0736294
Meiotic recombination protein DMC1	P25453	1.05236	0.345038	7	4	0.0736248
Uncharacterized peptidase YFR006W	P43590	1.05231	0.148368	19	9	0.073557
Putative aryl-alcohol dehydrogenase AAD16	Q02895	1.05208	0.656122	14	4	0.0732385
Uracil catabolism protein 2	Q04411	1.05202	0.136504	26	14	0.073156
Uncharacterized protein YDR124W	Q04608	1.05194	0.324766	9	6	0.0730532
Protein transport protein TIP20	P33891	1.05179	0.312497	57	11	0.0728458
Uncharacterized endoplasmic reticulum membrane protein YGL010W	P25338	1.05179	0.323524	103	2	0.0728406
Ribosome biogenesis protein RLP7	P40693	1.05172	0.445502	7	6	0.0727526
SIR4-interacting protein SIF2	P38262	1.05171	0.424663	16	4	0.0727363
Probable aminopeptidase YDR415C	Q04033	1.0517	0.314979	26	4	0.0727293
Proline-specific permease	P15380	1.05168	0.479952	2	1	0.0726974
Actin-related protein 3	P47117	1.05165	0.24722	165	25	0.0726511
DNA repair/transcription protein MET18/MMS19	P40469	1.05162	0.306532	24	9	0.0726186
Basic amino-acid permease	P38971	1.0516	0.168618	2	2	0.0725854
Probable diacetyl reductase [(R)-acetoin forming] 2	P39713	1.05157	0.412558	24	7	0.072547
Ribosome assembly protein 4	P25382	1.05155	0.448045	34	9	0.072514
Anaphase-promoting complex subunit CDC23	P16522	1.05153	0.56853	15	6	0.0724868
Peroxisomal-coenzyme A synthetase	P38137	1.0515	0.542099	14	5	0.0724476
Fork head protein homolog 1	P40466	1.05143	0.249171	13	8	0.0723573
Protein SSP120	P39931	1.05142	0.395435	45	11	0.0723345
Aspartic proteinase yapsin-6	P40583	1.0513	0.386996	1	1	0.0721698
DNA primase small subunit	P10363	1.05118	0.312124	14	7	0.0720132
Beta-1,6-glucan synthesis-associated protein KEG1	P43614	1.0511	0.574851	12	1	0.0719062
Antisense of depressing factor protein 1	Q2V2Q1	1.05108	0.214204	5	2	0.071878
Cap-associated protein CAF20	P12962	1.05104	0.509941	2	2	0.0718146
ATP-dependent RNA helicase SUV3, mitochondrial	P32580	1.05082	0.184423	47	11	0.0715158
Uncharacterized transcriptional regulatory protein YKL222C	P35995	1.05077	0.717726	16	7	0.0714489
54S ribosomal protein L8, mitochondrial	P22353	1.05075	0.541365	8	4	0.0714209
37S ribosomal protein NAM9, mitochondrial	P27929	1.0507	0.0277009	35	12	0.0713468
Protein SNQ2	P32568	1.05067	0.121591	59	14	0.071308
DNA repair protein RAD1	P06777	1.05062	0.123239	30	16	0.0712476
DNA ligase 4	Q08387	1.05059	0.363098	28	14	0.0712018
40S ribosomal protein S22-A	P0C0W1	1.05057	0.495163	14	5	0.0711704
Membrane-anchored lipid-binding protein LAM6	Q08001	1.05054	0.0511799	77	8	0.0711294
Protein FAF1	P40546	1.0504	0.565299	16	6	0.0709456
Ribosome biogenesis protein SSF1	P38789	1.05035	0.409912	25	13	0.0708765
Protein SDA1	P53313	1.05025	0.118321	51	8	0.0707329
Hsp90 co-chaperone Cdc37	P06101	1.05022	0.126043	16	10	0.0706931
Translation machinery-associated protein 7	Q3E764	1.05018	0.544348	2	2	0.0706344
DNA replication complex GINS protein PSF3	Q12146	1.05016	0.459402	16	5	0.070612
Serine/threonine-protein kinase RCK2	P38623	1.05	0.438824	39	10	0.0703885
Proline-rich protein LAS17	Q12446	1.04995	0.0630304	14	7	0.0703164
Putative uncharacterized protein YOR139C	Q08532	1.04993	0.489494	8	2	0.0702907
WD repeat-containing protein YMR102C	Q03177	1.04991	0.0826087	82	13	0.0702711
Protein transport protein SEC24	P40482	1.0499	0.536237	37	1	0.0702562
Protein BCP1	Q06338	1.04978	0.155714	25	5	0.0700913
rRNA-processing protein FCF1	Q05498	1.0497	0.520906	16	5	0.0699827
Translation machinery-associated protein 64	Q04600	1.04964	0.103798	192	57	0.0698997
Ubiquitin ligase-binding protein BUL2	Q03758	1.04964	0.0033382	96	17	0.0698915
Phospholipid:diacylglycerol acyltransferase	P40345	1.04963	0.146817	71	12	0.0698843
Putative uncharacterized protein YLR031W	Q07978	1.04951	0.415566	3	2	0.0697155
Inhibitory regulator protein IRA2	P19158	1.04951	0.0664735	143	43	0.0697114
DNA replication fork-blocking protein FOB1	O13329	1.04946	0.0538171	23	11	0.0696478
Structural maintenance of chromosomes protein 5	Q08204	1.04935	0.0122029	50	21	0.0694933
Phosphatase PSR1	Q07800	1.0493	0.609473	9	9	0.0694243
Phosphoribosylaminoimidazole carboxylase	P53115	1.04927	0.227701	91	34	0.0693815
Methionyl-tRNA formyltransferase, mitochondrial	P32785	1.04917	0.466711	25	6	0.0692501
Probable NADPH:adrenodoxin oxidoreductase, mitochondrial	P48360	1.04916	0.26216	124	19	0.0692301
Protein DOM34	P33309	1.04913	0.337902	43	13	0.0691958
Protein disulfide-isomerase	P17967	1.04911	0.321198	38	2	0.0691663
Diphthine methyltransferase	P38332	1.0491	0.527767	4	3	0.0691474
ADP-ribosylation factor GTPase-activating protein GCS1	P35197	1.04906	0.092017	50	5	0.0691011
Uncharacterized protein YBR225W	P38321	1.04897	0.187913	26	13	0.0689785
Putative guanine nucleotide-exchange factor SED4	P25365	1.04894	0.0344332	38	9	0.0689387
Diphthine--ammonia ligase	Q12429	1.04894	0.365246	11	8	0.068932
Vacuolar protein sorting-associated protein 16	Q03308	1.04879	0.411206	51	12	0.0687314
Lysophospholipase 3	Q08108	1.04877	0.753754	4	3	0.0686983
Uncharacterized protein YJR111C	P47148	1.04872	0.424135	32	4	0.0686362
Putative uncharacterized protein YDR327W	P87288	1.04872	0.731335	2	1	0.0686238
Endoplasmic oxidoreductin-1	Q03103	1.04871	0.492302	43	9	0.0686222
Halotolerance protein 9	Q12180	1.04859	0.119716	21	7	0.0684505
DNA replication licensing factor MCM3	P24279	1.04848	0.0407293	16	10	0.0682953
Protein NIP100	P33420	1.04847	0.152766	31	14	0.0682883
Protein SFI1	Q12369	1.04844	0.378162	152	36	0.068244
Putative reductase 1	Q12458	1.04839	0.578024	9	6	0.0681777
Mitogen-activated protein kinase KSS1	P14681	1.04824	0.141838	6	3	0.0679665
Intron-encoded endonuclease I-SceI	P03882	1.04821	0.368577	64	4	0.0679325
DNA mismatch repair protein MLH3	Q12083	1.04821	0.0792965	43	6	0.0679314
Amino-acid acetyltransferase, mitochondrial	P40360	1.04817	0.321151	20	10	0.0678719
Uncharacterized protein YGR273C	P53329	1.04815	0.408933	21	5	0.06784
DNA repair protein REV1	P12689	1.04807	0.0638817	179	15	0.067736
GLC7-interacting protein 2	P40036	1.04803	0.218639	75	16	0.0676813
Lactoylglutathione lyase	P50107	1.04794	0.184844	109	9	0.0675629
Guanine nucleotide exchange factor subunit RGP1	P16664	1.04794	0.358634	23	9	0.0675595
GDP-Man:Man(3)GlcNAc(2)-PP-Dol alpha-1,2-mannosyltransferase	P53954	1.04794	0.100266	36	15	0.0675551
60S ribosomal protein L23-A	P0CX41	1.04789	0.588646	9	2	0.0674837
Central kinetochore subunit NKP1	Q12493	1.04767	0.397425	11	3	0.0671876
Putative uncharacterized protein YCR022C	P25620	1.04764	0.28357	5	4	0.0671383
Mitochondrial presequence protease	P32898	1.04749	0.287168	44	12	0.0669385
Putative uncharacterized protein YOR364W	Q08842	1.04749	0.624336	7	3	0.0669362
Restriction of telomere capping protein 3	P38804	1.04727	0.733879	12	2	0.0666399
Putative uncharacterized protein YKL111C	P36074	1.04719	0.693037	2	2	0.0665262
Polynucleotide 5'-hydroxyl-kinase GRC3	Q07845	1.04713	0.50442	23	10	0.0664384
Lariat debranching enzyme	P24309	1.04709	0.514398	10	8	0.0663815
Trans-aconitate 3-methyltransferase	P32643	1.04706	0.0238728	26	7	0.0663485
Spindle pole component BBP1	Q12365	1.04706	0.578268	14	7	0.066345
Imidazole glycerol phosphate synthase hisHF	P33734	1.04699	0.345178	21	9	0.0662409
Autophagy-related protein 3	P40344	1.04695	0.473315	3	3	0.0661931
Transcription activator MSS11	Q03825	1.04681	0.292358	13	3	0.0659951
Lysophospholipase 2	Q03674	1.04678	0.285607	42	4	0.0659574
DNA-directed RNA polymerase I subunit RPA34	P47006	1.04672	0.210893	13	6	0.0658754
Ubiquitin-activating enzyme E1-like	P52488	1.04671	0.404247	46	7	0.0658601
Putative zinc metalloprotease TRE2	Q08693	1.0467	0.110483	21	7	0.0658434
Protein MSO1	P53604	1.0466	0.644071	2	2	0.0657086
Coatomer subunit beta	P41810	1.04659	0.344943	43	13	0.0656977
tRNA wybutosine-synthesizing protein 4	Q08282	1.04653	0.71841	40	10	0.065609
F-box protein COS111	P38308	1.04652	0.46185	73	17	0.0656047
Valine amino-acid permease	P41815	1.04652	0.127065	11	8	0.0655974
LAS seventeen-binding protein 3	P43603	1.04652	0.548787	28	5	0.0655946
Uncharacterized protein YLR358C	O13565	1.04642	0.212771	7	4	0.0654687
RNA exonuclease 3	Q12090	1.04632	0.335189	11	7	0.0653275
Exocyst complex component SEC15	P22224	1.04629	0.33637	21	10	0.0652794
Lipoyl synthase, mitochondrial	P32875	1.04622	0.406074	41	7	0.0651844
Putative uncharacterized protein YER158W-A	Q8TGR3	1.04585	0.642289	31	2	0.0646735
Peroxisomal long-chain fatty acid import protein 2	P41909	1.04574	0.135984	48	17	0.0645223
Stationary phase protein 4	Q04438	1.04561	0.446809	2	2	0.0643465
Uncharacterized transcriptional regulatory protein YLL054C	Q12244	1.04553	0.259407	58	16	0.0642284
Replication factor C subunit 2	P40348	1.0455	0.45107	18	6	0.0641884
Uncharacterized vacuolar membrane protein YJR054W	P47114	1.04547	0.233887	71	5	0.0641525
Pentamidine resistance factor, mitochondrial	P38969	1.04545	0.454409	23	8	0.0641267
GPI ethanolamine phosphate transferase 1	P36051	1.04543	0.368541	19	7	0.0641009
F-box protein HRT3	Q12347	1.04543	0.37487	15	6	0.0640948
Sterol O-acyltransferase 1	P25628	1.04539	0.654737	10	6	0.0640429
Putative cystathionine gamma-synthase YLL058W	Q12198	1.04539	0.162781	54	8	0.0640417
E3 ubiquitin-protein ligase complex SLX5-SLX8 subunit SLX8	P40072	1.04531	0.570102	2	2	0.0639367
Histone demethylase JHD2	P47156	1.04524	0.238626	9	6	0.0638303
Grand meiotic recombination cluster protein 2	Q06201	1.04518	0.183142	11	5	0.0637486
Lysophospholipase 1	P39105	1.04513	0.474857	7	2	0.0636888
MutS protein homolog 4	P40965	1.0451	0.272256	18	11	0.0636355
Protein STU2	P46675	1.04508	0.477301	27	13	0.063619
Anthranilate phosphoribosyltransferase	P07285	1.04503	0.25971	9	4	0.0635395
Nucleoporin SEH1	P53011	1.04502	0.592972	41	4	0.063534
Peptidyl-prolyl cis-trans isomerase CYP7	P47103	1.04495	0.0362174	67	11	0.0634362
Endosomal protein P24B	P32803	1.04492	0.624551	13	1	0.0633992
Chromatin structure-remodeling complex protein RSC8	P43609	1.04492	0.550755	12	6	0.0633878
Sigma-like sequence protein 1, mitochondrial	P42900	1.04488	0.375274	23	10	0.0633339
Putative methyltransferase YGR283C	P53336	1.04487	0.142975	8	2	0.0633297
Tubulin beta chain	P02557	1.04479	0.579081	24	6	0.0632119
Leucine carboxyl methyltransferase 1	Q04081	1.04466	0.0804391	5	3	0.0630367
Casein kinase I homolog 1	P23291	1.04464	0.378995	10	6	0.0630008
5-oxoprolinase	P28273	1.04461	0.349734	117	21	0.062969
Uncharacterized protein YMR315W	Q04869	1.04451	0.807044	6	2	0.0628287
Mitochondrial import inner membrane translocase subunit TIM14	Q07914	1.0445	0.136681	10	4	0.0628096
Neutral trehalase	P32356	1.0445	0.448645	36	13	0.0628058
2-dehydropantoate 2-reductase	P38787	1.04448	0.313801	6	4	0.0627911
DNA repair and recombination protein RAD52	P06778	1.04447	0.311509	18	7	0.0627687
Uncharacterized protein YDR179W-A	Q03983	1.04442	0.186345	10	7	0.0627089
Putative uncharacterized protein YMR075C-A	Q6B0Y7	1.04439	0.343252	20	2	0.0626539
Chitin synthase 2	P14180	1.04426	0.160471	36	20	0.0624791
Methionine aminopeptidase 1	Q01662	1.04423	0.460866	14	1	0.0624444
Putative uncharacterized protein YMR135W-A	Q6B0X1	1.04421	0.693957	4	2	0.062413
Actin-related protein 5	P53946	1.04419	0.0326461	57	11	0.0623864
Protein EBS1	Q03466	1.04417	0.51402	25	8	0.0623557
54S ribosomal protein L11, mitochondrial	P36521	1.04416	0.179471	32	7	0.0623418
ATPase synthesis protein 25, mitochondrial	Q03153	1.04405	0.519793	45	12	0.0621946
Chromatin modification-related protein EAF6	P47128	1.04402	0.426337	10	5	0.0621561
Cell division control protein 7	P06243	1.04402	0.591305	22	9	0.0621515
E3 ubiquitin-protein ligase UBR1	P19812	1.04391	0.0665045	102	27	0.0619917
Regulatory protein LEU3	P08638	1.04363	0.167188	14	9	0.0616077
Cytochrome c mitochondrial import factor CYC2	P38909	1.04357	0.231871	38	9	0.0615297
Nuclear envelope morphology protein 1	P38757	1.04351	0.242655	17	8	0.0614485
Citrate synthase 3, mitochondrial	P43635	1.0435	0.0303104	38	13	0.0614324
Nucleoporin NIC96	P34077	1.04348	0.515132	22	12	0.0613974
Histone-lysine N-methyltransferase, H3 lysine-79 specific	Q04089	1.04345	0.586528	14	8	0.0613679
Arrestin-related trafficking adapter 3	P47029	1.04321	0.0307141	26	10	0.0610309
Zinc finger protein STP4	Q07351	1.04318	0.316636	38	6	0.060992
Protein MUM3	Q08750	1.04317	0.233984	12	6	0.0609758
CWF19-like protein DRN1	P53255	1.04314	0.57398	103	5	0.0609396
Protein TOS4	Q06266	1.04305	0.0252945	82	13	0.0608058
Kinetochore protein SPC25	P40014	1.04301	0.203946	21	4	0.0607481
E3 ubiquitin-protein ligase SNT2	P53127	1.04296	0.183255	192	42	0.0606785
Zinc-regulated transporter 3	P34240	1.04292	0.38445	5	2	0.0606351
RNA end formation protein 2	P42073	1.04284	0.304756	33	15	0.0605196
Uncharacterized protein YKL018C-A	Q3E7A7	1.04284	0.754314	4	1	0.060516
Protein STN1	P38960	1.04282	0.426306	56	7	0.0604875
Cytochrome b	P00163	1.0428	0.210082	3	3	0.0604649
Sphingoid long chain base kinase 5	Q06147	1.04278	0.216576	22	12	0.0604359
DNA replication licensing factor MCM7	P38132	1.04276	0.583634	13	10	0.0604018
Early meiotic induction protein 1	Q04406	1.04275	0.365206	14	4	0.0603914
Resistance to glucose repression protein 1	Q00816	1.04266	0.362486	27	15	0.0602668
Protein SCM3	Q12334	1.0426	0.189175	2	2	0.0601814
Box C/D snoRNA protein 1	P38772	1.04257	0.713364	18	9	0.060145
54S ribosomal protein L32, mitochondrial	P25348	1.04255	0.533882	9	4	0.0601127
Vacuolar protein sorting-associated protein 72	Q03388	1.04254	0.157761	23	10	0.0601021
Lysine--tRNA ligase, mitochondrial	P32048	1.04249	0.0713302	17	9	0.0600346
Ammonia transport outward protein 2	P32907	1.04248	0.53905	3	1	0.0600243
Serine--tRNA ligase, cytoplasmic	P07284	1.04248	0.0714728	34	9	0.0600204
tRNA N6-adenosine threonylcarbamoyltransferase	P36132	1.0424	0.232264	18	6	0.0599143
Uncharacterized membrane protein YLR326W	Q06170	1.04233	0.0554439	32	4	0.0598145
ATPase-stabilizing factor 15 kDa protein	P16965	1.04225	0.612131	8	4	0.0597034
Bud site selection protein 14	P27637	1.04223	0.203532	28	8	0.0596806
Exosome complex component RRP43	P25359	1.04215	0.523668	7	4	0.0595628
Uncharacterized protein YLR283W, mitochondrial	Q05867	1.04215	0.252295	18	6	0.0595626
Trehalose-phosphatase	P31688	1.04215	0.333654	166	13	0.0595571
Metal homeostasis factor ATX2	Q12067	1.04209	0.53129	7	3	0.0594839
Uncharacterized protein YBR255C-A	Q3E776	1.04191	0.346778	8	5	0.0592296
Central kinetochore subunit OKP1	P53298	1.04184	0.017781	66	26	0.0591365
Radiation-sensitive protein 28	Q12021	1.04176	0.153105	20	8	0.0590275
Activator of stress genes 1	P40467	1.04171	0.408609	72	9	0.0589562
Cerevisin	P09232	1.04165	0.380736	130	13	0.0588684
T-complex protein 1 subunit beta	P39076	1.04161	0.42815	18	2	0.0588086
Glucose-signaling factor 2	Q04697	1.04159	0.830551	37	1	0.0587935
Nucleoporin NUP53	Q03790	1.04158	0.441996	23	11	0.058772
DNA repair protein XRS2	P33301	1.04154	0.363785	40	9	0.0587185
CTP synthase 2	P38627	1.04154	0.43934	98	12	0.0587127
Probable ATP-dependent RNA helicase DHR1	Q04217	1.04152	0.0487791	87	23	0.0586898
Histidine biosynthesis trifunctional protein	P00815	1.04145	0.105733	22	1	0.0585957
Carboxypeptidase S	P27614	1.04142	0.158069	31	9	0.0585585
Chitin synthase 3	P29465	1.04136	0.467722	47	13	0.0584738
Prefoldin subunit 3	P48363	1.04135	0.287261	25	6	0.0584505
Tethering factor for nuclear proteasome STS1	P38637	1.04132	0.591055	5	2	0.0584157
Tricarboxylate transport protein	P38152	1.0413	0.287244	7	4	0.0583842
Protein yippee-like MOH1	P38191	1.04127	0.610693	6	4	0.0583452
rRNA-processing protein EFG1	Q3E705	1.04121	0.467446	10	3	0.0582578
Putative alanyl-tRNA editing protein alaX	P53960	1.04119	0.0515678	24	4	0.05823
UDP-N-acetylglucosamine pyrophosphorylase	P43123	1.04118	0.540154	14	7	0.0582128
GTPase-activating protein GYP1	Q08484	1.04113	0.111048	25	8	0.0581508
Nucleoporin NUP57	P48837	1.04104	0.114414	21	7	0.0580206
Diphosphoinositol polyphosphate phosphohydrolase DDP1	Q99321	1.041	0.0109541	121	5	0.0579718
Adenylyl cyclase-associated protein	P17555	1.041	0.361925	50	7	0.0579659
Homocitrate synthase, mitochondrial	Q12122	1.04098	0.280762	49	8	0.0579432
Ubiquitin-like-specific protease 1	Q02724	1.04097	0.0624146	86	18	0.0579309
Pentafunctional AROM polypeptide	P08566	1.04093	0.118733	90	3	0.0578672
Cell division control protein 45	Q08032	1.04091	0.68075	10	4	0.0578458
Peroxisomal membrane protein import receptor PEX19	Q07418	1.04088	0.386262	15	5	0.0577992
Uncharacterized protein YMR196W	Q04336	1.04075	0.135918	172	12	0.0576298
Dihydrofolate synthetase	Q12676	1.0407	0.47196	27	6	0.0575511
DNA topoisomerase 2-associated protein PAT1	P25644	1.04069	0.733981	16	6	0.0575444
Replication factor C subunit 1	P38630	1.04068	0.103277	25	14	0.0575208
Putative uncharacterized protein YML101C-A	Q6B0Z2	1.04066	0.687612	7	2	0.0574958
F-box protein YDR306C	Q06640	1.04066	0.254655	26	7	0.0574953
Class E vacuolar protein-sorting machinery protein HSE1	P38753	1.04062	0.229024	31	10	0.0574481
Actin-interacting protein 1	P46680	1.0406	0.157354	127	13	0.0574152
S-phase entry cyclin-5	P30283	1.04056	0.0294524	15	5	0.0573615
Uncharacterized protein YGR042W	P53227	1.04051	0.258967	49	9	0.0572872
Acetyl-CoA carboxylase, mitochondrial	P32874	1.04049	0.098377	123	45	0.0572575
S-adenosyl-L-methionine-dependent tRNA 4-demethylwyosine synthase	Q08960	1.04041	0.268039	48	19	0.0571556
Protein ERP3	Q12403	1.04019	0.386134	2	2	0.0568465
Elongator complex protein 3	Q02908	1.04019	0.659509	35	8	0.0568435
Serine/threonine-protein phosphatase 4 regulatory subunit 2	P38193	1.04016	0.204696	9	5	0.0568114
Azole resistance protein 1	P50080	1.04015	0.630442	25	2	0.0567947
mRNA 3'-end-processing protein YTH1	Q06102	1.04008	0.16206	37	9	0.0567012
Cell cycle arrest protein BUB3	P26449	1.04	0.731161	2	2	0.0565848
Serine/threonine-protein phosphatase 4 catalytic subunit	P32345	1.03996	0.404285	7	4	0.056528
Beta-glucosidase-like protein NCA3, mitochondrial	P46955	1.03996	0.539619	21	2	0.0565241
V-type proton ATPase subunit d	P32366	1.03995	0.110086	25	2	0.0565205
Uncharacterized protein YPL245W	Q12179	1.03995	0.463817	146	10	0.0565074
Putative uncharacterized protein YER091C-A	Q02590	1.03992	0.898472	1	1	0.0564666
Uncharacterized glycosyl hydrolase YBR056W	P38081	1.03979	0.109436	90	10	0.0562923
60S ribosomal protein L1-A	P0CX43	1.03977	0.304039	139	103	0.0562626
Protein-lysine N-methyltransferase EFM6	P53970	1.03976	0.514318	136	5	0.0562464
CUE domain-containing protein 3	P53137	1.03974	0.401147	9	8	0.0562277
Peroxisomal hydratase-dehydrogenase-epimerase	Q02207	1.03974	0.252671	29	13	0.0562259
Probable oxidoreductase ENV9	Q08651	1.03974	0.285813	21	3	0.056216
Putative cystathionine gamma-synthase YML082W	Q04533	1.03968	0.809706	18	9	0.0561423
Autophagy-related protein 13	Q06628	1.03965	0.231866	13	8	0.0561009
Putative transcriptional activator MSA2	P36157	1.03958	0.783109	3	2	0.0559961
Putative uncharacterized protein YKL102C	P34249	1.03942	0.613631	3	3	0.0557839
Pre-mRNA leakage protein 1	Q07930	1.03938	0.260602	10	5	0.0557284
U3 small nucleolar RNA-associated protein 11	P34247	1.03935	0.0435054	166	44	0.0556885
Recyclin-1	P39531	1.03935	0.0955403	28	14	0.0556827
Leu/Val/Ile amino-acid permease	P38084	1.03935	0.184662	13	9	0.0556793
Allantoinase	P32375	1.03931	0.220162	13	5	0.0556268
Autophagy-related protein 27	P46989	1.03921	0.620374	13	2	0.055484
Uncharacterized protein YBR090C	P38253	1.03916	0.388426	8	5	0.0554109
Nucleoporin NUP188	P52593	1.03913	0.0815952	64	21	0.0553753
Uncharacterized protein YMR160W	Q03823	1.03899	0.0532409	40	12	0.0551782
Pre-mRNA-splicing factor SPP381	P38282	1.03898	0.175172	83	10	0.0551697
tRNA dimethylallyltransferase, mitochondrial	P07884	1.03875	0.720096	24	8	0.0548492
E4 ubiquitin-protein ligase UFD2	P54860	1.03865	0.0100353	86	16	0.0547091
Pyridoxamine 5'-phosphate oxidase homolog	Q06608	1.03864	0.409125	21	6	0.0546914
Sporulation-specific protein 12	P17123	1.03859	0.552894	9	5	0.0546229
Putative uncharacterized protein YGR064W	P53240	1.03856	0.76096	2	2	0.0545792
Ribosomal RNA-processing protein 9	Q06506	1.03855	0.081162	23	8	0.0545662
37S ribosomal protein S25, mitochondrial	P40496	1.03852	0.389661	13	2	0.0545311
Peroxisomal ATPase PEX1	P24004	1.03849	0.174323	44	15	0.0544841
IMP-specific 5'-nucleotidase 1	Q99312	1.03847	0.283632	35	6	0.0544662
Probable mitochondrial transport protein FSF1	Q12029	1.03845	0.313608	4	4	0.054433
37S ribosomal protein S5, mitochondrial	P33759	1.0384	0.286056	12	6	0.0543669
Killer toxin-resistance protein 5	P22023	1.03837	0.0515759	26	13	0.0543167
Ubiquitin fusion degradation protein 4	P33202	1.03817	0.336428	76	19	0.0540471
Transcriptional regulatory protein DEP1	P31385	1.03815	0.49568	24	7	0.0540158
RNA polymerase II degradation factor 1	P35732	1.03812	0.283315	18	10	0.0539724
GPI mannosyltransferase 4	Q04174	1.03811	0.593704	13	4	0.0539576
Protein PET111, mitochondrial	P08468	1.03808	0.114997	24	12	0.0539229
12 kDa heat shock protein	P22943	1.03806	0.143037	10	6	0.0538908
MICOS complex subunit MIC12	P38341	1.03795	0.812698	2	2	0.0537439
Spindle pole body component SPC42	P36094	1.03794	0.596176	27	11	0.0537216
Anaphase-promoting complex subunit CDC16	P09798	1.03793	0.0322574	26	13	0.0537077
SWI5-dependent HO expression protein 4	P51534	1.0379	0.0794619	25	10	0.0536625
BTB/POZ domain-containing protein YLR108C	Q12259	1.03777	0.405865	54	12	0.0534922
Putative uncharacterized protein YDL034W	Q12448	1.03768	0.770219	22	5	0.0533576
Ribosome-releasing factor 2, mitochondrial	P39677	1.03763	0.652123	8	4	0.0532949
ATP-dependent rRNA helicase RRP3	P38712	1.03761	0.685261	10	4	0.0532675
Factor arrest protein 11	P53917	1.03756	0.100723	38	12	0.0532004
Chromatin-remodeling complexes subunit NGG1	P32494	1.03754	0.348667	23	15	0.0531622
Thiamine metabolism regulatory protein THI3	Q07471	1.03727	0.308713	29	5	0.052789
Vacuole morphology and inheritance protein 14	Q06708	1.03718	0.686507	30	10	0.052668
Protein SMY2	P32909	1.03715	0.165209	43	17	0.0526303
Flavin carrier protein 1	Q08967	1.0371	0.331544	13	9	0.0525521
Aspartic proteinase MKC7	P53379	1.03709	0.436866	3	1	0.0525427
Probable intramembrane protease YKL100C	P34248	1.03707	0.460323	18	6	0.0525125
Putative uncharacterized protein YNL179C	P53880	1.03704	0.663684	3	2	0.0524664
RNA polymerase-associated protein LEO1	P38439	1.03701	0.274854	18	4	0.0524236
Uncharacterized protein YDL144C	Q07589	1.037	0.519526	7	4	0.0524202
60S ribosomal protein L37-B	P51402	1.03696	0.649189	26	6	0.0523602
Siderophore iron transporter ARN1	P38731	1.0369	0.654157	5	4	0.0522739
Vacuolar protein sorting-associated protein 8	P39702	1.03688	0.392066	46	12	0.0522528
U3 small nucleolar RNA-associated protein 20	P35194	1.03684	0.316195	93	41	0.0521956
Aconitate hydratase, mitochondrial	P19414	1.03676	0.00485309	25	2	0.0520865
Putative uncharacterized protein YJR157W	P47184	1.03676	0.417308	3	3	0.0520833
Regulatory protein SWI6	P09959	1.03667	0.393968	10	3	0.0519621
Putative lipase YDR444W	Q04093	1.03666	0.271153	13	8	0.0519479
Transcriptional regulatory protein RXT2	P38255	1.03666	0.416023	14	6	0.0519439
tRNA modification GTPase MSS1, mitochondrial	P32559	1.03666	0.531509	37	10	0.0519383
DNA damage checkpoint control protein MEC3	Q02574	1.03665	0.257497	17	1	0.0519314
tRNA threonylcarbamoyladenosine dehydratase 2	P36101	1.03663	0.16161	12	7	0.051902
DER1-like family member protein 1	Q12743	1.03653	0.174133	12	8	0.051767
Rho-type GTPase-activating protein 2	Q06407	1.03652	0.42934	32	7	0.0517461
CDC48-associated ubiquitin-like/zinc finger protein 1	P53899	1.0365	0.0864763	12	6	0.0517137
Protein SIP4	P46954	1.0364	0.489126	21	8	0.0515777
Cell wall protein PRY3	P47033	1.03633	0.652157	3	3	0.0514879
Transcriptional activator protein UGA3	P26370	1.03631	0.557323	26	6	0.0514579
High-affinity glutamine permease	P48813	1.03631	0.396865	14	3	0.0514524
Branched-chain-amino-acid aminotransferase, mitochondrial	P38891	1.0363	0.396342	10	1	0.0514367
Leukotriene A-4 hydrolase homolog	Q10740	1.03624	0.116684	26	9	0.0513594
Putative uncharacterized protein YGL218W	P53084	1.0362	0.320016	5	4	0.0512958
Protein HES1	P35843	1.03615	0.429771	16	9	0.0512346
Nitrosoguanidine resistance protein SNG1	P46950	1.03606	0.533431	5	3	0.0511076
Probable serine/threonine-protein kinase RTK1	Q12100	1.03605	0.475838	9	4	0.0510982
ADP-ribose pyrophosphatase	Q01976	1.03601	0.439649	17	3	0.0510401
Putative uncharacterized protein YMR122C	Q03879	1.03601	0.419908	39	7	0.0510387
GTP-binding protein YPT7	P32939	1.03601	0.424088	13	3	0.0510379
SWI/SNF complex subunit SWI3	P32591	1.03597	0.44666	47	16	0.0509876
Serine/threonine-protein kinase HRK1	Q08732	1.03597	0.403731	37	13	0.050987
U3 small nucleolar RNA-associated protein 13	Q05946	1.03597	0.308612	28	8	0.0509774
Putative uncharacterized protein YJR037W	P47105	1.03593	0.80399	2	2	0.0509237
Protein TAR1	Q8TGM6	1.03592	0.346234	10	5	0.0509072
Exosome complex component SKI6	P46948	1.0359	0.69347	6	5	0.0508789
Phosducin-like protein 1	Q04004	1.03588	0.310247	7	4	0.0508578
Eukaryotic initiation factor 4F subunit p130	P39936	1.03577	0.341607	73	17	0.0507066
HD domain-containing protein YGL101W	P53144	1.03577	0.565237	11	6	0.0507001
Transcription factor IIIB 70 kDa subunit	P29056	1.03573	0.0935814	15	7	0.0506519
Retrograde regulation protein 2	P32608	1.0357	0.221865	43	6	0.0505993
Dynamin-related protein DNM1	P54861	1.03565	0.0674291	63	15	0.0505323
Tricalbin-2	P48231	1.03563	0.436557	46	19	0.0505075
Cold shock-induced protein TIR1	P10863	1.03556	0.598586	4	3	0.0504086
Mitochondrial inner membrane i-AAA protease supercomplex subunit YME1	P32795	1.03555	0.289208	54	17	0.0504041
Fatty acid synthase subunit beta	P07149	1.03552	0.285301	110	24	0.050357
3-hydroxyisobutyryl-CoA hydrolase, mitochondrial	P28817	1.03549	0.433726	22	8	0.0503135
Kinesin-like protein KIP1	P28742	1.03546	0.053282	96	22	0.0502661
Uncharacterized protein YBR072C-A	Q3E794	1.03544	0.741673	4	2	0.0502482
40S ribosomal protein S17-A	P02407	1.0354	0.61529	13	3	0.0501931
Intron-encoded DNA endonuclease aI5 beta	Q9ZZX0	1.03537	0.582973	48	6	0.0501483
Exocyst complex component SEC8	P32855	1.03536	0.461375	75	9	0.0501277
Uncharacterized glycosyl hydrolase YIR007W	P40566	1.03535	0.485796	47	7	0.0501197
Altered inheritance of mitochondria protein 23, mitochondrial	P47015	1.03535	0.388401	118	11	0.0501192
Uncharacterized protein YKR078W	P36158	1.03527	0.304852	71	16	0.0500065
Arrestin-related trafficking adapter 6	P36117	1.03527	0.522248	68	10	0.0500016
Nicotinamide riboside kinase	P53915	1.03521	0.737193	7	2	0.0499278
AP-1 complex subunit beta-1	P36000	1.03517	0.479173	90	21	0.0498676
Glucokinase-1	P17709	1.03515	0.613995	25	1	0.0498437
Ubiquitin-conjugating enzyme E2 2	P06104	1.03514	0.810088	2	2	0.0498269
Ubiquitin-conjugating enzyme E2-21 kDa	P29340	1.035	0.68025	6	2	0.0496284
40S ribosomal protein S25-B	P0C0T4	1.03496	0.676067	4	3	0.0495775
COX assembly mitochondrial protein 2	Q3E7A4	1.03486	0.703927	11	8	0.0494355
TEL2-interacting protein 2	P47168	1.03457	0.613817	26	7	0.0490246
CBK1 kinase activator protein MOB2	P43563	1.03456	0.276636	24	6	0.0490233
Probable oxidoreductase AIM17	P23180	1.03443	0.305166	27	8	0.0488354
Nucleolar protein SWM2	P40342	1.03441	0.277992	62	7	0.0488116
Putative protease AXL1	P40851	1.03441	0.1268	37	12	0.0488062
Putative uncharacterized protein YHR028W-A	A0A023PXE8	1.03436	0.71742	5	1	0.0487318
Cytochrome c oxidase polypeptide VIII, mitochondrial	P04039	1.03432	0.144363	16	3	0.0486895
Ribonucleotide reductase inhibitor protein SML1	Q04964	1.0343	0.244672	18	2	0.0486604
SWI/SNF global transcription activator complex subunit SWP82	P43554	1.03427	0.263825	34	13	0.0486108
Nucleoporin NSP1	P14907	1.03426	0.849467	38	5	0.0486032
Protein MPA43	P53583	1.03425	0.561549	26	7	0.0485827
Outer spore wall protein 2	Q12202	1.03415	0.530559	129	13	0.0484492
Sporulation-specific with a leucine zipper motif protein 1	P40167	1.03413	0.529991	4	4	0.0484164
Putative uncharacterized protein YDR491C	Q03418	1.03413	0.364631	96	6	0.0484137
Autophagy protein 5	Q12380	1.03408	0.695537	99	5	0.0483446
Ubiquitin fusion degradation protein 1	P53044	1.03406	0.51311	15	9	0.0483208
60S ribosomal protein L29	P05747	1.03406	0.655702	5	4	0.0483186
Protein BTN1	P47040	1.03403	0.368391	19	1	0.0482826
Kinesin-like protein KIP3	P53086	1.03401	0.329266	29	10	0.0482553
DNA damage-responsive transcriptional repressor RPH1	P39956	1.03382	0.664914	38	11	0.047988
3-isopropylmalate dehydrogenase	P04173	1.03375	0.502064	7	4	0.0478915
Protein ASI1	P54074	1.03372	0.47662	52	7	0.0478426
Probable phospholipid-transporting ATPase NEO1	P40527	1.0337	0.213012	36	11	0.0478206
Protein SUR7	P54003	1.03369	0.411838	17	2	0.0478021
RNA polymerase I-specific transcription initiation factor RRN6	P32786	1.03366	0.345043	56	13	0.0477614
Protein HRB1	P38922	1.03361	0.100124	14	6	0.0476859
Cytochrome c1 heme lyase	Q00873	1.0336	0.70555	56	8	0.0476763
Signal peptidase complex subunit SPC3	Q12133	1.03359	0.46364	11	4	0.0476642
Postreplication repair E3 ubiquitin-protein ligase RAD18	P10862	1.03358	0.665441	18	8	0.047654
Delta-1-pyrroline-5-carboxylate dehydrogenase, mitochondrial	P07275	1.03342	0.035897	12	4	0.0474274
Proline utilization trans-activator	P25502	1.03341	0.0733949	58	11	0.0474136
Eukaryotic translation initiation factor 3 subunit A	P38249	1.03338	0.128707	91	24	0.0473665
rRNA biogenesis protein RRP36	Q12481	1.03338	0.196499	140	12	0.0473647
Dethiobiotin synthetase	P53630	1.03326	0.713506	1	1	0.0472077
Origin recognition complex subunit 1	P54784	1.03316	0.0311655	109	19	0.0470632
Mitochondrial translation factor ATP22	P50273	1.03314	0.000348222	69	15	0.0470291
Protein SPT21	P35209	1.03312	0.148299	33	12	0.0470047
Mitochondrial dicarboxylate transporter	Q06143	1.03312	0.51085	26	9	0.0470011
Trafficking protein particle complex III-specific subunit 85	P46944	1.0331	0.407172	21	8	0.0469777
Na(+)/H(+) antiporter	Q99271	1.03307	0.591906	16	4	0.0469406
Bypass of stop codon protein 4	P53841	1.03301	0.484801	2	2	0.04685
Probable metabolite transport protein YFL040W	P43562	1.03299	0.508296	30	6	0.0468318
Protein kinase-like protein SCY1	P53009	1.03299	0.740067	32	10	0.0468194
Putative ATP-dependent helicase IRC3	Q06683	1.03297	0.16328	46	19	0.0467986
Regulator of drug sensitivity 1	P25611	1.03292	0.362138	22	7	0.0467216
GTP-binding protein RHO5	P53879	1.03291	0.404903	12	4	0.0467148
Glutamine-dependent NAD(+) synthetase	P38795	1.03287	0.417068	53	7	0.0466623
Dol-P-Man:Man(7)GlcNAc(2)-PP-Dol alpha-1,6-mannosyltransferase	P53730	1.03287	0.38349	27	12	0.0466597
Intracellular protein transport protein USO1	P25386	1.03287	0.138965	121	48	0.046657
SRR1-like protein BER1	Q06688	1.03281	0.094445	31	10	0.0465815
Suppressor of disruption of TFIIS	P53078	1.03275	0.593605	22	4	0.046485
FIT family protein SCS3	P53012	1.03273	0.472747	3	3	0.0464665
Ankyrin repeat-containing protein YIL001W	P40560	1.03273	0.0332231	22	5	0.0464563
Glycerol uptake protein 1	P53154	1.03272	0.289041	21	8	0.0464482
Structural maintenance of chromosomes protein 2	P38989	1.03266	0.235291	49	22	0.0463623
Protein TEX1	P53851	1.03263	0.366857	64	9	0.0463191
Transketolase 2	P33315	1.03253	0.187931	38	7	0.0461878
Sorting nexin MVP1	P40959	1.03251	0.574442	22	8	0.0461501
Uncharacterized protein YLL007C	Q07799	1.03246	0.599434	50	8	0.0460819
Iron-sulfur assembly protein 2	Q12425	1.03244	0.74766	7	3	0.0460617
Flocculation suppression protein	P20134	1.03242	0.476238	50	11	0.0460244
Autophagy-related protein 32	P40458	1.03241	0.679997	13	4	0.0460143
Uncharacterized membrane protein YGR026W	P53217	1.03237	0.0322747	30	7	0.0459545
H/ACA ribonucleoprotein complex subunit 4	P33322	1.03234	0.608943	11	2	0.0459155
37S ribosomal protein S18, mitochondrial	P42847	1.03202	0.0823298	32	4	0.0454674
Chitin synthase 1	P08004	1.03193	0.261339	45	19	0.0453444
Small nuclear ribonucleoprotein Sm D1	Q02260	1.03191	0.666324	8	2	0.0453119
ATP synthase subunit f, mitochondrial	Q06405	1.03184	0.505288	9	1	0.0452232
Protein PSP2	P50109	1.03183	0.0198712	38	17	0.04521
Protein SOK2	P53438	1.03182	0.400647	10	7	0.0451921
Mitochondrial division protein 1	P47025	1.03179	0.286364	21	10	0.0451491
Transcriptional regulatory protein ASH1	P34233	1.03176	0.214769	49	13	0.0451079
Protein PAM1	P37304	1.03174	0.495521	31	12	0.045073
Transcription initiation factor IIF subunit alpha	P41895	1.03173	0.403904	23	9	0.0450603
COMPASS component SPP1	Q03012	1.03168	0.507918	10	8	0.0449937
Putative uncharacterized protein YCR047W-A	Q8TGQ1	1.0316	0.0701688	3	2	0.044887
UPF0479 membrane protein YER190C-B	P0CL41	1.03159	0.512126	17	3	0.0448762
D-amino-acid N-acetyltransferase HPA3	P39979	1.03158	0.541504	47	4	0.0448525
Lipase 4	P36165	1.03151	0.29468	17	11	0.0447544
Checkpoint serine/threonine-protein kinase BUB1	P41695	1.03144	0.44184	11	8	0.0446662
60S ribosomal protein L24-A	P04449	1.03141	0.0709532	15	5	0.044623
Vacuolar basic amino acid transporter 2	P38358	1.03138	0.770132	11	2	0.0445786
Ribosome biogenesis protein ENP2	P48234	1.03132	0.641729	40	16	0.0444951
DNA-directed RNA polymerase III subunit RPC4	P25441	1.03118	0.440381	51	10	0.0442899
RNA polymerase II transcription factor B subunit 2	Q02939	1.03116	0.373992	29	8	0.0442671
Temperature shock-inducible protein 1	P27654	1.03114	0.530716	1	1	0.0442378
DNA topoisomerase 2	P06786	1.03108	0.2309	66	30	0.0441596
ATP-dependent RNA helicase MAK5	P38112	1.03102	0.42398	16	10	0.0440769
Rho GDP-dissociation inhibitor	Q12434	1.031	0.830974	4	4	0.0440488
40S ribosomal protein S26-A	P39938	1.03098	0.567972	2	1	0.0440195
Nucleolar protein NET1	P47035	1.03095	0.417949	37	15	0.0439796
Transcriptional regulator MET31	Q03081	1.03094	0.213176	15	8	0.0439673
Putative uncharacterized protein YBR131C-A	Q8TGQ5	1.0309	0.381764	7	1	0.0439077
Trehalose synthase complex regulatory subunit TSL1	P38427	1.0308	0.00622432	93	10	0.0437581
Oligosaccharide translocation protein RFT1	P38206	1.03078	0.554452	20	3	0.0437426
Cytosolic iron-sulfur protein assembly protein 1	Q05583	1.03076	0.818759	2	2	0.0437031
Protein TBF1	Q02457	1.03068	0.155991	12	9	0.0435919
Single-strand telomeric DNA-binding protein GBP2	P25555	1.03063	0.447913	15	10	0.0435293
Probable ATP-dependent RNA helicase DHR2	P36009	1.03063	0.324866	27	11	0.0435278
Uncharacterized membrane protein YPL257W	Q08974	1.03055	0.868044	4	1	0.043418
BNI1-related protein 1	P40450	1.03054	0.446601	54	23	0.0433992
Protein CRT10	Q08226	1.03052	0.370136	65	16	0.0433687
26S protease regulatory subunit 6B homolog	P33298	1.03051	0.476189	30	3	0.0433635
Mitochondrial import protein 1	Q08176	1.03047	0.767338	4	2	0.043307
Putative uncharacterized protein YCL021W-A	Q96VH3	1.03038	0.785428	5	4	0.0431766
tRNA pseudouridine synthase 4	P48567	1.03028	0.525303	27	6	0.043036
Nitrogen network kinase 1	P36003	1.03017	0.285914	95	19	0.0428759
Sensitive to high expression protein 9, mitochondrial	Q04172	1.03012	0.228867	41	9	0.0428089
DNA replication regulator SLD3	P53135	1.03009	0.56187	28	12	0.0427706
Uncharacterized protein YIL024C	P40543	1.03004	0.787684	9	4	0.0427066
UDP-N-acetylglucosamine transporter YEA4	P40004	1.03001	0.473576	17	4	0.04266
pH-response regulator protein palA/RIM20	Q12033	1.03	0.26618	20	8	0.0426504
Increasing suppression factor 1	P32488	1.03	0.6075	5	3	0.0426494
Superoxide dismutase [Mn], mitochondrial	P00447	1.02997	0.518666	19	5	0.042599
Protein PET122, mitochondrial	P10355	1.02994	0.682763	7	4	0.0425544
Regulation of enolase protein 1	P40893	1.02992	0.517008	13	1	0.0425306
Phosphatidylinositol transfer protein PDR16	P53860	1.02992	0.302681	158	16	0.0425257
Probable pyridoxal 5'-phosphate synthase subunit SNZ3	P43545	1.02984	0.246412	168	55	0.0424218
Putative uncharacterized protein YFL031C-A	Q8TGU3	1.02979	0.273744	3	2	0.0423509
Succinate dehydrogenase assembly factor 2, mitochondrial	Q08230	1.02973	0.565267	55	5	0.0422718
Uncharacterized protein YGL258W-A	Q3E740	1.02965	0.507294	3	1	0.0421549
Mitochondrial GTP/GDP carrier protein 1	P38988	1.02964	0.450928	59	7	0.0421366
Protein NBA1	Q08229	1.0296	0.559164	32	10	0.0420818
Vacuolar import and degradation protein 30	P53076	1.02959	0.524037	31	11	0.0420765
Cytosine deaminase	Q12178	1.02959	0.824671	73	4	0.0420637
Serine/threonine-protein kinase ELM1	P32801	1.02955	0.400089	12	8	0.0420183
Carnitine O-acetyltransferase YAT2	P40017	1.02954	0.499821	71	18	0.0420026
Hexose transporter HXT8	P40886	1.02949	0.365287	236	7	0.0419239
Guanine nucleotide exchange factor LTE1	P07866	1.02943	0.171619	55	24	0.041845
Protein TAX4	P47030	1.02932	0.682631	50	7	0.0416922
Tyrosine-protein phosphatase YVH1	Q02256	1.02927	0.757358	55	6	0.0416148
Truncated transposon Ty1-A Gag-Pol polyprotein	O13527	1.02924	0.1791	67	23	0.04158
DnaJ-like chaperone JEM1	P40358	1.02923	0.154302	57	13	0.0415644
Putative uncharacterized membrane protein YNL109W	P53928	1.02923	0.482041	17	3	0.041562
ATP-NADH kinase YEF1	P32622	1.02894	0.189636	16	6	0.041157
Protein ESC2	Q06340	1.02891	0.0225806	23	6	0.0411126
Purine-cytosine permease FCY2	P17064	1.02883	0.380026	11	3	0.0410054
37S ribosomal protein MRP10, mitochondrial	O75012	1.0287	0.618606	4	3	0.0408279
Low-affinity potassium transport protein	P28584	1.02868	0.452366	39	18	0.040798
Telomere length regulation protein TEN1	Q07921	1.02862	0.698946	20	6	0.0407133
Importin subunit alpha	Q02821	1.02862	0.686239	16	1	0.0407103
54S ribosomal protein L16, mitochondrial	P38064	1.0286	0.429382	77	10	0.0406788
Negative RAS protein regulator protein	P23250	1.02858	0.785809	46	3	0.0406512
Cys-Gly metallodipeptidase DUG1	P43616	1.02855	0.800658	24	7	0.0406163
Sporulation protein RMD6	P39975	1.02855	0.478916	19	5	0.0406137
Uncharacterized protein YGR237C	P50089	1.02847	0.330931	34	12	0.0404945
Sedoheptulose 1,7-bisphosphatase	P36136	1.02847	0.366469	4	1	0.0404941
Facilitator of iron transport 1	Q04433	1.02842	0.571437	5	1	0.0404331
GTPase-activating protein BEM2/IPL2	P39960	1.0284	0.00464592	132	28	0.0403965
Nuclear fusion protein BIK1	P11709	1.02838	0.21104	144	21	0.040371
Antiviral helicase SLH1	P53327	1.02836	0.17248	111	31	0.0403494
PX domain-containing protein YPR097W	Q06839	1.02835	0.560664	103	20	0.0403248
High affinity cysteine transporter	Q12235	1.02833	0.655308	2	2	0.0403004
Uncharacterized protein YDR514C	Q04408	1.0283	0.252252	23	11	0.0402665
Beta-glucan synthesis-associated protein KRE6	P32486	1.0283	0.553809	9	6	0.0402665
Lipid droplet hydrolase 1	P38139	1.02826	0.603481	14	8	0.040207
T-complex protein 1 subunit epsilon	P40413	1.02817	0.169142	51	10	0.0400742
60S ribosomal protein L36-B	O14455	1.02811	0.447505	18	1	0.0399942
Ribosomal RNA-processing protein 1	P35178	1.02807	0.518496	31	7	0.0399413
tRNA-dihydrouridine(20) synthase [NAD(P)+]	P53720	1.02803	0.559336	50	6	0.039879
DNA-directed RNA polymerase I subunit RPA190	P10964	1.02791	0.379555	108	28	0.0397074
Endoribonuclease YSH1	Q06224	1.02787	0.0237716	43	10	0.039653
Protein MUK1	Q02866	1.02785	0.39114	48	9	0.0396268
Uncharacterized transcriptional regulatory protein YLR278C	Q05854	1.02783	0.300257	57	13	0.0396041
Putative uncharacterized protein JIP3	O13555	1.0278	0.661557	1	1	0.0395624
Guanylate kinase	P15454	1.02777	0.748379	4	2	0.0395106
Putative uncharacterized protein Q0144, mitochondrial	Q9ZZW2	1.02775	0.597509	2	1	0.0394836
Mediator of RNA polymerase II transcription subunit 10	Q06213	1.02771	0.663968	12	6	0.0394307
Exocyst complex component EXO84	P38261	1.02757	0.526443	75	10	0.039232
60S ribosomal protein L17-B	P46990	1.0275	0.414498	21	4	0.0391439
Periodic tryptophan protein 2	P25635	1.02749	0.453947	103	10	0.0391269
Quinidine resistance protein 2	P40474	1.02749	0.0470432	13	8	0.0391224
Protein kinase C-like 1	P24583	1.02748	0.249108	63	23	0.039105
Chromatin modification-related protein EAF5	P39995	1.02748	0.602586	12	5	0.0391042
Chitobiosyldiphosphodolichol beta-mannosyltransferase	P16661	1.02746	0.0708523	72	6	0.0390789
Spindle assembly checkpoint kinase	P38991	1.02744	0.30583	31	9	0.0390523
[Pyruvate dehydrogenase [acetyl-transferring]]-phosphatase 2, mitochondrial	P25646	1.02738	0.359911	69	9	0.0389665
Putative transferase CAF17, mitochondrial	P47158	1.02728	0.560934	17	7	0.0388342
Upstream activation factor subunit UAF30	Q08747	1.02727	0.253429	26	5	0.0388209
Intron-encoded DNA endonuclease aI3	P03877	1.02725	0.0182254	45	8	0.0387918
Mitochondrial transcription factor 2	P10849	1.02723	0.67315	21	8	0.0387652
Dihydroxy-acid dehydratase, mitochondrial	P39522	1.0272	0.101537	18	5	0.0387164
Enhancer of mRNA-decapping protein 3	P39998	1.02712	0.524108	15	5	0.0386076
Maf-like protein YOR111W	Q99210	1.02703	0.28318	16	1	0.038476
MIOREX complex component 2	Q05892	1.02701	0.415763	25	6	0.0384535
Uncharacterized protein YNL208W	P40159	1.02695	0.347566	6	1	0.0383701
Glutamate synthase [NADH]	Q12680	1.02695	0.0903551	100	26	0.0383699
RHO1 GDP-GTP exchange protein 2	P51862	1.02694	0.254144	66	16	0.0383587
Protein transport protein SEC13	Q04491	1.02692	0.807589	17	4	0.0383227
Methylthioribose-1-phosphate isomerase	Q06489	1.02684	0.603995	12	6	0.0382145
Protein AST1	P35183	1.02682	0.375392	23	7	0.0381859
Cytochrome b-c1 complex subunit Rieske, mitochondrial	P08067	1.02681	0.735171	4	4	0.0381673
Magnesium transporter ALR2	P43553	1.0268	0.172864	22	9	0.0381592
UPF0320 protein YER188C-A	P0C0V2	1.02679	0.278665	4	1	0.0381367
G1-specific transcription factors activator MSA1	Q08471	1.02675	0.198424	9	4	0.038083
Nuclear cap-binding protein subunit 2	Q08920	1.02675	0.646806	16	4	0.03808
Protein STB2	P46679	1.02669	0.580096	79	19	0.0379952
Putative uncharacterized membrane protein YLR311C	Q06158	1.02666	0.707868	1	1	0.0379602
Protease A inhibitor 3	P01094	1.02665	0.773828	6	3	0.037939
Vacuolar protein sorting-associated protein 9	P54787	1.02665	0.294684	19	11	0.0379374
Pre-mRNA-splicing factor SAD1	P43589	1.02658	0.635255	94	12	0.0378499
DNA-directed RNA polymerases I, II, and III subunit RPABC2	P20435	1.02652	0.751315	2	1	0.0377593
Actin-related protein 4	P80428	1.02649	0.319678	27	11	0.0377257
Ras-like protein 1	P01119	1.02648	0.719654	15	6	0.0377075
Uncharacterized protein RSN1	Q03516	1.02647	0.0667116	45	9	0.0376869
Golgi apparatus membrane protein TVP38	P36164	1.02643	0.829269	3	2	0.0376396
ADP-ribosylation factor-binding protein GGA1	Q06336	1.02642	0.126451	23	10	0.0376154
Ubiquitin carboxyl-terminal hydrolase 5	P39944	1.02635	0.0578147	22	11	0.0375271
Protein RCR1	P38212	1.02632	0.425974	30	2	0.0374761
Structure-specific endonuclease subunit SLX4	Q12098	1.02631	0.559542	42	6	0.0374598
Signal recognition particle subunit SRP72	P38688	1.0263	0.605353	39	14	0.0374587
Phosphoinositide 3-phosphatase	P47147	1.0263	0.0424963	23	11	0.0374559
Actin-regulating kinase PRK1	P40494	1.02627	0.710013	28	11	0.0374106
Probable 26S proteasome regulatory subunit p27	P40555	1.02626	0.774024	4	3	0.0373911
3-hydroxy-3-methylglutaryl-coenzyme A reductase 2	P12684	1.02622	0.675306	6	5	0.0373337
Ubiquitin-like-specific protease 2	P40537	1.02617	0.672388	61	11	0.0372631
Protein RER1	P25560	1.02615	0.345292	5	2	0.0372351
Asparagine--tRNA ligase, cytoplasmic	P38707	1.02605	0.588829	39	3	0.0371014
Peptide methionine sulfoxide reductase	P40029	1.026	0.790366	8	6	0.037026
ATPase-stabilizing factor 9 kDa, mitochondrial	P01098	1.02589	0.512398	4	3	0.0368756
Decapping nuclease RAI1	P53063	1.02584	0.0205486	28	13	0.0368016
Protein CFT1	Q06632	1.02582	0.739399	47	15	0.0367747
Uncharacterized peptide chain release factor-like protein YLR281C, mitochondrial	Q05863	1.02571	0.558371	16	6	0.0366288
Uncharacterized membrane glycoprotein YNR065C	P53751	1.02564	0.110039	74	16	0.0365268
Chromatin assembly factor 1 subunit p60	Q04199	1.02563	0.690888	6	4	0.0365099
Fatty acyl-CoA synthetase and RNA processing-associated kinase 1	Q03002	1.02563	0.759731	26	17	0.0365056
Uncharacterized protein YDL186W	P48568	1.02561	0.371425	9	5	0.0364817
Inositol-pentakisphosphate 2-kinase	Q06667	1.0256	0.594812	43	7	0.0364696
Ras-related protein SEC4	P07560	1.0256	0.561362	9	1	0.0364695
Mediator of RNA polymerase II transcription subunit 16	P32259	1.02552	0.405931	26	11	0.0363577
54S ribosomal protein L34, mitochondrial	Q04598	1.0255	0.837902	2	2	0.0363209
Bud site selection protein 6	P41697	1.02548	0.291076	64	16	0.0363038
V-type proton ATPase subunit F	P39111	1.02548	0.207341	20	2	0.036297
Protein translocation protein SEC63	P14906	1.02545	0.222742	34	12	0.0362574
Weak acid resistance protein 1	Q03631	1.02544	0.215185	35	15	0.0362382
Protein OPI10	Q08202	1.02541	0.607384	12	6	0.0362074
Putative uncharacterized membrane protein YIR036W-A	A0A023PYI5	1.02538	0.853603	3	2	0.0361607
Increased recombination centers protein 19	Q07843	1.02533	0.606977	12	7	0.0360907
Uncharacterized phosphatase YNL010W	P53981	1.02532	0.738037	19	4	0.0360711
Bud emergence protein 4	P39011	1.02525	0.644944	14	5	0.0359827
Kelch repeat-containing protein 2	P50090	1.02523	0.414308	32	20	0.035945
Periodic tryptophan protein 1	P21304	1.02516	0.620139	29	7	0.0358491
Uncharacterized protein YKL070W	P36087	1.02516	0.758963	4	3	0.0358441
54S ribosomal protein L31, mitochondrial	P14063	1.02513	0.626693	30	3	0.0358044
Putative uncharacterized protein YOL150C	Q08293	1.0251	0.441469	6	1	0.0357672
Sorting assembly machinery 35 kDa subunit	P14693	1.02509	0.750841	2	2	0.0357542
Meiosis-specific APC/C activator protein AMA1	P50082	1.02507	0.294384	24	6	0.0357288
Silent chromatin protein ESC1	Q03661	1.02506	0.534154	113	30	0.0357139
3,4-dihydroxy-2-butanone 4-phosphate synthase	Q99258	1.02506	0.720259	8	2	0.0357067
ATPase expression protein 2, mitochondrial	P22136	1.02496	0.550977	46	16	0.0355606
Trafficking protein particle complex subunit BET3	P36149	1.02488	0.751934	5	3	0.0354495
Uncharacterized protein YPL272C	Q08984	1.02478	0.448148	48	8	0.035312
Tyrosine-protein phosphatase MSG5	P38590	1.02478	0.661358	31	4	0.0353084
Zinc finger transcription factor YRR1	Q12172	1.0247	0.170149	32	12	0.0352042
Uncharacterized membrane protein YMR253C	Q04835	1.02467	0.663479	7	3	0.0351661
37S ribosomal protein SWS2, mitochondrial	P53937	1.02461	0.453539	23	4	0.0350787
Ribosome biogenesis protein TSR1	Q07381	1.0246	0.720293	93	10	0.0350586
Aldehyde dehydrogenase 5, mitochondrial	P40047	1.02459	0.469174	67	8	0.0350433
ARS-binding factor 1	P14164	1.02449	0.574649	67	12	0.0349111
26S proteasome regulatory subunit RPN3	P40016	1.02446	0.206223	28	10	0.0348594
Acetyl-CoA carboxylase	Q00955	1.02445	0.599144	129	35	0.0348464
ADP-ribosylation factor GTPase-activating protein effector protein 1	Q04412	1.02443	0.448073	12	8	0.0348237
Sterol uptake protein 1	P53032	1.02441	0.85887	30	5	0.0348
mRNA-decapping enzyme subunit 1	Q12517	1.02441	0.295797	5	3	0.0347951
Protein NNF2	P53253	1.02438	0.252532	74	22	0.0347576
Uncharacterized membrane protein YOR365C	Q08844	1.02427	0.639558	4	4	0.0345968
Trehalose synthase complex regulatory subunit TPS3	P38426	1.02409	0.412488	96	12	0.0343491
54S ribosomal protein L6, mitochondrial	P32904	1.02409	0.170958	27	4	0.0343437
Threonine--tRNA ligase, mitochondrial	P07236	1.02407	0.402968	34	11	0.03432
Uncharacterized membrane protein YGR016W	P53209	1.02404	0.266332	23	1	0.0342742
VPS4-associated protein 1	P40080	1.02402	0.309359	9	6	0.0342407
Rho-GTPase-activating protein LRG1	P35688	1.02396	0.400033	36	12	0.0341655
Probable ATP-dependent permease	P25371	1.02394	0.543228	30	18	0.034129
Uncharacterized membrane protein YIL089W	P40500	1.02389	0.668273	9	5	0.0340552
mRNA-capping enzyme subunit alpha	Q01159	1.02388	0.627576	24	2	0.0340469
AMP deaminase	P15274	1.02385	0.212278	59	18	0.0340068
RNA-binding suppressor of PAS kinase protein 1	Q05672	1.02383	0.358734	63	11	0.0339701
Uncharacterized oxidoreductase YDL114W	Q07530	1.02371	0.781064	59	6	0.0338128
DNA repair protein RAD51	P25454	1.0237	0.856341	3	3	0.0337873
tRNA(Thr) (cytosine(32)-N(3))-methyltransferase	Q08641	1.02369	0.23395	57	16	0.0337817
Proteasome component ECM29	P38737	1.02369	0.419272	165	26	0.0337763
Acyl-coenzyme A oxidase	P13711	1.02368	0.358393	83	14	0.0337659
Vacuolar-sorting protein SNF7	P39929	1.02366	0.69365	3	1	0.0337431
Transcription initiation factor TFIID subunit 1	P46677	1.0236	0.126472	60	21	0.033656
Genetic interactor of prohibitin 7, mitochondrial	P53171	1.02359	0.0597096	28	6	0.0336401
DnaJ-like protein 1	P40564	1.02359	0.785204	14	6	0.0336349
Uncharacterized protein YMR252C	Q04814	1.02358	0.408372	62	6	0.0336261
Altered inheritance rate of mitochondria protein 25	P47140	1.02355	0.684394	22	5	0.0335872
GPN-loop GTPase 1	P47122	1.02353	0.542194	7	5	0.0335593
Uncharacterized protein YKR075C	P36155	1.02353	0.448967	5	5	0.0335546
RING finger protein PSH1	Q12161	1.02351	0.290482	13	4	0.0335317
54S ribosomal protein L10, mitochondrial	P36520	1.02351	0.206379	65	21	0.0335191
Medium-chain fatty acid ethyl ester synthase/esterase 1	Q02891	1.0235	0.200203	45	8	0.0335126
Arsenical-resistance protein 3	Q06598	1.0235	0.638965	12	6	0.033508
Uncharacterized protein TRE1	Q08919	1.02347	0.70669	12	7	0.0334645
Peptide-N(4)-(N-acetyl-beta-glucosaminyl)asparagine amidase	Q02890	1.02346	0.0162043	79	16	0.033461
Probable alanine aminotransferase	P52892	1.0234	0.697002	88	9	0.033372
SWIRM domain-containing protein FUN19	P28003	1.02336	0.419831	13	7	0.033312
Vacuolar-sorting protein SNF8	Q12483	1.0233	0.660486	12	6	0.033227
Putative uncharacterized protein YKR012C	P36109	1.02325	0.641937	11	5	0.0331596
Cell wall integrity and stress response component 4	P38739	1.02324	0.392864	21	4	0.033142
Methylenetetrahydrofolate reductase 2	P53128	1.02323	0.547774	24	7	0.033135
Uncharacterized protein YBR197C	P38306	1.02322	0.687477	10	5	0.0331232
tRNA-specific adenosine deaminase subunit TAD2	P47058	1.02315	0.776199	34	10	0.0330223
GTPase-activating protein GYP3	P48566	1.02313	0.28563	55	7	0.0329867
Peroxisomal acyl-coenzyme A thioester hydrolase 1	P41903	1.02307	0.720656	37	9	0.0329051
Structural protein MDM1	Q01846	1.02304	0.0359421	39	20	0.0328631
Transposon Ty1-BR Gag-Pol polyprotein	Q12193	1.023	0.123463	128	42	0.0328123
Uncharacterized protein YNL018C	P53976	1.023	0.408359	24	9	0.0328119
Probable ATP-dependent kinase TDA10	P42938	1.02297	0.415928	4	4	0.0327634
Probable phospholipase YOR022C, mitochondrial	Q12204	1.02295	0.453247	35	9	0.0327352
Ribonuclease P/MRP protein subunit RPP1	P38786	1.02294	0.616366	15	8	0.0327166
54S ribosomal protein L49, mitochondrial	P40858	1.02291	0.542587	2	1	0.0326825
Arrestin-related trafficking adapter 5	P53244	1.02288	0.625517	19	7	0.0326432
Tyrosine-protein phosphatase CDC14	Q00684	1.02288	0.0760421	14	3	0.0326427
Multifunctional tryptophan biosynthesis protein	P00937	1.02287	0.628006	16	5	0.0326226
Protein ECM18	Q04623	1.02286	0.104096	19	10	0.0326066
Elongation of fatty acids protein 1	P39540	1.02283	0.554272	4	3	0.0325691
Oligopeptide transporter 1	P40897	1.0228	0.303597	25	9	0.0325241
tRNA (cytidine(32)/guanosine(34)-2'-O)-methyltransferase	P38238	1.0227	0.916071	3	3	0.0323821
Protein MUM2	P38236	1.02269	0.701397	22	5	0.0323626
Monopolin complex subunit LRS4	Q04087	1.02267	0.691266	8	5	0.0323465
Glutathione S-transferase omega-like 3	Q04806	1.02267	0.519735	38	5	0.0323339
Lipid phosphate phosphatase 1	P32590	1.02266	0.0595045	47	23	0.0323335
Dolichyl-diphosphooligosaccharide--protein glycosyltransferase subunit 1	P41543	1.0226	0.723028	11	6	0.0322418
Octanoyltransferase, mitochondrial	Q06005	1.0226	0.748139	7	5	0.0322387
Uncharacterized membrane protein YFL034W	P43564	1.02252	0.0207804	44	15	0.032129
Probable transcription factor HMS2	P47175	1.02252	0.316162	15	3	0.0321283
26S proteasome regulatory subunit RPN14	P53196	1.02239	0.44587	23	8	0.0319503
Altered inheritance of mitochondria protein 9, mitochondrial	P40053	1.02232	0.634104	82	21	0.0318523
Putative tyrosine-protein phosphatase OCA1	P50946	1.0223	0.756706	2	2	0.0318158
Spindle pole body component SPC98	P53540	1.02226	0.461773	64	13	0.0317675
Minichromosome maintenance protein 10	P32354	1.02226	0.549105	84	15	0.0317582
SVP1-like protein 2	P50079	1.02224	0.528113	27	11	0.0317381
Autophagy-related protein 33	Q06485	1.0222	0.479909	6	1	0.0316747
Nuclear import protein MOG1	P47123	1.02219	0.896585	1	1	0.0316696
Glycogen synthase kinase-3 homolog YGK3	Q12222	1.02209	0.526247	25	5	0.031523
Uncharacterized bolA-like protein YAL044W-A	Q3E793	1.02197	0.467815	33	2	0.0313546
DNA mismatch repair protein MSH3	P25336	1.02196	0.681982	32	19	0.0313412
Amidophosphoribosyltransferase	P04046	1.02188	0.66131	26	6	0.0312307
Protein SOV1, mitochondrial	Q04748	1.02186	0.556109	32	12	0.0311911
rRNA 2'-O-methyltransferase fibrillarin	P15646	1.02184	0.754523	36	6	0.0311744
ADP-ribosylation factor GTPase-activating protein GLO3	P38682	1.02184	0.158912	36	11	0.0311639
SIT4-associating protein SAP185	P40856	1.02183	0.627085	20	7	0.0311579
Putative uncharacterized protein YLR334C	Q06127	1.02182	0.748916	4	1	0.031147
Elongation factor G, mitochondrial	P25039	1.02182	0.706805	26	12	0.0311444
Uncharacterized protein IRC8	P47046	1.0218	0.723019	32	12	0.0311119
Eukaryotic translation initiation factor 2 subunit gamma	P32481	1.02178	0.802788	18	2	0.03109
Protein ECM21	P38167	1.02177	0.524719	11	7	0.0310708
Intermediate cleaving peptidase 55	P40051	1.02174	0.84228	30	8	0.0310323
Kinetochore-associated protein NSL1	Q12143	1.02173	0.746881	4	3	0.0310082
ADP,ATP carrier protein 3	P18238	1.02172	0.0474364	30	6	0.0310017
Histone H1	P53551	1.02169	0.67491	17	8	0.0309615
Dipeptidyl aminopeptidase B	P18962	1.02167	0.728117	34	10	0.0309266
Protein FMP27, mitochondrial	Q06179	1.02165	0.363856	189	53	0.0309007
Fluconazole resistance protein 1	P38124	1.02164	0.794824	17	3	0.030887
54S ribosomal protein L25, mitochondrial	P23369	1.02163	0.716826	24	6	0.0308723
Nuclear division defective protein 1	Q08887	1.02156	0.541175	6	5	0.0307778
UPF0061 protein FMP40	Q08968	1.02155	0.385879	40	13	0.0307544
S-adenosylmethionine synthase 2	P19358	1.0215	0.515115	29	10	0.0306836
DASH complex subunit DAD3	P69850	1.02149	0.924273	4	2	0.0306801
Protein GIR2	Q03768	1.02149	0.745802	15	10	0.0306776
Histone acetyltransferase type B subunit 2	P39984	1.02149	0.733794	67	2	0.0306684
Tryptophan permease	P38967	1.02147	0.856356	45	9	0.0306486
Acetolactate synthase catalytic subunit, mitochondrial	P07342	1.0214	0.573398	41	3	0.0305499
rRNA biogenesis protein RRP5	Q05022	1.02138	0.0361571	99	30	0.0305193
F-box protein SKP2	P42843	1.02138	0.298508	25	10	0.0305186
Mitochondrial membrane protein FMP33	P46998	1.0213	0.717991	54	2	0.0304016
Transcription elongation factor SPT5	P27692	1.02127	0.575047	144	16	0.0303707
Pre-tRNA-processing protein PTA1	Q01329	1.02127	0.682351	7	5	0.0303676
54S ribosomal protein L20, mitochondrial	P22354	1.02127	0.6279	29	4	0.0303673
Chromatin structure-remodeling complex subunit RSC7	P32832	1.02113	0.725779	8	5	0.0301633
Vacuolar membrane-associated protein IML1	P47170	1.02106	0.279117	102	24	0.030062
Glycerol kinase	P32190	1.02105	0.855333	101	13	0.0300575
Meiotic recombination protein REC114	P32841	1.02104	0.107405	18	6	0.0300382
Dynamin-like GTPase MGM1, mitochondrial	P32266	1.02098	0.315694	70	19	0.0299601
Cystathionine beta-lyase	P53101	1.02098	0.805579	97	1	0.0299545
Steryl acetyl hydrolase 1	P53324	1.02093	0.334175	18	6	0.0298802
GMP synthase [glutamine-hydrolyzing]	P38625	1.02057	0.40033	33	5	0.0293768
Protein arginine N-methyltransferase SFM1	Q12314	1.02053	0.865142	7	3	0.0293205
RuvB-like protein 1	Q03940	1.02052	0.819921	9	4	0.0293025
V-type proton ATPase subunit a, Golgi isoform	P37296	1.02046	0.726957	7	7	0.0292223
RNA exonuclease NGL2	Q03264	1.02028	0.827086	30	6	0.0289651
Oxysterol-binding protein homolog 2	Q12451	1.02028	0.578625	155	21	0.0289643
G2/mitotic-specific cyclin-4	P24871	1.02028	0.176606	21	8	0.0289614
Cell division control protein 50	P25656	1.02026	0.454191	50	10	0.028935
Sphingoid long chain base kinase 4	Q12246	1.0202	0.328976	72	9	0.0288545
N-terminal acetyltransferase A complex catalytic subunit ARD1	P07347	1.02007	0.858509	10	2	0.0286638
Uncharacterized transporter YNL095C	P53932	1.02003	0.895724	8	2	0.0286081
Putative uncharacterized protein VPS65	O13554	1.02002	0.890069	6	2	0.0285979
Citrate synthase, peroxisomal	P08679	1.01999	0.755292	12	9	0.028551
Ubiquitin-binding protein CUE5	Q08412	1.01993	0.148959	13	8	0.028466
Tat-binding homolog 7	P40340	1.01989	0.695849	22	12	0.0284177
Probable transporter MCH2	P36032	1.01988	0.714005	4	2	0.0284035
Uracil permease	P05316	1.01987	0.469738	36	11	0.0283809
Condensin complex subunit 2	P38170	1.01986	0.354067	48	16	0.0283719
G protein-coupled receptor GPR1	Q12361	1.01982	0.569393	68	11	0.0283212
Protein SPT2	P06843	1.01976	0.0660358	28	9	0.0282263
Dihydrolipoyllysine-residue succinyltransferase component of 2-oxoglutarate dehydrogenase complex, mitochondrial	P19262	1.01971	0.737401	11	6	0.0281627
Vacuolar membrane protein YNL058C	P53947	1.01969	0.883493	9	5	0.02813
Putative uncharacterized protein YLL047W	Q07881	1.01968	0.753558	5	2	0.0281097
MAP kinase kinase PBS2	P08018	1.01967	0.708797	13	8	0.028105
Phosphatidylserine decarboxylase proenzyme 2	P53037	1.01966	0.446265	48	24	0.0280934
Protein YIG1	Q08956	1.01962	0.63537	54	11	0.0280283
TPR repeat-containing protein associated with Hsp90	P25638	1.0196	0.575815	8	3	0.0280026
Protein FMP25, mitochondrial	Q08023	1.01959	0.706881	18	6	0.0279913
MAU2 chromatid cohesion factor homolog	P40090	1.01958	0.193003	59	14	0.0279792
Uncharacterized protein YBR184W	P38299	1.01955	0.455873	26	11	0.0279329
3-isopropylmalate dehydratase	P07264	1.01953	0.411669	61	16	0.027903
Anaphase spindle elongation protein	P50275	1.01951	0.691271	29	18	0.027878
Biotin--protein ligase	P48445	1.01946	0.772046	24	8	0.0278081
ATP-dependent permease AUS1	Q08409	1.01944	0.688911	32	11	0.027775
DNA ligase 1	P04819	1.01937	0.574371	20	10	0.027676
Transposon Ty1-NL1 Gag-Pol polyprotein	Q12112	1.01935	0.114886	127	42	0.0276538
Cell division control protein 24	P11433	1.01935	0.0730392	43	14	0.0276498
DNA replication regulator SLD2	P34252	1.01935	0.393166	73	12	0.0276448
Ribosome-associated complex subunit SSZ1	P38788	1.01928	0.104913	20	3	0.0275444
D-3-phosphoglycerate dehydrogenase 2	P40510	1.01917	0.751381	14	8	0.02739
UPF0508 protein YJR030C	P47101	1.01913	0.750725	43	18	0.0273448
Uncharacterized protein YPR078C	Q06813	1.01899	0.757914	18	5	0.0271373
Ribonuclease H2 subunit C	Q12338	1.01894	0.488001	3	2	0.0270761
Enhancer of translation termination 1	Q08421	1.01891	0.766466	28	3	0.027024
Restriction of telomere capping protein 4	P53850	1.01885	0.595474	17	12	0.02694
Ribosome assembly factor MRT4	P33201	1.01884	0.322209	11	5	0.0269219
Nuclear migration protein JNM1	P36224	1.0188	0.759602	10	7	0.0268643
Putative uncharacterized protein YOR015W	Q12169	1.01879	0.457821	16	4	0.0268519
Catalase T	P06115	1.01877	0.56084	33	5	0.0268268
Putative vacuolar protein sorting-associated protein TDA6	Q06466	1.01868	0.630794	4	2	0.0267046
Pre-mRNA-splicing factor SYF1	Q04048	1.01859	0.649878	23	14	0.0265732
Elongation factor Tu, mitochondrial	P02992	1.01858	0.0302484	5	4	0.0265605
Phosphate metabolism protein 6	Q05637	1.01857	0.720967	2	1	0.0265473
Serine/threonine-protein kinase RAD53	P22216	1.01857	0.567813	22	6	0.0265463
eRF1 methyltransferase catalytic subunit MTQ2	Q03920	1.01855	0.494328	17	2	0.0265177
Protein MNE1	P24720	1.01854	0.340288	30	8	0.0264986
Nuclear control of ATPase protein 2	Q12374	1.01851	0.540084	24	12	0.0264594
Ribonuclease H2 subunit B	Q05635	1.01849	0.398282	15	5	0.0264289
ADP,ATP carrier protein 1	P04710	1.01835	0.795125	23	7	0.0262401
Non-SCF-type F-box protein ROY1	Q04847	1.01829	0.316196	21	9	0.02615
Glycine dehydrogenase (decarboxylating), mitochondrial	P49095	1.01824	0.685576	32	13	0.0260788
Probable DNA-binding protein SNT1	P25357	1.01821	0.428478	201	26	0.0260313
Coatomer subunit alpha	P53622	1.01819	0.0841642	65	16	0.026003
Ran-specific GTPase-activating protein 30	P53107	1.01817	0.337938	17	10	0.0259798
Phosphoglycerate mutase 2	Q12008	1.01813	0.515084	60	10	0.0259172
Elongation factor 1 alpha-like protein	P32769	1.01805	0.840638	10	5	0.0258064
Nucleolar pre-ribosomal-associated protein 2	P47108	1.01805	0.394308	75	17	0.0258028
DNA replication regulator DPB11	P47027	1.01796	0.568629	31	12	0.0256784
Protein transport protein SEC31	P38968	1.01795	0.400318	100	7	0.02566
Mitochondrial import inner membrane translocase subunit TIM54	P47045	1.01793	0.455803	50	14	0.0256448
DNA-directed RNA polymerase III subunit RPC1	P04051	1.01793	0.14396	55	23	0.0256395
Myosin-3	P36006	1.01793	0.486128	80	24	0.0256349
Glutaredoxin-8	Q05926	1.01789	0.581275	8	3	0.0255845
S-methyl-5'-thioadenosine phosphorylase	Q07938	1.01778	0.784721	8	6	0.0254195
RNA cytidine acetyltransferase	P53914	1.01775	0.601586	26	16	0.0253893
Putative uncharacterized protein YER135C	P40082	1.01773	0.75829	7	3	0.0253503
Solute carrier family 25 member 38 homolog	Q07534	1.01769	0.699293	2	2	0.0253024
Conserved oligomeric Golgi complex subunit 7	P53195	1.01769	0.632391	9	3	0.0253007
Potential protein lysine methyltransferase SET6	Q12529	1.01768	0.761642	7	3	0.025287
Zinc finger protein YPR015C	Q12531	1.01767	0.690899	2	2	0.0252725
Putative uncharacterized protein YDR509W	P87272	1.01767	0.606032	9	3	0.0252668
Serine/threonine-protein phosphatase PPQ	P32945	1.01764	0.579692	49	11	0.0252335
tRNA (guanosine(18)-2'-O)-methyltransferase	Q07527	1.0176	0.650248	148	26	0.0251767
Regulator of phospholipase D SRF1	Q12516	1.01754	0.733519	39	9	0.0250785
Mitochondrial inner membrane i-AAA protease supercomplex subunit MGR3	Q04472	1.01753	0.291364	78	11	0.0250695
Probable family 17 glucosidase SCW4	P53334	1.01747	0.706057	10	5	0.0249923
4-amino-5-hydroxymethyl-2-methylpyrimidine phosphate synthase THI12	P42883	1.01744	0.520647	20	7	0.0249489
Checkpoint protein RAD24	P32641	1.01744	0.55918	59	12	0.0249483
Transmembrane 9 superfamily member 3	P40071	1.01736	0.779044	43	7	0.0248259
Poly(A) RNA polymerase protein 2	P53632	1.0173	0.42339	42	13	0.0247477
SED5-binding protein 3	P38810	1.0173	0.784349	41	12	0.0247439
Histone acetyltransferase type B catalytic subunit	Q12341	1.01729	0.623271	58	10	0.0247314
NADPH-dependent alpha-keto amide reductase	Q07551	1.01726	0.508275	8	5	0.0246899
Serine/threonine-protein kinase BCK1/SLK1/SSP31	Q01389	1.01723	0.106014	41	18	0.0246522
AP-1 accessory protein LAA1	P39526	1.0172	0.524962	133	23	0.0246004
Casein kinase I homolog HRR25	P29295	1.01714	0.822988	68	10	0.0245127
Uncharacterized protein YGR151C	P53287	1.01712	0.691665	20	2	0.0244968
U3 small nucleolar RNA-associated protein 15	Q04305	1.01711	0.739459	96	5	0.0244817
Transcription initiation factor TFIID subunit 8	Q03750	1.01709	0.830647	16	6	0.0244529
Vacuolar import and degradation protein 22	Q05934	1.01709	0.609125	43	13	0.0244448
Proteasome maturation factor UMP1	P38293	1.01708	0.750138	10	4	0.0244386
Homoserine kinase	P17423	1.01707	0.527586	16	2	0.0244149
Pre-rRNA-processing protein TSR2	Q06672	1.01705	0.866601	6	2	0.0243958
Probable ADP-ribose 1''-phosphate phosphatase YML087W	Q04299	1.01705	0.817591	3	3	0.024393
Restriction of telomere capping protein 5	Q12108	1.01704	0.426904	21	8	0.0243817
Delta-aminolevulinic acid dehydratase	P05373	1.01703	0.781873	7	4	0.0243641
DNA repair helicase RAD25	Q00578	1.017	0.719722	28	13	0.0243144
Putative glycosyltransferase HOC1	P47124	1.01698	0.845062	23	9	0.0242938
Putative carboxymethylenebutenolidase	Q07505	1.01695	0.899196	3	2	0.0242554
E3 ubiquitin-protein ligase HEL2	P36113	1.01687	0.763606	228	1	0.0241397
Epsin-2	Q05785	1.01681	0.370387	15	7	0.0240538
Elongator complex protein 4	Q02884	1.01678	0.753349	27	5	0.0240022
Protein farnesyltransferase/geranylgeranyltransferase type-1 subunit alpha	P29703	1.01664	0.740586	103	6	0.0238149
Anion/proton exchange transporter GEF1	P37020	1.01661	0.705373	58	18	0.0237708
Homocitrate dehydratase, mitochondrial	P39533	1.01655	0.426463	79	13	0.0236765
Protein transport protein SEC23	P15303	1.01649	0.819438	46	1	0.0236007
Squalene monooxygenase	P32476	1.01647	0.775119	18	9	0.023573
Kelch repeat-containing protein 1	P38853	1.01645	0.0793982	62	24	0.023546
TY1 enhancer activator	P47988	1.01645	0.389839	35	5	0.0235377
Uncharacterized protein YGL036W	P53185	1.01642	0.833069	23	11	0.0234943
Uncharacterized protein YER090C-A	P0C5M8	1.01642	0.82706	2	1	0.0234897
Transcriptional activator/repressor GIS1	Q03833	1.0164	0.721422	27	8	0.0234739
DNA topoisomerase 1	P04786	1.01638	0.531751	94	21	0.0234465
Phosphatidylinositol 4-kinase STT4	P37297	1.01626	0.254368	98	30	0.0232663
Putative protein lysine methyltransferase SET5	P38890	1.01625	0.671351	93	13	0.0232544
Protein ECM30	Q06673	1.01623	0.527332	58	10	0.0232259
HMG2-induced ER-remodeling protein 1	Q12276	1.01617	0.444354	91	17	0.0231435
Vacuolar protein-sorting-associated protein 25	O13576	1.01615	0.871549	60	7	0.0231069
Ribosome biogenesis protein SSF2	Q12153	1.01601	0.721223	18	11	0.0229191
Uncharacterized protein YJL049W	P47048	1.01591	0.788445	23	9	0.0227675
Protein LAS1	P36146	1.01582	0.0823652	56	16	0.0226475
Putative uncharacterized protein YHL042W	P38729	1.01579	0.625696	71	5	0.022605
Nitrogen permease regulator 2	P39923	1.01577	0.830931	59	9	0.0225717
YAP1-binding protein 1	P38315	1.01576	0.71111	66	16	0.0225544
Maltose fermentation regulatory protein MAL13	P53338	1.01575	0.840449	9	5	0.0225513
Putative uncharacterized protein YNL266W	P53842	1.01565	0.603015	7	1	0.0223984
37S ribosomal protein S17, mitochondrial	Q03246	1.01565	0.744356	17	9	0.0223982
RNA 3'-terminal phosphate cyclase-like protein	Q08096	1.01564	0.681831	8	6	0.0223882
Cyclin-dependent protein kinase PHO85	P17157	1.01563	0.584461	7	3	0.0223748
Nuclear envelope protein YPR174C	Q06616	1.01554	0.806822	10	4	0.0222401
Serine/threonine-protein kinase SCH9	P11792	1.01548	0.830761	24	7	0.0221595
Putative uncharacterized protein YDL050C	Q07355	1.01536	0.811679	9	3	0.021996
Protein phosphatase 2C homolog 7, mitochondrial	P38797	1.01536	0.617561	72	5	0.0219855
Ribosomal RNA-processing protein 17	Q04031	1.01525	0.86546	20	7	0.0218308
Uncharacterized protein YBR071W	P38243	1.01523	0.764811	15	5	0.0218052
Transcription-associated protein 1	P38811	1.01522	0.598258	127	42	0.0217912
Coatomer subunit gamma	P32074	1.0152	0.578065	55	1	0.021758
Pre-rRNA-processing protein IPI1	P38803	1.0152	0.824885	6	1	0.0217575
High-affinity glucose transporter SNF3	P10870	1.01519	0.671434	16	7	0.0217541
Uncharacterized protein YPR148C	Q06523	1.01517	0.6768	18	7	0.0217263
Uncharacterized protein YPL071C	Q02864	1.01517	0.389166	57	6	0.0217258
Thiamine biosynthesis regulatory protein	P38141	1.01516	0.745817	31	5	0.0217092
Superkiller protein 3	P17883	1.01515	0.583015	86	20	0.0216877
Protein NUD1	P32336	1.01514	0.668022	24	12	0.0216739
54S ribosomal protein L13, mitochondrial	Q02204	1.01507	0.773603	15	5	0.0215725
Protein SRN2	Q99176	1.01506	0.861076	10	6	0.0215619
UPF0744 protein YSC83	P32792	1.01501	0.545259	24	10	0.0214922
DNA repair protein RAD5	P32849	1.01499	0.588394	42	21	0.0214687
Putative uncharacterized protein YHR071C-A	A0A023PXF2	1.0149	0.79697	14	3	0.0213408
60S ribosomal protein L6-B	P05739	1.01486	0.813533	5	3	0.0212764
PAB-dependent poly(A)-specific ribonuclease subunit PAN2	P53010	1.01484	0.763461	44	20	0.0212509
Nucleolar complex protein 2	P39744	1.01483	0.431458	54	21	0.021242
Hsp70 nucleotide exchange factor FES1	P38260	1.01481	0.880821	41	4	0.0212029
Nucleolar pre-ribosomal-associated protein 1	P34241	1.01472	0.185826	64	27	0.0210787
Phosphatidic acid phosphohydrolase 1	P32567	1.0147	0.811671	34	9	0.0210543
Uncharacterized protein YBR259W	P38338	1.01469	0.144521	56	15	0.0210338
U3 small nucleolar RNA-associated protein 12	Q12220	1.01468	0.218304	59	18	0.02103
Nuclear mRNA export protein THP1	Q08231	1.01468	0.376781	20	8	0.0210274
Cell division control protein 4	P07834	1.01466	0.757651	41	15	0.0209931
Cell division control protein 12	P32468	1.01455	0.793799	7	5	0.0208412
RNA polymerase II nuclear localization protein IWR1	Q07532	1.01453	0.842204	36	9	0.0208175
Putative uncharacterized membrane protein YHL019W-A	A0A023PXL1	1.01453	0.574644	3	2	0.020806
Formate dehydrogenase 1	Q08911	1.01452	0.781229	19	6	0.0207992
Meiosis induction protein kinase IME2/SME1	P32581	1.0145	0.747144	8	6	0.0207724
Serine/threonine-protein kinase RIM15	P43565	1.01443	0.727951	28	18	0.0206736
Uncharacterized membrane glycoprotein YNR066C	P53752	1.01441	0.883893	6	3	0.0206378
RNA polymerase I-specific transcription initiation factor RRN10	P38204	1.01432	0.884314	4	3	0.0205163
Protein SIP5	P40210	1.01428	0.822502	14	6	0.0204527
Polyphosphatidylinositol phosphatase INP52	P50942	1.01427	0.875941	27	16	0.0204397
Non-histone protein 10	Q03435	1.01425	0.752341	9	5	0.0204141
DNA repair protein RAD50	P12753	1.01423	0.212307	113	32	0.0203866
Malate dehydrogenase, peroxisomal	P32419	1.01423	0.809261	8	5	0.0203824
Protein STE12	P13574	1.01422	0.787004	23	6	0.0203756
Uncharacterized mitochondrial membrane protein FMP10	P40098	1.01418	0.744263	9	7	0.0203162
Uncharacterized transcriptional regulatory protein YNR063W	P53749	1.01415	0.672833	17	7	0.0202689
Oleate activated transcription factor 3	P36023	1.01414	0.230047	108	21	0.0202614
Diphthamide biosynthesis protein 1	P40487	1.0141	0.49396	29	3	0.0201947
Uncharacterized oxidoreductase AIM33	Q04516	1.01409	0.292317	106	9	0.0201829
Anaphase-promoting complex subunit 1	P53886	1.01408	0.280833	115	24	0.0201774
MIOREX complex component 6	P48564	1.01407	0.342314	115	19	0.0201525
NAD-dependent histone deacetylase HST3	P53687	1.01402	0.850909	11	6	0.0200896
Tubulin-specific chaperone C	P46670	1.014	0.544787	7	4	0.0200541
Synaptonemal complex protein ZIP1	P31111	1.01396	0.259057	57	23	0.0200056
Ornithine carbamoyltransferase	P05150	1.01395	0.828382	51	5	0.0199919
Putative uncharacterized protein YIR020C-B	Q03888	1.01395	0.852958	13	4	0.0199904
DNA-directed RNA polymerase III subunit RPC10	Q04307	1.01395	0.548262	4	1	0.0199857
U3 small nucleolar RNA-associated protein 21	Q06078	1.01392	0.768017	18	13	0.0199381
Mitochondrial 2-oxodicarboxylate carrier 1	Q03028	1.01391	0.891307	21	3	0.0199366
Actin-related protein 2	P32381	1.0139	0.818929	15	5	0.0199084
DNA polymerase alpha-associated DNA helicase A	P34243	1.01383	0.732956	75	21	0.0198183
Protein PXR1	P53335	1.01383	0.900696	13	3	0.0198118
Pachytene arrest protein SAE3	P89114	1.01377	0.626687	4	2	0.0197238
26S protease regulatory subunit 7 homolog	P33299	1.01371	0.806604	24	9	0.0196404
Putative mitochondrial carrier protein PET8	P38921	1.01369	0.924793	23	2	0.0196142
Protein ROG3	P43602	1.01366	0.734291	10	1	0.0195718
Ribosome biogenesis protein NSA1	P53136	1.01366	0.77748	10	5	0.0195715
Phosphatidylglycerol/phosphatidylinositol transfer protein	Q12408	1.01366	0.876114	6	2	0.0195687
Nucleoporin POM152	P39685	1.01364	0.59297	148	37	0.0195462
Nucleolar protein 56	Q12460	1.01347	0.840404	13	7	0.0193004
[truncated: 3,110 more rows]
